# Supplementary material for: Proteomic Study of Entamoeba histolytica Trophozoites, Cysts, and Cyst-Like Structures
Source: PLoS One. 2016 May 26;11(5):e0156018. doi: 10.1371/journal.pone.0156018 (PMC4882050; doi:10.1371/journal.pone.0156018)
Supplement: S1 Table — (XLS) [file pone.0156018.s001.xls]

## Sheet: Total proteins
				Peptides			Peptides-Hits
Protein Name	Entry name	Protein name	Gene name	Trophozoites	Cyst-Like Structures	Cysts	Trophozoites	Cyst-Like Structures	Cysts	Parsimony Type	Cluster	Equiv. Proteins
S0AWJ4	S0AWJ4_ENTHI	Actin, putative		100	45	10	645	358	68	DIFFERENTIABLE	123
S0AUW6	S0AUW6_ENTHI	Actin		97	46	10	645	373	68	DIFFERENTIABLE	123
S0AWF4	S0AWF4_ENTHI	Actin		96	45	10	640	363	68	DIFFERENTIABLE	123
S0AWZ1	S0AWZ1_ENTHI	Actin		100	46	10	639	363	68	DIFFERENTIABLE	123
S0AWJ9	S0AWJ9_ENTHI	Actin, putative		94	45	10	635	363	68	DIFFERENTIABLE	123
S0AUT4	S0AUT4_ENTHI	Actin, putative		97	44	10	626	361	68	DIFFERENTIABLE	123
S0AUS7	S0AUS7_ENTHI	Actin, putative		95	43	9	616	354	64	DIFFERENTIABLE	123
S0AVA7	S0AVA7_ENTHI	Actin, putative		94	44	9	608	361	66	DIFFERENTIABLE	123
S0AWA2	S0AWA2_ENTHI	Actin, putative		91	40	10	605	331	68	DIFFERENTIABLE	123
S0AXB5	S0AXB5_ENTHI	Actin, putative		83	40	11	596	331	70	DIFFERENTIABLE	123
S0AV75	S0AV75_ENTHI	Actin, putative		92	45	10	586	346	68	DIFFERENTIABLE	123
Q9TYD6	Q9TYD6_ENTHI	Actin		96	43	10	583	342	68	DIFFERENTIABLE	123
S0AUR6	S0AUR6_ENTHI	Actin, putative		90	40	9	583	332	64	DIFFERENTIABLE	123
S0AV23	S0AV23_ENTHI	Actin, putative		87	43	8	579	324	51	DIFFERENTIABLE	123
S0AVQ9	S0AVQ9_ENTHI	Actin, putative		90	46	10	568	337	68	DIFFERENTIABLE	123
S0AWT4	S0AWT4_ENTHI	Actin, putative		74	34	8	536	296	63	DIFFERENTIABLE	123
Q24801	Q24801_ENTHI	Pyruvate phosphate dikinase	EHI_009530	113	64	2	517	285	4	DIFFERENTIABLE	127
C4LTX6	C4LTX6_ENTHI	Pyruvate:ferredoxin oxidoreductase	EHI_051060	133	59	0	487	185	0	DIFFERENTIABLE	22
B1N621	B1N621_ENTHI	Actin, putative	EHI_043640	79	38	9	487	282	66	DIFFERENTIABLE	123
S0AW09	S0AW09_ENTHI	Actin, putative		86	40	8	478	285	35	DIFFERENTIABLE	123
S0AV15	S0AV15_ENTHI	Actin, putative		75	38	8	444	280	38	DIFFERENTIABLE	123
C4M2R2	C4M2R2_ENTHI	Alcohol dehydrogenase, putative	EHI_160940	119	81	0	438	518	0	DIFFERENTIABLE	54
S0AVT2	S0AVT2_ENTHI	Actin, putative		66	35	7	421	251	50	DIFFERENTIABLE	123
Q24803	ADH2_ENTHI	Aldehyde-alcohol dehydrogenase 2	ADH2	114	79	0	393	472	0	DIFFERENTIABLE	54
C4LXE8	C4LXE8_ENTHI	Enolase, putative	EHI_130700	63	36	0	373	164	0	SUPERSET	9	P51555, S0AWN3
S0AW06	S0AW06_ENTHI	Enolase, putative		61	35	0	367	162	0	DIFFERENTIABLE	9
B1N387	B1N387_ENTHI	Aldehyde-alcohol dehydrogenase 2, putative	EHI_024240	100	67	0	352	399	0	DIFFERENTIABLE	54
Q24860	Q24860_ENTHI	Pyruvate oxidoreductase		97	41	0	343	132	0	DIFFERENTIABLE	22
C4LVR9	C4LVR9_ENTHI	Glyceraldehyde-3-phosphate dehydrogenase, putative	EHI_187020	71	30	1	333	105	2	SUPERSET	80
S0AX11	S0AX11_ENTHI	Glyceraldehyde-3-phosphate dehydrogenase, putative		69	30	1	330	105	2	DIFFERENTIABLE	80
S0AYM0	S0AYM0_ENTHI	Actin, putative		80	32	3	316	148	19	DIFFERENTIABLE	123
S0B0T0	S0B0T0_ENTHI	Actin, putative		73	30	2	282	133	15	DIFFERENTIABLE	123
S0B1Y3	S0B1Y3_ENTHI	Actin		73	29	2	276	116	15	DIFFERENTIABLE	123
C4LU72	C4LU72_ENTHI	Myosin heavy chain	EHI_110180	100	37	1	226	73	1	DIFFERENTIABLE	61
C4LUV9	C4LUV9_ENTHI	Acetyl-CoA synthetase, putative	EHI_178960	61	23	0	208	65	0	DIFFERENTIABLE	60
Q07569	Q07569_ENTHI	Myosin heavy chain	mhcA	83	31	1	197	65	1	DIFFERENTIABLE	61
B1N306	B1N306_ENTHI	Elongation factor 2	EHI_166810	69	12	1	195	28	1	SUPERSET	120	C4M4N3
B1N2J0	B1N2J0_ENTHI	Malic enzyme, putative	EHI_050330	52	20	2	185	51	5	DIFFERENTIABLE	30
G5EKL5	G5EKL5_ENTHI	Malic enzyme	ME	48	18	2	174	45	5	DIFFERENTIABLE	30
C4LY85	C4LY85_ENTHI	Ubiquitin, putative	EHI_166800	11	4	1	173	16	1	SUPERSET	33	C4M760
S0AW44	S0AW44_ENTHI	Malic enzyme, putative		46	18	2	172	48	5	DIFFERENTIABLE	30
C4M192	C4M192_ENTHI	Phosphoglycerate kinase	EHI_188180	37	15	0	167	45	0	SUPERSET	318
C4M1E4	C4M1E4_ENTHI	Putative uncharacterized protein	EHI_030750	68	25	0	165	42	0	DIFFERENTIABLE	16
Q964D2	Q964D2_ENTHI	Gal/GalNAc lectin Igl1	igl1	42	45	0	161	152	0	DIFFERENTIABLE	71
C4LWQ8	C4LWQ8_ENTHI	Putative uncharacterized protein	EHI_198620	65	23	0	160	39	0	DIFFERENTIABLE	16
C4LY96	C4LY96_ENTHI	Putative uncharacterized protein	EHI_166920	69	20	0	159	28	0	DIFFERENTIABLE	16
S0AZU7	S0AZU7_ENTHI	Phosphoglycerate kinase		33	15	1	156	45	1	DIFFERENTIABLE	318
C4M3S5	C4M3S5_ENTHI	Heat shock protein 70, putative	EHI_052860	45	19	2	150	54	5	DIFFERENTIABLE	17
S0AWG4	S0AWG4_ENTHI	Elongation factor 1-alpha		38	21	1	150	86	3	DIFFERENTIABLE	36
C4M6Z7	C4M6Z7_ENTHI	Triosephosphate isomerase	EHI_056480	39	20	0	140	47	0	SUPERSET	53
C4LWS2	C4LWS2_ENTHI	Alcohol dehydrogenase 3, putative	EHI_198760	40	19	0	138	62	0	SUPERSET	142	Q24857
O15593	O15593_ENTHI	Actin		23	5	1	136	60	2	DIFFERENTIABLE	123
C4LXD7	C4LXD7_ENTHI	Fructose-1,6-bisphosphate aldolase, putative	EHI_098570	45	16	2	133	36	3	SUPERSET	3
S0AW68	S0AW68_ENTHI	Alcohol dehydrogenase 3, putative		38	18	0	126	54	0	DIFFERENTIABLE	142
C4LVY0	C4LVY0_ENTHI	Alcohol dehydrogenase, putative	EHI_125950	38	17	0	123	50	0	SUPERSET	485	S0AVS6, S0AX09, S0B069, S0B0T1
S0AWM3	S0AWM3_ENTHI	Alcohol dehydrogenase, putative		38	17	0	123	50	0	DIFFERENTIABLE	485
C4M6L0	C4M6L0_ENTHI	Gal/GalNAc lectin subunit Igl2	EHI_065330	36	31	0	123	125	0	DIFFERENTIABLE	71
S0AXA4	S0AXA4_ENTHI	Elongation factor 1-alpha		28	19	0	123	81	0	SUPERSET	36
S0AYR1	S0AYR1_ENTHI	Alcohol dehydrogenase 3, putative		37	18	0	121	57	0	DIFFERENTIABLE	142
S0AW50	S0AW50_ENTHI	Alcohol dehydrogenase 3, putative		37	17	0	121	54	0	DIFFERENTIABLE	142
S0B0R7	S0B0R7_ENTHI	Elongation factor 1-alpha		33	18	1	117	72	3	DIFFERENTIABLE	36
C4M3Q0	C4M3Q0_ENTHI	Peroxiredoxin	EHI_145840	31	27	1	98	124	4	DIFFERENTIABLE	280
C4LZN0	C4LZN0_ENTHI	Aspartyl-tRNA synthetase, putative	EHI_175050	39	1	0	96	2	0	DISCRETE	100
C4LVG4	C4LVG4_ENTHI	Actophorin, putative	EHI_197480	28	8	0	95	22	0	DISCRETE	281
C4MB38	C4MB38_ENTHI	Protein disulfide isomerase, putative	EHI_071590	29	35	1	93	180	1	EQUIVALENT	442	Q5XWD1
Q24835	Q24835_ENTHI	Galactose-specific adhesin 170kD subunit	hgl3	35	54	1	91	160	1	DIFFERENTIABLE	24
B1N3C7	B1N3C7_ENTHI	Galactose-inhibitable lectin 170 kDa subunit, putative	EHI_133900	33	55	1	90	166	1	SUPERSET	24	P32022
B1N5A8	B1N5A8_ENTHI	Peroxiredoxin	EHI_123390	26	23	1	90	116	4	SUPERSET	280
Q9NJW1	Q9NJW1_ENTHI	Grainin 2	grainin 2	24	33	0	90	201	0	SUPERSET	140
O15729	O15729_ENTHI	Peptidyl-prolyl cis-trans isomerase	CYP1	16	5	1	89	13	1	DISCRETE	308
B1N2F9	B1N2F9_ENTHI	Type A flavoprotein, putative	EHI_152650	27	10	0	83	27	0	SUPERSET	372	S0AWK7, S0B0Z9
C4LUM3	C4LUM3_ENTHI	NADP-dependent alcohol dehydrogenase	EHI_023110	21	7	0	82	16	0	SUPERSET	241	S0AXP2, S0AYE8
C4LTM0	C4LTM0_ENTHI	Gal/GalNAc lectin heavy subunit	EHI_012270	29	50	1	81	153	1	DIFFERENTIABLE	24
C4M213	C4M213_ENTHI	Malate dehydrogenase, putative	EHI_165350	26	7	0	81	12	0	SUPERSET	471	S0AXV8
C4LTW4	C4LTW4_ENTHI	2,3-bisphosphoglycerate-independent phosphoglycerate mutase, putative	EHI_050940	26	9	0	75	12	0	DIFFERENTIABLE	327
C4LZ72	C4LZ72_ENTHI	Filamin 2, putative	EHI_104630	33	1	0	70	2	0	DIFFERENTIABLE	224
B1N486	B1N486_ENTHI	Heat shock protein 70, putative	EHI_188610	21	9	2	69	28	5	SUPERSET	17	C4LZ45, C4M1G4, C4M9V9
C4M6H3	C4M6H3_ENTHI	NAD(FAD)-dependent dehydrogenase, putative	EHI_099700	30	4	0	67	4	0	DIFFERENTIABLE	293
Q869B1	Q869B1_ENTHI	Fe-hydrogenase, putative	EHI_005060	25	5	0	66	11	0	DISCRETE	314
C4M4P4	C4M4P4_ENTHI	Actin-binding protein, cofilin/tropomyosin family	EHI_168340	18	7	0	66	14	0	DISCRETE	398
C4LWU6	C4LWU6_ENTHI	Calponin homology domain protein, putative	EHI_199000	27	6	0	65	11	0	DIFFERENTIABLE	85
B1N4I3	B1N4I3_ENTHI	Putative uncharacterized protein	EHI_055400	30	22	0	64	67	0	DIFFERENTIABLE	467
P90545	P90545_ENTHI	EhABP	abp1	31	1	0	63	2	0	DIFFERENTIABLE	224
C4LYJ7	C4LYJ7_ENTHI	Galactokinase, putative	EHI_094100	21	10	1	61	30	2	DISCRETE	570
Q1EQ28	Q1EQ28_ENTHI	Clathrin heavy chain		26	61	0	59	192	0	DISCRETE	2
C4M770	C4M770_ENTHI	70 kDa heat shock protein, putative	EHI_199590	24	43	2	59	177	2	DIFFERENTIABLE	74
B1N309	B1N309_ENTHI	Rab GDP dissociation inhibitor alpha, putative	EHI_167060	20	6	0	59	16	0	SUPERSET	499
C4MB21	C4MB21_ENTHI	Profilin	EHI_176140	14	7	0	59	20	0	SUPERSET	34	P49230
O15581	O15581_ENTHI	Elongation factor 1 alpha		12	5	0	59	23	0	DIFFERENTIABLE	36
C4M8B5	C4M8B5_ENTHI	Putative uncharacterized protein	EHI_101240	29	2	0	58	3	0	DISCRETE	210
C4LU66	C4LU66_ENTHI	Phosphoglucomutase	PGM	27	3	0	57	4	0	EQUIVALENT	51	O15820
C4M5S9	C4M5S9_ENTHI	L-myo-inositol-1-phosphate synthase	EHI_070720	29	6	0	56	11	0	DIFFERENTIABLE	45
C4M1Y2	C4M1Y2_ENTHI	Rab GDP dissociation inhibitor alpha, putative	EHI_164890	19	6	0	56	16	0	DIFFERENTIABLE	499
O15601	O15601_ENTHI	Elongation factor 1 alpha		12	8	1	55	26	3	DIFFERENTIABLE	36
Q24813	Q24813_ENTHI	Nicotinamide nucleotide transhydrogenase		26	18	0	54	50	0	DIFFERENTIABLE	467
Q24802	Q24802_ENTHI	V-type ATPase, A subunit, putative	EHI_043010	20	19	0	54	77	0	DISCRETE	229
C4LVB2	C4LVB2_ENTHI	Heat shock protein 90, putative	EHI_196940	24	2	0	53	3	0	SUPERSET	251	C4MBP1
Q76N78	Q76N78_ENTHI	Profilin		14	6	0	53	16	0	DIFFERENTIABLE	34
Q27648	Q27648_ENTHI	Hexokinase	HXK2	18	3	0	52	5	0	DIFFERENTIABLE	18
O77164	O77164_ENTHI	70 kDa heat shock protein Hsp70-Bip	BiP	21	37	2	50	142	2	DIFFERENTIABLE	74
C4M3P6	C4M3P6_ENTHI	Putative uncharacterized protein	EHI_140740	20	2	0	50	3	0	DIFFERENTIABLE	115
C4LYM3	C4LYM3_ENTHI	Putative uncharacterized protein	EHI_118750	11	4	0	48	14	0	DISCRETE	422
C4M0F4	C4M0F4_ENTHI	14-3-3 protein 3	EHI_006810	18	5	1	47	11	4	DIFFERENTIABLE	96
C4LWF5	C4LWF5_ENTHI	LIM zinc finger domain containing protein	EHI_096420	12	2	0	46	4	0	DISCRETE	463
C4M2Y7	C4M2Y7_ENTHI	Purine nucleoside phosphorylase, putative	EHI_048740	21	4	0	45	8	0	DISCRETE	78
C4M2S3	C4M2S3_ENTHI	Putative uncharacterized protein	EHI_161070	17	3	0	45	8	0	EQUIVALENT	128	S0AUR0
Q27647	Q27647_ENTHI	Hexokinase	HXK1	17	4	0	45	7	0	SUPERSET	18	S0AW62, S0AWG9
C4M0S1	C4M0S1_ENTHI	Xaa-Pro dipeptidase, putative	EHI_010070	20	3	0	44	4	0	DIFFERENTIABLE	681
C4LVD3	C4LVD3_ENTHI	Sulfate adenylyltransferase, putative	EHI_197160	20	6	2	43	11	2	SUPERSET	369	O76156
C4M4H1	C4M4H1_ENTHI	Aminoacyl-histidine dipeptidase, putative	EHI_042170	16	10	0	43	14	0	DIFFERENTIABLE	356
O15603	O15603_ENTHI	NADH dependent alcohol dehydrogenase		10	5	0	43	21	0	DIFFERENTIABLE	142
Q24861	Q24861_ENTHI	20 kDa antigen		16	3	0	42	6	0	DIFFERENTIABLE	175
C4M7M1	C4M7M1_ENTHI	Purine nucleoside phosphorylase, putative	EHI_200080	15	2	0	42	4	0	DISCRETE	8
C4M126	C4M126_ENTHI	Putative uncharacterized protein	EHI_105210	17	2	0	41	5	0	DISCRETE	212
C4LWT9	C4LWT9_ENTHI	Actin, putative	EHI_198930	15	3	0	40	4	0	SUPERSET	468	S0AWV9
C4M782	C4M782_ENTHI	ARP2/3 complex 34 kDa subunit, putative	EHI_091250	12	2	0	40	4	0	DIFFERENTIABLE	521
C4LXT9	C4LXT9_ENTHI	Endoribonuclease L-PSP, putative	EHI_087570	15	3	0	39	5	0	DISCRETE	646
C4M5A0	C4M5A0_ENTHI	40S ribosomal protein SA	EHI_081410	16	1	0	38	3	0	SUPERSET	221
C4M9S5	C4M9S5_ENTHI	Adenylate kinase	EHI_135470	15	7	0	38	14	0	SUPERSET	265	O96907
C4LX20	C4LX20_ENTHI	Superoxide dismutase	EHI_159160	9	6	0	38	14	0	SUPERSET	575	P34107
C4M5I6	C4M5I6_ENTHI	Actin-like protein, putative	EHI_111050	19	7	0	37	13	0	SUPERSET	812	S0AWX7
C4M5C4	C4M5C4_ENTHI	Enhancer binding protein-1	EHI_121780	19	4	0	37	6	0	SUPERSET	298
C4M818	C4M818_ENTHI	Transketolase, putative	EHI_002160	16	9	0	37	21	0	SUPERSET	166
S0AZN9	S0AZN9_ENTHI	40S ribosomal protein SA		15	1	0	37	3	0	DIFFERENTIABLE	221
C4M7X2	C4M7X2_ENTHI	Lysine--tRNA ligase	EHI_047810	22	1	0	36	2	0	DIFFERENTIABLE	409
C4M946	C4M946_ENTHI	Putative uncharacterized protein	EHI_083620	19	8	0	36	13	0	DISCRETE	125
C4LU56	C4LU56_ENTHI	60S ribosomal protein L5, putative	EHI_006860	18	2	0	36	2	0	DIFFERENTIABLE	32
C4M295	C4M295_ENTHI	Adenylyl cyclase-associated protein	EHI_136150	14	3	0	36	7	0	DIFFERENTIABLE	347
C4LV11	C4LV11_ENTHI	Putative uncharacterized protein	EHI_092490	17	0	0	35	0	0	DISCRETE	346
C4LYI1	C4LYI1_ENTHI	DEAD/DEAH box helicase, putative	EHI_093900	16	3	0	35	3	0	DISCRETE	300
C4LZC2	C4LZC2_ENTHI	Pyrophosphate-dependent phosphofructokinase	EHI_000730	14	3	0	34	5	0	SUPERSET	380	S0AWD4
C4M5V0	C4M5V0_ENTHI	Thioredoxin	EHI_026340	11	12	0	34	51	0	DIFFERENTIABLE	442
C4LU42	C4LU42_ENTHI	Putative uncharacterized protein	EHI_068510	18	1	0	33	1	0	DISCRETE	6
S0AYK4	S0AYK4_ENTHI	Grainin 1		14	32	0	33	281	0	DIFFERENTIABLE	88
C4M6L6	C4M6L6_ENTHI	Rho GDP exchange inhibitor, putative	EHI_147570	12	2	0	33	3	0	DIFFERENTIABLE	114
S0AZP0	S0AZP0_ENTHI	Uncharacterized protein		10	2	0	33	2	0	DIFFERENTIABLE	819
C4M2R6	C4M2R6_ENTHI	Uncharacterized protein	EHI_160980	10	2	0	33	2	0	SUPERSET	819	S0AWH5, S0AXD7, S0B021, S0B0U6
C4M6R1	C4M6R1_ENTHI	Alcohol dehydrogenase, putative	EHI_088020	14	4	0	32	11	0	DIFFERENTIABLE	142
C4M3I0	C4M3I0_ENTHI	Phosphorylase	EHI_138380	13	2	0	32	4	0	DIFFERENTIABLE	216
C4LWJ6	C4LWJ6_ENTHI	LIM zinc finger domain containing protein	EHI_069060	9	0	0	32	0	0	DISCRETE	151
Q8WQT5	Q8WQT5_ENTHI	Phosphorylase		13	2	0	30	4	0	DIFFERENTIABLE	216
C4M882	C4M882_ENTHI	Uncharacterized protein	EHI_098800	12	6	0	30	9	0	DISCRETE	679
Q9UAB5	Q9UAB5_ENTHI	Grainin 1	grainin 1	11	27	0	30	189	0	DIFFERENTIABLE	88
C4LWW4	C4LWW4_ENTHI	Methionine aminopeptidase 2	EHI_126880	10	1	0	30	1	0	DISCRETE	650
C4LZW4	C4LZW4_ENTHI	LIM zinc finger domain containing protein	EHI_194520	10	1	0	30	2	0	DIFFERENTIABLE	730
C4LV07	C4LV07_ENTHI	Malate dehydrogenase, putative	EHI_092450	7	0	0	30	0	0	DIFFERENTIABLE	636
C4LT49	C4LT49_ENTHI	40S ribosomal protein S24, putative	EHI_148820	11	0	0	29	0	0	EQUIVALENT	472	C4M549
C4M6Y2	C4M6Y2_ENTHI	Polyadenylate-binding protein, putative	EHI_033250	16	3	1	28	5	1	EQUIVALENT	294	S0AYB2
Q5NT41	Q5NT41_ENTHI	Small GTPase EhRabC3	EhRabC3	12	5	0	28	11	0	DIFFERENTIABLE	103
S0B1X1	S0B1X1_ENTHI	Uncharacterized protein		10	0	1	28	0	5	DIFFERENTIABLE	260
C4LTS5	C4LTS5_ENTHI	Uncharacterized protein	EHI_050520	9	6	0	28	19	0	EQUIVALENT	173	S0AWI2
C4LXK4	C4LXK4_ENTHI	Fe-hydrogenase, putative	EHI_073390	14	8	0	27	13	0	SUPERSET	400	Q9GTX0, S0AXI4
B1N336	B1N336_ENTHI	40S ribosomal protein S4, putative	EHI_118170	11	1	1	27	2	1	SUPERSET	500	C4LYF4, S0AVH8, S0AZM5
B1N3R9	B1N3R9_ENTHI	60S ribosomal protein L7a, putative	EHI_169360	10	0	0	27	0	0	SUPERSET	48	C4LVH6
C4M0A8	C4M0A8_ENTHI	Putative uncharacterized protein	EHI_005150	16	0	0	26	0	0	DISCRETE	182
B1N368	B1N368_ENTHI	Putative uncharacterized protein	EHI_065490	14	2	1	26	4	1	DISCRETE	118
C4M711	C4M711_ENTHI	Putative uncharacterized protein	EHI_189930	9	2	1	26	2	1	DISCRETE	202
C4M296	C4M296_ENTHI	Calreticulin, putative	EHI_136160	14	16	0	25	56	0	DISCRETE	189
C4M7W2	C4M7W2_ENTHI	Aldose reductase, putative	EHI_029620	12	3	0	25	4	0	SUPERSET	49
C4M8C2	C4M8C2_ENTHI	Aldose reductase, putative	EHI_039190	12	3	0	25	4	0	DIFFERENTIABLE	49
B1N2S4	B1N2S4_ENTHI	WD repeat protein 2, putative	EHI_142190	10	3	0	25	5	0	SUPERSET	723	C4LZ00
C4LXG4	C4LXG4_ENTHI	Purine nucleoside phosphorylase, putative	EHI_130960	10	3	0	25	5	0	SUPERSET	557	S0AXJ9, S0AXL9
C4LVQ1	C4LVQ1_ENTHI	Actin-binding protein, cofilin/tropomyosin family	EHI_186840	9	4	0	25	14	0	DISCRETE	261
C4LYR0	C4LYR0_ENTHI	Thioredoxin	EHI_004490	9	2	0	25	3	0	DISCRETE	338
C4M0Q2	C4M0Q2_ENTHI	40S ribosomal protein S8	EHI_053190	12	0	0	24	0	0	SUPERSET	312	C4M8Y8, S0AWP6
C4M727	C4M727_ENTHI	60S ribosomal protein L27, putative	EHI_183480	11	0	0	24	0	0	DIFFERENTIABLE	341
C4M030	C4M030_ENTHI	Rubrerythrin, putative	EHI_134810	10	1	0	24	1	0	DISCRETE	498
C4LW95	C4LW95_ENTHI	Thioredoxin reductase	EHI_155440	9	3	0	24	4	0	SUPERSET	405
C4LU18	C4LU18_ENTHI	Adenosylhomocysteinase	EHI_068250	12	24	0	23	72	0	DISCRETE	204
C4LW30	C4LW30_ENTHI	RNA modification enzymes, MiaB-family	EHI_141830	12	0	0	23	0	0	DISCRETE	291
C4LUC7	C4LUC7_ENTHI	Unconventional myosin IB	EHI_110810	11	0	0	23	0	0	DIFFERENTIABLE	278
C4M7H1	C4M7H1_ENTHI	Actobindin, putative	EHI_158570	10	0	0	23	0	0	DIFFERENTIABLE	163
B1N2I3	B1N2I3_ENTHI	40S ribosomal protein S14, putative	EHI_074090	10	3	0	23	4	0	DIFFERENTIABLE	296
C4LZB0	C4LZB0_ENTHI	40S ribosomal protein S6	EHI_000590	8	0	0	23	0	0	SUPERSET	79	S0AWS4, S0AWU9, S0AZ56
C4M7K9	C4M7K9_ENTHI	Thioredoxin	EHI_170420	6	5	0	23	27	0	DIFFERENTIABLE	442
Q1EQ51	Q1EQ51_ENTHI	EhSec31	EHI_103410	13	3	0	22	5	0	DISCRETE	117
C4M5Q7	C4M5Q7_ENTHI	Rho family GTPase	EHI_129750	12	5	0	22	7	0	DIFFERENTIABLE	5
C4LYR5	C4LYR5_ENTHI	Putative uncharacterized protein	EHI_004550	10	1	0	22	2	0	DIFFERENTIABLE	343
C4LZM7	C4LZM7_ENTHI	Peptidase, putative	EHI_175020	10	1	0	22	1	0	DIFFERENTIABLE	712
C4LVZ9	C4LVZ9_ENTHI	60S ribosomal protein L9, putative	EHI_126140	10	2	0	22	4	0	DIFFERENTIABLE	322
C4M9B0	C4M9B0_ENTHI	60S ribosomal protein L9, putative	EHI_193080	10	3	0	22	6	0	DIFFERENTIABLE	322
C4LT47	C4LT47_ENTHI	Gal/GalNAc lectin light subunit	EHI_148790	10	16	0	22	63	0	DIFFERENTIABLE	283
C4LZ50	C4LZ50_ENTHI	Actin binding protein, putative	EHI_104390	9	0	1	22	0	1	SUPERSET	297	O76753
C4LZ12	C4LZ12_ENTHI	Tyrosyl-tRNA synthetase, putative	EHI_009240	9	0	0	22	0	0	DISCRETE	75
C4M5Z7	C4M5Z7_ENTHI	Rho family GTPase	EHI_181250	9	4	0	22	12	0	SUPERSET	5	C4M8K6, Q24814
C4LVN8	C4LVN8_ENTHI	Translation initiation factor eIF-5A, putative	EHI_186480	6	4	0	22	5	0	DIFFERENTIABLE	137
C4LYU0	C4LYU0_ENTHI	Tubulin alpha chain, putative	EHI_010530	14	1	0	21	1	0	EQUIVALENT	488	S0AX28
C4LT02	C4LT02_ENTHI	40S ribosomal protein S3, putative	EHI_146340	13	3	0	21	5	0	EQUIVALENT	179	S0AZJ3
C4LV48	C4LV48_ENTHI	Enhancer binding protein-2, putative	EHI_182670	12	1	0	21	2	0	DIFFERENTIABLE	64
C4M9P2	C4M9P2_ENTHI	Filopodin, putative	EHI_080740	11	6	1	21	9	1	DIFFERENTIABLE	40
C4LSV0	C4LSV0_ENTHI	ARP2/3 complex 20 kDa subunit, putative	EHI_152660	10	0	0	21	0	0	DISCRETE	302
B1N2Z3	B1N2Z3_ENTHI	60S acidic ribosomal protein P0, putative	EHI_148850	10	0	0	21	0	0	SUPERSET	112	S0AW70, S0AYC4, S0AZC9, S0B010, S0B2A3, S0B2T7
C4M1P6	C4M1P6_ENTHI	Glutaminyl-tRNA synthetase, putative	EHI_062700	10	1	0	21	2	0	DISCRETE	695
C4M332	C4M332_ENTHI	LIM zinc finger domain containing protein	EHI_025450	10	0	0	21	0	0	DISCRETE	608
C4M2K7	C4M2K7_ENTHI	Methionyl-tRNA synthetase, putative	EHI_079860	10	1	0	21	2	0	DIFFERENTIABLE	409
O15635	O15635_ENTHI	Cysteine synthase A, putative	cysteine synthase type II	9	2	0	21	2	0	SUPERSET	822	S0AX08
C4M7U0	C4M7U0_ENTHI	40S ribosomal protein S2, putative	EHI_020280	9	4	0	21	7	0	SUPERSET	401	S0AVL0
C4M1X3	C4M1X3_ENTHI	Cysteine protease binding protein family 1	cpbf1	9	8	0	21	16	0	DISCRETE	222
C4M8B0	C4M8B0_ENTHI	Ras family GTPase	EHI_058090	7	6	0	21	16	0	SUPERSET	532
C4LYN2	C4LYN2_ENTHI	Fibrillarin, putative	EHI_118840	7	1	0	21	1	0	EQUIVALENT	632	S0AY23
C4M0Z2	C4M0Z2_ENTHI	40S ribosomal protein S17, putative	EHI_135060	6	0	0	21	0	0	SUPERSET	366
C4LZB2	C4LZB2_ENTHI	Nucleotide binding protein 2, putative	EHI_000610	6	0	0	21	0	0	DISCRETE	66
C4M384	C4M384_ENTHI	Starch branching enzyme, putative	EHI_106090	13	0	0	20	0	0	DIFFERENTIABLE	304
C4M2N0	C4M2N0_ENTHI	Tubulin alpha chain, putative	EHI_005950	12	1	0	20	1	0	EQUIVALENT	488	P31017
C4M943	C4M943_ENTHI	Coronin	EHI_083590	12	1	0	20	1	0	DIFFERENTIABLE	642
C4LT26	C4LT26_ENTHI	4-alpha-glucanotransferase, putative	EHI_148560	11	8	0	20	10	0	DIFFERENTIABLE	185
Q5NT05	Q5NT05_ENTHI	Rab family GTPase	EhRabX11	11	5	0	20	10	0	DISCRETE	415
C4LZ95	C4LZ95_ENTHI	UDP-glucose pyrophosphorylase, putative	EHI_000440	11	0	0	20	0	0	DISCRETE	624
C4LXB1	C4LXB1_ENTHI	14-3-3 protein 2	EHI_098280	10	2	0	20	4	0	SUPERSET	96
C4LSS0	C4LSS0_ENTHI	Arginase, putative	EHI_152330	10	1	0	20	1	0	DISCRETE	345
C4LV24	C4LV24_ENTHI	Seryl-tRNA synthetase, putative	EHI_092640	9	0	0	20	0	0	DIFFERENTIABLE	555
C4LVZ6	C4LVZ6_ENTHI	40S ribosomal protein S5, putative	EHI_200850	9	1	0	20	2	0	DIFFERENTIABLE	550
O00851	O00851_ENTHI	Unconventional myosin IB		9	0	0	20	0	0	DIFFERENTIABLE	278
C4LWQ7	C4LWQ7_ENTHI	Putative uncharacterized protein	EHI_198610	6	0	0	20	0	0	DISCRETE	693
C4LYB3	C4LYB3_ENTHI	Filopodin, putative	EHI_167130	14	0	1	19	0	1	DISCRETE	527
Q4VSM4	Q4VSM4_ENTHI	Vacuolar ATPase subunit B	EHI_189850	13	27	0	19	121	0	DIFFERENTIABLE	205
Q86S08	Q86S08_ENTHI	Malate dehydrogenase	Mdh1	10	2	0	19	6	0	DIFFERENTIABLE	145
C4M220	C4M220_ENTHI	Aspartate ammonia-lyase, putative	EHI_150390	10	2	0	19	9	0	DIFFERENTIABLE	231
C4LVI7	C4LVI7_ENTHI	Cortexillin II, putative	EHI_103430	10	1	0	19	1	0	DISCRETE	612
C4LUK9	C4LUK9_ENTHI	LIM zinc finger domain containing protein	EHI_022960	8	0	0	19	0	0	DISCRETE	759
B1N3Y5	B1N3Y5_ENTHI	Bifunctional short chain isoprenyl diphosphate synthase, putative	EHI_142720	8	2	0	19	3	0	SUPERSET	578	C4M111
C4LX42	C4LX42_ENTHI	TolA protein, putative	EHI_159620	8	1	0	19	1	0	DIFFERENTIABLE	343
C4M1M6	C4M1M6_ENTHI	Thioredoxin, putative	EHI_133970	7	20	0	19	58	0	DISCRETE	50
C4LU80	C4LU80_ENTHI	LIM zinc finger domain containing protein	EHI_110280	6	0	0	19	0	0	DISCRETE	354
C4M3Z6	C4M3Z6_ENTHI	Phosphoglucomutase/phosphomannomutase family protein	EHI_185280	11	1	0	18	1	0	DISCRETE	39
C4LUI9	C4LUI9_ENTHI	Threonine dehydratase, putative	EhTD2	10	2	0	18	3	0	DIFFERENTIABLE	139
C4M3R5	C4M3R5_ENTHI	Dynamin-like protein	EHI_052740	10	1	0	18	1	0	DISCRETE	796
Q5NT27	Q5NT27_ENTHI	Small GTPase EhRab2C	EhRab2C	9	4	0	18	10	0	DIFFERENTIABLE	164
C4M2X6	C4M2X6_ENTHI	Actin, putative	EHI_048630	9	0	0	18	0	0	DIFFERENTIABLE	947
C4LZK9	C4LZK9_ENTHI	Glucosamine-6-phosphate isomerase, putative	EHI_174640	8	0	0	18	0	0	DISCRETE	295
C4MBJ7	C4MBJ7_ENTHI	Copine, putative	EHI_163260	8	10	0	18	36	0	DIFFERENTIABLE	42
C4M3N6	C4M3N6_ENTHI	F-actin capping protein alpha subunit, putative	EHI_033740	7	2	0	18	5	0	DISCRETE	743
C4M1I7	C4M1I7_ENTHI	LIM zinc finger domain containing protein	EHI_001070	7	0	0	18	0	0	DISCRETE	424
C4M9I2	C4M9I2_ENTHI	SH3 domain protein	EHI_187770	6	0	0	18	0	0	EQUIVALENT	358	S0AXC8
C4M7F5	C4M7F5_ENTHI	Alcohol dehydrogenase, putative	EHI_166490	10	9	0	17	19	0	DIFFERENTIABLE	434
C4LT81	C4LT81_ENTHI	40S ribosomal protein S5, putative	EHI_137870	9	2	0	17	3	0	DIFFERENTIABLE	550
C4M323	C4M323_ENTHI	14-3-3 protein 1	EHI_025360	9	0	0	17	0	0	SUPERSET	96	P42648
C4M9F9	C4M9F9_ENTHI	40S ribosomal protein S7, putative	EHI_067530	9	0	0	17	0	0	DIFFERENTIABLE	303
Q9BLE4	Q9BLE4_ENTHI	Small GTPase Rab11B	EhRab11B	9	6	1	17	7	1	DIFFERENTIABLE	299
C4LZ42	C4LZ42_ENTHI	40S ribosomal protein S18, putative	EHI_009680	8	1	0	17	1	0	SUPERSET	218
C4M1E1	C4M1E1_ENTHI	60S ribosomal protein L12, putative	EHI_191750	8	1	0	17	2	0	DIFFERENTIABLE	887
C4M8Y1	C4M8Y1_ENTHI	Putative uncharacterized protein	EHI_080260	8	0	0	17	0	0	DIFFERENTIABLE	762
C4M5C6	C4M5C6_ENTHI	Deoxyribose-phosphate aldolase, putative	EHI_121800	8	1	0	17	2	0	DIFFERENTIABLE	252
Q5NT28	Q5NT28_ENTHI	Small GTPase EhRab2B	EhRab2B	8	4	0	17	10	0	DIFFERENTIABLE	164
C4LYJ9	C4LYJ9_ENTHI	ARP2/3 complex 41 kDa subunit, putative	EHI_094120	7	2	0	17	3	0	SUPERSET	232	S0AVM3
Q01958	CPP2_ENTHI	Histolysain	CPP2	7	16	0	17	58	0	SUPERSET	195	S0AUZ1, S0AW34, S0AWK6, S0AXH6, S0AYW8
S0AVS1	S0AVS1_ENTHI	40S ribosomal protein S2, putative		7	3	0	17	4	0	DIFFERENTIABLE	401
C4LSM2	C4LSM2_ENTHI	Translation initiation factor eIF-5A, putative	EHI_151810	6	0	0	17	0	0	DIFFERENTIABLE	137
C4MBE2	C4MBE2_ENTHI	EF-hand calcium-binding domain containing protein	EHI_060740	6	8	1	17	72	4	SUPERSET	699	Q9GSV7
C4M5N2	C4M5N2_ENTHI	Nucleolar protein Nop56, putative	EHI_122740	6	0	0	17	0	0	DISCRETE	638
C4MAR5	C4MAR5_ENTHI	RAD23 protein, putative	EHI_001400	6	1	0	17	1	0	DIFFERENTIABLE	262
C4LY07	C4LY07_ENTHI	Ras GTPase activating protein, putative	EHI_035800	10	1	0	16	1	0	DISCRETE	832
C4LT17	C4LT17_ENTHI	Aspartate--ammonia ligase, putative	EHI_148470	10	2	0	16	2	0	DISCRETE	662
C4M0L4	C4M0L4_ENTHI	Aminopeptidase, putative	EHI_008380	9	3	0	16	6	0	DISCRETE	503
C4LXM0	C4LXM0_ENTHI	40S ribosomal protein S15a, putative	EHI_105140	9	2	0	16	5	0	DISCRETE	892
C4LYS4	C4LYS4_ENTHI	Vesicle-fusing ATPase, putative	EHI_004640	9	0	1	16	0	1	DIFFERENTIABLE	70
C4M3R7	C4M3R7_ENTHI	TolA-like protein, putative	EHI_052780	8	0	0	16	0	0	EQUIVALENT	343	S0AYC0
S0AZA2	S0AZA2_ENTHI	Copine, putative		7	10	0	16	31	0	DIFFERENTIABLE	42
B1N2Q5	B1N2Q5_ENTHI	Actin-related protein 2/3 complex subunit 5	EHI_103440	7	0	0	16	0	0	DISCRETE	157
C4LSR1	C4LSR1_ENTHI	40S ribosomal protein S27	EHI_152230	7	0	0	16	0	0	DIFFERENTIABLE	258
C4LYP1	C4LYP1_ENTHI	LIM zinc finger domain containing protein	EHI_004170	7	0	0	16	0	0	DISCRETE	885
C4LZL6	C4LZL6_ENTHI	ARP2/3 complex 21 kDa subunit, putative	EHI_174910	6	0	0	16	0	0	DIFFERENTIABLE	1039
C4LVJ5	C4LVJ5_ENTHI	Ubiquitin-like, putative	EHI_103510	6	0	0	16	0	0	DISCRETE	161
Q24834	Q24834_ENTHI	Disulphide oxidoreductase	gEh-34 KDa protein	6	3	1	16	4	1	DIFFERENTIABLE	405
Q8MZT6	Q8MZT6_ENTHI	Gal/GalNAc lectin heavy subunit region C	hgl	6	10	0	16	28	0	DIFFERENTIABLE	24
C4MB22	C4MB22_ENTHI	Ribose 5-phosphate isomerase, putative	EHI_176150	5	0	0	16	0	0	DISCRETE	995
C4M7Y2	C4M7Y2_ENTHI	Eukaryotic translation elongation factor 1 gamma, putative	EHI_119540	4	1	0	16	2	0	DIFFERENTIABLE	57
C4LW65	C4LW65_ENTHI	Uncharacterized protein	EHI_142210	8	0	0	15	0	0	DISCRETE	1053
B1N341	B1N341_ENTHI	Cortexillin, putative	EHI_104560	8	3	0	15	3	0	DIFFERENTIABLE	469
C4LYP7	C4LYP7_ENTHI	Guanine nucleotide regulatory protein, putative	EHI_004230	8	0	0	15	0	0	EQUIVALENT	466	S0AY13, S0AZI0
C4M8M8	C4M8M8_ENTHI	Putative uncharacterized protein	EHI_114330	8	0	0	15	0	0	DISCRETE	305
C4M3S9	C4M3S9_ENTHI	90 kDa heat shock protein, putative	EHI_163480	8	12	0	15	25	0	DISCRETE	454
C4LSV1	C4LSV1_ENTHI	Malate dehydrogenase	EHI_152670	7	2	0	15	6	0	DIFFERENTIABLE	145
C4MB71	C4MB71_ENTHI	19S cap proteasome S2 subunit	EHI_198010	7	5	0	15	6	0	DIFFERENTIABLE	518
B1N2I7	B1N2I7_ENTHI	60S ribosomal protein L10a, putative	EHI_135790	7	1	0	15	1	0	DIFFERENTIABLE	700
C4LSK1	C4LSK1_ENTHI	Helicase, putative	EHI_151600	7	0	0	15	0	0	DIFFERENTIABLE	367
C4M8E1	C4M8E1_ENTHI	Centromere/microtubule binding protein cbf5, putative	EHI_115300	7	1	0	15	2	0	DISCRETE	287
C4LTB5	C4LTB5_ENTHI	Actin-related protein 2/3 complex subunit 1A, putative	EHI_045000	6	2	0	15	3	0	DIFFERENTIABLE	232
C4MAZ9	C4MAZ9_ENTHI	N-acetylmuraminidase, putative	EHI_176820	6	11	0	15	33	0	DISCRETE	698
S0AXW2	S0AXW2_ENTHI	Cysteine proteinase 2		6	15	0	15	51	0	DIFFERENTIABLE	195
C4LZS3	C4LZS3_ENTHI	Actobindin, putative	EHI_039020	6	0	0	15	0	0	DIFFERENTIABLE	163
B1N5A6	B1N5A6_ENTHI	Putative uncharacterized protein	EHI_154450	6	2	0	15	3	0	DISCRETE	697
C4LVV2	C4LVV2_ENTHI	PIWI, putative	EHI_125650	10	1	0	14	1	0	DISCRETE	147
C4M0W8	C4M0W8_ENTHI	Putative uncharacterized protein	EHI_015300	9	0	0	14	0	0	DIFFERENTIABLE	340
Q9BLF3	Q9BLF3_ENTHI	Small GTPase Rab1A	EhRab1A	8	4	0	14	6	0	DIFFERENTIABLE	277
B1N316	B1N316_ENTHI	40S ribosomal protein S16, putative	EHI_131190	8	1	0	14	1	0	EQUIVALENT	43	C4M2R7
B1N3K9	B1N3K9_ENTHI	40S ribosomal protein S7, putative	EHI_140540	8	0	0	14	0	0	DIFFERENTIABLE	303
C4LUW3	C4LUW3_ENTHI	40S ribosomal protein S9	EHI_179000	7	1	0	14	2	0	EQUIVALENT	97	O15612, S0AV16
C4M067	C4M067_ENTHI	Thioredoxin, putative	EHI_021560	7	16	0	14	67	0	DIFFERENTIABLE	591
C4M2U3	C4M2U3_ENTHI	Uncharacterized protein	EHI_188760	7	0	0	14	0	0	DIFFERENTIABLE	154
Q6SCK6	Q6SCK6_ENTHI	Mitogen-activated protein kinase	EHI_073650	7	0	0	14	0	0	SUPERSET	363	S0AYE4
Q9BLF2	Q9BLF2_ENTHI	Small GTPase RabC1	EhRabC1	7	5	0	14	8	0	DIFFERENTIABLE	103
Q5NT23	Q5NT23_ENTHI	Small GTPase EhRabK1	EhRabK1	7	1	0	14	4	0	DISCRETE	820
Q1EPY2	Q1EPY2_ENTHI	EhVps45A	EHI_160900	6	3	0	14	4	0	DIFFERENTIABLE	87
Q9BLE8	Q9BLE8_ENTHI	Small GTPase Rab7A	EhRab7A	4	2	2	14	4	2	SUPERSET	188	Q9NHW8
C4M049	C4M049_ENTHI	Aminopeptidase, putative	EHI_021340	8	0	0	13	0	0	DISCRETE	640
C4LXL0	C4LXL0_ENTHI	Glycyl-tRNA synthetase, putative	EHI_073460	8	0	0	13	0	0	DISCRETE	247
C4LXL1	C4LXL1_ENTHI	ADP-ribosylation factor 1, putative	EHI_137720	8	0	0	13	0	0	DIFFERENTIABLE	491
C4LUJ0	C4LUJ0_ENTHI	Beta-tubulin, putative	EHI_049920	7	1	0	13	1	0	DIFFERENTIABLE	180
C4MA09	C4MA09_ENTHI	60S ribosomal protein L7, putative	EHI_146530	7	1	0	13	2	0	SUPERSET	342	S0AXE0
C4M483	C4M483_ENTHI	G protein alpha subunit, putative	EHI_140350	7	3	0	13	4	0	DISCRETE	133
C4LXX7	C4LXX7_ENTHI	40S ribosomal protein S13, putative	EHI_035460	7	1	0	13	2	0	EQUIVALENT	330	C4M9M7
B1N3L7	B1N3L7_ENTHI	ENTH domain protein, putative	EHI_052870	6	0	0	13	0	0	DIFFERENTIABLE	19
C4M6S2	C4M6S2_ENTHI	60S ribosomal protein L14, putative	EHI_184470	5	2	1	13	3	2	SUPERSET	768	C4M8C9
C4LZG9	C4LZG9_ENTHI	60S ribosomal protein L11, putative	EHI_199970	5	1	0	13	3	0	EQUIVALENT	437	C4LZP2
C4M779	C4M779_ENTHI	Putative uncharacterized protein	EHI_199660	5	4	0	13	8	0	DISCRETE	233
C4LV69	C4LV69_ENTHI	60S ribosomal protein L21, putative	EHI_161180	5	1	0	13	1	0	EQUIVALENT	920	C4LWK0, P38653
C4LWG9	C4LWG9_ENTHI	Lysozyme, putative	EHI_096570	4	5	0	13	24	0	EQUIVALENT	519	O97368
C4LX69	C4LX69_ENTHI	Dihydropyrimidine dehydrogenase, putative	EHI_012980	8	0	0	12	0	0	DISCRETE	580
C4LSY9	C4LSY9_ENTHI	Ran family GTPase	EHI_148190	8	3	0	12	6	0	DISCRETE	58
Q86R89	Q86R89_ENTHI	NifU		7	1	0	12	1	0	EQUIVALENT	92	Q8MU40
C4LZ47	C4LZ47_ENTHI	Nucleoside diphosphate kinase, putative	EHI_104360	7	0	0	12	0	0	DISCRETE	607
C4LXZ0	C4LXZ0_ENTHI	60S ribosomal protein L18a	EHI_090020	7	1	0	12	1	0	DISCRETE	267
C4LZP6	C4LZP6_ENTHI	40S ribosomal protein S16, putative	EHI_038620	7	1	0	12	1	0	DIFFERENTIABLE	43
C4M032	C4M032_ENTHI	NAD synthetase, putative	EHI_134830	7	0	0	12	0	0	EQUIVALENT	653	S0AX24
B1N4Q6	B1N4Q6_ENTHI	26S protease regulatory subunit 7, putative	EHI_080890	7	1	0	12	1	0	EQUIVALENT	382	S0AX32
Q1EQ46	Q1EQ46_ENTHI	EhSec24C	EHI_048310	6	0	0	12	0	0	DISCRETE	20
C4M8Z5	C4M8Z5_ENTHI	Putative uncharacterized protein	EHI_086690	6	1	1	12	1	1	EQUIVALENT	343	S0AZA1
C4M8K8	C4M8K8_ENTHI	Heat shock protein 70, putative	EHI_197860	6	0	0	12	0	0	DISCRETE	845
C4LVP4	C4LVP4_ENTHI	Actin-binding protein, cofilin/tropomyosin family	EHI_186770	6	0	0	12	0	0	EQUIVALENT	172	S0AYP5
C4LUP7	C4LUP7_ENTHI	Alpha-amylase family protein	EHI_023360	6	19	0	12	45	0	DIFFERENTIABLE	152
C4LWX8	C4LWX8_ENTHI	Putative uncharacterized protein	EHI_127030	6	4	0	12	6	0	DISCRETE	289
C4LYI8	C4LYI8_ENTHI	Putative uncharacterized protein	EHI_093970	6	6	0	12	13	0	DISCRETE	82
C4LUQ9	C4LUQ9_ENTHI	Calmodulin, putative	EHI_023500	5	3	0	12	5	0	DISCRETE	41
P36185	ACP2_ENTHI	Cysteine proteinase ACP2	ACP2	5	10	0	12	28	0	DIFFERENTIABLE	195
C4LUL4	C4LUL4_ENTHI	Proteasome subunit alpha type	EHI_004760	5	3	0	12	6	0	EQUIVALENT	1143	Q94561, S0AWH2
C4M7C6	C4M7C6_ENTHI	Uncharacterized protein	EHI_007350	5	0	0	12	0	0	DISCRETE	523
C4M1Q5	C4M1Q5_ENTHI	Thioredoxin, putative	EHI_062790	4	0	0	12	0	0	DISCRETE	554
Q24804	Q24804_ENTHI	Rap homologue 1	EhRAP1	4	4	0	12	12	0	DIFFERENTIABLE	532
S0B1T5	S0B1T5_ENTHI	Alcohol dehydrogenase, putative		9	9	0	11	18	0	DIFFERENTIABLE	434
C4LWJ2	C4LWJ2_ENTHI	Phosphorylase	EHI_096830	8	3	0	11	6	0	DIFFERENTIABLE	216
Q76KF5	Q76KF5_ENTHI	D-phosphoglycerate dehydrogenase	EhPGDH	8	0	0	11	0	0	DIFFERENTIABLE	203
C4M538	C4M538_ENTHI	Phenylalanyl-tRNA synthetase alpha subunit, putative	EHI_078230	8	0	0	11	0	0	DISCRETE	237
C4M553	C4M553_ENTHI	Leucine-rich repeat containing protein	EHI_177990	7	0	0	11	0	0	DISCRETE	255
C4LZW8	C4LZW8_ENTHI	26S protease regulatory subunit, putative	EHI_194570	7	1	0	11	1	0	DIFFERENTIABLE	382
C4M342	C4M342_ENTHI	Cysteine protease binding protein family 8	cpbf8	7	13	0	11	26	0	DISCRETE	661
C4M419	C4M419_ENTHI	T-complex protein 1 subunit delta	EHI_114120	7	2	0	11	3	0	DIFFERENTIABLE	230
C4LWN6	C4LWN6_ENTHI	HEAT repeat domain containing protein	EHI_069480	7	0	0	11	0	0	DISCRETE	192
C4M353	C4M353_ENTHI	Glycosyltransferase, putative	EHI_085980	6	0	0	11	0	0	DISCRETE	191
Q6AW60	Q6AW60_ENTHI	EhRab11A protein	EhRAB11A	6	5	1	11	6	1	DIFFERENTIABLE	299
C4LWX7	C4LWX7_ENTHI	Arginyl-tRNA synthetase	EHI_127020	5	0	0	11	0	0	DISCRETE	836
C4MB14	C4MB14_ENTHI	Serine/threonine-protein kinase 3, putative	EHI_156670	5	0	0	11	0	0	SUPERSET	490	S0AZB8
C4M746	C4M746_ENTHI	UDP-glucose 4-epimerase, putative	EHI_192050	5	0	0	11	0	0	EQUIVALENT	644	S0AYJ6
C4M3R0	C4M3R0_ENTHI	Rho family GTPase	EHI_146180	5	1	0	11	1	0	DISCRETE	109
C4M079	C4M079_ENTHI	Bacterial transferase hexapeptide family protein	EHI_004840	5	0	0	11	0	0	DISCRETE	589
C4LTL7	C4LTL7_ENTHI	Rho family GTPase	EHI_012240	5	1	0	11	1	0	SUPERSET	89
C4LX92	C4LX92_ENTHI	Rho family GTPase	EHI_013260	5	1	0	11	1	0	DIFFERENTIABLE	89
C4M0Y0	C4M0Y0_ENTHI	Rho family GTPase	EHI_015440	5	2	0	11	3	0	SUPERSET	860	C4M4W4, Q8I891, Q8I892, Q8I894, Q95TD4
C4M131	C4M131_ENTHI	Receptor mediated endocytosis protein, putative	EHI_105270	5	0	0	11	0	0	DIFFERENTIABLE	19
C4M096	C4M096_ENTHI	F-actin capping protein beta subunit, putative	EHI_005020	4	1	0	11	2	0	SUPERSET	270	S0AV06, S0AXS0
O96908	O96908_ENTHI	UMP-CMP kinase, putative	EHI_143580	4	0	0	11	0	0	DISCRETE	383
C4LWZ3	C4LWZ3_ENTHI	60S ribosomal protein L2/L8, putative	EHI_150470	4	2	0	11	5	0	SUPERSET	495
C4LTC5	C4LTC5_ENTHI	Cell division cycle protein 48, putative	EHI_045120	4	0	0	11	0	0	DIFFERENTIABLE	70
C4M660	C4M660_ENTHI	60S acidic riboomal protein P1, putative	EHI_042920	4	1	0	11	2	0	DISCRETE	635
B1N4F4	B1N4F4_ENTHI	Elongation factor 1 beta, putative	EHI_183460	4	1	0	11	1	0	DIFFERENTIABLE	729
C4M6A4	C4M6A4_ENTHI	Acetyl-coA carboxylase, putative	EHI_082530	8	0	1	10	0	1	DISCRETE	508
C4LW09	C4LW09_ENTHI	60S ribosomal protein L3, putative	EHI_055670	7	0	0	10	0	0	SUPERSET	416	S0AUR3, S0AYA3
C4LVW6	C4LVW6_ENTHI	Chaperonin-containing TCP-1, zeta subunit, putative	EHI_125800	7	0	0	10	0	0	SUPERSET	168	Q9GYV7
C4LY19	C4LY19_ENTHI	Isoleucyl-tRNA synthetase, putative	EHI_177660	6	0	0	10	0	0	DIFFERENTIABLE	35
C4LSZ7	C4LSZ7_ENTHI	GTP-binding protein, putative	EHI_148270	6	0	2	10	0	4	DISCRETE	585
C4LW75	C4LW75_ENTHI	T-complex protein 1 subunit alpha	EHI_155220	6	0	0	10	0	0	DISCRETE	317
C4M846	C4M846_ENTHI	26s protease regulatory subunit	EHI_052050	6	2	1	10	2	1	DIFFERENTIABLE	382
C4M013	C4M013_ENTHI	Acetyltransferase, putative	EHI_134640	5	0	0	10	0	0	DIFFERENTIABLE	583
B1N2W4	B1N2W4_ENTHI	Putative uncharacterized protein	EHI_098430	5	0	0	10	0	0	DIFFERENTIABLE	199
C4MAW3	C4MAW3_ENTHI	SnoRNA binding protein, putative	EHI_183900	5	0	0	10	0	0	DISCRETE	439
C4LXZ9	C4LXZ9_ENTHI	Galactose-inhibitable lectin 35 kDa subunit	EHI_035690	5	9	0	10	26	0	SUPERSET	283
C4LWA8	C4LWA8_ENTHI	Glutamyl-tRNA synthetase, putative	EHI_155570	4	0	0	10	0	0	DISCRETE	423
Q86D27	Q86D27_ENTHI	Methionine gamma-lyase	metg	4	7	0	10	14	0	DIFFERENTIABLE	436
C4LXC8	C4LXC8_ENTHI	60S ribosomal protein L18, putative	EHI_187740	4	0	0	10	0	0	DISCRETE	1055
C4M261	C4M261_ENTHI	Skp1 protein, putative	EHI_174130	4	3	0	10	8	0	DISCRETE	396
C4M5G9	C4M5G9_ENTHI	Galactose-inhibitable lectin, putative	EHI_058330	4	6	0	10	21	0	EQUIVALENT	283	S0B094
C4M023	C4M023_ENTHI	Iron-sulfur flavoprotein, putative	EHI_134740	3	0	0	10	0	0	DISCRETE	904
C4LT96	C4LT96_ENTHI	60S ribosomal protein L32, putative	EHI_044770	3	0	0	10	0	0	EQUIVALENT	1401	C4LV05, C4M2W1
C4M934	C4M934_ENTHI	Putative uncharacterized protein	EHI_097630	3	4	0	10	7	0	DISCRETE	155
C4M938	C4M938_ENTHI	60S ribosomal protein L7, putative	EHI_025830	6	1	0	9	2	0	DIFFERENTIABLE	342
C4LYV2	C4LYV2_ENTHI	60S ribosomal protein L7, putative	EHI_010650	6	1	1	9	2	1	SUPERSET	342	S0AYD9
B1N355	B1N355_ENTHI	AP-2 complex subunit mu, putative	EHI_124560	6	1	0	9	1	0	EQUIVALENT	571	Q1EQ16, S0AX88
C4LWS1	C4LWS1_ENTHI	Polyadenylate-binding protein, putative	EHI_198750	6	0	0	9	0	0	DISCRETE	514
C4LUR3	C4LUR3_ENTHI	Cysteine protease binding protein family 6	cpbf6	6	13	0	9	47	0	DISCRETE	249
C4LUW9	C4LUW9_ENTHI	Adenylyl-sulfate kinase	EHI_179080	6	0	0	9	0	0	DIFFERENTIABLE	385
C4MAJ4	C4MAJ4_ENTHI	Acetyltransferase, putative	EHI_143110	5	0	0	9	0	0	DIFFERENTIABLE	583
C4M5Y9	C4M5Y9_ENTHI	Copine, putative	EHI_137110	5	16	0	9	107	0	DISCRETE	896
C4M2J9	C4M2J9_ENTHI	Putative uncharacterized protein	EHI_054800	5	0	0	9	0	0	EQUIVALENT	121	S0AWH8, S0AXQ8
C4M4T9	C4M4T9_ENTHI	3'(2'),5'-bisphosphate nucleotidase, putative	EHI_193350	5	0	0	9	0	0	DIFFERENTIABLE	393
C4M3U5	C4M3U5_ENTHI	Proteasome subunit alpha type	EHI_163650	5	4	0	9	10	0	EQUIVALENT	604	C4MA29
C4M609	C4M609_ENTHI	40S ribosomal protein S3a	EHI_072040	5	0	0	9	0	0	SUPERSET	315
C4LWS5	C4LWS5_ENTHI	Alanyl-tRNA synthetase, putative	EHI_198790	5	0	0	9	0	0	DISCRETE	1494
C4LWS0	C4LWS0_ENTHI	40S ribosomal protein S19, putative	EHI_198740	5	0	0	9	0	0	SUPERSET	457	C4MA13
C4M658	C4M658_ENTHI	Thioredoxin, putative	EHI_042900	5	1	0	9	1	0	DISCRETE	934
B1N3T5	B1N3T5_ENTHI	Vacuolar protein sorting-associated protein 45, putative	EHI_154290	5	3	0	9	4	0	DIFFERENTIABLE	87
C4M525	C4M525_ENTHI	Peptidyl-prolyl cis-trans isomerase	EHI_128100	5	11	0	9	26	0	DISCRETE	259
C4M2J3	C4M2J3_ENTHI	60S ribosomal protein L17, putative	EHI_054740	4	1	0	9	4	0	DIFFERENTIABLE	337
C4LU92	C4LU92_ENTHI	Guanine nucleotide-binding protein subunit beta 2-like 1, putative	EHI_110400	4	2	0	9	3	0	DIFFERENTIABLE	1173
C4LUB9	C4LUB9_ENTHI	PCTP-like protein, putative	EHI_110720	4	1	0	9	4	0	EQUIVALENT	1015	C4M0E1
C4M3C4	C4M3C4_ENTHI	Protein kinase, putative	EHI_053060	4	0	0	9	0	0	DISCRETE	421
C4M561	C4M561_ENTHI	Uncharacterized protein	EHI_178080	4	0	0	9	0	0	DISCRETE	248
C4M2I4	C4M2I4_ENTHI	Serine carboxypeptidase (S28) family protein	EHI_054530	4	7	0	9	17	0	DISCRETE	141
C4LVS8	C4LVS8_ENTHI	Rho GTPase activating protein, putative	EHI_187110	6	0	0	8	0	0	DISCRETE	965
C4M3F3	C4M3F3_ENTHI	Ribosomal protein L13, putative	EHI_017700	5	0	0	8	0	0	DIFFERENTIABLE	122
C4M6P0	C4M6P0_ENTHI	Leucyl-tRNA synthetase, putative	EHI_161970	5	0	0	8	0	0	DISCRETE	611
C4M2E4	C4M2E4_ENTHI	T-complex protein 1 gamma subunit, putative	EHI_158250	5	1	0	8	1	0	DISCRETE	201
C4LTE3	C4LTE3_ENTHI	60S ribosomal protein L6, putative	EHI_140550	5	0	0	8	0	0	SUPERSET	309
B1N2H1	B1N2H1_ENTHI	T-complex protein 1 subunit eta, putative	EHI_044940	5	2	0	8	5	0	EQUIVALENT	12	C4M759
B1N424	B1N424_ENTHI	Adapter-related protein complex 3 (AP-3) subunit, putative	EHI_083430	5	0	0	8	0	0	DISCRETE	99
C4LWP4	C4LWP4_ENTHI	Uncharacterized protein	EHI_069560	5	3	0	8	5	0	DISCRETE	183
C4LYT1	C4LYT1_ENTHI	Putative uncharacterized protein	EHI_010340	5	3	0	8	7	0	SUPERSET	132	S0AZK4
B1N2L3	B1N2L3_ENTHI	Galactose-specific adhesin light subunit, putative	EHI_049690	5	9	0	8	27	0	SUPERSET	283	Q24846
C4M7C8	C4M7C8_ENTHI	Beta-hexosaminidase	EHI_007330	5	12	0	8	33	0	EQUIVALENT	186	Q86M34
C4LUS2	C4LUS2_ENTHI	Putative uncharacterized protein	EHI_178560	4	0	0	8	0	0	DISCRETE	487
C4LY50	C4LY50_ENTHI	40S ribosomal protein S25, putative	EHI_177470	4	0	0	8	0	0	EQUIVALENT	389	C4M9F4
Q1EQ03	Q1EQ03_ENTHI	EhSyntaxin B	EHI_021410	4	7	0	8	18	0	DIFFERENTIABLE	348
C4LSX5	C4LSX5_ENTHI	Putative uncharacterized protein	EHI_148050	4	1	0	8	2	0	DISCRETE	93
C4LWE7	C4LWE7_ENTHI	Uncharacterized protein	EHI_096340	4	0	0	8	0	0	EQUIVALENT	983	S0AVB8, S0AZQ2
C4MAK2	C4MAK2_ENTHI	Uncharacterized protein	EHI_017000	4	2	0	8	3	0	DIFFERENTIABLE	430
O15602	ACTO_ENTHI	Actobindin homolog		4	0	0	8	0	0	DIFFERENTIABLE	163
C4M7M4	C4M7M4_ENTHI	Cell surface protease gp63, putative	EHI_200230	4	3	0	8	4	0	DISCRETE	998
C4LZS8	C4LZS8_ENTHI	Actin, putative	EHI_039070	3	0	0	8	0	0	DISCRETE	1257
C4M574	C4M574_ENTHI	40S ribosomal protein S12	EHI_111760	3	0	0	8	0	0	DIFFERENTIABLE	462
C4LSZ3	C4LSZ3_ENTHI	60S ribosomal protein L37a, putative	EHI_148230	3	1	0	8	3	0	DIFFERENTIABLE	883
C4M944	C4M944_ENTHI	Uncharacterized protein	EHI_083600	3	0	0	8	0	0	DISCRETE	905
C4LXI9	C4LXI9_ENTHI	Actin, putative	EHI_131230	3	0	0	8	0	0	DIFFERENTIABLE	947
Q1EPY8	Q1EPY8_ENTHI	V-SNARE protein VampD3	EHI_081370	3	0	0	8	0	0	DISCRETE	169
C4M036	C4M036_ENTHI	UDP-N-acetylglucosamine pyrophosphorylase, putative	EHI_021200	5	0	0	7	0	0	EQUIVALENT	990	C4MA87
C4MAK5	C4MAK5_ENTHI	Eukaryotic translation initiation factor 3 subunit G	EHI_017030	5	0	1	7	0	1	DISCRETE	1115
C4M9X3	C4M9X3_ENTHI	Protein phosphatase family protein	EHI_179330	5	0	0	7	0	0	DIFFERENTIABLE	479
C4M2Q1	C4M2Q1_ENTHI	Eukaryotic translation initiation factor 6, putative	EHI_006170	5	0	0	7	0	0	DISCRETE	360
Q769I7	Q769I7_ENTHI	NifS/IscS-related protein	EhnifS	4	0	0	7	0	0	EQUIVALENT	813	S0AVH9
C4LWQ4	C4LWQ4_ENTHI	Putative uncharacterized protein	EHI_198580	4	2	0	7	3	0	DISCRETE	353
C4M2W9	C4M2W9_ENTHI	Putative uncharacterized protein	EHI_048560	4	1	0	7	2	0	DIFFERENTIABLE	23
C4LTQ5	C4LTQ5_ENTHI	40S ribosomal protein S3a	EHI_050280	4	0	0	7	0	0	SUPERSET	315	S0AZ77, S0B1H3
C4M8D7	C4M8D7_ENTHI	26S protease regulatory subunit, putative	EHI_185410	4	1	0	7	1	0	SUPERSET	382
C4M3C0	C4M3C0_ENTHI	26S protease regulatory subunit, putative	EHI_053020	4	2	0	7	2	0	DIFFERENTIABLE	382
Q1EQ27	Q1EQ27_ENTHI	Beta subunit isoform a	EHI_023600	4	1	0	7	1	0	DISCRETE	497
B1N354	B1N354_ENTHI	Ras-1, putative	EHI_124520	4	1	0	7	2	0	DISCRETE	760
C4M472	C4M472_ENTHI	Deoxycytidine triphosphate deaminase, putative	EHI_140240	4	2	0	7	3	0	DISCRETE	776
C4LZJ6	C4LZJ6_ENTHI	Putative uncharacterized protein	EHI_124620	4	0	0	7	0	0	DISCRETE	704
C4M4I3	C4M4I3_ENTHI	60S acidic ribosomal protein P2, putative	EHI_138770	4	0	0	7	0	0	DIFFERENTIABLE	975
B1N3X3	B1N3X3_ENTHI	Putative uncharacterized protein	EHI_117690	4	4	0	7	13	0	DISCRETE	784
C4LSV2	C4LSV2_ENTHI	EH-domain containing protein, putative	EHI_152680	4	0	1	7	0	1	DIFFERENTIABLE	19
C4LYM0	C4LYM0_ENTHI	WD domain containing protein	EHI_118720	4	0	0	7	0	0	DISCRETE	970
C4LSR0	C4LSR0_ENTHI	Putative uncharacterized protein	EHI_152220	4	2	0	7	2	0	DIFFERENTIABLE	942
Q24806	Q24806_ENTHI	Ras homologue 1	Ehras1	4	2	0	7	2	0	DIFFERENTIABLE	388
C4LZJ5	C4LZJ5_ENTHI	Ras family GTPase	EHI_124610	4	2	0	7	2	0	EQUIVALENT	388	Q24807
C4M8S6	C4M8S6_ENTHI	Acid phosphatase, putative	EHI_146950	4	5	0	7	13	0	DISCRETE	747
Q5FZP2	Q5FZP2_ENTHI	p21-activated kinase	EHI_148280	3	1	0	7	1	0	DIFFERENTIABLE	464
C4LUB6	C4LUB6_ENTHI	Uncharacterized protein	EHI_110690	3	0	0	7	0	0	DISCRETE	1305
C4LXT6	C4LXT6_ENTHI	Phosphoribulokinase /uridine kinase family protein	EHI_087540	3	1	0	7	1	0	DISCRETE	512
C4M569	C4M569_ENTHI	60S ribosomal protein L26, putative	EHI_111570	3	1	0	7	1	0	DIFFERENTIABLE	969
C4LX05	C4LX05_ENTHI	60S ribosomal protein L17, putative	EHI_127330	3	1	0	7	4	0	EQUIVALENT	337	C4M0M6
C4LXG1	C4LXG1_ENTHI	Purine nucleoside phosphorylase, putative	EHI_130930	3	1	1	7	2	1	EQUIVALENT	572	S0AZI4
C4LUX3	C4LUX3_ENTHI	Putative uncharacterized protein	EHI_092080	3	0	0	7	0	0	DISCRETE	625
C4LVB0	C4LVB0_ENTHI	60S ribosomal protein L23, putative	EHI_196920	3	0	0	7	0	0	DISCRETE	84
C4M399	C4M399_ENTHI	Vacuolar ATP synthase subunit d, putative	EHI_106350	3	1	0	7	1	0	DISCRETE	496
C4M363	C4M363_ENTHI	Proteasome alpha subunit, putative	EHI_086080	3	3	0	7	6	0	DISCRETE	549
B1N302	B1N302_ENTHI	70 kDa peptidyl-prolyl isomerase, putative	EHI_051870	3	0	0	7	0	0	EQUIVALENT	720	C4LUU9
C4LV64	C4LV64_ENTHI	Ribosomal protein L23A, putative	EHI_182850	2	2	0	7	2	0	EQUIVALENT	379	Q9XYW0
C4M4A8	C4M4A8_ENTHI	Protein transport protein SEC61 gamma subunit, putative	EHI_048170	2	1	0	7	5	0	DISCRETE	481
B1N4V3	B1N4V3_ENTHI	60S ribosomal protein L35a, putative	EHI_025590	5	0	0	6	0	0	DISCRETE	593
C4M2M6	C4M2M6_ENTHI	Rho guanine nucleotide exchange factor, putative	EHI_005910	5	0	0	6	0	0	DISCRETE	707
C4LWW8	C4LWW8_ENTHI	Asparaginyl-tRNA synthetase, putative	EHI_126920	4	0	0	6	0	0	DISCRETE	98
C4M2G9	C4M2G9_ENTHI	Prolyl-tRNA synthetase, putative	EHI_040400	4	0	0	6	0	0	DISCRETE	234
C4LVM3	C4LVM3_ENTHI	Protein kinase, putative	EHI_103810	4	0	0	6	0	0	DIFFERENTIABLE	63
C4M7T9	C4M7T9_ENTHI	Ubiquitin-activating enzyme, putative	EHI_020270	4	2	1	6	4	3	DIFFERENTIABLE	627
C4LY23	C4LY23_ENTHI	Putative uncharacterized protein	EHI_176980	4	0	1	6	0	1	DIFFERENTIABLE	246
C4LYI2	HIT_ENTHI	Histidine triad nucleotide-binding protein	EHI_093910	4	0	0	6	0	0	DISCRETE	492
C4M2N2	C4M2N2_ENTHI	Putative uncharacterized protein	EHI_005970	4	0	0	6	0	0	DISCRETE	708
C4M3Z2	C4M3Z2_ENTHI	Long-chain-fatty-acid--CoA ligase, putative	EHI_185240	4	0	0	6	0	0	DISCRETE	1180
C4LT93	C4LT93_ENTHI	UMP-CMP kinase, putative	EHI_044740	4	0	0	6	0	0	DISCRETE	821
C4LV36	C4LV36_ENTHI	Vacuolar ATP synthase subunit E, putative	EHI_182550	4	5	0	6	16	0	DISCRETE	443
C4LY32	C4LY32_ENTHI	Putative uncharacterized protein	EHI_177180	4	5	0	6	10	0	DISCRETE	545
S0AV91	S0AV91_ENTHI	Cysteine proteinase 1, putative		4	10	0	6	25	0	DIFFERENTIABLE	195
C4LU94	C4LU94_ENTHI	Tryptophanyl-tRNA synthetase, putative	EHI_110420	3	0	0	6	0	0	EQUIVALENT	144	C4M7U9
C4LSU3	C4LSU3_ENTHI	60S ribosomal protein L26, putative	EHI_152570	3	0	0	6	0	0	DIFFERENTIABLE	969
C4LVP9	C4LVP9_ENTHI	Protein kinase domain containing protein	EHI_186820	3	0	0	6	0	0	DIFFERENTIABLE	621
C4LWT3	C4LWT3_ENTHI	Transcription factor BTF3, putative	EHI_198870	3	1	0	6	2	0	DIFFERENTIABLE	23
C4LW10	C4LW10_ENTHI	Ribosomal protein S29, putative	EHI_030070	3	0	0	6	0	0	EQUIVALENT	530	O15619
Q1EQ50	Q1EQ50_ENTHI	EhSec23A	EHI_008730	3	0	0	6	0	0	DISCRETE	419
C4M8V1	C4M8V1_ENTHI	Cysteinyl-tRNA synthetase, putative	EHI_169700	3	0	1	6	0	2	DISCRETE	826
C4M451	C4M451_ENTHI	Proteasome regulatory subunit, putative	EHI_030170	3	1	0	6	4	0	DISCRETE	412
C4MB90	C4MB90_ENTHI	Helix-turn-helix protein, putative	EHI_093330	3	0	0	6	0	0	DISCRETE	1480
C4LY36	C4LY36_ENTHI	26s proteasome subunit P45 family protein, putative	EHI_177320	3	0	0	6	0	0	DISCRETE	829
C4M0C6	C4M0C6_ENTHI	40S ribosomal protein S15, putative	EHI_064570	3	0	0	6	0	0	EQUIVALENT	902	C4M7H3
C4LSI0	C4LSI0_ENTHI	Uncharacterized protein	EHI_151380	3	0	0	6	0	0	DISCRETE	946
C4M2S1	C4M2S1_ENTHI	Putative uncharacterized protein	EHI_161040	3	6	0	6	19	0	DISCRETE	243
C4M758	C4M758_ENTHI	Alpha-NAC protein, putative	EHI_083250	3	2	0	6	5	0	EQUIVALENT	76	S0AX48
C4LZY7	C4LZY7_ENTHI	Putative uncharacterized protein	EHI_065710	3	1	0	6	1	0	DISCRETE	29
S0AXJ4	S0AXJ4_ENTHI	Uncharacterized protein		3	4	0	6	10	0	DIFFERENTIABLE	1190
Q6Y0Y5	Q6Y0Y5_ENTHI	Vacuolar protein sorting 35	Vps35-1	2	1	0	6	1	0	DISCRETE	165
C4LVN9	C4LVN9_ENTHI	40S ribosomal protein S12	EHI_186720	2	0	0	6	0	0	DIFFERENTIABLE	462
C4M854	C4M854_ENTHI	Proteasome subunit alpha type	EHI_052140	2	0	0	6	0	0	DISCRETE	44
C4M051	C4M051_ENTHI	Putative uncharacterized protein	EHI_021360	2	0	0	6	0	0	DISCRETE	15
C4M859	C4M859_ENTHI	Putative uncharacterized protein	EHI_052040	2	0	0	6	0	0	EQUIVALENT	1222	C4MAD5
C4M015	C4M015_ENTHI	Putative uncharacterized protein	EHI_134660	2	0	0	6	0	0	EQUIVALENT	691	S0AVE6
C4M417	C4M417_ENTHI	Putative uncharacterized protein	EHI_195140	2	0	0	6	0	0	DISCRETE	148
C4LU03	C4LU03_ENTHI	Serine carboxypeptidase (S28) family protein	EHI_068090	2	2	0	6	6	0	DISCRETE	949
C4M648	C4M648_ENTHI	Proteasome regulatory subunit, putative	EHI_179970	1	0	0	6	0	0	DISCRETE	941
Q24809	Q24809_ENTHI	P-glycoprotein 6	EhPGP6	5	8	0	5	16	0	DIFFERENTIABLE	429
C4M4W9	C4M4W9_ENTHI	Long-chain-fatty-acid--CoA ligase, putative	EHI_029050	4	0	0	5	0	0	DISCRETE	592
C4LVS1	C4LVS1_ENTHI	Phosphofructokinase, putative	EHI_187040	4	0	0	5	0	0	DIFFERENTIABLE	778
C4LX06	C4LX06_ENTHI	Translation initiation factor IF-2, putative	EHI_127340	4	0	0	5	0	0	DISCRETE	588
C4M8C7	C4M8C7_ENTHI	S phingosine-1-phosphate lyase 1, putative	EHI_039350	4	0	0	5	0	0	DISCRETE	214
C4M059	C4M059_ENTHI	40S ribosomal protein S28, putative	EHI_021450	3	1	0	5	4	0	DIFFERENTIABLE	227
Q8WR14	Q8WR14_ENTHI	Hydroxylamine reductase, putative	HCP	3	1	0	5	1	0	DISCRETE	599
C4LXE4	C4LXE4_ENTHI	Autophagy-related protein	EHI_130660	3	0	0	5	0	0	DIFFERENTIABLE	586
C4LVL5	C4LVL5_ENTHI	Threonyl-tRNA synthetase, putative	EHI_103730	3	1	0	5	1	0	DISCRETE	386
S0AW96	S0AW96_ENTHI	Uncharacterized protein		3	0	0	5	0	0	DIFFERENTIABLE	187
C4LY22	C4LY22_ENTHI	Cdc48-like protein, putative	EHI_176970	3	1	0	5	2	0	DIFFERENTIABLE	368
Q1EQ15	Q1EQ15_ENTHI	Mu subunit isoform a	EHI_099240	3	0	0	5	0	0	EQUIVALENT	791	S0AW98
C4M5B7	C4M5B7_ENTHI	40S ribosomal protein S23, putative	EHI_020310	3	0	0	5	0	0	DISCRETE	1215
C4M3J8	C4M3J8_ENTHI	START domain containing protein	EHI_109680	3	0	1	5	0	1	DIFFERENTIABLE	605
C4LYX6	C4LYX6_ENTHI	Pleckstrin homology (PH) domain containing protein	EHI_117920	3	0	0	5	0	0	SUPERSET	999	S0AXI1
C4M1U7	C4M1U7_ENTHI	Putative uncharacterized protein	EHI_027610	3	0	0	5	0	0	DISCRETE	276
C4M3D4	C4M3D4_ENTHI	RNA-binding protein, putative	EHI_053170	3	1	0	5	2	0	EQUIVALENT	1108	S0AWK1
C4MBI6	C4MBI6_ENTHI	Calcineurin B subunit, putative	EHI_106670	3	1	0	5	2	0	DISCRETE	1473
C4LY34	C4LY34_ENTHI	Putative uncharacterized protein	EHI_177300	3	0	0	5	0	0	DISCRETE	162
C4M6N7	C4M6N7_ENTHI	LIM zinc finger domain containing protein	EHI_161940	3	0	0	5	0	0	DISCRETE	344
C4M1W8	C4M1W8_ENTHI	26S proteasome non-ATPase regulatory subunit 14, putative	EHI_164750	3	0	0	5	0	0	DISCRETE	1265
C4LZR0	C4LZR0_ENTHI	WD repeat protein	EHI_038880	3	1	0	5	4	0	DIFFERENTIABLE	181
C4M4F3	C4M4F3_ENTHI	Proteasome beta subunit, putative	EHI_078710	3	1	0	5	1	0	DISCRETE	1295
C4M3X0	C4M3X0_ENTHI	Plasma membrane calcium-transporting ATPase, putative	EHI_016480	3	2	2	5	3	3	DIFFERENTIABLE	547
C4M3F2	C4M3F2_ENTHI	Uncharacterized protein	EHI_017690	3	0	0	5	0	0	DISCRETE	915
C4M8G6	C4M8G6_ENTHI	Replication factor A protein 1, putative	EHI_062980	3	0	0	5	0	0	DISCRETE	1211
C4M0K6	C4M0K6_ENTHI	Leucine-rich repeat containing protein	EHI_024640	3	0	0	5	0	0	DISCRETE	450
C4M4L8	C4M4L8_ENTHI	Small GTPase Sar1	EHI_031410	3	1	0	5	2	0	DIFFERENTIABLE	190
C4M307	C4M307_ENTHI	Cysteine proteinase 1, putative	EHI_074180	3	10	0	5	28	0	SUPERSET	195	Q01957, S0AV81, S0AV92, S0AW39, S0AW79, S0AW85, S0AWI9, S0AWZ7, S0AXQ6, S0AYY3, S0AZB3, S0AZR5
C4LVF0	C4LVF0_ENTHI	Sulfotransferase, putative	EHI_197340	3	0	0	5	0	0	DISCRETE	929
C4M7U5	C4M7U5_ENTHI	Putative uncharacterized protein	EHI_020330	3	1	0	5	1	0	DISCRETE	1128
C4M2S8	C4M2S8_ENTHI	Steroid 5-alpha reductase, putative	EHI_076870	3	3	0	5	7	0	DISCRETE	274
C4M982	C4M982_ENTHI	Inorganic pyrophosphatase, putative	EHI_124880	3	1	0	5	2	0	DISCRETE	669
C4M1F1	C4M1F1_ENTHI	Plasma membrane calcium-transporting ATPase, putative	EHI_030830	3	0	0	5	0	0	DISCRETE	1343
C4M8M7	C4M8M7_ENTHI	Putative uncharacterized protein	EHI_114320	3	9	0	5	28	0	DISCRETE	113
S0AY83	S0AY83_ENTHI	60S ribosomal protein L4, putative		2	1	0	5	2	0	DIFFERENTIABLE	68
C4LZA2	C4LZA2_ENTHI	60S ribosomal protein L4, putative	EHI_000510	2	1	0	5	2	0	DIFFERENTIABLE	68
B1N384	B1N384_ENTHI	60S ribosomal protein L4, putative	EHI_064710	2	1	1	5	2	1	SUPERSET	68	S0AYF5, S0B2U7
S0AWM8	S0AWM8_ENTHI	60S ribosomal protein L4, putative		2	1	0	5	2	0	SUPERSET	68
C4M8F6	C4M8F6_ENTHI	40S ribosomal protein S27a, putative	EHI_036530	2	0	0	5	0	0	DISCRETE	178
C4M0M9	C4M0M9_ENTHI	60S ribosomal protein L37a, putative	EHI_008650	2	1	0	5	3	0	DIFFERENTIABLE	883
Q95030	Q95030_ENTHI	Cysteine proteinase, putative	CP5	2	7	0	5	14	0	SUPERSET	431	S0AUZ5, S0AW83, S0AXA6, S0AXD8, S0AXX8, S0AZ47, S0B0T6
C4M162	C4M162_ENTHI	NADP-dependent alcohol dehydrogenase, putative	EHI_107210	2	0	0	5	0	0	EQUIVALENT	1122	S0AWL2
Q8MZU6	Q8MZU6_ENTHI	Small heat shock protein	HSP16	2	0	0	5	0	0	DISCRETE	1436
C4MAS9	C4MAS9_ENTHI	Methionine gamma-lyase	EHI_144610	2	1	0	5	5	0	SUPERSET	436	S0AW11
Q6AW64	Q6AW64_ENTHI	EhRab7E protein	EhRAB7E	2	0	1	5	0	1	DIFFERENTIABLE	188
B1N5W3	B1N5W3_ENTHI	Glycogenphosphorylase, putative	EHI_129000	2	0	0	5	0	0	DIFFERENTIABLE	216
C4M2R9	C4M2R9_ENTHI	Putative uncharacterized protein	EHI_161020	2	0	0	5	0	0	DISCRETE	595
C4LXA4	C4LXA4_ENTHI	Lysine and glutamic acid-rich protein 1 (KERP1)	EHI_098210	2	0	0	5	0	0	DISCRETE	453
C4LUA1	C4LUA1_ENTHI	NADPH-dependent oxidoreductase	EhNO1	4	0	0	4	0	0	DIFFERENTIABLE	135
C4LY16	C4LY16_ENTHI	Calcium binding family protein	EHI_177620	3	3	0	4	4	0	DIFFERENTIABLE	273
B1N444	B1N444_ENTHI	Ribosomal protein L13A, putative	EHI_200090	3	0	0	4	0	0	EQUIVALENT	122	C4M8M3
C4M6M6	C4M6M6_ENTHI	Serine/threonine-protein phosphatase	EHI_147500	3	0	0	4	0	0	DISCRETE	376
B1N5B7	B1N5B7_ENTHI	Acetyltransferase, putative	EHI_122100	3	0	0	4	0	0	SUPERSET	680
B1N3H6	B1N3H6_ENTHI	3-phosphoinositide-dependent protein kinase 1, putative	EHI_006200	3	0	0	4	0	0	EQUIVALENT	1018	C4M3E9
C4M6I7	C4M6I7_ENTHI	Uncharacterized protein	EHI_173480	3	0	0	4	0	0	DISCRETE	541
C4M6P6	C4M6P6_ENTHI	Guanine nucleotide-binding protein subunit beta 2-like 1, putative	EHI_171280	3	0	0	4	0	0	DIFFERENTIABLE	1326
Q5MAR2	Q5MAR2_ENTHI	Aldose 1-epimerase	EHI_094090	3	0	0	4	0	0	EQUIVALENT	1016	S0AXS2, S0AZZ4
C4LX00	C4LX00_ENTHI	Aminoacyl-histidine dipeptidase, putative	EHI_127280	3	0	0	4	0	0	DISCRETE	1430
Q53UB0	Q53UB0_ENTHI	Vacuolar sorting protein 26, putative	EhVPS26	3	0	0	4	0	0	DIFFERENTIABLE	1027
B1N459	B1N459_ENTHI	ATP-binding cassette protein, putative	EHI_047760	3	0	0	4	0	0	DISCRETE	847
C4M571	C4M571_ENTHI	Tryptophanase, putative	EHI_111610	3	0	0	4	0	0	DISCRETE	364
C4LVQ0	C4LVQ0_ENTHI	60S acidic ribosomal protein P2, putative	EHI_186830	3	0	0	4	0	0	DIFFERENTIABLE	975
B1N4G2	B1N4G2_ENTHI	Putative uncharacterized protein	EHI_187800	3	0	0	4	0	0	DIFFERENTIABLE	199
C4M2E1	C4M2E1_ENTHI	Putative uncharacterized protein	EHI_158220	3	0	0	4	0	0	DISCRETE	217
C4M5T0	C4M5T0_ENTHI	Rho family GTPase	EHI_070730	3	0	0	4	0	0	EQUIVALENT	89	Q24816
C4MAF8	C4MAF8_ENTHI	Leucine rich repeat / protein phosphatase 2C domain containing protein	EHI_167290	3	0	0	4	0	0	DISCRETE	470
Q5NT17	Q5NT17_ENTHI	Small GTPase EhRabM1	EhRabM1	3	0	0	4	0	0	DISCRETE	131
C4LVL3	C4LVL3_ENTHI	Soluble calcium-activated nucleotidase 1, putative	EHI_103690	3	2	0	4	4	0	EQUIVALENT	395	S0AZ15
B1N2Z1	B1N2Z1_ENTHI	Putative uncharacterized protein	EHI_035730	3	0	0	4	0	0	DISCRETE	676
C4M6U0	C4M6U0_ENTHI	Dolichol monophosphate mannose synthase, putative	EHI_054260	3	1	0	4	1	0	EQUIVALENT	1264	S0B0U1
C4M5K9	C4M5K9_ENTHI	Heat shock protein 70 family	EHI_001950	3	3	0	4	5	0	DISCRETE	160
C4LVM8	C4LVM8_ENTHI	Putative uncharacterized protein	EHI_103860	2	0	0	4	0	0	DISCRETE	425
C4M1L5	C4M1L5_ENTHI	Putative uncharacterized protein	EHI_085050	2	0	0	4	0	0	DISCRETE	361
C4LZQ8	C4LZQ8_ENTHI	40S ribosomal protein S28, putative	EHI_038860	2	0	0	4	0	0	DIFFERENTIABLE	227
C4LVC0	C4LVC0_ENTHI	40S ribosomal protein S10, putative	EHI_197030	2	0	0	4	0	0	DISCRETE	460
C4LWV7	C4LWV7_ENTHI	Serine/threonine-protein phosphatase	EHI_199120	2	0	0	4	0	0	DISCRETE	664
C4LXC0	C4LXC0_ENTHI	Orn/Arg/Lys decarboxylase, putative	EHI_098380	2	0	0	4	0	0	DISCRETE	1268
C4M431	C4M431_ENTHI	Valyl-tRNA synthetase, putative	EHI_033680	2	0	0	4	0	0	SUPERSET	167
C4M3V7	C4M3V7_ENTHI	Putative uncharacterized protein	EHI_016350	2	0	1	4	0	1	DISCRETE	795
C4M828	C4M828_ENTHI	Phenylalanyl-tRNA synthetase beta subunit, putative	EHI_002130	2	0	0	4	0	0	DISCRETE	207
C4M8N0	C4M8N0_ENTHI	Putative uncharacterized protein	EHI_114350	2	0	0	4	0	0	DISCRETE	506
C4M855	C4M855_ENTHI	Rho family GTPase	EHI_052150	2	1	0	4	1	0	DIFFERENTIABLE	5
Q27642	Q27642_ENTHI	Putative plasma membrane calcium ion-transporting ATPase		2	2	1	4	3	1	DIFFERENTIABLE	547
C4LY53	C4LY53_ENTHI	Putative uncharacterized protein	EHI_177500	2	0	0	4	0	0	DISCRETE	1094
C4LZG8	C4LZG8_ENTHI	Putative uncharacterized protein	EHI_138080	2	0	0	4	0	0	DISCRETE	973
C4M2S0	C4M2S0_ENTHI	Rab family GTPase	EHI_161030	2	1	0	4	1	0	EQUIVALENT	526	Q9BLE3
C4M878	C4M878_ENTHI	Protein phosphatase regulatory subunit, putative	EHI_098850	2	0	0	4	0	0	EQUIVALENT	761	S0B2C2
B1N378	B1N378_ENTHI	S-adenosylmethionine synthase	EHI_004920	2	0	0	4	0	0	EQUIVALENT	1583	B1N3M4, C4M272
C4LTF9	C4LTF9_ENTHI	High mobility group (HMG) box domain containing protein	EHI_045480	2	0	0	4	0	0	DISCRETE	1471
C4MA08	C4MA08_ENTHI	HEAT repeat domain containing protein	EHI_146520	2	0	0	4	0	0	DISCRETE	138
C4M8C0	C4M8C0_ENTHI	Long-chain-fatty-acid--CoA ligase, putative	EHI_188590	2	1	0	4	1	0	DISCRETE	1075
C4M0A4	C4M0A4_ENTHI	Eukaryotic translation initiation factor 2 alpha subunit, putative	EHI_005100	2	0	0	4	0	0	DISCRETE	375
C4M3E2	C4M3E2_ENTHI	Putative uncharacterized protein	EHI_095850	2	1	0	4	2	0	DIFFERENTIABLE	800
C4M717	C4M717_ENTHI	Rab family GTPase	EHI_189990	2	0	1	4	0	1	EQUIVALENT	188	Q6AW66
C4M1J9	C4M1J9_ENTHI	4-alpha-glucanotransferase, putative	EHI_084680	2	5	0	4	9	0	DISCRETE	328
C4M081	C4M081_ENTHI	Ras family GTPase	EHI_004860	2	0	0	4	0	0	DISCRETE	239
C4M5S0	C4M5S0_ENTHI	Putative uncharacterized protein	EHI_070680	2	0	0	4	0	0	EQUIVALENT	816	S0AWF6, S0AYV5
C4LU87	C4LU87_ENTHI	Thioredoxin, putative	EHI_110350	2	10	0	4	21	0	DISCRETE	736
Q1EPY9	Q1EPY9_ENTHI	Vesicle-associated membrane protein, putative	EHI_170630	2	0	0	4	0	0	DISCRETE	1111
O15782	O15782_ENTHI	Chaperonin 60	cpn60	2	0	0	4	0	0	DIFFERENTIABLE	579
S0AWL1	S0AWL1_ENTHI	40S ribosomal protein S12		1	0	0	4	0	0	DIFFERENTIABLE	462
C4M533	C4M533_ENTHI	Putative uncharacterized protein	EHI_128150	1	0	0	4	0	0	DISCRETE	587
Q7Z0T4	Q7Z0T4_ENTHI	Longin-type vesicle-associated membrane protein, putative	SYBL2	1	0	0	4	0	0	DISCRETE	392
C4LTA0	C4LTA0_ENTHI	Ribosomal protein L10, putative	EHI_044810	3	0	0	3	0	0	SUPERSET	738	Q8MTT4, S0AW47
C4MBQ9	C4MBQ9_ENTHI	Leucine rich repeat protein, BspA family	EHI_015120	3	1	0	3	1	0	SUPERSET	59	S0AX85, S0B2D4
C4M0Y3	C4M0Y3_ENTHI	S-phase kinase-associated protein 1A, putative	EHI_134960	3	1	0	3	1	0	DISCRETE	844
B1N2V8	B1N2V8_ENTHI	Adaptor protein (AP) family protein	EHI_013040	3	0	0	3	0	0	DISCRETE	520
C4LVH2	C4LVH2_ENTHI	T-complex protein 1 beta subunit, putative	EHI_103270	3	0	0	3	0	0	DISCRETE	525
C4LW96	C4LW96_ENTHI	Chaperonin containing TCP-1 epsilon subunit, putative	EHI_155450	3	0	0	3	0	0	DISCRETE	824
C4M8L9	C4M8L9_ENTHI	Putative uncharacterized protein	EHI_090430	3	0	0	3	0	0	DISCRETE	307
B1N3U1	B1N3U1_ENTHI	P-glycoprotein 6, putative	EHI_081130	3	2	0	3	4	0	DIFFERENTIABLE	429
C4M989	C4M989_ENTHI	Leucine-rich repeat containing protein	EHI_119950	3	0	0	3	0	0	DISCRETE	665
C4M474	C4M474_ENTHI	Copine, putative	EHI_140260	3	4	0	3	8	0	DISCRETE	11
C4M8R8	C4M8R8_ENTHI	60S ribosomal protein L13, putative	EHI_181560	2	1	0	3	1	0	SUPERSET	403
C4M0E0	C4M0E0_ENTHI	Putative uncharacterized protein	EHI_006550	2	0	0	3	0	0	DISCRETE	1158
Q8WQH7	Q8WQH7_ENTHI	Serine-threonine protein kinase PK2	EHI_004790	2	0	0	3	0	0	SUPERSET	833	S0AWP0
C4MAV9	C4MAV9_ENTHI	Purine nucleoside phosphorylase, putative	EHI_012720	2	0	0	3	0	0	DISCRETE	958
C4LU84	C4LU84_ENTHI	Protein phosphatase, putative	EHI_110320	2	0	0	3	0	0	DISCRETE	1000
C4LYA4	C4LYA4_ENTHI	Putative uncharacterized protein	EHI_167020	2	0	0	3	0	0	DISCRETE	590
B1N569	B1N569_ENTHI	Predicted protein	EHI_201420	2	0	0	3	0	0	DIFFERENTIABLE	187
C4LWW3	C4LWW3_ENTHI	40S ribosomal protein S21	EHI_126870	2	0	0	3	0	0	DISCRETE	663
C4LY33	C4LY33_ENTHI	Putative uncharacterized protein	EHI_177190	2	0	0	3	0	0	DISCRETE	339
C4M1C8	C4M1C8_ENTHI	Ubiquitin-like protein	EHI_170060	2	0	0	3	0	0	DISCRETE	1444
C4M0I4	C4M0I4_ENTHI	D-hydantoinase, putative	EHI_024420	2	0	0	3	0	0	DISCRETE	645
C4M186	C4M186_ENTHI	Putative uncharacterized protein	EHI_188120	2	0	0	3	0	0	DISCRETE	288
C4M285	C4M285_ENTHI	26S protease regulatory subunit, putative	EHI_180350	2	1	0	3	1	0	DISCRETE	275
C4M7A5	C4M7A5_ENTHI	40S ribosomal protein S15, putative	EHI_046690	2	0	0	3	0	0	DIFFERENTIABLE	902
C4MAN6	C4MAN6_ENTHI	Putative uncharacterized protein	EHI_016130	2	0	0	3	0	0	DISCRETE	319
C4LWU1	C4LWU1_ENTHI	WD-repeat protein	EHI_198950	2	1	0	3	4	0	DIFFERENTIABLE	181
C4LXC1	C4LXC1_ENTHI	Putative uncharacterized protein	EHI_098390	2	0	0	3	0	0	DISCRETE	786
C4M9B6	C4M9B6_ENTHI	I/LWEQ domain protein	EHI_003930	2	0	0	3	0	0	DISCRETE	1149
C4LSM1	C4LSM1_ENTHI	Ganglioside gm2 activator protein, putative	EHI_151800	2	5	0	3	21	0	DISCRETE	690
C4MAB3	C4MAB3_ENTHI	DNA-directed RNA polymerase	EHI_186020	2	0	0	3	0	0	DISCRETE	898
C4LU38	C4LU38_ENTHI	COP9 signalosome subunit, putative	EHI_068470	2	0	0	3	0	0	DISCRETE	804
C4M042	C4M042_ENTHI	Villidin, putative	EHI_021270	2	0	0	3	0	0	DISCRETE	852
C4LSD9	C4LSD9_ENTHI	Translation initiation factor 2 beta subunit, putative	EHI_153480	2	0	0	3	0	0	DISCRETE	1423
C4M3J0	C4M3J0_ENTHI	Iron-sulfur flavoprotein, putative	EHI_138480	2	0	0	3	0	0	DIFFERENTIABLE	616
Q963D1	Q963D1_ENTHI	Small GTP-binding protein Rab8	rab8	2	1	0	3	2	0	DIFFERENTIABLE	277
C4MA90	C4MA90_ENTHI	Putative uncharacterized protein	EHI_039860	2	12	0	3	30	0	DISCRETE	4
C4M041	C4M041_ENTHI	Villidin, putative	EHI_021260	2	1	0	3	1	0	DISCRETE	1234
C4LV53	C4LV53_ENTHI	Dipeptidyl-peptidase, putative	EHI_182720	2	4	0	3	8	0	DISCRETE	391
C4MAY3	C4MAY3_ENTHI	Putative uncharacterized protein	EHI_167480	2	0	0	3	0	0	DISCRETE	651
C4M0J5	C4M0J5_ENTHI	Uncharacterized protein	EHI_024530	2	1	0	3	1	0	EQUIVALENT	1418	S0AWD7, S0AWR6
C4M0P2	C4M0P2_ENTHI	Actin, putative	EHI_008780	2	0	0	3	0	0	DISCRETE	1207
C4M3L1	C4M3L1_ENTHI	Putative uncharacterized protein	EHI_109920	2	0	0	3	0	0	DISCRETE	1297
Q6AW65	Q6AW65_ENTHI	Rab family GTPase	EhRAB7D	2	1	0	3	1	0	DISCRETE	895
C4LXL8	C4LXL8_ENTHI	Leucine-rich repeat containing protein	EHI_073580	2	0	0	3	0	0	DISCRETE	1011
Q6AW67	Q6AW67_ENTHI	Rab family GTPase	EhRAB7B	2	0	0	3	0	0	DISCRETE	1195
C4LYM6	C4LYM6_ENTHI	WD domain containing protein	EHI_118780	2	0	0	3	0	0	DISCRETE	432
C4M520	C4M520_ENTHI	Long-chain-fatty-acid--CoA ligase, putative	EHI_127830	2	0	0	3	0	0	DISCRETE	692
C4LYQ0	C4LYQ0_ENTHI	Uncharacterized protein	EHI_004370	2	1	0	3	1	0	SUPERSET	648	Q24843, S0B1P3
Q5NSY5	Q5NSY5_ENTHI	Rab family GTPase	EhRabX31	2	1	0	3	2	0	DISCRETE	438
C4LX61	C4LX61_ENTHI	Type A flavoprotein, putative	EHI_159860	1	0	0	3	0	0	DISCRETE	226
C4M4A2	C4M4A2_ENTHI	Proteasome subunit alpha type	EHI_098060	1	1	0	3	2	0	EQUIVALENT	564	C4MAW8, S0AWR8
C4M7U7	C4M7U7_ENTHI	Uncharacterized protein	EHI_020350	1	1	0	3	2	0	DISCRETE	764
Q5EHP7	Q5EHP7_ENTHI	G protein-coupled receptor 1	EHI_025100	1	1	0	3	2	0	DISCRETE	25
C4LSH0	C4LSH0_ENTHI	Rap/Ran GTPase activating protein, putative	EHI_151270	1	0	0	3	0	0	DISCRETE	874
C4M6Y3	C4M6Y3_ENTHI	20 kDa antigen, putative	EHI_056490	1	0	0	3	0	0	DISCRETE	1236
C4LUP1	C4LUP1_ENTHI	TPR repeat protein	EHI_023300	1	0	0	3	0	0	DISCRETE	1140
C4LYH1	C4LYH1_ENTHI	High mobility group (HMG) box domain containing protein	EHI_093800	1	0	0	3	0	0	DISCRETE	1004
C4M0I0	C4M0I0_ENTHI	Putative uncharacterized protein	EHI_024350	1	2	0	3	3	0	DISCRETE	126
C4M5B9	C4M5B9_ENTHI	Putative uncharacterized protein	EHI_121720	1	0	1	3	0	1	DISCRETE	52
C4M143	C4M143_ENTHI	Putative uncharacterized protein	EHI_107020	1	0	0	3	0	0	DISCRETE	602
C4M5R2	C4M5R2_ENTHI	Putative uncharacterized protein	EHI_129960	1	0	0	3	0	0	DISCRETE	1774
Q9BLF0	Q9BLF0_ENTHI	Rab family GTPase	EhRab21	1	0	0	3	0	0	DISCRETE	1682
C4M1X2	C4M1X2_ENTHI	RhoGAP domain containing protein	EHI_164790	1	0	0	3	0	0	DISCRETE	1492
Q1EPZ6	Q1EPZ6_ENTHI	EhSyntaxin H	EHI_116720	1	0	0	3	0	0	DISCRETE	989
Q5NSZ9	Q5NSZ9_ENTHI	Small GTPase EhRabX17	EhRabX17	1	0	0	3	0	0	DISCRETE	706
C4LSP0	C4LSP0_ENTHI	Histone acetyltransferase, putative	EHI_152010	2	0	0	2	0	0	DISCRETE	27
B1N3F8	B1N3F8_ENTHI	60S ribosomal protein L27a, putative	EHI_069490	2	0	0	2	0	0	SUPERSET	55	Q9BH80
C4M5Z1	C4M5Z1_ENTHI	Uncharacterized protein	EHI_181190	2	0	0	2	0	0	EQUIVALENT	211	S0AV72
C4LUQ6	C4LUQ6_ENTHI	Oxysterol binding protein, putative	EHI_023470	2	0	0	2	0	0	DISCRETE	1008
C4LUC2	C4LUC2_ENTHI	Dipeptidyl-peptidase III, putative	EHI_110750	2	0	0	2	0	0	DISCRETE	931
Q9BI08	Q9BI08_ENTHI	Vacuolar protein sorting 29	vsp	2	2	0	2	2	0	DISCRETE	1392
C4LYS1	C4LYS1_ENTHI	Phosphoribulokinase /uridine kinase family protein	EHI_004610	2	0	0	2	0	0	DISCRETE	1097
C4M5V7	C4M5V7_ENTHI	40S ribosomal protein S20, putative	EHI_026410	2	0	0	2	0	0	DIFFERENTIABLE	566
B1N420	B1N420_ENTHI	60S ribosomal protein L27a, putative	EHI_192090	2	0	0	2	0	0	EQUIVALENT	55	Q9BI14
C4M2W3	C4M2W3_ENTHI	Histone H2A	EHI_188960	2	0	0	2	0	0	DIFFERENTIABLE	1100
C4M466	C4M466_ENTHI	40S ribosomal protein S20, putative	EHI_140170	2	0	0	2	0	0	DIFFERENTIABLE	566
C4M4E1	C4M4E1_ENTHI	Putative uncharacterized protein	EHI_156420	2	2	0	2	3	0	DIFFERENTIABLE	582
C4M5D4	C4M5D4_ENTHI	Protein kinase domain containing protein	EHI_121880	2	0	0	2	0	0	DISCRETE	540
C4M021	C4M021_ENTHI	Ankyrin repeat protein, putative	EHI_134720	2	0	0	2	0	0	DISCRETE	617
C4LZI8	C4LZI8_ENTHI	HEAT repeat domain containing protein	EHI_124530	2	0	0	2	0	0	DISCRETE	1506
C4M2Y3	C4M2Y3_ENTHI	Ubiquitin-conjugating enzyme family protein	EHI_048700	2	0	0	2	0	0	DISCRETE	912
C4LSB1	C4LSB1_ENTHI	Proteasome subunit alpha type	EHI_153190	2	1	0	2	1	0	DISCRETE	1147
C4LZH1	C4LZH1_ENTHI	60S ribosomal protein L36, putative	EHI_199940	2	0	0	2	0	0	DIFFERENTIABLE	1319
B1N3B2	B1N3B2_ENTHI	LIM zinc finger domain containing protein	EHI_030800	2	0	0	2	0	0	DISCRETE	1283
C4LVR2	C4LVR2_ENTHI	Protein phosphatase domain-containing protein	EHI_186950	2	0	0	2	0	0	DISCRETE	1082
C4LX84	C4LX84_ENTHI	Dynamin-1-like protein, putative	EHI_013180	2	0	0	2	0	0	DIFFERENTIABLE	94
C4M1Y3	C4M1Y3_ENTHI	Rab family GTPase	EHI_164900	2	0	0	2	0	0	SUPERSET	277	Q5NT35
B1N3W3	B1N3W3_ENTHI	Calcium-dependent protein kinase 2, putative	EHI_137120	2	0	0	2	0	0	EQUIVALENT	324	C4LZF9, Q761X0
C4LW40	C4LW40_ENTHI	Putative uncharacterized protein	EHI_141940	2	0	0	2	0	0	DISCRETE	323
C4M2H1	C4M2H1_ENTHI	Putative uncharacterized protein	EHI_040420	2	0	0	2	0	0	DISCRETE	809
C4M9M2	C4M9M2_ENTHI	Putative uncharacterized protein	EHI_112830	2	1	0	2	1	0	DISCRETE	1493
C4LYN0	C4LYN0_ENTHI	Putative uncharacterized protein	EHI_118820	2	4	1	2	9	1	DISCRETE	47
C4LSG9	C4LSG9_ENTHI	DnaJ family protein	EHI_151260	2	0	0	2	0	0	DISCRETE	825
C4LTI2	C4LTI2_ENTHI	Proteasome subunit beta type	EHI_011870	2	1	0	2	1	0	DISCRETE	938
C4LY61	C4LY61_ENTHI	Putative uncharacterized protein	EHI_051420	2	0	0	2	0	0	DISCRETE	1539
C4M0X6	C4M0X6_ENTHI	Immuno-dominant variable surface antigen	EHI_015380	2	8	0	2	13	0	SUPERSET	569	Q05352
C4M479	C4M479_ENTHI	Putative uncharacterized protein	EHI_140310	2	4	0	2	7	0	DISCRETE	370
C4M4S8	C4M4S8_ENTHI	Mitochondrial carrier protein, putative	EHI_095150	2	0	0	2	0	0	EQUIVALENT	413	Q5VM58
C4MBI8	C4MBI8_ENTHI	Aspartyl aminopeptidase, putative	EHI_106690	2	0	0	2	0	0	EQUIVALENT	656	S0AYF2
C4LUJ3	C4LUJ3_ENTHI	Putative uncharacterized protein	EHI_049950	2	1	0	2	1	0	DISCRETE	930
B1N401	B1N401_ENTHI	Glycoprotein FP21, putative	EHI_065310	2	0	0	2	0	0	DISCRETE	888
Q9BLE9	Q9BLE9_ENTHI	Rab family GTPase	EhRab5	2	0	0	2	0	0	DISCRETE	1171
C4M3A8	C4M3A8_ENTHI	Myo-inositol monophosphatase, putative	EHI_175410	1	0	0	2	0	0	DISCRETE	105
C4LYU3	C4LYU3_ENTHI	Acyl-CoA synthetase, putative	EHI_010560	1	0	1	2	0	1	DISCRETE	444
C4M310	C4M310_ENTHI	Ubiquitin-conjugating enzyme family protein	EHI_025230	1	2	0	2	4	0	DISCRETE	717
C4LWI9	C4LWI9_ENTHI	Putative uncharacterized protein	EHI_096790	1	12	0	2	65	0	DIFFERENTIABLE	42
C4LU13	C4LU13_ENTHI	60S ribosomal protein L31, putative	EHI_068200	1	0	0	2	0	0	DIFFERENTIABLE	613
C4LSN2	C4LSN2_ENTHI	Putative uncharacterized protein	EHI_151930	1	0	1	2	0	1	DISCRETE	1358
C4LTU6	C4LTU6_ENTHI	MutT/nudix family protein	EHI_050760	1	0	0	2	0	0	DISCRETE	1505
B1N3S0	B1N3S0_ENTHI	Fumarate hydratase class I, anaerobic, putative	EHI_035060	1	0	0	2	0	0	EQUIVALENT	1302	C4MB76
C4LTT1	C4LTT1_ENTHI	Putative uncharacterized protein	EHI_050590	1	0	0	2	0	0	EQUIVALENT	1455	C4M063
C4M4S6	C4M4S6_ENTHI	Phosphatidylinositol 3-kinase, putative	EHI_095130	1	0	0	2	0	0	DISCRETE	789
C4M7Z3	C4M7Z3_ENTHI	Proteasome subunit alpha type	EHI_167720	1	0	0	2	0	0	DIFFERENTIABLE	1017
C4M2D4	C4M2D4_ENTHI	LIM zinc finger domain containing protein	EHI_158150	1	1	0	2	1	0	DISCRETE	1254
B1N4X5	B1N4X5_ENTHI	Putative uncharacterized protein	EHI_085720	1	4	0	2	6	0	EQUIVALENT	1036	C4LW18
C4LV37	C4LV37_ENTHI	Vacuolar ATP synthase subunit E, putative	EHI_182560	1	4	0	2	11	0	DISCRETE	159
C4M5L6	C4M5L6_ENTHI	Putative uncharacterized protein	EHI_122850	1	0	0	2	0	0	EQUIVALENT	863	Q1EQ32
C4M632	C4M632_ENTHI	Phosphomannomutase, putative	EHI_179810	1	0	0	2	0	0	DISCRETE	193
C4LZH9	C4LZH9_ENTHI	Zn-dependent peptidase, putative	EHI_124430	1	0	0	2	0	0	DISCRETE	1217
C4M7L1	C4M7L1_ENTHI	Inosine-uridine preferring nucleoside hydrolase, putative	EHI_199960	1	0	0	2	0	0	DISCRETE	456
B1N3M7	B1N3M7_ENTHI	rRNA biogenesis protein RRP5, putative	EHI_033670	1	0	0	2	0	0	EQUIVALENT	1189	B1N4H4, B1N5X7, C4M2T6, C4MAW0
C4LXV4	C4LXV4_ENTHI	Putative uncharacterized protein	EHI_087740	1	0	0	2	0	0	DISCRETE	1675
C4M397	C4M397_ENTHI	Nitroreductase family protein	EHI_106330	1	0	0	2	0	0	DISCRETE	1678
C4M7M0	C4M7M0_ENTHI	Putative uncharacterized protein	EHI_200070	1	0	0	2	0	0	DISCRETE	1231
C4M8M9	C4M8M9_ENTHI	Acetylornithine deacetylase, putative	EHI_114340	1	0	0	2	0	0	EQUIVALENT	1447	S0AWT9, S0B151
B1N5G3	B1N5G3_ENTHI	Cysteine proteinase, putative	EHI_010850	1	3	0	2	8	0	EQUIVALENT	1218	Q8I8E0
C4LSC4	C4LSC4_ENTHI	40S ribosomal protein S12, putative	EHI_153330	1	0	0	2	0	0	DIFFERENTIABLE	462
C4LSV8	C4LSV8_ENTHI	Eukaryotic peptide chain release factor subunit 1, putative	EHI_152750	1	0	0	2	0	0	DISCRETE	1767
C4LVH1	C4LVH1_ENTHI	Diaphanous protein, homolog 2, putative	EHI_197550	1	0	0	2	0	0	DISCRETE	1294
C4LX08	C4LX08_ENTHI	Anti-silencing protein, putative	EHI_127360	1	0	0	2	0	0	DISCRETE	546
C4LXK3	C4LXK3_ENTHI	Carbonic anhydrase, putative	EHI_073380	1	0	0	2	0	0	DISCRETE	1403
C4LZZ7	C4LZZ7_ENTHI	Radical SAM domain protein	EHI_065810	1	0	0	2	0	0	DISCRETE	1328
C4M146	C4M146_ENTHI	Putative uncharacterized protein	EHI_107050	1	0	0	2	0	0	DISCRETE	1089
C4M1G6	C4M1G6_ENTHI	Diaphanous protein, homolog 1, putative	EHI_192460	1	0	0	2	0	0	DISCRETE	1617
C4M463	C4M463_ENTHI	Gtpase activating protein, putative	EHI_140140	1	0	0	2	0	0	DISCRETE	336
Q76L90	Q76L90_ENTHI	Protein farnesyltransferase alpha subunit, putative	EhFTalpha	1	0	0	2	0	0	DISCRETE	1067
B1N4N3	B1N4N3_ENTHI	Serine/threonine-protein phosphatase 2A 65 kDa regulatory subunit A, putative	EHI_019620	1	0	0	2	0	0	EQUIVALENT	1581	C4LTQ2
C4M299	C4M299_ENTHI	Serine/threonine-protein phosphatase	EHI_136190	1	0	0	2	0	0	DISCRETE	622
C4M3Q5	C4M3Q5_ENTHI	Uncharacterized protein	EHI_146110	1	0	0	2	0	0	SUPERSET	918	S0B0K6
C4M4D1	C4M4D1_ENTHI	Ribonuclease, putative	EHI_156310	1	1	0	2	2	0	DIFFERENTIABLE	355
C4MBG5	C4MBG5_ENTHI	Putative uncharacterized protein	EHI_147230	1	0	0	2	0	0	DISCRETE	1780
C4LSK4	C4LSK4_ENTHI	RING finger protein, putative	EHI_151630	1	0	0	2	0	0	DISCRETE	1323
Q5NSZ7	Q5NSZ7_ENTHI	Rab-19, putative	EhRabX19	1	1	0	2	2	0	DISCRETE	1136
C4LZZ4	C4LZZ4_ENTHI	Putative uncharacterized protein	EHI_065780	1	0	0	2	0	0	DISCRETE	1409
C4LYD1	C4LYD1_ENTHI	V-type proton ATPase subunit F	EHI_007940	1	1	0	2	4	0	DISCRETE	1761
C4LYW9	C4LYW9_ENTHI	Putative uncharacterized protein	EHI_117850	1	0	0	2	0	0	DISCRETE	404
C4M4I6	C4M4I6_ENTHI	Putative uncharacterized protein	EHI_138950	1	1	0	2	4	0	DISCRETE	1266
C4M300	C4M300_ENTHI	Oxysterol binding protein, putative	EHI_074110	1	0	0	2	0	0	DISCRETE	1139
C4M343	C4M343_ENTHI	V-type ATPase, C subunit, putative	EHI_059840	1	2	0	2	3	0	EQUIVALENT	682	Q24810
C4M7I1	C4M7I1_ENTHI	CXXC-rich protein	EHI_111990	1	0	3	2	0	3	DISCRETE	781
C4LUZ3	C4LUZ3_ENTHI	Putative uncharacterized protein	EHI_092290	1	0	1	2	0	1	DISCRETE	1450
C4LW73	C4LW73_ENTHI	Ankyrin repeat protein, putative	EHI_155190	1	0	1	2	0	1	DISCRETE	850
B1N373	B1N373_ENTHI	U5 small nuclear ribonucleoprotein subunit, putative	EHI_021380	1	0	0	2	0	0	EQUIVALENT	1402	C4M7P1
B1N3T0	B1N3T0_ENTHI	Leucine-rich repeat containing protein	EHI_111540	1	0	0	2	0	0	DISCRETE	480
C4LSN4	C4LSN4_ENTHI	Casein kinase, putative	EHI_151950	1	0	0	2	0	0	DISCRETE	1063
C4LUT1	C4LUT1_ENTHI	Aldose reductase, putative	EHI_178670	1	0	0	2	0	0	DISCRETE	1777
C4LV22	C4LV22_ENTHI	Putative uncharacterized protein	EHI_092620	1	0	0	2	0	0	DISCRETE	1247
C4LVU5	C4LVU5_ENTHI	Transcription initiation factor SPT5, putative	EHI_187280	1	0	0	2	0	0	DISCRETE	838
C4LWZ7	C4LWZ7_ENTHI	Diphthine synthase, putative	EHI_127240	1	0	0	2	0	0	DISCRETE	1667
C4LXI4	C4LXI4_ENTHI	Uncharacterized protein	EHI_131160	1	0	0	2	0	0	SUPERSET	256	S0AWG3
C4LXJ6	C4LXJ6_ENTHI	Putative uncharacterized protein	EHI_073310	1	0	0	2	0	0	DISCRETE	1499
C4LXY2	C4LXY2_ENTHI	Uncharacterized protein	EHI_035510	1	1	0	2	2	0	DISCRETE	377
C4LY12	C4LY12_ENTHI	Sodium/sulfate symporter, putative	EHI_177580	1	0	0	2	0	0	DISCRETE	1463
C4LYD4	C4LYD4_ENTHI	Putative uncharacterized protein	EHI_007970	1	0	0	2	0	0	DISCRETE	858
C4LZ08	C4LZ08_ENTHI	Diaphanous protein, homolog 1, putative	EHI_118260	1	0	0	2	0	0	DISCRETE	853
C4LZ32	C4LZ32_ENTHI	Gelsolin repeat protein, putative	EHI_009570	1	0	0	2	0	0	DISCRETE	1739
C4LZ58	C4LZ58_ENTHI	Phosducin-like protein	EHI_104470	1	0	0	2	0	0	DISCRETE	1690
C4LZL1	C4LZL1_ENTHI	Putative uncharacterized protein	EHI_174660	1	0	0	2	0	0	DISCRETE	1797
C4LZT0	C4LZT0_ENTHI	snoRNP protein gar1, putative	EHI_194040	1	0	0	2	0	0	DISCRETE	1687
C4M0T6	C4M0T6_ENTHI	MIR domain protein	EHI_100480	1	1	0	2	1	0	DISCRETE	737
C4M573	C4M573_ENTHI	Importin alpha re-exporter, putative	EHI_111750	1	0	0	2	0	0	DISCRETE	1300
C4M636	C4M636_ENTHI	Putative uncharacterized protein	EHI_179850	1	0	0	2	0	0	DISCRETE	1396
C4M7Z8	C4M7Z8_ENTHI	Putative uncharacterized protein	EHI_167660	1	0	0	2	0	0	DISCRETE	801
C4M907	C4M907_ENTHI	Serine/threonine-protein phosphatase	EHI_147720	1	0	0	2	0	0	DISCRETE	1548
C4M9C0	C4M9C0_ENTHI	Calpain large subunit domain III containing protein	EHI_146330	1	0	0	2	0	0	DISCRETE	1511
C4MAP6	C4MAP6_ENTHI	Kinase, PfkB family	EHI_157120	1	0	0	2	0	0	DISCRETE	1735
Q3LEJ5	Q3LEJ5_ENTHI	Proton-translocating inorganic pyrophosphatase	vppII	1	0	0	2	0	0	DISCRETE	1794
Q5NSY2	Q5NSY2_ENTHI	Rab family GTPase	EhRabX34	1	0	0	2	0	0	DISCRETE	1445
B1N2G1	B1N2G1_ENTHI	Putative uncharacterized protein	EHI_152870	1	0	0	2	0	0	DISCRETE	962
C4LT46	C4LT46_ENTHI	Putative uncharacterized protein	EHI_148780	1	0	0	2	0	0	DISCRETE	1710
C4LYH7	C4LYH7_ENTHI	MIT domain protein	EHI_093860	1	0	0	2	0	0	EQUIVALENT	213	Q8I8X1
C4M0G3	C4M0G3_ENTHI	Ribulose-phosphate 3-epimerase	EHI_006900	1	0	0	2	0	0	DISCRETE	397
C4M1J0	C4M1J0_ENTHI	Putative uncharacterized protein	EHI_001100	1	0	0	2	0	0	DISCRETE	1010
C4M754	C4M754_ENTHI	Putative uncharacterized protein	EHI_192140	1	0	0	2	0	0	DISCRETE	619
C4M9M6	C4M9M6_ENTHI	3-ketoacyl-CoA synthase	EHI_112870	1	1	0	2	1	0	DISCRETE	69
C4LTJ9	C4LTJ9_ENTHI	Putative uncharacterized protein	EHI_012060	1	0	0	2	0	0	DISCRETE	1787
C4LWB9	C4LWB9_ENTHI	Putative uncharacterized protein	EHI_155700	1	0	0	2	0	0	DISCRETE	1376
C4LWN9	C4LWN9_ENTHI	Putative uncharacterized protein	EHI_069510	1	2	0	2	4	0	DISCRETE	286
C4M2F0	C4M2F0_ENTHI	Putative uncharacterized protein	EHI_158310	1	0	0	2	0	0	DISCRETE	841
C4M3T5	C4M3T5_ENTHI	B-keto acyl reductase, putative	EHI_163540	1	0	0	2	0	0	DISCRETE	1047
C4M400	C4M400_ENTHI	Putative uncharacterized protein	EHI_194850	1	0	0	2	0	0	DISCRETE	271
C4M478	C4M478_ENTHI	Putative uncharacterized protein	EHI_140300	1	0	0	2	0	0	DISCRETE	1001
C4M8G8	C4M8G8_ENTHI	Serine/threonine protein kinase, putative	EHI_063010	1	1	0	2	4	0	DISCRETE	1225
C4M942	C4M942_ENTHI	Peptidyl-prolyl cis-trans isomerase	EHI_083580	1	1	0	2	3	0	DISCRETE	1346
C4M988	C4M988_ENTHI	Putative uncharacterized protein	EHI_119940	1	0	0	2	0	0	DISCRETE	1801
C4LUK2	C4LUK2_ENTHI	Putative uncharacterized protein	EHI_022890	1	0	0	2	0	0	DISCRETE	1272
Q5NT39	Q5NT39_ENTHI	Small GTPase EhRabC5	EhRabC5	1	1	0	2	2	0	DIFFERENTIABLE	103
Q6AW62	Q6AW62_ENTHI	EhRab7G protein	EhRAB7G	1	1	0	2	2	0	DIFFERENTIABLE	277
C4M5J9	C4M5J9_ENTHI	H/ACA ribonucleoprotein complex subunit 2-like protein, putative	EHI_001850	1	0	0	2	0	0	DISCRETE	1792
Q5NT22	Q5NT22_ENTHI	Rab family GTPase	EhRabK3	1	0	0	2	0	0	DISCRETE	556
C4LSR6	C4LSR6_ENTHI	Serine palmitoyltransferase, putative	EHI_152280	1	0	0	2	0	0	DIFFERENTIABLE	727
Q9U3Z8	Q9U3Z8_ENTHI	Actinin-like protein	ALP	1	36	0	2	148	0	DIFFERENTIABLE	284
C4MA96	C4MA96_ENTHI	Ras family GTPase	EHI_198330	1	1	0	2	1	0	DISCRETE	966
C4LT56	C4LT56_ENTHI	Calmodulin, putative	EHI_148890	1	3	0	1	4	0	DIFFERENTIABLE	273
C4LV20	C4LV20_ENTHI	Vacuolar ATP synthase subunit C, putative	EHI_092600	1	8	0	1	16	0	DISCRETE	694
C4M5W4	C4M5W4_ENTHI	RNA recognition motif domain containing protein	EHI_026440	1	0	0	1	0	0	DISCRETE	482
C4LZ69	C4LZ69_ENTHI	13 kDa ribonucleoprotein-associated protein, putative	EHI_104600	1	2	0	1	4	0	DIFFERENTIABLE	62
C4M8P0	C4M8P0_ENTHI	13 kDa ribonucleoprotein-associated protein, putative	EHI_053440	1	2	0	1	4	0	DIFFERENTIABLE	62
C4LZX1	C4LZX1_ENTHI	Molybdenum cofactor sulfurase putative	EHI_194600	1	19	0	1	39	0	DISCRETE	235
C4M2C4	C4M2C4_ENTHI	Hsc70-interacting protein, putative	EHI_158050	1	2	0	1	3	0	DISCRETE	73
C4MA60	C4MA60_ENTHI	C2 domain containing protein	EHI_069950	1	28	0	1	116	0	DISCRETE	83
C4LY44	ASNA_ENTHI	ATPase ASNA1 homolog	EHI_177400	1	0	0	1	0	0	EQUIVALENT	1329	S0AVM8, S0AXE8, S0AZL3
Q2PHE2	Q2PHE2_ENTHI	Geranylgeranyltransferase II beta subunit	EhGGTIIb	1	0	0	1	0	0	DISCRETE	1130
C4M9X9	C4M9X9_ENTHI	Translation initiation factor, putative	EHI_179390	1	0	0	1	0	0	DISCRETE	279
C4M123	C4M123_ENTHI	40S ribosomal protein S26, putative	EHI_105180	1	0	0	1	0	0	DIFFERENTIABLE	731
C4MA07	C4MA07_ENTHI	Rab family GTPase	EHI_146510	1	1	0	1	1	0	DIFFERENTIABLE	277
C4M3P4	C4M3P4_ENTHI	Myosin heavy chain	EHI_140720	1	0	0	1	0	0	DISCRETE	649
C4LZS2	C4LZS2_ENTHI	40S ribosomal protein S26, putative	EHI_039010	1	0	0	1	0	0	EQUIVALENT	731	C4M7G9
C4M8A9	C4M8A9_ENTHI	60S ribosomal protein L31, putative	EHI_058080	1	0	0	1	0	0	DIFFERENTIABLE	613
C4M0F6	C4M0F6_ENTHI	Uncharacterized protein	EHI_006830	1	0	0	1	0	0	EQUIVALENT	371	S0B1G4
C4M3Z7	C4M3Z7_ENTHI	Ran GTPase-activating protein, putative	EHI_185290	1	0	0	1	0	0	DISCRETE	1132
C4M9V7	C4M9V7_ENTHI	DEAD/DEAH box helicase, putative	EHI_036900	1	0	0	1	0	0	DISCRETE	1649
C4LSX4	C4LSX4_ENTHI	Proteasome subunit beta type	EHI_148040	1	0	0	1	0	0	DISCRETE	1061
C4LVK0	C4LVK0_ENTHI	COP9 signalosome complex subunit 3, putative	EHI_103560	1	0	0	1	0	0	DISCRETE	177
C4LZZ0	C4LZZ0_ENTHI	60S ribosomal protein L30, putative	EHI_065740	1	0	0	1	0	0	DIFFERENTIABLE	631
C4M4K6	C4M4K6_ENTHI	Serine/threonine-protein phosphatase	EHI_031240	1	0	0	1	0	0	DISCRETE	1274
C4M816	C4M816_ENTHI	Putative uncharacterized protein	EHI_143550	1	0	0	1	0	0	DISCRETE	951
C4M8U8	C4M8U8_ENTHI	Putative uncharacterized protein	EHI_169670	1	0	0	1	0	0	DISCRETE	357
C4LVM7	C4LVM7_ENTHI	Proteasome regulatory subunit, putative	EHI_103850	1	0	0	1	0	0	DIFFERENTIABLE	917
C4LY71	C4LY71_ENTHI	Putative uncharacterized protein	EHI_051760	1	3	0	1	11	0	DISCRETE	215
C4LTB2	C4LTB2_ENTHI	Eukaryotic translation initiation factor 4 gamma, putative	EHI_044930	1	1	0	1	1	0	DISCRETE	1443
C4M8C8	C4M8C8_ENTHI	Rho guanine nucleotide exchange factor, putative	EHI_039480	1	0	0	1	0	0	DIFFERENTIABLE	539
B1N510	B1N510_ENTHI	T-complex protein 1 subunitTheta, putative	EHI_071600	1	0	0	1	0	0	EQUIVALENT	272	C4M3N2
C4M2N9	C4M2N9_ENTHI	Serine/threonine-protein phosphatase	EHI_006050	1	0	0	1	0	0	DISCRETE	1060
C4M0P9	C4M0P9_ENTHI	Putative uncharacterized protein	EHI_009840	1	0	0	1	0	0	DISCRETE	1081
C4M1U6	C4M1U6_ENTHI	4-methyl-5(B-hydroxyethyl)-thiazol monophosphate biosynthesis enzyme, putative	EHI_027600	1	0	0	1	0	0	DISCRETE	1102
C4M7Q6	C4M7Q6_ENTHI	Calcium-binding protein 1 (EhCBP1)	EHI_120900	1	2	0	1	2	0	EQUIVALENT	788	P38505
B1N2L8	B1N2L8_ENTHI	Heat shock protein, putative	EHI_022620	1	0	1	1	0	1	EQUIVALENT	1262	B1N3R1, B1N3X2, B1N4V0, B1N523, B1N5D4, C4LXL4, C4MB78
C4M2N7	C4M2N7_ENTHI	Deoxyhypusine synthase, putative	EHI_006030	1	0	1	1	0	1	DISCRETE	910
C4M3R9	C4M3R9_ENTHI	Protein kinase, putative	EHI_052800	1	0	1	1	0	1	DISCRETE	1049
C4M933	C4M933_ENTHI	PH-protein kinase domain containing protein	EHI_097620	1	0	1	1	0	1	DIFFERENTIABLE	833
B1N2N4	B1N2N4_ENTHI	Threonine dehydratase	EhTD1	1	1	0	1	2	0	SUPERSET	1425	C4LVZ3
B1N4N4	B1N4N4_ENTHI	Caldesmon, putative	EHI_019640	1	0	0	1	0	0	DIFFERENTIABLE	101
C4LSG5	C4LSG5_ENTHI	Putative uncharacterized protein	EHI_151220	1	0	0	1	0	0	DISCRETE	1638
C4LT54	C4LT54_ENTHI	Putative uncharacterized protein	EHI_148870	1	0	0	1	0	0	DISCRETE	1052
C4LU55	C4LU55_ENTHI	Putative uncharacterized protein	EHI_068650	1	0	0	1	0	0	DISCRETE	136
C4LW39	C4LW39_ENTHI	Protein kinase, putative	EHI_141930	1	0	0	1	0	0	DISCRETE	1569
C4LW78	C4LW78_ENTHI	Putative uncharacterized protein	EHI_155250	1	0	0	1	0	0	DISCRETE	238
C4LWC1	C4LWC1_ENTHI	Putative uncharacterized protein	EHI_155720	1	3	0	1	6	0	DISCRETE	236
C4LXC4	C4LXC4_ENTHI	Pyruvate kinase	EHI_098420	1	0	0	1	0	0	DISCRETE	1544
C4M1A7	C4M1A7_ENTHI	Putative uncharacterized protein	EHI_169840	1	0	0	1	0	0	DISCRETE	925
C4M298	C4M298_ENTHI	Proteasome regulatory subunit, putative	EHI_136180	1	0	0	1	0	0	DISCRETE	977
C4M378	C4M378_ENTHI	Putative uncharacterized protein	EHI_086230	1	1	0	1	1	0	DISCRETE	1241
C4M6A9	C4M6A9_ENTHI	DEAD/DEAH box helicase, putative	EHI_082600	1	0	0	1	0	0	DISCRETE	886
C4M7A6	C4M7A6_ENTHI	Zinc finger protein, putative	EHI_055640	1	0	0	1	0	0	DISCRETE	515
C4M7G3	C4M7G3_ENTHI	Protein kinase, putative	EHI_158590	1	0	0	1	0	0	DISCRETE	1107
C4M8V6	C4M8V6_ENTHI	Prefoldin subunit 2, putative	EHI_113900	1	0	0	1	0	0	DISCRETE	1312
C4M9W7	C4M9W7_ENTHI	Putative uncharacterized protein	EHI_129340	1	0	0	1	0	0	DISCRETE	1066
C4M0C2	C4M0C2_ENTHI	Type A flavoprotein, putative	EHI_064530	1	0	1	1	0	1	DIFFERENTIABLE	372
C4LSY7	C4LSY7_ENTHI	Serine/threonine-protein phosphatase 2A 55 kDa regulatory subunit B	EHI_148170	1	0	0	1	0	0	DISCRETE	1277
C4LUC1	C4LUC1_ENTHI	Putative uncharacterized protein	EHI_110740	1	0	0	1	0	0	DISCRETE	658
C4LVP6	C4LVP6_ENTHI	Putative uncharacterized protein	EHI_186790	1	0	0	1	0	0	DISCRETE	1360
C4LVU4	C4LVU4_ENTHI	Putative uncharacterized protein	EHI_187270	1	0	0	1	0	0	DISCRETE	948
C4LW81	C4LW81_ENTHI	Serine/threonine-protein kinase DCAMKL3, putative	EHI_155280	1	0	0	1	0	0	DISCRETE	1031
C4LWF4	C4LWF4_ENTHI	Putative uncharacterized protein	EHI_096410	1	0	0	1	0	0	DISCRETE	1406
C4LZ01	C4LZ01_ENTHI	Cullin, putative	EHI_118180	1	0	0	1	0	0	DISCRETE	1429
C4M426	C4M426_ENTHI	Putative uncharacterized protein	EHI_114190	1	0	0	1	0	0	DISCRETE	1046
C4M491	C4M491_ENTHI	MuT/nudix family protein	EHI_097930	1	0	0	1	0	0	DISCRETE	1353
C4M6P9	C4M6P9_ENTHI	Leukocyte-endothelial cell adhesion molecule 3, putative	EHI_201200	1	0	0	1	0	0	DIFFERENTIABLE	333
C4M6X1	C4M6X1_ENTHI	Nucleosome assembly protein, putative	EHI_139460	1	0	0	1	0	0	DISCRETE	937
C4M981	C4M981_ENTHI	HEAT repeat domain containing protein	EHI_124870	1	0	0	1	0	0	DISCRETE	1377
C4M9L9	C4M9L9_ENTHI	Putative uncharacterized protein	EHI_112800	1	0	0	1	0	0	DISCRETE	629
Q8I8X6	Q8I8X6_ENTHI	Putative uncharacterized protein	EHI_111070	1	0	0	1	0	0	DISCRETE	1439
C4LSH8	C4LSH8_ENTHI	Putative uncharacterized protein	EHI_151360	1	0	0	1	0	0	DISCRETE	684
C4LU44	C4LU44_ENTHI	Putative uncharacterized protein	EHI_068530	1	0	0	1	0	0	EQUIVALENT	699	C4M3G1
C4LWK6	C4LWK6_ENTHI	Rho GTPase activating protein, putative	EHI_069180	1	1	0	1	3	0	DISCRETE	1715
C4M007	C4M007_ENTHI	ATP-binding cassette protein, putative	EHI_134470	1	0	0	1	0	0	DIFFERENTIABLE	940
C4M2M2	C4M2M2_ENTHI	Proteasome regulatory subunit, putative	EHI_005870	1	0	0	1	0	0	DISCRETE	290
C4M3Y9	C4M3Y9_ENTHI	Signal recognition particle receptor alpha subunit, putative	EHI_200840	1	1	0	1	1	0	DISCRETE	647
C4M698	C4M698_ENTHI	Putative uncharacterized protein	EHI_081710	1	0	0	1	0	0	DISCRETE	1364
C4M6F9	C4M6F9_ENTHI	60S ribosomal protein L38, putative	EHI_099790	1	0	0	1	0	0	EQUIVALENT	659	C4M7I6
C4MA42	C4MA42_ENTHI	Uncharacterized protein	EHI_166030	1	0	0	1	0	0	DISCRETE	877
C4MB98	C4MB98_ENTHI	Calmodulin, putative	EHI_000130	1	1	0	1	1	0	DISCRETE	1144
C4LUJ2	C4LUJ2_ENTHI	Ubiquitin carboxyl-terminal hydrolase	EHI_049940	1	0	0	1	0	0	DISCRETE	483
C4LZ27	C4LZ27_ENTHI	TBC domain containing protein	EHI_009510	1	0	0	1	0	0	DISCRETE	544
C4M1J2	C4M1J2_ENTHI	Putative uncharacterized protein	EHI_001120	1	0	0	1	0	0	DISCRETE	1731
C4M2F7	C4M2F7_ENTHI	Eukaryotic translation initiation factor 4E, putative	EHI_040280	1	0	0	1	0	0	DISCRETE	1092
C4M3D8	C4M3D8_ENTHI	Uncharacterized protein	EHI_095810	1	0	0	1	0	0	DISCRETE	1249
C4M666	C4M666_ENTHI	Initiation factor eIF-2B delta subunit, putative	EHI_042980	1	0	0	1	0	0	DISCRETE	31
C4LVN5	C4LVN5_ENTHI	Glucosamine 6-phosphate N-acetyltransferase. putative	EHI_186340	1	0	0	1	0	0	DISCRETE	1013
C4LX40	C4LX40_ENTHI	Cysteine protease inhibitor 1 (EhICP1)	EHI_159600	1	0	0	1	0	0	EQUIVALENT	1271	Q6KCA4
C4MAU7	C4MAU7_ENTHI	Eukaryotic translation initiation factor 2 gamma subunit, putative	EHI_132880	1	0	0	1	0	0	DISCRETE	1242
C4LV09	C4LV09_ENTHI	60S ribosomal protein L40, putative	EHI_092470	1	0	0	1	0	0	DISCRETE	1252
C4LW27	C4LW27_ENTHI	Putative uncharacterized protein	EHI_141800	1	1	0	1	1	0	DISCRETE	1289
B1N3J0	B1N3J0_ENTHI	Rab family GTPase	EHI_059670	1	0	0	1	0	0	SUPERSET	277	Q9BLF1
Q9BLE6	Q9BLE6_ENTHI	Rab family GTPase	EhRabF5	1	0	0	1	0	0	DIFFERENTIABLE	600
C4M2E3	C4M2E3_ENTHI	3-ketoacyl-CoA synthase	EHI_158240	1	2	0	1	2	0	DIFFERENTIABLE	106
C4LSA7	C4LSA7_ENTHI	RhoGAP domain containing protein	EHI_153150	1	0	1	1	0	2	DISCRETE	793
C4LS87	C4LS87_ENTHI	Putative uncharacterized protein	EHI_152940	1	0	1	1	0	1	DISCRETE	1395
C4M0B6	C4M0B6_ENTHI	Heat shock protein 70, putative	EHI_064470	1	0	1	1	0	1	DISCRETE	334
C4M0V2	C4M0V2_ENTHI	Multidrug resistance protein, putative	EHI_100320	1	1	1	1	3	1	DISCRETE	529
Q9U7F6	Q9U7F6_ENTHI	Adhesin 112 (EhADH112)	adh112	1	0	1	1	0	1	DISCRETE	553
C4LXG8	C4LXG8_ENTHI	Putative uncharacterized protein	EHI_131000	1	0	1	1	0	1	DIFFERENTIABLE	560
A1A491	A1A491_ENTHI	Ameobapore C		1	0	0	1	0	0	EQUIVALENT	1523	A1A492, C4LZ09, Q24825, Q76N77
B1N2X2	B1N2X2_ENTHI	Putative uncharacterized protein	EHI_164740	1	0	0	1	0	0	DISCRETE	1228
B1N3S7	B1N3S7_ENTHI	Putative uncharacterized protein	EHI_128170	1	0	0	1	0	0	DISCRETE	1645
B1N435	B1N435_ENTHI	Putative uncharacterized protein	EHI_035990	1	0	0	1	0	0	DISCRETE	1745
B1N4D7	B1N4D7_ENTHI	Putative uncharacterized protein	EHI_025870	1	0	0	1	0	0	DISCRETE	1560
B1N557	B1N557_ENTHI	Putative uncharacterized protein	EHI_048420	1	0	0	1	0	0	DISCRETE	1388
B1N5I9	B1N5I9_ENTHI	Rac-like GTP-binding protein RAC2, putative	EHI_013650	1	0	0	1	0	0	DISCRETE	808
B1N5K8	B1N5K8_ENTHI	Putative uncharacterized protein	EHI_063140	1	0	0	1	0	0	EQUIVALENT	1570	C4M100
C4LSF7	C4LSF7_ENTHI	Phosphatidylinositol-4-phosphate 5-kinase, putative	EHI_153770	1	0	0	1	0	0	DISCRETE	745
C4LT23	C4LT23_ENTHI	Leucine rich repeat protein, BspA family	EHI_148530	1	0	0	1	0	0	DISCRETE	623
C4LT24	C4LT24_ENTHI	Putative uncharacterized protein	EHI_148540	1	0	0	1	0	0	DISCRETE	855
C4LTE5	C4LTE5_ENTHI	Vacuolar protein sorting 36, putative	EHI_045320	1	0	0	1	0	0	DISCRETE	1516
C4LTF0	C4LTF0_ENTHI	Putative uncharacterized protein	EHI_045370	1	0	0	1	0	0	DISCRETE	1449
C4LTS3	C4LTS3_ENTHI	Putative uncharacterized protein	EHI_050500	1	0	0	1	0	0	DISCRETE	1528
C4LTW8	C4LTW8_ENTHI	Putative uncharacterized protein	EHI_050980	1	0	0	1	0	0	DISCRETE	1768
C4LU33	C4LU33_ENTHI	Putative uncharacterized protein	EHI_068410	1	0	0	1	0	0	DISCRETE	769
C4LU53	C4LU53_ENTHI	HEAT repeat domain containing protein	EHI_068630	1	0	0	1	0	0	DIFFERENTIABLE	1456
C4LU58	C4LU58_ENTHI	Nucleolar phosphoprotein Nopp34, putative	EHI_068680	1	0	0	1	0	0	DISCRETE	1755
C4LU60	C4LU60_ENTHI	Putative uncharacterized protein	EHI_068700	1	0	0	1	0	0	DISCRETE	1742
C4LUD5	C4LUD5_ENTHI	Proteasome subunit beta type	EHI_049330	1	0	0	1	0	0	DISCRETE	1636
C4LUI3	C4LUI3_ENTHI	Putative uncharacterized protein	EHI_049850	1	0	0	1	0	0	DISCRETE	1508
C4LUN0	C4LUN0_ENTHI	Exonuclease I, putative	EHI_023190	1	0	0	1	0	0	DISCRETE	828
C4LUN7	C4LUN7_ENTHI	Nicotinate phosphoribosyltransferase, putative	EHI_023260	1	0	0	1	0	0	DISCRETE	522
C4LUS0	C4LUS0_ENTHI	Calmodulin, putative	EHI_178540	1	0	0	1	0	0	DISCRETE	1721
C4LUS8	C4LUS8_ENTHI	Putative uncharacterized protein	EHI_178630	1	0	0	1	0	0	DISCRETE	1459
C4LUV3	C4LUV3_ENTHI	Putative uncharacterized protein	EHI_178890	1	0	0	1	0	0	DISCRETE	1631
C4LUW0	C4LUW0_ENTHI	Putative uncharacterized protein	EHI_178970	1	0	0	1	0	0	DIFFERENTIABLE	1341
C4LV19	C4LV19_ENTHI	Putative uncharacterized protein	EHI_092580	1	0	0	1	0	0	DISCRETE	1512
C4LV33	C4LV33_ENTHI	DNAJ homolog subfamily A member 1, putative	EHI_182520	1	0	0	1	0	0	DISCRETE	200
C4LV54	C4LV54_ENTHI	Uncharacterized protein	EHI_182730	1	0	0	1	0	0	DISCRETE	1065
C4LVI0	C4LVI0_ENTHI	Putative uncharacterized protein	EHI_103360	1	0	0	1	0	0	DISCRETE	1622
C4LVI6	C4LVI6_ENTHI	Putative uncharacterized protein	EHI_103420	1	0	0	1	0	0	DISCRETE	1764
C4LVQ4	C4LVQ4_ENTHI	Putative uncharacterized protein	EHI_186870	1	0	0	1	0	0	DISCRETE	1109
C4LWJ0	C4LWJ0_ENTHI	Putative uncharacterized protein	EHI_096800	1	0	0	1	0	0	DISCRETE	1333
C4LX94	C4LX94_ENTHI	Putative uncharacterized protein	EHI_013280	1	0	0	1	0	0	DISCRETE	1420
C4LXH0	C4LXH0_ENTHI	Translation initiation factor eIF-2B epsilon subunit, putative	EHI_131020	1	0	0	1	0	0	DISCRETE	504
C4LXV1	C4LXV1_ENTHI	Putative uncharacterized protein	EHI_087710	1	0	0	1	0	0	DISCRETE	507
C4LXY5	C4LXY5_ENTHI	Regulator of nonsense transcripts, putative	EHI_035550	1	0	0	1	0	0	DISCRETE	1096
C4LY81	C4LY81_ENTHI	Protein kinase domain containing protein	EHI_051900	1	0	0	1	0	0	DISCRETE	1309
C4LYH0	C4LYH0_ENTHI	Dolychil-diphosphooligosaccharide--protein glycosyltransferase subunit, putative	EHI_093790	1	0	0	1	0	0	DIFFERENTIABLE	758
C4LYK2	C4LYK2_ENTHI	Putative uncharacterized protein	EHI_118400	1	0	0	1	0	0	DISCRETE	1134
C4LYX0	C4LYX0_ENTHI	Putative uncharacterized protein	EHI_117860	1	0	0	1	0	0	DISCRETE	1579
C4LZN4	C4LZN4_ENTHI	Ribosome biogenesis protein, putative	EHI_175090	1	0	0	1	0	0	EQUIVALENT	1156	S0AWR7
C4LZX4	C4LZX4_ENTHI	Protein with RhoGEF and ArfGAP domains	EHI_194630	1	0	0	1	0	0	DISCRETE	773
C4M177	C4M177_ENTHI	Putative uncharacterized protein	EHI_188030	1	0	0	1	0	0	DISCRETE	1699
C4M196	C4M196_ENTHI	Putative uncharacterized protein	EHI_188220	1	0	0	1	0	0	DISCRETE	933
C4M1M8	C4M1M8_ENTHI	Putative uncharacterized protein	EHI_133990	1	0	0	1	0	0	DISCRETE	476
C4M1U8	C4M1U8_ENTHI	Putative uncharacterized protein	EHI_027620	1	0	0	1	0	0	DISCRETE	1477
C4M1Z3	C4M1Z3_ENTHI	DEAD/DEAH box helicase, putative	EHI_165110	1	0	0	1	0	0	DISCRETE	1785
C4M1Z5	C4M1Z5_ENTHI	Putative uncharacterized protein	EHI_165130	1	0	0	1	0	0	DISCRETE	1656
C4M247	C4M247_ENTHI	Ribonuclease, putative	EHI_169300	1	1	0	1	2	0	DIFFERENTIABLE	355
C4M2P9	C4M2P9_ENTHI	Putative uncharacterized protein	EHI_006150	1	0	0	1	0	0	DISCRETE	1340
C4M2X1	C4M2X1_ENTHI	Putative uncharacterized protein	EHI_048580	1	0	0	1	0	0	DISCRETE	1339
C4M324	C4M324_ENTHI	Putative uncharacterized protein	EHI_025370	1	0	0	1	0	0	DISCRETE	1498
C4M345	C4M345_ENTHI	Putative uncharacterized protein	EHI_059870	1	0	0	1	0	0	DISCRETE	129
C4M3D9	C4M3D9_ENTHI	ATP-binding cassette, putative	EHI_095820	1	0	0	1	0	0	EQUIVALENT	1106	C4M558
C4M3N9	C4M3N9_ENTHI	DNA replication licensing factor, putative	EHI_140670	1	0	0	1	0	0	DISCRETE	1637
C4M3X9	C4M3X9_ENTHI	Phospholipase, patatin family protein	EHI_200740	1	0	0	1	0	0	DISCRETE	1338
C4M3Y5	C4M3Y5_ENTHI	Putative uncharacterized protein	EHI_200800	1	0	0	1	0	0	DISCRETE	1146
C4M484	C4M484_ENTHI	Putative uncharacterized protein	EHI_140360	1	0	0	1	0	0	DISCRETE	1050
C4M4F0	C4M4F0_ENTHI	Putative uncharacterized protein	EHI_078580	1	0	0	1	0	0	DISCRETE	1350
C4M550	C4M550_ENTHI	Putative uncharacterized protein	EHI_078310	1	0	0	1	0	0	DISCRETE	1688
C4M581	C4M581_ENTHI	Putative uncharacterized protein	EHI_111830	1	0	0	1	0	0	DISCRETE	1002
C4M596	C4M596_ENTHI	Putative uncharacterized protein	EHI_154330	1	0	0	1	0	0	DIFFERENTIABLE	414
C4M5C8	C4M5C8_ENTHI	Putative uncharacterized protein	EHI_121820	1	0	0	1	0	0	DISCRETE	1440
C4M5D7	C4M5D7_ENTHI	Acyl-coA synthetase, putative	EHI_131880	1	0	0	1	0	0	DISCRETE	1738
C4M5K5	C4M5K5_ENTHI	Ras GTPase-activating protein, putative	EHI_001910	1	0	0	1	0	0	DISCRETE	394
C4M5P4	C4M5P4_ENTHI	Putative uncharacterized protein	EHI_040650	1	0	0	1	0	0	DISCRETE	1170
C4M5Y0	C4M5Y0_ENTHI	Putative uncharacterized protein	EHI_137050	1	0	0	1	0	0	DISCRETE	1441
C4M5Z8	C4M5Z8_ENTHI	Protein kinase domain containing protein	EHI_181260	1	0	0	1	0	0	DISCRETE	1788
C4M629	C4M629_ENTHI	Putative uncharacterized protein	EHI_125390	1	0	0	1	0	0	DISCRETE	1604
C4M6G6	C4M6G6_ENTHI	Putative uncharacterized protein	EHI_099860	1	0	0	1	0	0	DISCRETE	1563
C4M6V4	C4M6V4_ENTHI	SWIRM domain protein	EHI_170610	1	0	0	1	0	0	DISCRETE	1680
C4M729	C4M729_ENTHI	Putative uncharacterized protein	EHI_183500	1	0	0	1	0	0	DISCRETE	964
C4M783	C4M783_ENTHI	Putative uncharacterized protein	EHI_044360	1	0	0	1	0	0	DISCRETE	873
C4M7Q3	C4M7Q3_ENTHI	Putative uncharacterized protein	EHI_120870	1	0	0	1	0	0	DISCRETE	1651
C4M7W7	C4M7W7_ENTHI	Cytosolic Fe-S cluster assembly factor NUBP1 homolog	EHI_047750	1	0	0	1	0	0	DISCRETE	878
C4M8B6	C4M8B6_ENTHI	Serine/threonine-protein kinase, putative	EHI_101250	1	0	0	1	0	0	DISCRETE	935
C4M8C5	C4M8C5_ENTHI	Putative uncharacterized protein	EHI_039330	1	0	0	1	0	0	DISCRETE	1468
C4M8E5	C4M8E5_ENTHI	Putative uncharacterized protein	EHI_115340	1	0	0	1	0	0	DISCRETE	1209
C4M8I8	C4M8I8_ENTHI	Phosphomannose isomerase, putative	EHI_162210	1	0	0	1	0	0	DISCRETE	1054
C4M8N5	C4M8N5_ENTHI	Putative uncharacterized protein	EHI_077530	1	3	0	1	6	0	DISCRETE	559
C4M8R5	C4M8R5_ENTHI	Putative uncharacterized protein	EHI_181530	1	0	0	1	0	0	DISCRETE	384
C4M8V7	C4M8V7_ENTHI	Putative uncharacterized protein	EHI_113910	1	1	0	1	2	0	DISCRETE	1062
C4M9R0	C4M9R0_ENTHI	Putative uncharacterized protein	EHI_196380	1	0	0	1	0	0	DISCRETE	718
C4M9T7	C4M9T7_ENTHI	Rho family GTPase	EHI_190440	1	0	0	1	0	0	DISCRETE	81
C4M9V6	C4M9V6_ENTHI	ATPase, Vps4 oligomerisation domain containing protein	EHI_036890	1	0	0	1	0	0	DISCRETE	1519
C4MA45	C4MA45_ENTHI	Putative uncharacterized protein	EHI_067090	1	2	0	1	4	0	DISCRETE	254
C4MA51	C4MA51_ENTHI	Putative uncharacterized protein	EHI_172500	1	0	0	1	0	0	DISCRETE	1362
C4MA75	C4MA75_ENTHI	Protein kinase, putative	EHI_075190	1	0	0	1	0	0	DISCRETE	1545
C4MAI1	C4MAI1_ENTHI	Ras family GTPase	EHI_196530	1	0	0	1	0	0	DISCRETE	1356
C4MB25	C4MB25_ENTHI	Sodium/hydrogen exchanger	EHI_176180	1	0	0	1	0	0	DISCRETE	1337
C4MBQ3	C4MBQ3_ENTHI	Putative uncharacterized protein	EHI_053320	1	1	0	1	1	0	DISCRETE	1306
Q1EPX9	Q1EPX9_ENTHI	Sec1 family protein	EHI_000910	1	0	0	1	0	0	DISCRETE	362
Q1EQ31	Q1EQ31_ENTHI	Coatomer alpha subunit, putative	EHI_088090	1	0	0	1	0	0	DISCRETE	452
Q1EQ36	Q1EQ36_ENTHI	Coatomer subunit gamma	EHI_040700	1	0	0	1	0	0	DISCRETE	1216
Q5NSX9	Q5NSX9_ENTHI	GTP-binding protein EhRabX36, putative	EhRabX36	1	0	0	1	0	0	DISCRETE	143
Q9U593	Q9U593_ENTHI	Dipeptidyl-peptidase, putative	dpp	1	2	0	1	3	0	DIFFERENTIABLE	643
C4M8B8	C4M8B8_ENTHI	Protein tyrosine kinase domain-containing protein	EHI_101280	1	0	1	1	0	1	DIFFERENTIABLE	1336
C4LSC0	C4LSC0_ENTHI	Putative uncharacterized protein	EHI_153290	1	0	0	1	0	0	DISCRETE	913
C4LUW5	C4LUW5_ENTHI	Putative uncharacterized protein	EHI_179020	1	0	0	1	0	0	DISCRETE	461
C4LV51	C4LV51_ENTHI	Putative uncharacterized protein	EHI_182700	1	0	0	1	0	0	DISCRETE	1590
C4LVW1	C4LVW1_ENTHI	Oxidoreductase, putative	EHI_125740	1	1	0	1	1	0	DISCRETE	748
C4LZ82	C4LZ82_ENTHI	Uncharacterized protein	EHI_104740	1	0	0	1	0	0	DISCRETE	1229
C4LZ98	C4LZ98_ENTHI	Putative uncharacterized protein	EHI_000470	1	0	0	1	0	0	DISCRETE	1380
C4M0I5	C4M0I5_ENTHI	Putative uncharacterized protein	EHI_024430	1	0	0	1	0	0	DISCRETE	1574
C4M104	C4M104_ENTHI	Iron-sulfur flavoprotein, putative	EHI_135180	1	0	0	1	0	0	DISCRETE	945
C4M1B9	C4M1B9_ENTHI	Putative uncharacterized protein	EHI_169970	1	0	0	1	0	0	DISCRETE	1355
C4M1S2	C4M1S2_ENTHI	Ubiquitin-conjugating enzyme family protein	EHI_164400	1	0	0	1	0	0	DISCRETE	1256
C4M6Y9	C4M6Y9_ENTHI	V-type ATPase, D subunit, putative	EHI_056390	1	5	0	1	10	0	DISCRETE	206
B1N2P1	B1N2P1_ENTHI	Putative uncharacterized protein	EHI_182980	1	1	0	1	1	0	DIFFERENTIABLE	923
B1N2S2	B1N2S2_ENTHI	Calmodulin, putative	EHI_117470	1	0	0	1	0	0	DISCRETE	1187
B1N3D5	B1N3D5_ENTHI	Leucine-rich repeat containing protein	EHI_164460	1	0	0	1	0	0	DISCRETE	220
C4LUL1	C4LUL1_ENTHI	Ubiquitin-like protein	EHI_022980	1	1	0	1	1	0	DISCRETE	1704
C4M2T9	C4M2T9_ENTHI	Uncharacterized protein	EHI_188720	1	1	0	1	1	0	SUPERSET	923	S0AXE4, S0AXU9, S0AY25
C4M5U0	C4M5U0_ENTHI	Coronin	EHI_082080	1	0	0	1	0	0	DISCRETE	208
C4M7P6	C4M7P6_ENTHI	Putative uncharacterized protein	EHI_091090	1	0	0	1	0	0	DISCRETE	378
C4M8T2	C4M8T2_ENTHI	Long-chain-fatty-acid--CoA ligase, putative	EHI_147010	1	1	0	1	2	0	DIFFERENTIABLE	655
Q9NDI3	Q9NDI3_ENTHI	Rab B GTPase	rabB	1	1	0	1	2	0	DIFFERENTIABLE	1318
B1N3Z3	B1N3Z3_ENTHI	Putative uncharacterized protein	EHI_145610	1	0	0	1	0	0	DIFFERENTIABLE	517
C4LWN1	C4LWN1_ENTHI	Dolichyl-di-phosphooligosaccharide-protein glycotransferase, putative	EHI_069430	1	1	0	1	1	0	EQUIVALENT	711	C4M4V6
C4M2H3	C4M2H3_ENTHI	Cysteine protease binding protein family 7	cpbf7	1	4	0	1	6	0	DISCRETE	552
Q1EPY3	Q1EPY3_ENTHI	Syntaxin binding protein, putative	EHI_093130	1	0	0	1	0	0	DISCRETE	701
C4LV75	C4LV75_ENTHI	Histone H2B	EHI_188730	1	0	0	1	0	0	EQUIVALENT	1689	O15582
C4M1A5	C4M1A5_ENTHI	SNF7 family protein	EHI_169820	1	0	0	1	0	0	DISCRETE	861
Q5NT18	Q5NT18_ENTHI	Small GTPase EhRabM3	EhRabM3	1	0	0	1	0	0	DISCRETE	992
C4LW92	C4LW92_ENTHI	40S ribosomal protein S11, putative	EHI_155410	0	1	0	0	1	0	DIFFERENTIABLE	652
C4M3N7	C4M3N7_ENTHI	Putative transcription enhancer protein	EHI_140650	0	0	1	0	0	1	DISCRETE	705
Q6R3G0	Q6R3G0_ENTHI	Calcium binding protein 2	EHI_010020	0	1	0	0	1	0	DIFFERENTIABLE	574
C4M7U2	C4M7U2_ENTHI	Ribosomal protein L15	EHI_040800	0	1	0	0	1	0	EQUIVALENT	685	S0B0W5
B1N4A1	B1N4A1_ENTHI	Grainin, putative	EHI_120360	0	9	0	0	22	0	DIFFERENTIABLE	88
C4M653	C4M653_ENTHI	Histidyl-tRNA synthetase, putative	EHI_180020	0	0	1	0	0	1	DISCRETE	67
C4LZU7	C4LZU7_ENTHI	Autophagy-related protein 3	EHI_194330	0	0	1	0	0	1	DISCRETE	28
C4MAJ3	C4MAJ3_ENTHI	Ras guanine nucleotide exchange factor, putative	EHI_143100	0	0	1	0	0	1	DISCRETE	1345
C4M8Z0	C4M8Z0_ENTHI	Alkyl sulfatase, putative	EHI_086530	0	0	1	0	0	15	DISCRETE	1120
C4LXA6	C4LXA6_ENTHI	Putative uncharacterized protein	EHI_098230	0	0	1	0	0	2	DISCRETE	666
B1N3W9	B1N3W9_ENTHI	Glutamine synthetase, putative	EHI_125180	0	0	1	0	0	1	DIFFERENTIABLE	1367
C4M6R5	C4M6R5_ENTHI	Ribosomal RNA methyltransferase, putative	EHI_088070	0	0	1	0	0	1	DISCRETE	440
Q1EQ34	Q1EQ34_ENTHI	Delta1-COP		0	0	1	0	0	1	DIFFERENTIABLE	119
Q4QT07	Q4QT07_ENTHI	Rab GTPase		0	1	1	0	2	1	DIFFERENTIABLE	1318
B1N4L5	B1N4L5_ENTHI	Putative uncharacterized protein	EHI_129370	0	1	0	0	1	0	DISCRETE	1382
C4LT85	C4LT85_ENTHI	Protein kinase, putative	EHI_044640	0	1	0	0	2	0	DISCRETE	916
C4LTN5	C4LTN5_ENTHI	Helicase domain-containing protein	EHI_012470	0	1	0	0	1	0	DISCRETE	1576
C4M3N5	C4M3N5_ENTHI	Putative uncharacterized protein	EHI_140630	0	1	0	0	1	0	DISCRETE	1361
C4M741	C4M741_ENTHI	Cortexillin, putative	EHI_191900	0	2	0	0	4	0	DISCRETE	1299
C4MBD9	C4MBD9_ENTHI	Putative uncharacterized protein	EHI_053850	0	1	0	0	1	0	DISCRETE	1502
C4LU65	C4LU65_ENTHI	Vacuolar ATP synthase subunit H, putative	EHI_068750	0	6	0	0	14	0	DISCRETE	225
C4LW82	C4LW82_ENTHI	Actinin-like protein, putative	EHI_155290	0	1	0	0	1	0	DISCRETE	1642
C4LZH6	C4LZH6_ENTHI	Thioredoxin, putative	EHI_124400	0	2	0	0	2	0	DISCRETE	687
C4LZJ2	C4LZJ2_ENTHI	UDP-N-acetylglucosamine transporter, putative	EHI_124580	0	1	0	0	1	0	DISCRETE	1457
C4M1T1	C4M1T1_ENTHI	Sec61 alpha subunit, putative	EHI_164500	0	1	0	0	1	0	SUPERSET	610	Q5XWC1
Q1EQ22	Q1EQ22_ENTHI	AP-2 complex protein, putative	EHI_045710	0	1	0	0	2	0	DISCRETE	1086
C4M515	C4M515_ENTHI	HEAT repeat domain containing protein	EHI_141090	0	1	1	0	3	1	DISCRETE	1037
C4M3A9	C4M3A9_ENTHI	Putative uncharacterized protein	EHI_175420	0	1	0	0	2	0	DISCRETE	1357
Q1EQ40	Q1EQ40_ENTHI	EhEmp24D	EHI_038590	0	1	0	0	2	0	DISCRETE	1069
C4M4Q8	C4M4Q8_ENTHI	Nuclear transcription factor, putative	EHI_168220	0	0	1	0	0	29	DISCRETE	1246
C4M6B9	C4M6B9_ENTHI	Putative uncharacterized protein	EHI_099260	0	0	1	0	0	23	DISCRETE	1730
B1N624	B1N624_ENTHI	Aminoglycoside 3'-phosphotransferase , putative	EHI_117050	0	0	4	0	0	16	DISCRETE	531
C4MBE9	C4MBE9_ENTHI	Putative uncharacterized protein	EHI_137370	0	0	2	0	0	12	DISCRETE	1021
C4M1F3	C4M1F3_ENTHI	Putative uncharacterized protein	EHI_030850	0	0	1	0	0	11	DISCRETE	1584
C4M977	C4M977_ENTHI	Putative uncharacterized protein	EHI_124830	0	0	1	0	0	11	DISCRETE	149
C4LW71	C4LW71_ENTHI	DNA mismatch repair protein PMS1, putative	EHI_155170	0	0	1	0	0	7	DISCRETE	1658
C4LX70	C4LX70_ENTHI	Putative uncharacterized protein	EHI_012990	0	0	1	0	0	5	DISCRETE	1387
C4M4W5	C4M4W5_ENTHI	Putative uncharacterized protein	EHI_029030	0	0	1	0	0	5	DISCRETE	876
C4LYB9	C4LYB9_ENTHI	Putative uncharacterized protein	EHI_007470	0	0	1	0	0	4	DISCRETE	1462
C4M2G7	C4M2G7_ENTHI	Putative uncharacterized protein	EHI_040380	0	0	1	0	0	4	DISCRETE	1514
B1N3D1	B1N3D1_ENTHI	Tyrosine-protein kinase 2, putative	EHI_062810	0	0	1	0	0	3	EQUIVALENT	1727	B1N4T5, C4LUZ4, C4LXM6, C4M4X4
B9U2P3	B9U2P3_ENTHI	Organellar DNA polymerase 1	odp1	0	0	2	0	0	3	DISCRETE	714
C4LV85	C4LV85_ENTHI	Centromeric protein E, putative	EHI_183120	0	0	2	0	0	3	DIFFERENTIABLE	505
C4LVQ7	C4LVQ7_ENTHI	Putative uncharacterized protein	EHI_186900	0	0	1	0	0	3	EQUIVALENT	1263	C4M338, S0AW41
C4LWL7	C4LWL7_ENTHI	Protein kinase, putative	EHI_069290	0	0	1	0	0	3	DISCRETE	184
C4LXX4	C4LXX4_ENTHI	Putative uncharacterized protein	EHI_035430	0	0	2	0	0	3	DISCRETE	91
C4LY17	C4LY17_ENTHI	Uncharacterized protein	EHI_177640	0	0	1	0	0	3	EQUIVALENT	1182	S0AXT7
C4LYT7	C4LYT7_ENTHI	WD domain containing protein	EHI_010500	0	0	3	0	0	3	DISCRETE	1124
C4LYU7	C4LYU7_ENTHI	BAR/SH3 domain containing protein	EHI_010600	0	0	2	0	0	3	DISCRETE	957
C4LYW1	C4LYW1_ENTHI	Putative uncharacterized protein	EHI_010740	0	0	1	0	0	3	DISCRETE	1369
C4M017	C4M017_ENTHI	Leucine-rich repeat containing protein	EHI_134680	0	0	1	0	0	3	DISCRETE	1076
C4M0W6	C4M0W6_ENTHI	UDP-glucose:glycoprotein glucosyltransferase, putative	EHI_015280	0	0	2	0	0	3	DISCRETE	478
C4M1W5	C4M1W5_ENTHI	Putative uncharacterized protein	EHI_027790	0	0	1	0	0	3	DISCRETE	803
C4M2H0	C4M2H0_ENTHI	Putative uncharacterized protein	EHI_040410	0	0	2	0	0	3	DISCRETE	1611
C4M518	C4M518_ENTHI	Helicase, putative	EHI_141120	0	0	1	0	0	3	DISCRETE	1235
A9UKI7	A9UKI7_ENTHI	Vacuolar protein sorting protein 35-2	VPS35-2	0	0	1	0	0	2	EQUIVALENT	1600	C4LWG4
B1N4S3	B1N4S3_ENTHI	Putative uncharacterized protein	EHI_154710	0	0	2	0	0	2	EQUIVALENT	997	C4M9P6
B1N5B0	B1N5B0_ENTHI	Protein kinase domain containing protein	EHI_106700	0	0	1	0	0	2	DISCRETE	1307
C4LSG8	C4LSG8_ENTHI	Putative uncharacterized protein	EHI_151250	0	0	2	0	0	2	DISCRETE	890
C4LSV3	C4LSV3_ENTHI	Rap/Ran GTPase-activating protein, putative	EHI_152690	0	0	1	0	0	2	EQUIVALENT	1580	C4M1F7
C4LT00	C4LT00_ENTHI	Putative uncharacterized protein	EHI_148300	0	0	1	0	0	2	DISCRETE	1565
C4LTQ3	C4LTQ3_ENTHI	Putative uncharacterized protein	EHI_050260	0	0	1	0	0	2	DISCRETE	1781
C4LTY5	C4LTY5_ENTHI	Ras guanine nucleotide exchange factor, putative	EHI_067890	0	0	1	0	0	2	DISCRETE	1226
C4LU67	C4LU67_ENTHI	Putative uncharacterized protein	EHI_110130	0	0	2	0	0	2	DISCRETE	455
C4LU71	C4LU71_ENTHI	Ubiquitin carboxyl-terminal hydrolase domain containing protein	EHI_110170	0	0	1	0	0	2	DISCRETE	1646
C4LUC5	C4LUC5_ENTHI	Putative uncharacterized protein	EHI_110780	0	0	1	0	0	2	DISCRETE	1454
C4LUM9	C4LUM9_ENTHI	Rab geranylgeranyltransferase alpha subunit, putative	EHI_023180	0	0	1	0	0	2	EQUIVALENT	1693	Q2PHE3
C4LUU4	C4LUU4_ENTHI	Putative uncharacterized protein	EHI_178800	0	0	1	0	0	2	DISCRETE	1684
C4LV56	C4LV56_ENTHI	Amino acid transporter, putative	EHI_182750	0	0	1	0	0	2	DISCRETE	914
C4LVJ7	C4LVJ7_ENTHI	DNA primase	EHI_103530	0	0	1	0	0	2	DISCRETE	1697
C4LW91	C4LW91_ENTHI	Putative uncharacterized protein	EHI_155400	0	0	1	0	0	2	DISCRETE	1488
C4LX63	C4LX63_ENTHI	Ran-binding protein, putative	EHI_159890	0	0	1	0	0	2	DISCRETE	1748
C4LYE1	C4LYE1_ENTHI	Ankyrin repeat protein, putative	EHI_008050	0	0	1	0	0	2	DISCRETE	1038
C4LYK1	C4LYK1_ENTHI	Rab GTPase activating protein, putative	EHI_094140	0	0	2	0	0	2	DISCRETE	1255
C4LYT4	C4LYT4_ENTHI	Ran binding protein, putative	EHI_010370	0	0	1	0	0	2	DISCRETE	1601
C4LZD0	C4LZD0_ENTHI	Heat shock protein 70, putative	EHI_137670	0	0	1	0	0	2	DISCRETE	1800
C4LZD9	C4LZD9_ENTHI	Leucine rich repeat / protein phosphatase 2C domain containing protein	EHI_137760	0	0	1	0	0	2	DISCRETE	1253
C4LZH2	C4LZH2_ENTHI	Putative uncharacterized protein	EHI_124340	0	0	2	0	0	2	DISCRETE	770
C4LZH5	C4LZH5_ENTHI	Putative uncharacterized protein	EHI_124390	0	0	2	0	0	2	DISCRETE	1744
C4LZS9	C4LZS9_ENTHI	Putative uncharacterized protein	EHI_039080	0	0	1	0	0	2	DISCRETE	1628
C4M071	C4M071_ENTHI	Signal recognition particle protein SRP54, putative	EHI_004750	0	0	2	0	0	3	SUPERSET	677	O15821
C4M090	C4M090_ENTHI	Bystin, putative	EHI_004960	0	0	1	0	0	2	EQUIVALENT	798	S0AY52
C4M1E0	C4M1E0_ENTHI	Putative uncharacterized protein	EHI_170180	0	0	2	0	0	2	DISCRETE	1191
C4M2A0	C4M2A0_ENTHI	Ser/thr protein phosphatase family protein	EHI_136200	0	0	1	0	0	2	DISCRETE	1461
C4M2S6	C4M2S6_ENTHI	Leucine-rich repeat containing protein	EHI_076850	0	0	1	0	0	2	DISCRETE	897
C4M2T0	C4M2T0_ENTHI	Putative uncharacterized protein	EHI_076890	0	0	1	0	0	2	DISCRETE	615
C4M350	C4M350_ENTHI	Putative uncharacterized protein	EHI_085950	0	0	2	0	0	2	DISCRETE	313
C4M3C6	C4M3C6_ENTHI	Helicase, putative	EHI_053080	0	0	1	0	0	2	DISCRETE	1619
C4M3K5	C4M3K5_ENTHI	Chromatin-specific transcription elongation factor, putative	EHI_109860	0	0	1	0	0	2	DISCRETE	1679
C4M3Z1	C4M3Z1_ENTHI	Protein kinase, putative	EHI_185230	0	0	1	0	0	2	DISCRETE	1612
C4M5F2	C4M5F2_ENTHI	Adaptor protein (AP) family protein	EHI_058450	0	0	2	0	0	2	EQUIVALENT	1374	Q1EQ25
C4M7L7	C4M7L7_ENTHI	Putative uncharacterized protein	EHI_200040	0	0	1	0	0	2	DISCRETE	1114
C4M7Z6	C4M7Z6_ENTHI	Protein kinase domain containing protein	EHI_167640	0	0	2	0	0	2	DISCRETE	771
C4M8M2	C4M8M2_ENTHI	ABC transporter, putative	EHI_114390	0	0	1	0	0	2	DISCRETE	548
C4M8R9	C4M8R9_ENTHI	Putative uncharacterized protein	EHI_181570	0	0	1	0	0	2	DISCRETE	408
C4M8X4	C4M8X4_ENTHI	Putative uncharacterized protein	EHI_120630	0	0	2	0	0	2	DISCRETE	1145
C4M9W2	C4M9W2_ENTHI	Kinesin, putative	EHI_113570	0	0	1	0	0	2	DISCRETE	1614
C4MAM8	C4MAM8_ENTHI	Putative uncharacterized protein	EHI_196760	0	0	1	0	0	2	DISCRETE	741
Q1EQ09	Q1EQ09_ENTHI	Syntaxin, putative	EHI_139030	0	0	1	0	0	2	DISCRETE	1487
Q9Y088	Q9Y088_ENTHI	Phospholipid-transporting P-type ATPase, putative	atpase	0	0	1	0	0	2	DISCRETE	1589
S0AVG3	S0AVG3_ENTHI	Uncharacterized protein		0	0	1	0	0	2	DISCRETE	1559
C4M5M6	C4M5M6_ENTHI	Coronin	EHI_122800	0	1	2	0	1	2	EQUIVALENT	823	Q9XYQ0
B1N2J6	B1N2J6_ENTHI	GTP-binding protein, putative	EHI_051090	0	0	1	0	0	1	DISCRETE	959
B1N2R3	B1N2R3_ENTHI	Putative uncharacterized protein	EHI_126300	0	0	1	0	0	1	DISCRETE	1095
B1N2U8	B1N2U8_ENTHI	Putative uncharacterized protein	EHI_159590	0	0	1	0	0	1	DISCRETE	351
B1N2V3	B1N2V3_ENTHI	Putative uncharacterized protein	EHI_159840	0	0	1	0	0	1	DISCRETE	1775
B1N364	B1N364_ENTHI	Putative uncharacterized protein	EHI_194230	0	0	1	0	0	1	DISCRETE	1119
B1N3N2	B1N3N2_ENTHI	Putative uncharacterized protein	EHI_140380	0	0	1	0	0	1	EQUIVALENT	757	C4M0H7
B1N4E3	B1N4E3_ENTHI	Putative uncharacterized protein	EHI_193680	0	0	1	0	0	1	EQUIVALENT	1259	B1N531
B1N4E6	B1N4E6_ENTHI	Putative uncharacterized protein	EHI_034600	0	0	1	0	0	1	EQUIVALENT	1221	B1N547
B1N4I0	B1N4I0_ENTHI	RhoGAP domain containing protein	EHI_055340	0	0	1	0	0	1	DISCRETE	1041
B1N4I2	B1N4I2_ENTHI	Putative uncharacterized protein	EHI_055390	0	0	1	0	0	1	DISCRETE	1796
B1N4R1	B1N4R1_ENTHI	Putative uncharacterized protein	EHI_049180	0	0	1	0	0	1	DISCRETE	907
B1N4R7	B1N4R7_ENTHI	Putative uncharacterized protein	EHI_119740	0	0	1	0	0	1	EQUIVALENT	614	C4MAA3, C4MAP9
B1N5I7	B1N5I7_ENTHI	Putative uncharacterized protein	EHI_198110	0	0	1	0	0	1	DISCRETE	502
B1N5S3	B1N5S3_ENTHI	60S ribosomal protein L34, putative	EHI_131770	0	0	1	0	0	1	DISCRETE	1161
C4LSE0	C4LSE0_ENTHI	Inositol polyphosphate 5-phosphatase, putative	EHI_153490	0	0	1	0	0	1	DISCRETE	1022
C4LSE2	C4LSE2_ENTHI	Rho guanine nucleotide exchange factor, putative	EHI_153510	0	0	1	0	0	1	DISCRETE	420
C4LSG3	C4LSG3_ENTHI	DEAD/DEAH box helicase, putative	EHI_151190	0	0	1	0	0	1	DISCRETE	1281
C4LSJ6	C4LSJ6_ENTHI	Putative uncharacterized protein	EHI_151550	0	0	1	0	0	1	DISCRETE	1568
C4LSS6	C4LSS6_ENTHI	Protein kinase domain containing protein	EHI_152390	0	0	1	0	0	1	DISCRETE	1188
C4LSX7	C4LSX7_ENTHI	Importin alpha, putative	EHI_148070	0	0	1	0	0	1	DISCRETE	1223
C4LSY6	C4LSY6_ENTHI	Cullin, putative	EHI_148160	0	0	1	0	0	1	DISCRETE	150
C4LSZ0	C4LSZ0_ENTHI	Serine/threonine-protein kinase, putative	EHI_148200	0	0	1	0	0	1	DISCRETE	1347
C4LT03	C4LT03_ENTHI	Pumilio family RNA-binding protein	EHI_148330	0	0	1	0	0	1	DISCRETE	1416
C4LT57	C4LT57_ENTHI	Protein kinase, putative	EHI_148900	0	0	1	0	0	1	DISCRETE	1623
C4LT61	C4LT61_ENTHI	Putative uncharacterized protein	EHI_148940	0	0	1	0	0	1	DISCRETE	1657
C4LT64	C4LT64_ENTHI	RhoGAP domain containing protein	EHI_148980	0	0	1	0	0	1	DISCRETE	399
C4LTC1	C4LTC1_ENTHI	Uncharacterized protein	EHI_045060	0	0	1	0	0	1	DISCRETE	1044
C4LTI6	C4LTI6_ENTHI	Protein kinase, putative	EHI_011920	0	0	1	0	0	1	DISCRETE	1311
C4LTL1	C4LTL1_ENTHI	Putative uncharacterized protein	EHI_012180	0	0	1	0	0	1	DISCRETE	568
C4LTP7	C4LTP7_ENTHI	Rho guanine nucleotide exchange factor, putative	EHI_050100	0	0	1	0	0	1	DISCRETE	563
C4LTU9	C4LTU9_ENTHI	Structural maintenance of chromosomes protein	EHI_050790	0	0	1	0	0	1	DISCRETE	862
C4LTX9	C4LTX9_ENTHI	WD domain containing protein	EHI_067830	0	0	1	0	0	1	DISCRETE	1613
C4LTZ0	C4LTZ0_ENTHI	Putative uncharacterized protein	EHI_067940	0	0	1	0	0	1	DISCRETE	263
C4LU09	C4LU09_ENTHI	Tyrosine kinase, putative	EHI_068160	0	0	1	0	0	1	DISCRETE	10
C4LUD9	C4LUD9_ENTHI	LSM domain containing protein	EHI_049370	0	0	1	0	0	1	DISCRETE	1135
C4LUH8	C4LUH8_ENTHI	Bromodomain protein, putative	EHI_049790	0	0	1	0	0	1	DISCRETE	1790
C4LUM5	C4LUM5_ENTHI	Putative uncharacterized protein	EHI_023130	0	0	1	0	0	1	DISCRETE	1532
C4LUS9	C4LUS9_ENTHI	Putative uncharacterized protein	EHI_178650	0	0	1	0	0	1	DISCRETE	1650
C4LUV4	C4LUV4_ENTHI	Ras family protein	EHI_178900	0	0	1	0	0	1	DISCRETE	671
C4LUX1	C4LUX1_ENTHI	Phosphatidylinositol-4,5-bisphosphate 3-kinase catalytic subunit, putative	EHI_091940	0	0	1	0	0	1	DISCRETE	1608
C4LV61	C4LV61_ENTHI	Putative uncharacterized protein	EHI_182810	0	0	1	0	0	1	DISCRETE	848
C4LV77	C4LV77_ENTHI	Dolichyl-diphosphooligosaccharide-protein glycotransferase, putative	EHI_183010	0	0	1	0	0	1	DISCRETE	418
C4LVE7	C4LVE7_ENTHI	Phosphatidylinositol 3-and 4-kinase family	EHI_197310	0	0	1	0	0	1	DISCRETE	1363
C4LVQ2	C4LVQ2_ENTHI	PIWI domain protein	EHI_186850	0	0	1	0	0	1	DISCRETE	1233
C4LVX1	C4LVX1_ENTHI	Protein kinase domain containing protein	EHI_125850	0	0	1	0	0	1	EQUIVALENT	1310	Q8MZU5
C4LW36	C4LW36_ENTHI	Chromodomain-helicase-DNA-binding protein, putative	EHI_141900	0	0	1	0	0	1	DISCRETE	944
C4LW52	C4LW52_ENTHI	Putative uncharacterized protein	EHI_142070	0	0	1	0	0	1	DISCRETE	1419
C4LW54	C4LW54_ENTHI	RNA polymerase subunit Rpb5, putative	EHI_142090	0	0	1	0	0	1	DISCRETE	561
C4LWA4	C4LWA4_ENTHI	Chromosome partition protein, putative	EHI_155530	0	0	1	0	0	1	DISCRETE	1674
C4LWD0	C4LWD0_ENTHI	Protein kinase domain containing protein	EHI_096170	0	0	1	0	0	1	DISCRETE	573
C4LWU5	C4LWU5_ENTHI	Formate/nitrite transporter family protein, putative	EHI_198990	0	0	1	0	0	1	DISCRETE	250
C4LWX3	C4LWX3_ENTHI	Putative uncharacterized protein	EHI_126970	0	0	1	0	0	1	DISCRETE	1691
C4LWX9	C4LWX9_ENTHI	Ras guanine nucleotide exchange factor, putative	EHI_127040	0	0	1	0	0	1	DISCRETE	1162
C4LWZ4	C4LWZ4_ENTHI	Long-chain-fatty-acid--CoA ligase, putative	EHI_127210	0	0	1	0	0	1	DISCRETE	158
C4LX48	C4LX48_ENTHI	Putative uncharacterized protein	EHI_159680	0	0	1	0	0	1	DISCRETE	1210
C4LXC3	C4LXC3_ENTHI	WD domain containing protein	EHI_098410	0	0	1	0	0	1	DISCRETE	1754
C4LXK0	C4LXK0_ENTHI	HAD hydrolase, family IA, variant 3	EHI_073350	0	0	1	0	0	1	DISCRETE	350
C4LXL5	C4LXL5_ENTHI	Putative uncharacterized protein	EHI_073550	0	0	1	0	0	1	DISCRETE	1314
C4LXS4	C4LXS4_ENTHI	Putative uncharacterized protein	EHI_014400	0	0	1	0	0	1	DISCRETE	1718
C4LXS5	C4LXS5_ENTHI	Putative uncharacterized protein	EHI_087320	0	0	1	0	0	1	DISCRETE	1315
C4LXU1	C4LXU1_ENTHI	VHS domain containing protein	EHI_087590	0	0	1	0	0	1	DISCRETE	1773
C4LXW1	C4LXW1_ENTHI	RhoGAP domain containing protein	EHI_087810	0	0	1	0	0	1	DISCRETE	1446
C4LXW5	C4LXW5_ENTHI	RhoGEF domain-containing protein	EHI_087850	0	0	1	0	0	1	DISCRETE	1634
C4LY62	C4LY62_ENTHI	Ras guanine nucleotide exchange factor, putative	EHI_051430	0	0	1	0	0	1	DISCRETE	782
C4LY76	C4LY76_ENTHI	Protein with RhoGEF and ArfGAP domains	EHI_051820	0	0	1	0	0	1	DISCRETE	1553
C4LY79	C4LY79_ENTHI	Putative uncharacterized protein	EHI_051850	0	0	1	0	0	1	DISCRETE	1635
C4LYA1	C4LYA1_ENTHI	Putative uncharacterized protein	EHI_166990	0	0	1	0	0	1	DISCRETE	721
C4LYD5	C4LYD5_ENTHI	Putative uncharacterized protein	EHI_007980	0	0	1	0	0	1	DISCRETE	1285
C4LYG5	C4LYG5_ENTHI	Uncharacterized protein	EHI_093740	0	0	1	0	0	1	DIFFERENTIABLE	257
C4LYG6	C4LYG6_ENTHI	Putative uncharacterized protein	EHI_093750	0	0	1	0	0	1	DISCRETE	1605
C4LYI7	C4LYI7_ENTHI	Pre-mRNA splicing factor, putative	EHI_093960	0	0	1	0	0	1	DISCRETE	1724
C4LYU2	C4LYU2_ENTHI	Protein with DENN and LIM domains	EHI_010550	0	0	1	0	0	1	DISCRETE	911
C4LYV0	C4LYV0_ENTHI	HEAT repeat domain containing protein	EHI_010630	0	0	1	0	0	1	DISCRETE	728
C4LYW0	C4LYW0_ENTHI	Vacuolar sorting protein 26, putative	EHI_010730	0	0	1	0	0	1	DISCRETE	1700
C4LYW7	C4LYW7_ENTHI	Putative uncharacterized protein	EHI_117830	0	0	1	0	0	1	DISCRETE	1240
C4LZ28	C4LZ28_ENTHI	Alpha-1,2-mannosidase, putative	EHI_009520	0	0	1	0	0	1	DISCRETE	1157
C4LZ74	C4LZ74_ENTHI	Putative uncharacterized protein	EHI_104650	0	0	1	0	0	1	DISCRETE	1466
C4LZA3	C4LZA3_ENTHI	WD domain containing protein	EHI_000520	0	0	1	0	0	1	DISCRETE	1521
C4LZC7	C4LZC7_ENTHI	Chromodomain-helicase-DNA-binding protein, putative	EHI_000780	0	0	1	0	0	1	DISCRETE	1467
C4LZF3	C4LZF3_ENTHI	Putative uncharacterized protein	EHI_137920	0	0	1	0	0	1	DISCRETE	779
C4LZF7	C4LZF7_ENTHI	Putative uncharacterized protein	EHI_137960	0	0	1	0	0	1	DISCRETE	95
C4LZJ8	C4LZJ8_ENTHI	Putative uncharacterized protein	EHI_174500	0	0	1	0	0	1	DISCRETE	1643
C4LZR9	C4LZR9_ENTHI	Putative uncharacterized protein	EHI_038980	0	0	1	0	0	1	DISCRETE	1485
C4LZV6	C4LZV6_ENTHI	Putative uncharacterized protein	EHI_194430	0	0	1	0	0	1	DISCRETE	1525
C4LZW6	C4LZW6_ENTHI	Uncharacterized protein	EHI_194550	0	0	1	0	0	1	SUPERSET	381	S0AUT9, S0AVU3, S0AW38, S0AWL4, S0AXU6, S0AYV9
C4LZY5	C4LZY5_ENTHI	Phospholipase, patatin family protein	EHI_065690	0	0	1	0	0	1	DISCRETE	1641
C4M000	C4M000_ENTHI	Putative uncharacterized protein	EHI_065840	0	0	1	0	0	1	DISCRETE	1282
C4M008	C4M008_ENTHI	Putative uncharacterized protein	EHI_134480	0	0	1	0	0	1	DISCRETE	1026
C4M024	C4M024_ENTHI	Protein tyrosine kinase domain-containing protein	EHI_134750	0	0	1	0	0	1	DISCRETE	921
C4M044	C4M044_ENTHI	Putative uncharacterized protein	EHI_021290	0	0	1	0	0	1	DISCRETE	1192
C4M0B1	C4M0B1_ENTHI	Putative uncharacterized protein	EHI_064320	0	0	1	0	0	1	DISCRETE	264
C4M0D9	C4M0D9_ENTHI	Putative uncharacterized protein	EHI_006540	0	0	1	0	0	1	DISCRETE	1582
C4M0G4	C4M0G4_ENTHI	Putative uncharacterized protein	EHI_006910	0	0	1	0	0	1	DISCRETE	465
C4M0G5	C4M0G5_ENTHI	Papain family cysteine protease domain containing protein	EHI_006920	0	0	1	0	0	1	DISCRETE	1080
C4M0G8	C4M0G8_ENTHI	Putative uncharacterized protein	EHI_006950	0	0	1	0	0	1	DISCRETE	839
C4M0M2	C4M0M2_ENTHI	Ribose-phosphate pyrophosphokinase, putative	EHI_008460	0	0	1	0	0	1	DISCRETE	1372
C4M0N2	C4M0N2_ENTHI	Ubiquitin carboxyl-terminal hydrolase family protein	EHI_008680	0	0	1	0	0	1	DISCRETE	1028
C4M0T3	C4M0T3_ENTHI	Putative uncharacterized protein	EHI_100440	0	0	1	0	0	1	DISCRETE	1533
C4M118	C4M118_ENTHI	Protein kinase, putative	EHI_105130	0	0	1	0	0	1	DISCRETE	1585
C4M120	C4M120_ENTHI	Putative uncharacterized protein	EHI_105150	0	0	1	0	0	1	DISCRETE	1496
C4M191	C4M191_ENTHI	Uncharacterized protein	EHI_188170	0	0	1	0	0	1	EQUIVALENT	381	S0AVS7
C4M1I8	C4M1I8_ENTHI	Putative uncharacterized protein	EHI_001080	0	0	1	0	0	1	DISCRETE	1757
C4M1L2	C4M1L2_ENTHI	Putative uncharacterized protein	EHI_085020	0	0	1	0	0	1	DISCRETE	884
C4M1N5	C4M1N5_ENTHI	Cysteine protease, putative	EHI_062480	0	0	1	0	0	1	EQUIVALENT	1019	Q8I8D1
C4M1P3	C4M1P3_ENTHI	Putative uncharacterized protein	EHI_062670	0	0	1	0	0	1	DISCRETE	960
C4M1V3	C4M1V3_ENTHI	Putative uncharacterized protein	EHI_027670	0	0	1	0	0	1	DISCRETE	1668
C4M1V7	C4M1V7_ENTHI	Calcium-transporting P-type ATPase, putative	EHI_027710	0	0	1	0	0	1	DISCRETE	903
C4M1X6	C4M1X6_ENTHI	Putative uncharacterized protein	EHI_164830	0	0	1	0	0	1	DISCRETE	810
C4M1Y4	C4M1Y4_ENTHI	Serine/threonine-protein kinase, putative	EHI_164910	0	0	1	0	0	1	DISCRETE	1663
C4M224	C4M224_ENTHI	Villidin, putative	EHI_150430	0	0	1	0	0	1	DISCRETE	321
C4M275	C4M275_ENTHI	Protein tyrosine kinase domain-containing protein	EHI_180150	0	0	1	0	0	1	DISCRETE	668
C4M276	C4M276_ENTHI	FK506-binding protein, putative	EHI_180160	0	0	1	0	0	1	DISCRETE	1428
C4M283	C4M283_ENTHI	Putative uncharacterized protein	EHI_180330	0	0	1	0	0	1	DISCRETE	108
C4M284	C4M284_ENTHI	Putative uncharacterized protein	EHI_180340	0	0	1	0	0	1	DISCRETE	1701
C4M2L7	C4M2L7_ENTHI	Putative uncharacterized protein	EHI_079960	0	0	1	0	0	1	DISCRETE	565
C4M2Q4	C4M2Q4_ENTHI	Inositol polyphosphate 5-phosphatase, putative	EHI_160860	0	0	1	0	0	1	DISCRETE	1123
C4M318	C4M318_ENTHI	Putative uncharacterized protein	EHI_025310	0	0	1	0	0	1	DISCRETE	1481
C4M329	C4M329_ENTHI	Long-chain-fatty-acid--CoA ligase, putative	EHI_025420	0	0	1	0	0	1	DISCRETE	326
C4M369	C4M369_ENTHI	Ras guanine nucleotide exchange factor, putative	EHI_086140	0	0	1	0	0	1	DISCRETE	1400
C4M383	C4M383_ENTHI	Putative uncharacterized protein	EHI_106080	0	0	1	0	0	1	DISCRETE	972
C4M3C8	C4M3C8_ENTHI	Putative uncharacterized protein	EHI_053100	0	0	1	0	0	1	DISCRETE	1798
C4M3H9	C4M3H9_ENTHI	Putative uncharacterized protein	EHI_138370	0	0	1	0	0	1	DISCRETE	1448
C4M3I5	C4M3I5_ENTHI	Putative uncharacterized protein	EHI_138430	0	0	1	0	0	1	DISCRETE	750
C4M3I8	C4M3I8_ENTHI	Papain family cysteine protease domain containing protein	EHI_138460	0	0	1	0	0	1	DISCRETE	1807
C4M3J4	C4M3J4_ENTHI	Putative uncharacterized protein	EHI_138520	0	0	1	0	0	1	DISCRETE	780
C4M3K4	C4M3K4_ENTHI	Putative uncharacterized protein	EHI_109850	0	0	1	0	0	1	DISCRETE	932
C4M3K7	C4M3K7_ENTHI	Putative uncharacterized protein	EHI_109880	0	0	1	0	0	1	DISCRETE	1201
C4M3Q2	C4M3Q2_ENTHI	Putative uncharacterized protein	EHI_145970	0	0	1	0	0	1	DISCRETE	1475
C4M3Q9	C4M3Q9_ENTHI	Putative uncharacterized protein	EHI_146160	0	0	1	0	0	1	EQUIVALENT	1352	C4M5W0
C4M3U1	C4M3U1_ENTHI	Putative uncharacterized protein	EHI_163600	0	0	1	0	0	1	DISCRETE	1239
C4M3W5	C4M3W5_ENTHI	Myotubularin, putative	EHI_016430	0	0	1	0	0	1	DISCRETE	1208
C4M3W9	C4M3W9_ENTHI	Putative uncharacterized protein	EHI_016470	0	0	1	0	0	1	DISCRETE	928
C4M3Z5	C4M3Z5_ENTHI	Dedicator of cytokinesis domain containing protein	EHI_185270	0	0	1	0	0	1	DISCRETE	1292
C4M429	C4M429_ENTHI	Putative uncharacterized protein	EHI_114220	0	0	1	0	0	1	DISCRETE	899
C4M469	C4M469_ENTHI	Putative uncharacterized protein	EHI_140200	0	0	1	0	0	1	DISCRETE	1368
C4M480	C4M480_ENTHI	Protein kinase, putative	EHI_140320	0	0	1	0	0	1	DISCRETE	843
C4M4D0	C4M4D0_ENTHI	Putative uncharacterized protein	EHI_156300	0	0	1	0	0	1	DISCRETE	1677
C4M4E9	C4M4E9_ENTHI	Rho guanine nucleotide exchange factor, putative	EHI_078740	0	0	1	0	0	1	DISCRETE	755
C4M4M5	C4M4M5_ENTHI	Putative uncharacterized protein	EHI_189410	0	0	1	0	0	1	DIFFERENTIABLE	831
C4M4S0	C4M4S0_ENTHI	Putative uncharacterized protein	EHI_095070	0	0	1	0	0	1	DISCRETE	785
C4M4V1	C4M4V1_ENTHI	Haloacid dehalogenase-like hydrolase domain-containing protein	EHI_193490	0	0	1	0	0	1	DISCRETE	1717
C4M4X2	C4M4X2_ENTHI	FHA domain protein, putative	EHI_029080	0	0	1	0	0	1	DISCRETE	509
C4M551	C4M551_ENTHI	Putative uncharacterized protein	EHI_178130	0	0	1	0	0	1	DISCRETE	501
C4M555	C4M555_ENTHI	Leucine rich repeat / protein phosphatase 2C domain containing protein	EHI_178020	0	0	1	0	0	1	DISCRETE	797
C4M5D0	C4M5D0_ENTHI	Putative uncharacterized protein	EHI_121840	0	0	1	0	0	1	DISCRETE	1716
C4M5H5	C4M5H5_ENTHI	Hsp70 family protein	EHI_111080	0	0	1	0	0	1	EQUIVALENT	1799	Q8I8X7
C4M5T8	C4M5T8_ENTHI	Leucine rich repeat protein, BspA family	EHI_082060	0	0	1	0	0	1	DISCRETE	445
C4M5W3	C4M5W3_ENTHI	Putative uncharacterized protein	EHI_026430	0	0	1	0	0	1	DISCRETE	834
C4M5W5	C4M5W5_ENTHI	Putative uncharacterized protein	EHI_026450	0	0	1	0	0	1	DISCRETE	1165
C4M606	C4M606_ENTHI	Putative uncharacterized protein	EHI_072010	0	0	1	0	0	1	DISCRETE	1750
C4M610	C4M610_ENTHI	Viral A-type inclusion protein repeat, putative	EHI_072050	0	0	1	0	0	1	DISCRETE	1547
C4M612	C4M612_ENTHI	Leucine rich repeat protein, BspA family	EHI_072070	0	0	1	0	0	1	DISCRETE	1670
C4M622	C4M622_ENTHI	Diaphanous protein, putative	EHI_125300	0	0	1	0	0	1	DIFFERENTIABLE	269
C4M626	C4M626_ENTHI	DNA-directed RNA polymerase	EHI_125350	0	0	1	0	0	1	DISCRETE	1552
C4M631	C4M631_ENTHI	Putative uncharacterized protein	EHI_179800	0	0	1	0	0	1	DISCRETE	1433
C4M643	C4M643_ENTHI	Putative uncharacterized protein	EHI_179920	0	0	1	0	0	1	DISCRETE	1159
C4M650	C4M650_ENTHI	Putative uncharacterized protein	EHI_179990	0	0	1	0	0	1	DISCRETE	1073
C4M657	C4M657_ENTHI	Leucine rich repeat protein	EHI_042890	0	0	1	0	0	1	DISCRETE	1557
C4M692	C4M692_ENTHI	Cytosolic regulator pianissimo, putative	EHI_081760	0	0	1	0	0	1	DISCRETE	1405
C4M6B5	C4M6B5_ENTHI	Putative uncharacterized protein	EHI_099220	0	0	1	0	0	1	DISCRETE	1286
C4M6D8	C4M6D8_ENTHI	Putative uncharacterized protein	EHI_142910	0	0	1	0	0	1	DISCRETE	1591
C4M6F8	C4M6F8_ENTHI	Putative uncharacterized protein	EHI_099780	0	0	1	0	0	1	DISCRETE	1575
C4M6H8	C4M6H8_ENTHI	Mucin-2, putative	EHI_173410	0	1	1	0	1	1	DISCRETE	1150
C4M6I4	C4M6I4_ENTHI	Putative uncharacterized protein	EHI_173500	0	0	1	0	0	1	DISCRETE	1702
C4M6Q2	C4M6Q2_ENTHI	Putative uncharacterized protein	EHI_201230	0	0	1	0	0	1	DISCRETE	1070
C4M6Q8	C4M6Q8_ENTHI	HEAT repeat domain containing protein	EHI_201290	0	0	1	0	0	1	DISCRETE	1238
C4M6T0	C4M6T0_ENTHI	Protein kinase, putative	EHI_184540	0	0	1	0	0	1	DISCRETE	1273
C4M6T2	RTCB2_ENTHI	tRNA-splicing ligase RtcB homolog 2	EHI_184560	0	0	1	0	0	1	DISCRETE	1621
C4M6T3	C4M6T3_ENTHI	Lipase, putative	EHI_054190	0	0	1	0	0	1	DISCRETE	196
C4M6W9	C4M6W9_ENTHI	Putative uncharacterized protein	EHI_139440	0	0	1	0	0	1	DISCRETE	1734
C4M6Y0	C4M6Y0_ENTHI	Cleavage and polyadenylation specificity factor 100 kDa subunit, putative	EHI_033130	0	0	1	0	0	1	DISCRETE	1783
C4M700	C4M700_ENTHI	Protein kinase, putative	EHI_057680	0	0	1	0	0	1	DISCRETE	1640
C4M731	C4M731_ENTHI	Putative uncharacterized protein	EHI_183520	0	0	1	0	0	1	DISCRETE	1009
C4M777	C4M777_ENTHI	Structural maintenance of chromosomes protein	EHI_199700	0	0	1	0	0	1	DISCRETE	1270
C4M7A4	C4M7A4_ENTHI	Putative uncharacterized protein	EHI_046680	0	0	1	0	0	1	DISCRETE	864
C4M7D1	C4M7D1_ENTHI	Protein kinase domain containing protein	EHI_011180	0	0	1	0	0	1	DISCRETE	1615
C4M7E0	C4M7E0_ENTHI	Putative uncharacterized protein	EHI_109000	0	0	1	0	0	1	DISCRETE	1349
C4M7E4	C4M7E4_ENTHI	Putative uncharacterized protein	EHI_166370	0	0	1	0	0	1	DISCRETE	1048
C4M7I9	C4M7I9_ENTHI	WD domain containing protein	EHI_023870	0	0	1	0	0	1	DISCRETE	1550
C4M7P0	C4M7P0_ENTHI	Chaperone protein dnaK, putative	EHI_037230	0	0	1	0	0	1	DISCRETE	1602
C4M7V2	C4M7V2_ENTHI	Putative uncharacterized protein	EHI_020360	0	0	1	0	0	1	DISCRETE	1486
C4M808	C4M808_ENTHI	Putative uncharacterized protein	EHI_143620	0	1	1	0	1	1	DISCRETE	1214
C4M8H7	C4M8H7_ENTHI	Putative uncharacterized protein	EHI_120270	0	0	1	0	0	1	DISCRETE	1427
C4M8K3	C4M8K3_ENTHI	Actin, putative	EHI_197810	0	0	1	0	0	1	DISCRETE	696
C4M8P6	C4M8P6_ENTHI	Helicase, putative	EHI_053600	0	0	1	0	0	1	DISCRETE	1662
C4M8S8	C4M8S8_ENTHI	Putative uncharacterized protein	EHI_146970	0	0	1	0	0	1	DISCRETE	1660
C4M8U6	C4M8U6_ENTHI	Uncharacterized protein	EHI_169650	0	0	1	0	0	1	DISCRETE	1597
C4M8U7	C4M8U7_ENTHI	Lipid phosphate phosphatase, putative	EHI_169660	0	0	1	0	0	1	DISCRETE	1692
C4M8Y7	C4M8Y7_ENTHI	Short chain dehydrogenase family protein	EHI_086500	0	0	1	0	0	1	EQUIVALENT	543	C4MAX1
C4M928	C4M928_ENTHI	Putative uncharacterized protein	EHI_121510	0	0	1	0	0	1	DISCRETE	1151
C4M954	C4M954_ENTHI	Rap/Ran GTPase activating protein, putative	EHI_139960	0	0	1	0	0	1	DISCRETE	1384
C4M9L4	C4M9L4_ENTHI	Putative uncharacterized protein	EHI_022250	0	0	1	0	0	1	DISCRETE	1313
C4M9L5	C4M9L5_ENTHI	Putative uncharacterized protein	EHI_022260	0	0	1	0	0	1	DISCRETE	1537
C4M9P9	C4M9P9_ENTHI	Putative uncharacterized protein	EHI_095460	0	0	1	0	0	1	DISCRETE	1476
C4M9Q4	C4M9Q4_ENTHI	Putative uncharacterized protein	EHI_055410	0	0	1	0	0	1	DISCRETE	1524
C4M9T0	C4M9T0_ENTHI	Serine/threonine-protein phosphatase	EHI_056650	0	0	1	0	0	1	DISCRETE	1595
C4M9U4	C4M9U4_ENTHI	Sec1 family domain containing protein	EHI_108480	0	0	1	0	0	1	DISCRETE	1202
C4M9W4	C4M9W4_ENTHI	DNA repair/transcription protein Mms19, putative	EHI_129310	0	0	1	0	0	1	DISCRETE	746
C4MA57	C4MA57_ENTHI	Putative uncharacterized protein	EHI_061870	0	0	1	0	0	1	DISCRETE	1707
C4MA95	C4MA95_ENTHI	Heat shock protein 70, putative	EHI_198320	0	0	1	0	0	1	SUPERSET	197	Q9GYV8
C4MAG5	C4MAG5_ENTHI	Putative uncharacterized protein	EHI_154700	0	0	1	0	0	1	DISCRETE	1269
C4MAH2	C4MAH2_ENTHI	Putative uncharacterized protein	EHI_171770	0	0	1	0	0	1	DISCRETE	654
C4MAL5	C4MAL5_ENTHI	Putative uncharacterized protein	EHI_123250	0	0	1	0	0	1	DISCRETE	766
C4MAP7	C4MAP7_ENTHI	Putative uncharacterized protein	EHI_157130	0	0	1	0	0	1	DISCRETE	1354
C4MAQ1	C4MAQ1_ENTHI	Putative uncharacterized protein	EHI_172010	0	0	1	0	0	1	DISCRETE	577
C4MAV0	C4MAV0_ENTHI	Putative uncharacterized protein	EHI_020480	0	0	1	0	0	1	DISCRETE	1740
C4MAY5	C4MAY5_ENTHI	Serine/threonine-protein phosphatase	EHI_167510	0	0	1	0	0	1	DISCRETE	1806
C4MB19	C4MB19_ENTHI	Long-chain-fatty-acid--CoA ligase, putative	EHI_025090	0	0	1	0	0	1	DISCRETE	14
C4MBA2	C4MBA2_ENTHI	Putative uncharacterized protein	EHI_031640	0	0	1	0	0	1	DISCRETE	772
C4MBC2	C4MBC2_ENTHI	Putative uncharacterized protein	EHI_011060	0	0	1	0	0	1	DISCRETE	533
C4MBF3	C4MBF3_ENTHI	Putative uncharacterized protein	EHI_165790	0	0	1	0	0	1	DISCRETE	542
Q1EQ44	Q1EQ44_ENTHI	EhSec24E	EHI_035520	0	0	1	0	0	1	DISCRETE	851
Q5NT06	Q5NT06_ENTHI	Small GTPase EhRabX10	EhRabX10	0	0	1	0	0	1	DISCRETE	950
Q6RCM0	Q6RCM0_ENTHI	DNA topoisomerase 2	EHI_120640	0	0	1	0	0	1	DISCRETE	988
Q70S43	Q70S43_ENTHI	Chloride channel protein 2, putative	clcA	0	0	1	0	0	1	DISCRETE	1736
Q76IN4	Q76IN4_ENTHI	Reverse transcriptase	rt	0	0	1	0	0	1	DISCRETE	1125
C4LUR0	C4LUR0_ENTHI	Putative uncharacterized protein	EHI_178440	0	0	1	0	0	1	DISCRETE	1586
C4LXD1	C4LXD1_ENTHI	Putative uncharacterized protein	EHI_098510	0	3	1	0	3	1	DIFFERENTIABLE	110
S0AVU5	S0AVU5_ENTHI	Uncharacterized protein		0	0	1	0	0	1	DIFFERENTIABLE	1088
C4LZ15	C4LZ15_ENTHI	3-ketoacyl-CoA synthase	EHI_009370	0	0	1	0	0	1	DIFFERENTIABLE	106
B1N330	B1N330_ENTHI	Serine-threonine-isoleucine rich protein, putative	EHI_004340	0	6	0	0	11	0	DIFFERENTIABLE	827
B1N443	B1N443_ENTHI	Putative uncharacterized protein	EHI_200010	0	1	0	0	1	0	DISCRETE	794
C4LSL0	C4LSL0_ENTHI	Putative uncharacterized protein	EHI_151690	0	1	0	0	1	0	DISCRETE	840
C4LSL1	C4LSL1_ENTHI	RhoGAP domain containing protein	EHI_151700	0	1	0	0	1	0	DISCRETE	1659
C4LT38	C4LT38_ENTHI	Putative uncharacterized protein	EHI_148680	0	1	0	0	1	0	DISCRETE	1518
C4LT45	C4LT45_ENTHI	Putative uncharacterized protein	EHI_148770	0	1	0	0	1	0	DISCRETE	1760
C4LT65	C4LT65_ENTHI	Heat shock protein 70, putative	EHI_148990	0	1	0	0	4	0	DISCRETE	349
C4LTM6	C4LTM6_ENTHI	Serine-threonine-isoleucine rich protein, putative	EHI_012330	0	8	0	0	15	0	EQUIVALENT	827	C4MAX8
C4LTV0	C4LTV0_ENTHI	Putative uncharacterized protein	EHI_050800	0	1	0	0	2	0	EQUIVALENT	1410	S0AZA7
C4LTV9	C4LTV9_ENTHI	Uncharacterized protein	EHI_050890	0	3	0	0	5	0	DIFFERENTIABLE	807
C4LU27	C4LU27_ENTHI	Putative uncharacterized protein	EHI_068340	0	1	0	0	1	0	DISCRETE	1541
C4LU31	C4LU31_ENTHI	Thioredoxin, putative	EHI_068390	0	4	0	0	8	0	EQUIVALENT	494	C4LUL8
C4LUN4	C4LUN4_ENTHI	Histone H4	EHI_023230	0	0	1	0	0	3	EQUIVALENT	943	P40287
C4LUZ1	C4LUZ1_ENTHI	Tyrosine kinase, putative	EHI_092260	0	1	0	0	1	0	DISCRETE	1116
C4LV34	C4LV34_ENTHI	Putative uncharacterized protein	EHI_182530	0	2	0	0	5	0	DISCRETE	752
C4LWY9	C4LWY9_ENTHI	Ribonuclease, putative	EHI_127160	0	1	0	0	1	0	DISCRETE	927
C4LXH9	C4LXH9_ENTHI	Putative uncharacterized protein	EHI_131110	0	1	0	0	1	0	DISCRETE	1204
C4LXQ1	C4LXQ1_ENTHI	RNA recognition motif domain containing protein	EHI_014120	0	1	0	0	1	0	DISCRETE	1160
C4LY20	C4LY20_ENTHI	Putative uncharacterized protein	EHI_177670	0	1	0	0	1	0	DISCRETE	1747
C4LYG2	C4LYG2_ENTHI	CXXC-rich protein	EHI_093710	0	1	0	0	1	0	DISCRETE	1632
C4LYV5	C4LYV5_ENTHI	Sand family protein	EHI_010680	0	1	0	0	1	0	DISCRETE	1417
C4LYV8	C4LYV8_ENTHI	Putative uncharacterized protein	EHI_010710	0	1	0	0	2	0	DISCRETE	1142
C4LZ23	C4LZ23_ENTHI	Phospholipid-transporting P-type ATPase, putative	EHI_009460	0	1	0	0	1	0	DISCRETE	1003
C4LZ68	C4LZ68_ENTHI	Apyrase, putative	EHI_104590	0	1	0	0	1	0	DISCRETE	1206
C4M031	C4M031_ENTHI	Putative uncharacterized protein	EHI_134820	0	1	0	0	3	0	DISCRETE	626
C4M038	C4M038_ENTHI	Rho guanine nucleotide exchange factor, putative	EHI_021230	0	1	0	0	1	0	DISCRETE	971
C4M0E6	C4M0E6_ENTHI	Putative uncharacterized protein	EHI_006730	0	1	0	0	2	0	DISCRETE	1212
C4M0Z5	C4M0Z5_ENTHI	Uncharacterized protein	EHI_135090	0	1	0	0	1	0	DISCRETE	981
C4M1H6	C4M1H6_ENTHI	Beta-amylase, putative	EHI_192590	0	2	0	0	2	0	DIFFERENTIABLE	630
C4M1K0	C4M1K0_ENTHI	Lecithin:cholesterol acyltransferase domain-containing protein	EHI_084690	0	1	0	0	1	0	DISCRETE	1627
C4M1L6	C4M1L6_ENTHI	Putative uncharacterized protein	EHI_085060	0	1	0	0	1	0	DISCRETE	410
C4M1U3	C4M1U3_ENTHI	Thioredoxin, putative	EHI_027550	0	1	0	0	1	0	DISCRETE	282
C4M219	C4M219_ENTHI	Putative uncharacterized protein	EHI_150380	0	1	0	0	1	0	DISCRETE	1671
C4M2H5	C4M2H5_ENTHI	Cysteine protease inhibitor 2 (EhICP2)	EHI_040460	0	1	0	0	2	0	SUPERSET	919	Q4GZL2
C4M2I6	C4M2I6_ENTHI	Putative uncharacterized protein	EHI_054670	0	1	0	0	1	0	DISCRETE	1500
C4M3G6	C4M3G6_ENTHI	Putative uncharacterized protein	EHI_017610	0	1	0	0	1	0	DISCRETE	702
C4M3L8	C4M3L8_ENTHI	Putative uncharacterized protein	EHI_110000	0	2	0	0	3	0	DISCRETE	634
C4M3P0	C4M3P0_ENTHI	Putative uncharacterized protein	EHI_140680	0	1	0	0	1	0	DISCRETE	451
C4M4U5	C4M4U5_ENTHI	Putative uncharacterized protein	EHI_193410	0	1	0	0	1	0	DISCRETE	866
C4M512	C4M512_ENTHI	Acid phosphatase, putative	EHI_141060	0	2	0	0	2	0	DISCRETE	1648
C4M546	C4M546_ENTHI	Putative uncharacterized protein	EHI_078200	0	1	0	0	1	0	DISCRETE	1431
C4M5G0	C4M5G0_ENTHI	Zinc finger domain containing protein	EHI_058540	0	1	0	0	1	0	EQUIVALENT	1099	C4M8G3
C4M5N0	C4M5N0_ENTHI	Putative uncharacterized protein	EHI_122720	0	1	0	0	1	0	DISCRETE	1714
C4M611	C4M611_ENTHI	Putative uncharacterized protein	EHI_072060	0	1	0	0	1	0	DISCRETE	1542
C4M6I6	C4M6I6_ENTHI	EF-hand calcium-binding domain containing protein	EHI_173470	0	1	0	0	1	0	DISCRETE	1148
C4M784	C4M784_ENTHI	Putative uncharacterized protein	EHI_044370	0	10	0	0	18	0	DISCRETE	56
C4M8U1	C4M8U1_ENTHI	Putative uncharacterized protein	EHI_143830	0	1	0	0	1	0	DISCRETE	1733
C4M904	C4M904_ENTHI	Putative uncharacterized protein	EHI_147870	0	1	0	0	1	0	DISCRETE	581
C4M916	C4M916_ENTHI	Copine, putative	EHI_192760	0	2	0	0	4	0	DISCRETE	849
C4M9K5	C4M9K5_ENTHI	ARF GTPase activating protein, putative	EHI_189140	0	2	0	0	2	0	DISCRETE	245
C4MA84	C4MA84_ENTHI	Uncharacterized protein	EHI_067260	0	1	0	0	1	0	DISCRETE	411
C4MAD2	C4MAD2_ENTHI	Putative uncharacterized protein	EHI_041070	0	1	0	0	1	0	DISCRETE	1729
C4MAR3	C4MAR3_ENTHI	Putative uncharacterized protein	EHI_070130	0	1	0	0	1	0	DISCRETE	1260
C4MBD5	C4MBD5_ENTHI	Putative uncharacterized protein	EHI_149530	0	1	0	0	1	0	DISCRETE	1077
C4MBF5	C4MBF5_ENTHI	Putative uncharacterized protein	EHI_161640	0	1	1	0	3	1	DISCRETE	1335
Q1EQ05	Q1EQ05_ENTHI	EhSyntaxin 16	EHI_164320	0	1	0	0	1	0	DIFFERENTIABLE	1113
C4LT06	C4LT06_ENTHI	Putative uncharacterized protein	EHI_148360	0	1	0	0	1	0	DISCRETE	1370
C4LX23	C4LX23_ENTHI	RhoGAP domain containing protein	EHI_159300	0	2	0	0	4	0	DISCRETE	987
C4M083	C4M083_ENTHI	Putative uncharacterized protein	EHI_004880	0	1	0	0	1	0	DISCRETE	1244
C4M2K0	C4M2K0_ENTHI	Putative uncharacterized protein	EHI_054810	0	1	0	0	1	0	DISCRETE	1491
C4M588	C4M588_ENTHI	Ras family GTPase	EHI_154240	0	1	0	0	1	0	DISCRETE	1342
C4M6M0	C4M6M0_ENTHI	Putative uncharacterized protein	EHI_147440	0	1	0	0	4	0	DISCRETE	1224
C4M8M0	C4M8M0_ENTHI	Rap/Ran GTPase-activating protein, putative	EHI_090440	0	1	0	0	1	0	DISCRETE	1771
C4M9J5	C4M9J5_ENTHI	Putative uncharacterized protein	EHI_107790	0	1	0	0	1	0	DISCRETE	1503
Q1EPZ7	Q1EPZ7_ENTHI	EhSyntaxin G	EHI_068480	0	1	0	0	2	0	DISCRETE	817
C4LUQ2	C4LUQ2_ENTHI	Glucosidase, putative	EHI_023430	0	3	0	0	6	0	DISCRETE	1163
C4M6J3	C4M6J3_ENTHI	Grainin, putative	EHI_060380	0	1	0	0	2	0	DISCRETE	174
C4LTT0	C4LTT0_ENTHI	Cysteine proteinase, putative	EHI_050570	0	3	0	0	6	0	EQUIVALENT	352	Q27643, S0AYX0, S0AZC0

## Sheet: Total peptides of proteins
Proteins	Peptides
B1N4F4	ADDMDLFGEMTPEEIEAEKKRK
	AEPVGQSQIVYDIKPWGEDTNLDEMEAAVR
	AISREGLEWKGSER
	EGLEWKGSER
	EGLEWKGSERKDVAYGIK
	KAEPVGQSQIVYDIKPWGEDTNLDEMEAAVR
	KLTIICNVLDSVDTESVQEEIEGLEDYVQSVDIVSFNKL
C4M5A1	GFSQLLKEEADSVR
	IGVPSDSVPNFYEALR
	NSDFIYEVVNALVTPLELYSTVVSK
	QTPSTINNLLYTTAPVDLFGIVKEQIEIAK
	SGYNIILQDYKDCPVEIVR
	TSKNSDFIYEVVNALVTPLELYSTVVSK
C4M5A0	AASDATVASTEWDDQKKN
	DAPVIAGEEK
	ELDAKKDAPVIAGEEK
	ESGYINVPTIAFCNSDNSLK
	FMKYTGCTAVAGR
	FTPGSFTNQIQK
	FTPGSFTNQIQKK
	GNNNECIFNLMK
	GNNNECIFNLMKTWEKLSLAAR
	KAASDATVASTEWDDQKKN
	LIIVSDPSVDHQALR
	LIIVSDPSVDHQALRE
	LIIVSDPSVDHQALRESGYINVPTIAFCNSDNSLK
	NVDIAIPCNNR
	TNFPDILKPSAEDIK
	TNFPDILKPSAEDIKMMVACR
	VAKVEDKKAASDATVASTEWDDQKKN
	VEDKKAASDATVASTEWDDQKKN
	VHIGATNLNFAMEEYVYER
	VHIGATNLNFAMEEYVYERGNNNECIFNLMK
	VIAGISNETPSDVVAVAGR
	VIAGISNETPSDVVAVAGRE
	VIAGISNETPSDVVAVAGREMAHR
	YTGCTAVAGRF
C4LTA0	ENISSEAMEAAR
	IIADGCYFK
	ISINKNMLK
	LFDIGNR
	MLSCAGADRLQTGMR
	SAPCDDFPCCVHIVGLERENISSEAMEAAR
	VGQVLISGR
	VKVGQVLISGR
C4LTA2	MKTGNTINYNFK
	TGNTINYNFK
	TGNTINYNFKR
ANT3_HUMAN	NDNDNIFLSPLSISTAFAMTK
C4LXA3	SRPEDLVTEVFGVVTK
B1N4G2	IGNGISAISKNPNVLKK
	SCDVELIR
	SCDVELIRNIGR
	VISQEKQVQLTEVNFEVETVGNNAK
B1N4G9	ITSVCKDGEIFGR
C4LXA6	IALVVDNLQQLEQLEK
	TQVVPGSITVLGIGPAPVSVIDQITGK
C4LXA4	EVLNENEKEIVEMINELANALNK
	ILLEEEEGEAPTPK
	ILLEEEEGEAPTPKEEK
	ILLEEEEGEAPTPKEEKKEK
	MENIISTTNTIQGK
	TITILNAQPPLKTESK
B1N4I1	TPSTDVSFDVPLLR
	TVTTKTPSTDVSFDVPLLR
B1N4I3	AAKEQAESVGAEFCTVSVDEDAENKFGYANAASQR
	AQCMDALSSQNNLAGYR
	AQHVVASLAEELIK
	ASDFTIKLEEPIVR
	ASDFTIKLEEPIVRQ
	CVIEASNKFGR
	CVIEASNKFGRL
	EANTIQTPELAK
	EQAESVGAEFCTVSVDEDAENKFGYANAASQR
	FGYANAASQR
	GINVISMDCVPR
	GYGIYVESGAGLLSSCTDEDYRSVGCR
	IAETTEELYEK
	IAETTEELYEKSNIICK
	IGSVIVDLAAANGGNCEVTR
	ITIIGQTDYTVK
	KASDFTIKLEEPIVR
	KSPILITQDMVDSMK
	KVENINTLSTEEENKK
	LIDAEYALFR
	LIDAEYALFRQ
	LIDAEYALFRQLLPETDIVITTANVPGK
	LIDAEYALFRQLLPETDIVITTANVPGKK
	LLDLSVQK
	LLDLSVQKGINVISMDCVPR
	LLMEAHNIAIVPGYGMAVAK
	LLMGQVTAAGK
	LMGDIVLGNGDISVSEK
	LNQGYAAVDNPLFFYSNTR
	LPGHMNVLLAEANVPYK
	LSKAQCMDALSSQNNLAGYR
	MRQGQTLISFFYPAK
	MSPQASQLYSQNIFNFLNLICK
	MSPQASQLYSQNIFNFLNLICKK
	MVAMVPSVCK
	MWPAPQIQVVSQNTPAK
	NQEDEGPKEANTIQTPELAK
	QGQTLISFFYPAK
	QGQTLISFFYPAKNSK
	QLLPETDIVITTANVPGK
	QLLPETDIVITTANVPGKK
	SFMSVIFGGFGATPSK
	SGETYLYDNR
	SGETYLYDNRITIIGQTDYTVK
	SLNQGYAAVDNPLFFYSNTR
	SPILITQDMVDSMK
	SRGYGIYVESGAGLLSSCTDEDYRSVGCR
	TSLLTGQQETIPMKIDPENLFIGIPK
	TSLLTGQQETIPMKIDPENLFIGIPKENVPEK
	VENINTLSTEEENKK
	VNPPSEEEINKMR
gnl|K1C9_HUMAN	AALEKSLEDTKNR
	DIENQYETQITQIEHEVSSSGQEVQSSAK
	EIETYHNLLEGGQEDFESSGAGK
	GGGGSFGYSYGGGSGGGFSASSLGGGFGGGSR
	GGSGGSHGGGSGFGGESGGSYGGGEEASGSGGGYGGGSGK
	HGVQELEIELQSQLSK
	HGVQELEIELQSQLSKK
	IKFEMEQNLR
	LASYLDKVQALEEANNDLENK
	LASYLDKVQALEEANNDLENKIQDWYDK
	MRLEKEIETYHNLLEGGQEDFESSGAGK
	MTLDDFR
	NRKDIENQYETQITQIEHEVSSSGQEVQSSAK
	NYSPYYNTIDDLKDQIVDLTVGNNK
	QEDFESSGAGKIGLGGR
	QGVDADINGLR
	TLNDMRQEYEQLIAK
	YCGQLQMIQEQISNLEAQITDVR
C4M9D1	ATTPFLLNYLNTHTNSQTVR
	IDYFSPNNFEIGWLSK
	IGNDILFISTIGNDLLGK
C4LXD1	IMTVSSTPKPEVK
	LSEIHGITDSSSTSVPELELK
	LVEPTQVIISAVPITETYSNVVK
	MTGINYEFVK
	SAIETITGNMNIITSK
	VTLDNIQLK
C4LTE2	IGAVVGIPATEKINYITK
	MFTDDEFPAELR
	VVGSYGEIEGGIPFLALSDLTGMPVKR
C4LTE3	AAFGKTVEEDFAK
	AGDAKVPAYYPTDDMIQEQK
	EYMASYFTLK
	ITALDKPAWNLEK
	ITALDKPAWNLEKLR
	KVPYLKEYMASYFTLK
	NGDHPHLLKF
	QKQVDESIVAEIK
	QVDESIVAEIK
	SAPQWFVPVK
	SAPQWFVPVKAGDAK
	SGALIVTGPFK
	SGALIVTGPFKINGVPLMR
	TVEEDFAK
	TVEEDFAKKQYEAK
	VPAYYPTDDMIQEQK
C4LXD7	ACTEAKSPVILQVSK
	ALKELYLHKVSDKVLNSAGK
	ANFQICKECVDNGFSNVMIDGSALPYEENVKLTK
	DTGVDALAISIGTSHG
	DTGVDALAISIGTSHGAYK
	DVEAFVKDTGVDALAISIGTSHGAYK
	EAVKSAVCKVNIDSDGR
	ECVDNGFSNVMIDGSALPYEENVK
	ECVDNGFSNVMIDGSALPYEENVKLTK
	EIDPEHKGVPISLNLDHGANFQICK
	EMFEHAIKGGFAVPGFNFNNLEQMQAIIQACTEAK
	EYANATLLR
	EYANATLLRN
	EYANATLLRNLAK
	FGVTVEGELGVLSGVEDDVAAAEHVFTDPK
	FGVTVEGELGVLSGVEDDVAAAEHVFTDPKDVEAFVK
	GAREYANATLLR
	GAREYANATLLRN
	GAREYANATLLRNLAK
	GAVEYSKEIDPEHK
	GAVEYSKEIDPEHKGVPISLNLDHG
	GAVEYSKEIDPEHKGVPISLNLDHGANFQICK
	GGFAVPGFNFNNLEQMQAIIQACTEAK
	GGFAVPGFNFNNLEQMQAIIQACTEAKSPVIL
	GGFAVPGFNFNNLEQMQAIIQACTEAKSPVILQVSK
	GGFAVPGFNFNNLEQMQAIIQACTEAKSPVILQVSKGAR
	GSALPYEENVKLTK
	GVPISLNLDHG
	GVPISLNLDHGANFQICK
	GVPISLNLDHGANFQICKECVDNGFSNVMIDGSALPYEENVK
	IPGFPIVLHG
	IPGFPIVLHGSSSVPQEWVAVINQYGGK
	IPGFPIVLHGSSSVPQEWVAVINQYGGKLESAIGIPEDQIR
	IRLDILHEVEK
	IRLDILHEVEKR
	LAMTGSIR
	LAMTGSIRR
	LDILHEVEK
	LDILHEVEKR
	LDILHEVEKRIPGFPIVLHG
	LESAIGIPEDQIR
	LESAIGIPEDQIREAVK
	LNLDHGANFQICK
	PKDVEAFVKDTGVDALAISIGTSHGAYK
	QALKELYLHK
	QALKELYLHKVSDK
	QALKELYLHKVSDKVLNSAGK
	QVVEYAHKFGVTVEGELGVLSGVEDDVAAAEHVFTDPK
	RIPGFPIVLHGSSSVPQEWVAVINQYGGK
	RIPGFPIVLHGSSSVPQEWVAVINQYGGKLESAIGIPEDQIR
	RYLAEHPKDFDPR
	SAVCKVNIDSDGR
	SAVCKVNIDSDGRL
	SAVCKVNIDSDGRLAMTGSIR
	SPVILQVSK
	SPVILQVSKGAR
	SPVILQVSKGARE
	SPVILQVSKGAREYANATLLR
	SSSVPQEWVAVINQYGGK
	SSSVPQEWVAVINQYGGKLESAIGIPEDQIR
	TVNYKELGLCNHK
	TVNYKELGLCNHKEMFEHAIK
	VINQYGGKLESAIGIPEDQIR
	VNIDSDGRLAMTGSIR
	VNIDSDGRLAMTGSIRR
	VSDKVLNSAGKSWY
	YLAEHPKDFDPR
C4M5E8	FNINYKTTPGNSVAVVGSCK
C4MAC6	KVTEENKILDDAR
C4LTE5	KKEMAIMLSDLYAIYNR
gnl|ALBU_BOVIN	AEFVEVTK
	AEFVEVTKLVTDLTK
	AFDEKLFTFHADICTLPD
	AFDEKLFTFHADICTLPDTEK
	AFDEKLFTFHADICTLPDTEKQIK
	AFDEKLFTFHADICTLPDTEKQIKK
	AFLGSFLYEYSR
	ATEEQLKTVMENFVAFVDK
	ATEEQLKTVMENFVAFVDKCCAADDKEACFAVE
	ATEEQLKTVMENFVAFVDKCCAADDKEACFAVEGPK
	CCAADDKEACFAVE
	CCAADDKEACFAVEGPK
	CCAADDKEACFAVEGPKL
	CCAADDKEACFAVEGPKLVVSTQTALA
	CCTESLVNR
	CCTKPESERMPCTEDYLSLILNR
	CVLHEKTPVSEKVTK
	DAFLGSFLYEYSR
	DDPHACYSTVFDKLK
	DPHACYSTVFDKLK
	EACFAVEGPK
	ECCDKPLLEK
	ECCHGDLLECADDR
	ECCHGDLLECADDRADLAK
	EFVEVTKLVTDLTK
	EPQNLIKQNCDQFEKLGEYGFQNALIVR
	EYEATLEECCAK
	EYEATLEECCAKDDPHACYSTVFDK
	EYEATLEECCAKDDPHACYSTVFDKLK
	FKDLGEEHFK
	FKDLGEEHFKGLVLIAFSQYLQQCPFDEHVK
	FPKAEFVEVTK
	GLVLIAFSQYLQQCPFDEHVK
	GLVLIAFSQYLQQCPFDEHVKLVNELTEFAK
	HLVDEPQNLIK
	HLVDEPQNLIKQNCDQFEK
	HLVDEPQNLIKQNCDQFEKLGEYGFQNALIVR
	HLVDEPQNLIKQNCDQFEKLGEYGFQNALIVRY
	HPEYAVSVLLR
	HPYFYAPELLYYANK
	HPYFYAPELLYYANKYNGVFQECCQAEDK
	KFWGKYLYEIAR
	KQTALVELLK
	KVPQVSTPTLVEVSR
	KVPQVSTPTLVEVSRS
	LAKEYEATLEECCAK
	LAKEYEATLEECCAKD
	LAKEYEATLEECCAKDD
	LCVLHEKTPVSEK
	LCVLHEKTPVSEKVTK
	LFTFHADICTLPDTEK
	LFTFHADICTLPDTEKQIK
	LFTFHADICTLPDTEKQIKK
	LGEYGFQNALIVR
	LGEYGFQNALIVRY
	LKECCDKPLLEK
	LKHLVDEPQNLIK
	LKPDPNTLCDEFK
	LKPDPNTLCDEFKADEK
	LRCASIQKFGER
	LSQKFPKAEFVEVTK
	LSQKFPKAEFVEVTKLVTDLTK
	LVNELTEFAK
	LVNELTEFAKTCVADESHAGCEK
	MPCTEDYLSLILNR
	MPCTEDYLSLILNRL
	NECFLSHKDDSPDLPK
	NYQEAKDAFLGSFLYEYSR
	PHACYSTVFDKLK
	PNTLCDEFK
	PNTLCDEFKADEK
	QEPERNECFLSHKDDSPDLPK
	QIKKQTALVELLK
	QNCDQFEK
	QNCDQFEKLGEYGFQNALIVR
	QNCDQFEKLGEYGFQNALIVRY
	QNCDQFEKLGEYGFQNALIVRYTR
	QTALVELLK
	QTALVELLKHKPK
	RHPEYAVSVLLR
	RHPYFYAPELLYYANK
	RHPYFYAPELLYYANKYNGVFQECCQAEDK
	RPCFSALTPDETYVPK
	RPCFSALTPDETYVPKAFDEK
	SHCIAEVEKDAIPENLPPLTADFA
	SHCIAEVEKDAIPENLPPLTADFAE
	SHCIAEVEKDAIPENLPPLTADFAEDK
	SHCIAEVEKDAIPENLPPLTADFAEDKD
	SHCIAEVEKDAIPENLPPLTADFAEDKDVCK
	SHCIAEVEKDAIPENLPPLTADFAEDKDVCKNYQEAK
	SLHTLFGDELCK
	SLHTLFGDELCKVA
	SLHTLFGDELCKVASLR
	SLHTLFGDELCKVASLRE
	SQKFPKAEFVEVTK
	SQKFPKAEFVEVTKLVTDLTK
	TALVELLK
	TCVADESHAGCEKSLHTLFGDELCK
	TRKVPQVSTPTLVEVSR
	TVMENFVAFVDK
	TVMENFVAFVDKCCAADDKEACFAVEGPK
	VASLRETYGDMADCCEK
	VHKECCHGDLLECADDR
	VPQVSTPTLVEVSR
	VPQVSTPTLVEVSRSLGK
	YICDNQDTISSK
	YLYEIAR
	YNGVFQECCQAEDK
	YNGVFQECCQAEDKGACLLPK
	YTRKVPQVSTPTLVEVSR
Q76L90	SLNLLNDLNQLKGEFNVIEK
C4LXE4	DRFFIPEDSKVSDFVK
	FFIPEDSKVSDFVK
	KAFAIQLR
	QKKPNYVPLVVESDGTSNAIELKK
	VLVDKYIETDGETPISTVSVK
C4M9E1	IKEEVIEPIQR
	LVEACTIMEKR
	RLDMDAAHDKYESIAK
C4MAB3	ATGNIVNIGPYEQVFLDIK
	IVGGDNIDSGLQK
	LIMDGTEGVNDTELGKR
	LPSIYIPVLLNGK
	MLNPNKPSNELKELTR
	STGPISIVTHQPIKGR
C4LXE8	AAAAEKGLPLYK
	AAAAEKGLPLYKYLAELTGHK
	AAAEKGLPLYK
	AGYTGKIEIAMDCAASEFYNEETK
	AGYTGKIEIAMDCAASEFYNEETKK
	AGYTGKIEIAMDCAASEFYNEETKKYDLGK
	AKYGQDATNVGDEGGFAPNVSGAR
	AKYGQDATNVGDEGGFAPNVSGAREALDLLVEAIAK
	ATNVGDEGGFAPNVSGAR
	AVENVNTIIGPALLGK
	AVENVNTIIGPALLGKNVLNQAELDEMMIK
	AVENVNTIIGPALLGKNVLNQAELDEMMIKLDGTNNK
	CVPSGASTGVHEAVELR
	DPSLVKDVDGLIAEYVDYGK
	DVDGLIAEYVDYGK
	EALDLLVEAIAK
	EILDSRGNPTIEVEITTGK
	EILDSRGNPTIEVEITTGKGMFR
	EILDSRGNPTIEVEITTGKGMFRS
	EMTMPVPCFNVINGGAHAGNALAMQEFMICPTGATNFHEALR
	FTVEHGNFQIVGDDLLVTNPAR
	GAREALDLLVEAIAK
	GGKGVLKAVENVNTIIGPALLGK
	GKLGANAILGCSMSICR
	GKLGANAILGCSMSICRA
	GNPTIEVEITTGK
	GNPTIEVEITTGKGMFR
	GNPTIEVEITTGKGMFRS
	GVLKAVENVNTIIGPALLGK
	GWGVMASHR
	HGNFQIVGDDLLVTNPAR
	IEEELGNIPYAGK
	IEEELGNIPYAGKNWR
	IEEELGNIPYAGKNWRNSTA
	IPADKKDPSLVKDVDGLIAEYVDYGK
	KDPSLVKDVDGLIAEYVDYGK
	KIPADKKDPSLVKDVDGLIAEYVDYGK
	LCKYNQLMR
	LCKYNQLMRIEEELGNIPYAGK
	LCKYNQLMRIEEELGNIPYAGKNWR
	LDGTNNKGKLGANAILGCSMSICR
	LGANAILGCSMSICR
	LGANAILGCSMSICRA
	MAAETYQCLK
	MAQEKGWGVMASHR
	NACNSVLIK
	NACNSVLIKVNQIGTLTETFK
	NACNSVLIKVNQIGTLTETFKTIK
	NFQIVGDDLLVTNPAR
	NPTIEVEITTGKGMFR
	NVLNQAELDEMMIK
	NVLNQAELDEMMIKLDGTNNK
	NVLNQAELDEMMIKLDGTNNKGK
	PFAEDDWAAWNKFTVEHGNFQIVGDDLLVTNPAR
	PSLVKDVDGLIAEYVDYGK
	QMAMDKNACNSVLIK
	SCVPSGASTGVHEAVELR
	SCVPSGASTGVHEAVELRDGDK
	SGETEDTFIADLVVGLNCK
	SGETEDTFIADLVVGLNCKQIK
	SGETEDTFIADLVVGLNCKQIKTGAPCR
	TIKMAQEKGWGVMASHR
	VENVNTIIGPALLGK
	VHAREILDSRGNPTIEVEITTGK
	VLKAVENVNTIIGPALLGK
	VNQIGTLTETFK
	VNQIGTLTETFKT
	VNQIGTLTETFKTIK
	VQMAMDKNACNSVLIK
	VQMAMDKNACNSVLIKVNQIGTLTETFK
	VVIKAKYGQDATNVGDEGGFAPNVSGAR
	YGGKGVLKAVENVNTIIGPALLGK
	YGQDATNVGDEGGFAPNVSGAR
	YGQDATNVGDEGGFAPNVSGAREALDLLVEAIAK
	YLAELTGHK
	YLAELTGHKE
	YLAELTGHKEMTMPVPCFNVINGGAHA
	YNQLMRIEEELGNIPYAGK
	YNQLMRIEEELGNIPYAGKNWR
	YNQLMRIEEELGNIPYAGKNWRN
C4M5D7	NNIGLIGPSFPMTPVDKLAECIVNNMYNQK
C4M5D4	ILGSPTVDEVK
	INSQQAVAPVPKPSEENA
	LFSYELAR
	VNPLVIFGNQEGLVLENEDTKYR
O15581	FEELLSK
	FEELLSKIDRR
	GKSMEGGEPEYIKNGDSALVK
	GYTPVLDCHTSHIACK
	GYTPVLDCHTSHIACKFEELLSK
	KGYTPVLDCHT
	KGYTPVLDCHTSHI
	KGYTPVLDCHTSHIACK
	KGYTPVLDCHTSHIACKFEELLSK
	NQPAVGCEDFTAQVIVMNHPGQIR
	NQPAVGCEDFTAQVIVMNHPGQIRK
	NVVSDAKNQPAVGCEDFTAQVIVMNHPGQIR
	SMEGGEPEYIK
	SMEGGEPEYIKNGDSALVK
	TGKSMEGGEPEYIK
	TGKSMEGGEPEYIKNGDSALVK
C4M9B0	EFQHPKVDIYASK
	EGPKENVVVIDMWYGNRR
	ENVVVIDMWYGNRR
	HIEMYDGVVVK
	HIEMYDGVVVKK
	KLGKDEICLEGNDVEK
	KLGKDEICLEGNDVEKVSQSAANIHAANLVR
	KTEHVVIPEGVTIEINKK
	LGKDEICLEGNDVEK
	LGKDEICLEGNDVEKVSQSAANIHAANLVR
	NKDIRQFLDGVYVSEKCLIENDA
	QFLDGVYVSEK
	QFLDGVYVSEKCLIENDA
	SIQVQNFLGEKR
	TEHVVIPEGVTIEINKK
	TIASHIKNMITGVTK
	TRHIEMYDGVVVK
	TRHIEMYDGVVVKK
	VSQSAANIHAANLVR
	VVYAHFPVTLVIADDGK
	VVYAHFPVTLVIADDGKSIQVQNFLGEK
	VVYAHFPVTLVIADDGKSIQVQNFLGEKR
C4LXB1	AKIEQELSQKCDDVLK
	CDDVLKIITEFLLK
	EAFDEAIQK
	EAFDEAIQKLDEVPEESYKDSTLIMQLLR
	EDLVYLSK
	EVADKSLAAYQEATDTAASLVPTHPIR
	GNTQRVELIKTYR
	IISSLEQKE
	IISSLEQKEQAK
	IISSLEQKEQAKGNTQR
	IITEFLLK
	LAEQSERYEEMVQYMK
	LGLALNFSVFYYEIMNDADKACQLAK
	NLISVAYK
	NLISVAYKNVVGSR
	NLISVAYKNVVGSRR
	QVAEMGTELSVEER
	SLAAYQEATDTAASLVPTHPIR
	TSREDLVYLSK
	TSREDLVYLSKLAEQSERYEEMVQYMK
	YAEFTVDEK
	YYAEFTVDEK
C4M9B1	ILDEVVNDPDEK
	ITSILISLFLDKPSSAAR
C4M9B6	ATAALVNAAALAQKER
	ATVQLVTAAR
	AVAEATKEIVTVANNNVTPGCEK
	DLTILNATGNAYR
	EEKRKQIENELNQLKEVMAKETQLK
	IMLDGPQQACTTR
	LATPTKPYAPNQVWSEGLVTAGK
	QTTSDLYDSVK
	SMQTLLEDLKGVEPK
C4LXB7	LAGVLKDDIQPYLNTIVPIIISR
	MQFEQVISALQSPNNEVR
	MQFEQVISALQSPNNEVRK
C4LXB8	TTTIKGYDFDKGINYEELVNSYLTTGIQSSNVGR
C4LXB9	CGIQGLVR
B1N4D7	KIYYSSSLNKMLLCYGTDYLQEIPLETINFYLN
B1N4D4	GIHVAGEINELCNILVDVYKQK
C4M5C4	AIAEMDNFEVEGR
	AIAEMDNFEVEGRK
	AIAEMNNFEVEGR
	FGVVEITLIK
	GFAFIEFATPQEAEK
	IISTPIGYSR
	ITVAAAYK
	ITVTSAYQR
	KAIAEMDNFEVEGR
	KGNVTKNNGIAFITVK
	KITVTSAYQR
	LFEKYDVVEATIVK
	LFEKYDVVEATIVKR
	LFEKYDVVEATIVKRH
	NEVTDNMLFIK
	NLPFAITEEK
	NLPFTLTDEGFKK
	RTNEVTDNMLFIK
	SKGYGFVTFK
	SKGYGFVTFKTAEQQKK
	SLSETNVFVK
	TAEEQKKAIAEMNNFEVEGR
	TAEQQKKAIAEMDNFEVEGR
	TNEVTDNMLFIK
	TTLYVSHLDYSLKVEDVQNAFK
	TTLYVSHLDYSLKVEDVQNAFKTYNPK
C4LTC5	AFEEAEKNSPAIIFIDEIDSIAPK
	AFEEAEKNSPAIIFIDEIDSIAPKR
	AIANETGAFFFLINGPEIMSK
	GAAPCVLFFDELDSIAQSR
	GILLYGPPGCGK
	GLVNSIPQEQPNQR
	IREMVELPLRHPQLFK
	KSPVAPDVNLRDIANATEGFSGADLTAICQR
	RYESFVNTLK
	SPVAPDVNLRDIANATEGFSGADLTAICQR
	TVFIIGATNRPDIIDPALTRPGRLDQLIYIPLPDLEAR
	VGVLQANLR
C4M5C6	AAGGIRTFDDAMKMINNGASR
	CVAAGAEYVK
	IGASAGIAILNGIH
	TFDDAMKMINNGASR
	VAVEQGAEEVDMVINIGMVK
	VCTVIGFPLGATPSEVK
	VCTVIGFPLGATPSEVKAYETK
	YIDHTLLK
	YIDHTLLKADATEEQIR
	YIDHTLLKADATEEQIRK
C4LTC7	KVINVKLIYSK
C4M5C8	KYTTHNAIFEYPFHAPYVFFK
C4M5B9	KGGEIGEYGDIFILFTEKETN
C4LXC1	AFTTYQEDLFDFHSYIFNR
	FSADTYLACVR
	ILSDIASKKTDPQA
	IVFDSIKIETPTIENLMVK
	KVNVEDILGR
	KYDIYVNLLDTLKNELTDNEDLQFLNLTNVQR
	LITENEHILIDKIITLER
	LIVKSDIAQAR
	LLKKENKLPEAAEAMDAAR
	QVQQPTTPVVCNVPVKDQQILPR
	SLLFSAQSDIESNLLGR
	SSPSDKSDSLSYIISLYK
C4M9C0	IGFYLFETK
C4LXC0	ILVVSGAQEGSALSR
	NKYGIIGPIPFSEFNVDSLYK
	NKYGIIGPIPFSEFNVDSLYKK
O15593	AGFAGDDAPR
	AGFAGDDAPRA
	AGFAGDDAPRAVFPSIVGRPR
	AGMGQKDAYVGDEAQSK
	AGMGQKDAYVGDEAQSKR
	AVFPSIVGRPR
	DAYVGDEAQSK
	DAYVGDEAQSKRGILTLK
	FPSIVGRPR
	GILTLKYPLEHGIVNNWDDMEK
	GILTLKYPLEHGIVNNWDDMEKIW
	HVSVMAGMGQK
	HVSVMAGMGQKDAYVGDEAQSK
	HVSVMAGMGQKDAYVGDEAQSKR
	HVSVMAGMGQKDAYVGDEAQSKRG
	PSIVGRPR
	SVMAGMGQKDAYVGDEAQSK
	SVMAGMGQKDAYVGDEAQSKR
	VFPSIVGRPR
	VMAGMGQKDAYVGDEAQSKR
	VSVMAGMGQK
	VSVMAGMGQKDAYVGDEAQSK
	VSVMAGMGQKDAYVGDEAQSKR
	YPLEHGIVNNWDDMEK
C4LXC4	IYVDLQGSK
	IYVDLQGSKIR
C4LXC3	ASEGLITLNEK
C4LXC2	MEAVQFGENLFR
C4LXC8	CLRFDELALK
	CLRFDELALKAPTGR
	CLRFDELALKAPTGRK
	FDELALKAPTGR
	FDELALKAPTGRK
	HPEETAVCVNTVTYDSRYPVPK
	KHPEETAVCVNTVTYDSRYPVPK
	MNVCALK
	MNVCALKFTK
C4MAD2	AVSSENEKLLVELDIEKK
C4LTB2	TKGDLVSAFFEFQ
	VGLVEVPNVIEFSLKR
C4M5B7	DGSLNYVNENDEVLISGFGR
	DGSLNYVNENDEVLISGFGRR
	ITAFVPRDGSLNYVNENDEVLISGFGR
	KITAFVPR
	LGIETKQPNSGIRK
	RGHAVGDIPGVR
C4LTB5	EIIVASFDGNKFTTEAK
	EIIVASFDGNKFTTEAKLNEHDAR
	FACASGNKLVAVCR
	GSYSPFSEEDISSPK
	IAYSPCSKEIIVASFDGNKFTTEAK
	IDFAATDIKWSPNESK
	IFNAFNK
	IFNAFNKTLDPKGSYSPFSEEDISSPK
	IVSCSEDRNAYVWTQNENGEWVPVLVLLR
	SFHLCDNIGCHCWNGDATK
	SSISFIEANNGKPTVQTIK
	STGTMSAMDHFK
	TLDPKGSYSPFSEEDISSPK
	VAWSPDSLTVAAASTDFKAR
	VTGIDWAAQSNR
C4LXH9	MKPLNNTLKPSR
C4M9H6	KGNDSALLQSVLLFVDAVQEK
C4LXH4	TANKFEVLLNRVEGK
C4LSX6	AQQEATILQK
C4LT96	NMLPCGLYKFPVR
	NTTDLEMIMMQNRK
	YAAEISHAVSAK
C4M596	AKVDDLILLSK
	FVTNLYQTVNAPK
	GVDVSMEEFLLNWVNKALEEEGVDKR
C4M9H2	LFDGTSLISEYEKER
Q769I7	AGKPITPLLHGGEQMGGLR
	ATHDINIENTYVR
	FGEDLSHTGIR
	FGEDLSHTGIRLSLSRFNTE
	FNTEEEIDYTIDIIKK
	GIEVIKMPVNEDGVVDPKDLER
	GVGALFIR
	IAHDHGALFHSDATQAMGK
	LIDDKTALVS
	SGTIDTPSVVGMAVALK
	SGTIDTPSVVGMAVALKK
	SVYLDNNATTMVDPEVLNSMLPYFSEIYGNPNSLHAFGQK
	TIPDVTIVGKPELR
C4LSX4	ATVGPIVADKACMK
	LAPNIYCGGAGTAADLTHATNFIATK
C4LSX5	AFGDFKDFLVK
	DALETYLNALEEDINKDTAITNVLSTSAK
	EAAIEKAKEADSNYR
	FGLAYTALPDAANKFVDFTR
	GLISDGNKMTK
	HSSGWWFATNSQGQSGFVPENFVEVI
	LYKEAEAATAAVEK
	SFAENLIDGLDVVYK
	SFAENLIDGLDVVYKHSQNNTK
	SKFDAIDADADINTFATTK
	VFENDIKELEK
	VFENDIKELEKQSK
C4LXH0	TLEVPTKR
C4LT93	AEMARPDSQDGQLISSLIK
	AEMARPDSQDGQLISSLIKEGK
	GTQCDKLVEKFPITHLSAGELLR
	SDIKYVYFILGGPGAGK
	VSGEGSVEEVFK
	VSGEGSVEEVFKTINEEMTK
	VSGEGSVEEVFKTINEEMTKFYTEK
C4MAF8	KQDYEQLTEDDKAYNEHEIQR
	MSEIAGYIRDMAYILGSEDNISCVVCHF
	TLDLSSNHLKR
	TLPSQINIPSLK
	TPITGPVIFTSQTPLEHFSLGKPNSMR
	TVVLIDVSMNRIQEIPSQINSIPK
	VVDVGGYITK
gnl|K1C15_SHEEP	ALEEANADLEVK
	LAADDFR
	QSVEADINGLR
	QSVEADINGLRR
	VLDELTLTK
C4LXI8	IYTEVLETTKQPK
	TGILTNLAACIVSDPSIDSSLLGTK
	YNIEKYDEALSLLGSEEKDKVLK
C4LXI9	FQCPEALFQPEK
	IADDAVLVFDCGSSFIK
	IVNPALMA
	RPLLNHIILSGGSTLFPGLPERLEK
	SMMFNDLNVPFLK
C4M9I4	FRDYMDEDIEDGGFEMNTK
	SAHFFNVK
C4LXI4	IVVDVQGNKVTTGDCLK
	KLTSEETSKLQPVAIANPK
	KVVVEGNFETFPIAGDLPR
	MGINDIEFNPNTISSVR
	SVYVDEGSNEVSPVITFLK
	VAGYATGSMVNLLK
C4M588	INILESFQALVR
C4M4W9	ALYIEHTPFSEDNDLLTPSMK
	ELPTADILGYK
	GIPSFAIPR
	HYAVEIDKMR
	ILSIGVPFLHTTFR
	KLKSIINGSAPITMEIYNYFK
	LITPPSYLLGK
	SLVDIISIGK
	SNPTPTDLPSVDDIYSIFFTSGTSGNPK
C4M9I7	AGTDEIKITDFGLSR
	ENAILDECEILK
C4LXI1	KEEEKEPLLYSN
C4LT84	SNWKEVIGTIPSSFCPR
C4LT85	EPSFITNSFVGTAEYLAPEVIVGYGH
	GAEEIKSHK
	NRDQVFSQILDGEVLFPK
	NTQPTLVTPQQPQDKAPAQIILGDTLPK
C4M9I2	DLYNYLRNEIIADVEK
	FKNILDVIK
	FKNILDVIKK
	ICALDPAPIITPGESSMVIDANVFSK
	ICALDPAPIITPGESSMVIDANVFSKK
	IDEGVNTYETR
	IDEGVNTYETRIESDIIVPLK
	IDEGVNTYETRIESDIIVPLKTYMEQFK
	IESDIIVPLK
	IESDIIVPLKTYMEQFK
	KEGDWWLGELKGQQGYFPYNYVSPL
	LAPTVHATNLMQVEVLTSLGDCVVNTSPETK
	LTSSAEEVVSPICGTLIVSYTDYLNHLNNYWGEASEVSSNFR
	NEIIADVEK
	QSGLGEAQNKYNVAR
	RVDMDRYHDSVLSISK
	SDIDSIISTFQK
	SDIDSIISTFQKIDEGVNTYETR
	SDIDSIISTFQKIDEGVNTYETRIESDIIVPLK
	SGIGDAFGRK
	THVGAGQKTMDSDVQYAK
	TMDSDVQYAK
	VDMDRYHDSVLSISK
C4LXI2	ILDKDYDPLPVFLVR
	VISETSPENTEIAIRVHDLR
C4M4W6	IISDAISGASNEILVLIHR
C4M581	KSQLFLLIDGR
C4LT81	AEAVAQPVETVAHTFAPK
	INQALYLMTMGCR
	IQCPIVER
	LFNKWSYDVTVSDISLKELLAINSK
	LKYQVFLPHTAGR
	LKYQVFLPHTAGRY
	NSKTLAECLADEIVNASK
	QAVDVSPLR
	RINQALYLMTMGCR
	SNTASFAIK
	SNTASFAIKKKEDMER
	TLAECLADEIVNASK
	TLAECLADEIVNASKSNTASFAIK
	VVEESFEIIHLLTEKNPIQVLVDAIINASPR
	VVEESFEIIHLLTEKNPIQVLVDAIINASPREDSTR
	WSYDVTVSDISLKELLAINSK
	YQVFLPHTAGR
	YQVFLPHTAGRY
C4M9F9	AKLPIYSAVYK
	AKLPIYSAVYKNITGEK
	AQVSTEVVVK
	AQVSTEVVVKKPGFDAYSK
	ASFEKVIEALEK
	ASFEKVIEALEKK
	ATVIFIPLR
	AVHEAYLNEMLYPVEVAGQR
	EAVAGIPELK
	EAVAGIPELKGVK
	KLNGPVFIIGK
	KLNGPVFIIGKR
	LNGPVFIIGKR
	LPIYSAVYK
	LVKEAVAGIPELK
	QVSTEVVVKKPGFDAYSK
	TVFVAVDDAK
	TVFVAVDDAKLK
	TVFVAVDDAKLKNSVK
	VKFAFPVVA
C4LSV8	GFGGIGGILR
C4M4V9	ITVLYDKPFININSTQSQKVELFSR
	NVVRPLFLAEQEK
C4LXF2	NANKEVTPVIETQPVITK
C4MAI1	SSQEETAATPSTTAPSQTQQESQSNSEDNKK
C4LXF6	NIYFLNSCGIDYYNKK
	SISTHSIPIHLR
C4LSV0	ADNLEVILLRR
	AENFVILR
	ARIAVAGITGTSPAPGFFK
	ATLNSAMCVTNFASQLIER
	ATTYQAYLDTIR
	ATTYQAYLDTIRATLNSAMCVTNFASQLIER
	EVIFKPVVIVR
	FVSFLQQR
	HNKPEVELGLSK
	IAVAGITGTSPAPGFFK
	IAVAGITGTSPAPGFFKALLA
	VMIEGSINSVR
	VPSEPSGEENGVDKCEK
C4LSV1	ANIDSNKVWSR
	GVVASNKTEVAFKDVECAILVAGMPR
	IMKEQALALKNFANPHVR
	IVCMGVYSEGQYGIPK
	KELIGINTR
	MELADCCFPLVK
	NSEEELIEEQKLETAFEEITQQSHVHD
	RVADLVEESWLESFNKTVQER
	VADLVEESWLESFNK
	VADLVEESWLESFNKTVQER
	VADLVEESWLESFNKTVQERGAK
	VLVVANPANTNALVVANNAGIDVK
	VLVVANPANTNALVVANNAGIDVKQITCLTR
C4M571	KYDIPFFFDAAR
	LQIERPNFFILPQGR
	NNGFHTVNLFAK
C4M574	AEETQVQQEIQELPQELKDIK
	AEETQVQQEIQELPQELKDIKAVLYQAR
	CSCAVIGNNIK
	CSCAVIGNNIKFTDELKR
	IQLGEWTNQCK
C4LSV5	KMIIELLTNELVKR
C4LXF0	IGGNVLQTNVVVK
C4LSV2	ADSIDSQQLMR
	CMDILEVTDDEIFAYQKEFDKLPK
	FGNDFMAK
	FSGAYCNLPLLEHMTFIDSPGVLSGEK
	FSGAYCNLPLLEHMTFIDSPGVLSGEKQR
	IVLNKADSIDSQQLMR
	IWSIADSGK
	IWSIADSGKNGSLNAHQYILAK
	KAELIADLNNVFNIIMR
	KAELIADLNNVFNIIMRK
	KYPMEDSLSSSSNPFEASTGYEK
	LIASIDDVLGTDIPMLLK
	LNELDFTKFPK
	NGSLNAHQYILAK
	NQIDESYTSVIDGIKK
	SLLQNGGYPDDLPPVE
	SYDFNEVVR
	TNAYITSYLR
	TNAYITSYLREQMPTFGK
	VMQTPECLR
	VYGALMWSLGK
C4M573	MNSELLQLQQFIASIVTK
C4LT73	NVLLNIAVGPLHKQKELEK
B1N4A1	EIQTALPDLGFDLNTK
	FLNLVMSLVDDA
	FVELTTSVFR
	IQLPQFIGCAAYLGQIR
	KIQLPQFIGCAAYLGQIR
	KYDVDKSGNLDLKEIQTALPDLGFDLNTK
	QAQGDFNRPVFAK
	SCQVITKLCGK
	SGNLDLKEIQTALPDLGFDLNTK
	SGTLELTELR
	SLFAIQQAADAWIVQNITATYQADENIKK
	TIYQHGFKQAQGDFNR
B1N4A4	ATAVLYTPPFEHFGIVPLEAMIK
	IIIAGGYDLR
	KATAVLYTPPFEHFGIVPLEAMIK
	TAIIIHPDLGIGGAER
	VALEALSLLEDDLKNNVR
	VSEVVHQVISN
C4M4U5	KKDIHETR
C4LT65	AIVGMDVGTQFTK
	LQPIALVNSPMAFASSLAVNR
	NVDAQEGGAFGAAYYALMQGLGR
	TITEYFGEEK
	TQYQTTVTDGVLTVSPSSTPIER
	VQNQVNVSDEKGGLYR
C4LXG4	EAVDAAEKLGYR
	EAVDAAEKLGYRY
	FTQMMEVALSLAK
	KQALCMLTISDLCYGSGEK
	LLADTYLTDVVQYNSVR
	LLADTYLTDVVQYNSVRG
	QYDIPGKYSCIADFQLCR
	RTKFTQMMEVALSLAK
	TKFTQMMEVALSLAK
	VKLLADTYLTDVVQYNSVR
	YGEIAETVLMAGDPLR
	YGEIAETVLMAGDPLRVK
	YSCIADFQLCR
C4M4U8	YQETIKEGSNYK
C4M569	AAYPDLTMDIFGK
	ANGQTVPVAIRPSNVIITK
	EKYNVIAIPIHKDDEVK
	MAEKLMSKPTLR
	MAEKLMSKPTLRA
	SKYVINIDKLTK
	TKANGQTVPVAIRPSNVIITK
	YNVIAIPIHKDDEVK
	YVINIDKLTK
C4LXG7	FKTQHPEMDFSNAK
	TQHPEMDFSNAK
C4LXG8	AAIATPSPETEEAAWK
	AIIPQVQTINSFFEYSR
	GKFNVLECVR
	IVAIPINFSATPSAAEQEPFQTINEVASHINEMLQK
	LANPGLQNDFSYYR
	LANPGLQNDFSYYRR
	TLQTYQEEEVALLANSLK
	TLQTYQEEEVALLANSLKYSTK
C4MAH1	MEQLIQVIAATQNPSLR
C4M561	ALAVNEKPYCELCGR
	CTACGQPISVYAYEFCGYPYHDTCIK
	KEEPKPTTSKEPELISR
	SNIVTGEEAVLMWSNMR
	SVTLFAAELMK
C4LSU3	AFTAVYPALNMDIFGK
	ANGQTVPIAIRPSNVIITK
	EKYNVIAIPIHKDDEVK
	MAEKLMSKPTLR
	MAEKLMSKPTLRA
	SKYVINIDKLTK
	YNVIAIPIHKDDEVK
	YVINIDKLTK
C4LXG1	AGKQALTICSISDCPFKETALSAEER
	LPGTFCPIADYELVHK
	QALTICSISDCPFKETALSAEER
	TNTPTPHNNANIADFADTVLVAGDPLR
	TNTPTPHNNANIADFADTVLVAGDPLRCK
C4LXL1	IGEAREELMK
	ILMVGLDAAGK
	KWYCQTSCATNGDGLYEGLDWLADNLK
	LKLGEIVTTIPTIGFNVETVEYK
	MLNEDEMR
	MLNEDEMRN
	NAILLVFANKHDLPQAMSISEVTEK
	NAILLVFANKHDLPQAMSISEVTEKLGLQTIK
	WYCQTSCATNGDGLYEGLDWLADNLK
C4LXL0	AKLDEILKQR
	ATYDAEMKLVDNLTPEELSAAIQR
	AVNDGIINSQLLAYFMGR
	AVNDGIINSQLLAYFMGRT
	ELQLEDKEAEYITLGK
	LMTIYPVEEVKEN
	LVDNLTPEELSAAIQR
	NGIKAPDTGNDLSEPLAFNLMFATDIGPAGDLK
	NLEFNGGKVPFGVTQIGNVFR
	NLEFNGGKVPFGVTQIGNVFRNEIAPR
	SVLSIPASIAPVK
	VREFTLAEIEYFVLPDKK
C4MAK5	AADPNIYVPVHMRR
	EIAQNAISKLDGYLLEYAK
	IYAISENVER
	LSNIPASVDETVIK
	QADGDYNPDVSIR
	QLAFFFPKEEEETNGDEIIIKR
B1N3Y5	AFDNQEAFTK
	AFDNQEAFTKFLNILR
	ALDALKQLQLKEDGFSYLK
	LNEKAFDNQEAFTKFLNILR
	LRPLSLLLFFIGGGGK
	LRPLSLLLFFIGGGGKIEEQK
	MEQLVLLVEEK
	STCHQFQAECIDIMEK
	TFYDKYIER
C4MAK2	DKTVIPEVQAEQLLR
	DLVIFVIDSSPFTLSVLKR
	EGTSPVAEHISFEK
	FYYDSWSSDTIFEFLKEGTSPVAEHISFEK
	GIMDFVSQFFK
	GQELLKEETAKEEK
	IELTVEQVKELLK
	KIHPFFLLVAK
	KLMGDDTFMSLITPFYQELHSVKR
	LMGDDTFMSLITPFYQELHSVK
	LMGDDTFMSLITPFYQELHSVKR
	LNDAMTDMLDFNHQLPIFWYFSAK
	MLFIQVDGKDIELGLYGQTSAPSATILHANGR
	SLDNISEDITNYFNNKLNPLIR
	SSKDKTVIPEVQAEQLLR
	TMYPLKSLDNISEDITNYFNNKLNPLIR
	YAISSLPSFILQRPGYQK
C4M9L9	IVLATPVEIIKN
C4LXL8	CAFGSYGNTLMK
	HCPEIEVIGLTHNKVK
	IAAPLLEK
	QANMDPESLIK
	TLSLGQNDITSEIPNDLNGLINVATIDLSNNK
	TLVTAYLQYTDVEGPIPPLYSSSLR
Q963D1	LGIPFLETSAK
	LLLIGESGVGK
	LQIWDTAGQER
	NIEANADQNVNK
	NSLKVDDCFISLAR
	NSLKVDDCFISLARDVIQR
	SEKDSTIKLLLIGESGVGK
B1N3Z3	AAGIQQTNPLDAFKNAGLFK
	LANGSTNTQMSFSR
	SKPDTQLLKEFLIGCIQLK
	SSYTNTILK
C4M9M6	ACCDKLFEQTK
	AFQGFCIHAGGR
	FNLTDEDCMPSR
	IHNAIDDNAYK
	NIIHPSPLVIFLEQTPK
	SGGAAILLTNKK
	SVEQANYWYPSQQGEQNEILPK
	TLINYISDVIDENVK
	TLINYISDVIDENVKILFPK
	VIFHDEDETGSDGVSIGR
	VLQLAFGSGVK
	VTGLGQHTHLPK
C4LXM0	FNVTLSEFDKWEANLLPSR
	FNVTLSEFDKWEANLLPSRHF
	HFGALVLTTSYGILDNTEAR
	HQYITDYTVVDTHR
	IVVNLNGR
	IVVNLNGRLNK
	SGKIVVNLNGR
	SGKIVVNLNGRLNK
	VICEFLNVMMK
	VICEFLNVMMKHQYITDYTVVDTHR
	VNVLADALK
	VNVLADALKSITNAEK
	VRVNVLADALK
	VRVNVLADALKSITNAEK
	VRVNVLADALKSITNAEKQGK
C4M9M2	AMMNTIITAQGEEFPLQGMTLVLR
	VLLATLSSAVPQHSCEIPITGETVK
	VLLATLSSAVPQHSCEIPITGETVKLICEGK
C4MAJ1	VLLLSPLQR
C4MAJ4	AGATILPGITIGENSVVGAASVVTHDVPDNTVVAGNPAR
	ATPTFDERSLMLNGK
	DGAWIGAGATILPGITIGENSVVGAASVVTHDVPDNTVVAGNPAR
	IGNHVLIGPNVQLIAATHPTDPLIR
	IIDFNCER
	LEMLKDIVGSLGENSCILPPFR
	NSLVEYGLPIVIK
	RLEMLKDIVGSLGENSCILPPFR
	SLMLNGKLYDSTVPELAHDRESCCEK
C4MAJ3	TTALVKELNPGVQK
	VREIVYPLQR
B1N3Z9	KIELEPADVVLSK
K1C9_HUMAN	AALEKSLEDTKNR
	DIENQYETQITQIEHEVSSSGQEVQSSAK
	EIETYHNLLEGGQEDFESSGAGK
	GGGGSFGYSYGGGSGGGFSASSLGGGFGGGSR
	GGSGGSHGGGSGFGGESGGSYGGGEEASGSGGGYGGGSGK
	HGVQELEIELQSQLSK
	HGVQELEIELQSQLSKK
	IGLGGRGGSGGSYGR
	IKFEMEQNLR
	KDIENQYETQITQIEHEVSSSGQEVQSSAK
	LASYLDKVQALEEANNDLENKIQDWYDK
	MRLEKEIETYHNLLEGGQEDFESSGAGK
	MTLDDFR
	NRKDIENQYETQITQIEHEVSSSGQEVQSSAK
	NYSPYYNTIDDLKDQIVDLTVGNNK
	NYSPYYNTIDDLKDQIVDLTVGNNKTLLDIDNTR
	QGVDADINGLR
	QVLDNLTMEK
	TLLDIDNTR
	TLLDIDNTRMTLDDFR
	TLNDMRQEYEQLIAK
	YCGQLQMIQEQISNLEAQITDVR
C4LSZ4	VLSGLNPR
C4LSZ3	KQIAGGAYTLSTISGATVR
	QIAGGAYTLSTISGATVR
	TACGIWECKGCGK
	YICPFCCK
C4M4Z9	NIVAVSCLGKPLELWNVDSLEDTTPLVVLDPTNGAIINQAR
C4M4Z8	SEILQSPFNVIK
C4LXJ2	INEPYIPLINAFLK
	LQVMDSIPSK
C4LSZ7	CKPFPTDPIIPYSGAIVAK
	CQVQAQNYPFCTIDPNQAR
	GAAAGEGLGNAFLSHISGVDGIYQVVR
	IVNTGYTTLNLIHFFTAGHDEVK
	STLFNALTK
	TANQSSEPEILAAGALAK
	VAASLQVTDIAGLVK
C4M9J1	AIGLPVLGWGCPDPYACVWDSNENWIK
	YPVLEELHNHNIALTTELAPGSYSYPFVIQLPK
C4LXJ8	LMIEMCKHSFEK
C4M9J7	KDITFEEIIQIEVILDTPNEVLEK
C4LXJ6	STTQELKNAIER
C4M9J5	KDKNTEPLME
C4MAL8	IIVKLPTSLNR
C4M4Y1	AITTLDCQLK
	GHFCVSEAIHK
C4LXK3	TQLTPQQALTFLLDGNNRFVEGK
C4M9K5	SLTLDNFKPQQLVMMK
	SQQPIDQTSFFSK
C4M4Y7	MSHQYNVIDSENQR
C4LSY7	LTQVFGGDR
	VLAPLPQTIPR
C4M9K4	HQLSSLQAKYNATTVQTIPNEIINEK
C4LXK4	EGKGPAITSCCPAWIELVEKEYPDLIPNVSTAR
	GPAITSCCPAWIELVEKEYPDLIPNVSTAR
	GWAKDVGIAVEDLYTVGIMPCIAK
	ISGGSNIFGK
	ISGGSNIFGKTGGVCETVLR
	KGELKVDVVEMMACVGGCLGGAGQPK
	KLVAMIAPSTR
	LGVAEAMGMPIGSTAMAQLVHCLR
	LGVAEAMGMPIGSTAMAQLVHCLRL
	LVAMIAPSTR
	NAGVDWNSCTVNKEETFK
	QQIHQDYDASCTSNEIAAYFKK
	RVMLDILDQQTDIR
	SPIGCLAGCIK
	SPIGCLAGCIKR
	TEDGQCDLPFRR
	TGGVCETVLR
	TGGVCETVLRV
	TGGVCETVLRVIAR
	VLIDESECTGCGQCSLVCNFGSITPIDHLVDTFKAK
	VMLDILDQQTDIR
C4LSY9	KKNLQYYDVSAK
	KLTGNPNLVFVADPR
	KNLQYYDVSAK
	LTGNPNLVFVADPR
	LVIVGDGGTGK
	LVIVGDGGTGKTTFVKR
	MQQPDGIPTFK
	MQQPDGIPTFKLVIVGDGGTGKTTFVKR
	NLQYYDVSAK
	SNYNFERPFLWIAR
	SNYNFERPFLWIARK
	TIQQESIDINDPSIPMNSFNDDVFGNGPI
	VCENIPIVLVGNK
	VCENIPIVLVGNKCDVK
	VCENIPIVLVGNKCDVKDR
C4LXK9	RKVISIDEIR
C4LT02	ALNVDVLK
	ALNVDVLKTNISR
	ALNVDVLKTNISRK
	AQGMVFKEGYMIK
	DESTTVKTEVIPANKQ
	ELSADGYSGVEVR
	ELSADGYSGVEVRK
	FGFPKDKIELYVEK
	FVADGVFYAELNELLQR
	FVADGVFYAELNELLQRELSADGYSGVEVRK
	GLCPVSQAESIK
	GLCPVSQAESIKYK
	HKFVADGVFYAELNELLQR
	IAEGLPVR
	IHELTNLLIAR
	IPDVVEIK
	IPDVVEIKTPK
	IPDVVEIKTPKDESTTVK
	IPDVVEIKTPKDESTTVKTEVIPANKQ
	KNGSKFQIIIR
	LIMDSGAKGCEVSISGK
	RIHELTNLLIAR
	TKALNVDVLK
	TPKDESTTVKTEVIPANKQ
	VTIMLDTDPSGKNGPAAR
Q24809	ALITQPELLILDEATSALDSESEMIVQQAIDKIAK
	CAHIANATNFINSLPQKFDTVLGQR
	FDTVLGQR
	FRYPTRPEQVILDGASFVIPK
	IYANAENLMTEVVENIK
	KSPQDPFSEEGEKNFTIDQVELDNIK
	LLILDEATSALDFKSEK
	MANCHNFICQLPQGYNTIIGER
	MANCHNFICQLPQGYNTIIGERGTSLSGGQK
	NIQEFNLATLR
	SPQDPFSEEGEKNFTIDQVELDNIK
	STIIGLLQR
	STVIQLIER
	SVALVGPSGCGK
	TVAALGIEK
	YPTRPEQVILDGASFVIPK
Q24804	DLYMKTGQGFVLVYSIIAQSTYNDLDPIHDQIVR
	DTEDVPIIVVGNKCDLESQR
	ISDIFTTLIK
	ISDIFTTLIKR
	KQLDLDGQQYVLEILDTAGTEQFTAMRDLYMK
	QLDLDGQQYVLEILDTAGTEQFTAMR
	QLDLDGQQYVLEILDTAGTEQFTAMRDLYMK
	TGQGFVLVYSIIAQSTYNDLDPIHDQIVR
	VRDTEDVPIIVVGNKCDLESQR
	YDPTIEDSYRK
C4LT06	FAFFDSNGK
	KLPILAFFGGLECEQCGTYYQVFDQHPR
B1N4X5	ATPVLDNTVSVSGIDEYSPLAVIDREFIAGKR
	IDCLHPSISTTSISVSSSAVSRPTIAASSK
	IQVNSPSSSFSSPDYIENVK
	KLFFLNNKNLEIFDITK
	LFFLNNKNLEIFDITK
	NLEIFDITK
Q24803	AAIHSNDKAVVEKYALTMK
	AATIAGMAFASAFLGMDHSMAHK
	AAYSSGKPALGVGAGNVPTYIEK
	AAYSSGKPALGVGAGNVPTYIEKTCNIK
	AAYSSGKPALGVGAGNVPTYIEKTCNIKQAANDVVMSK
	ACEELMKATETIT
	ACEELMKATETITGFK
	ADQRYMELAQMVGLK
	ADQRYMELAQMVGLKCNTPAEGVEAFAK
	AENTQDGIDKAEAMVE
	AENTQDGIDKAEAMVEFNGR
	AENTQDGIDKAEAMVEFNGRG
	AENTQDGIDKAEAMVEFNGRGHS
	AFKFPTMGK
	AIADTGLDVLVH
	AIADTGLDVLVHATEAYVS
	AIADTGLDVLVHATEAYVSVM
	AIADTGLDVLVHATEAYVSVMANEYTDGLAR
	AIADTGLDVLVHATEAYVSVMANEYTDGLARE
	AIADTGLDVLVHATEAYVSVMANEYTDGLAREAVK
	AIADTGLDVLVHATEAYVSVMANEYTDGLAREAVKLVFENLLK
	AKLEKFMFGVNAYSADVNNAR
	AQVALKEYLKPEYTQEK
	AQVALKEYLKPEYTQEKIDYIVK
	AQVALKEYLKPEYTQEKIDYIVKK
	ASVAALDQHCALAAAAVEETGR
	ASVAALDQHCALAAAAVEETGRGIFEDK
	ASVAALDQHCALAAAAVEETGRGIFEDKATK
	ATETITGFK
	ATKNIFACEHVTHEMR
	AVCKEVGPNEPLTR
	AVVEKYALTMK
	CNTPAEGVEAFAK
	CNTPAEGVEAFAKACEELMKATETITGFK
	CPGMSPQWFAEQVGIKVPEDCNIICAVCK
	CPGMSPQWFAEQVGIKVPEDCNIICAVCKEVGPNEPLTR
	CVAVLLPHVIR
	CVAVLLPHVIRY
	CVAVLLPHVIRYNGQKPR
	DAAIAAGAPENCIQWIEFGGIEASNK
	DAAIAAGAPENCIQWIEFGGIEASNKLMNHPGVATILATGGNAMVK
	EAVKLVFENLLK
	EAVKLVFENLLKSYNGDLEAR
	EAVKLVFENLLKSYNGDLEAREK
	EKLSPVLAILK
	EKLSPVLAILKAENTQDGIDKAEAMVEFNGR
	EKLSPVLAILKAENTQDGIDKAEAMVEFNGRG
	EVGPNEPLTR
	EVGPNEPLTRE
	EVGPNEPLTREK
	EYLKPEYTQEKIDYIVKK
	FMFGVNAYSADVNNAR
	FMFGVNAYSADVNNARL
	FMFGVNAYSADVNNARLNPK
	GHSAAIHSNDKAVVEKYALTMK
	GIFEDKATK
	GLAVMNTFGPDNIIAIGGGSAMDAAK
	HAKTVGIINVDPLYGITEIAEPVGVVCGVTPVTNPTSTAIFK
	HSAAIHSNDKAVVEKYALTMK
	IADTGLDVLVHATEAYVSVMANEYTDGLAR
	ICIPTTSGTGSEVTPFAVISDHETGK
	IFFEPHSIR
	IFFEPHSIRY
	IMWLLYEHPEADFFAMK
	IMWLLYEHPEADFFAMKQK
	IVRDAAIAAGAPENCIQWIEFGGIEASNK
	KANIDEAAWMSKVPEMALLAFEDQCSPANPR
	KASVAALDQHCALAAAAVEETGR
	KLAMWPK
	KTVGIINVDPLYGITEIAEPVGVVCGVTPVTNPTSTAIFK
	KYPLADYSLTPSVAIVDPMFTMSLPK
	KYPLADYSLTPSVAIVDPMFTMSLPKR
	LAELKELSK
	LAELKELSKIFIVSDR
	LEKFMFGVNAYSADVNNAR
	LGYVDRVMDVLK
	LGYVDRVMDVLKR
	LGYVDRVMDVLKRR
	LICIPTTSGTGSEVTPFAVISDHETGK
	LICIPTTSGTGSEVTPFAVISDHETGKK
	LKCNTPAEGVEAFAK
	LMNHPGVATILATGGNAMVK
	LNPKCPGMSPQWFAEQVGIKVPEDCNIICAVCK
	LSPVLAILK
	LSPVLAILKAENTQDGIDKAEAMVE
	LSPVLAILKAENTQDGIDKAEAMVEFNGR
	LSPVLAILKAENTQDGIDKAEAMVEFNGRG
	LVFENLLK
	LVFENLLKSYNGDLEAR
	LVFENLLKSYNGDLEAREK
	MELAQMVGLKCNTPAEGVEAFAK
	MHNAATIAGMAFASAFLGMDHSMAHK
	MNHPGVATILATGGNAMVK
	NIFACEHVTHE
	NIFACEHVTHEMR
	NIFACEHVTHEMRHAK
	NNLQWFR
	NNLQWFRVPPK
	NPIVFSFHPSALK
	PLYGITEIAEPVGVVCGVTPVTNPTSTAIFK
	PMFTMSLPK
	QAANDVVMSK
	RAIADTGLDVLVH
	RAIADTGLDVLVHA
	RAIADTGLDVLVHATEAYVS
	RAIADTGLDVLVHATEAYVSVM
	RAIADTGLDVLVHATEAYVSVMANEYTDGLAR
	RAIADTGLDVLVHATEAYVSVMANEYTDGLARE
	RAIADTGLDVLVHATEAYVSVMANEYTDGLAREAVK
	SFDNGMICASEQAAIIDKEIYDQVVEEMK
	SNEVEIEIFIDVEPDPSIQTVQK
	SVAALDQHCALAAAAVEETGR
	SYNGDLEAR
	SYNGDLEAREK
	TCNIKQAANDVVMSK
	TLGAYFINEEEK
	TLGAYFINEEEKAK
	TLGAYFINEEEKAKLEK
	TLGAYFINEEEKAKLEKFMFGVNAYSADVNNAR
	TRNPIVFSFHPSALK
	TRNPIVFSFHPSALKCSIMAAK
	TVGIINVDPLYGITE
	TVGIINVDPLYGITEIA
	TVGIINVDPLYGITEIAEPVGVVCGVTPVTNPTSTAIFK
	TVGIINVDPLYGITEIAEPVGVVCGVTPVTNPTSTAIFKS
	TVGIINVDPLYGITEIAEPVGVVCGVTPVTNPTSTAIFKSLISIK
	VGAAFHLPHGR
	VGAAFHLPHGRC
	VMANEYTDGLAR
	VPEDCNIICAVCK
	VPEDCNIICAVCKEVGPNEPLTR
	VPEMALLAFEDQCSPANPR
	VPEMALLAFEDQCSPANPRVPMVK
	VPEMALLAFEDQCSPANPRVPMVKDMEK
	VPMVKDMEK
	VPMVKDMEKILK
	VPPKIFFEPHSIR
	VPPKIFFEPHSIRY
	YLAELKELSK
	YLAELKELSKIFIVSDR
	YMELAQMVGLK
	YMELAQMVGLKCNTPAEGVEAFAK
	YNFYKADQR
	YNFYKADQRY
	YNFYKADQRYMELAQMVGLK
	YPLADYSLTPSVAIVDPMFTMSLPK
	YPLADYSLTPSVAIVDPMFTMSLPKR
C4MAN5	ALQEDVVQELIKDIPLNER
	SRESFIIQFNGASSMIKK
Q24806	AKINITETFQALVK
	INITETFQALVK
	INITETFQALVKDIK
	LVMLGGGAVGK
	NLAEQWKVLFFETSAK
	SGDGYVIVYSITSTTSFLEANGFREQLYR
	TANTYKLVMLGGGAVGK
	VLDKDVSEHVS
	VLDKDVSEHVSIALCGNKCDLESER
	VLFFETSAK
	VSEHVSIALCGNKCDLESER
C4M504	IIDNAVERNYCYRQELCSMFPPLVIESLINK
C4MAN6	ALADAITAVTKK
	CTTETYQLMKK
	DLLDQLEASR
	GTYGQLFECFRK
	HLADPTIVETLIQTVK
	KESEYQHFLMNGLKDSLSMFR
	KLDTAAPVVSDAGKQDLTSMLR
	LSSVSKNTKLQAK
	PTIVETLIQTVK
	QAVQQGTVPKDLLDQLEASR
	QSMINTTWLSPELKEILK
	STNSAGNPPPPPPAR
C4LX05	AHGSINSFSSSPCHIELILTEK
	AKGLNTALLTVSHIAVQEAR
	AQEFLKNVIIKK
	GLNCAFGRWPVK
	GLNTALLTVSHIAVQEAR
	GLNTALLTVSHIAVQEARS
	NTYETADAIR
	NTYETADAIRGMK
C4LX06	ALLLPQPMKDLR
	INYDDMDEEELLKQLAAENEAR
	ISPAELAR
	NTPFVVALNKIDR
	VGCPITLPSRNNMDLGR
	VKTPYIVQDVVCAAQGVK
Q24802	AGMVECLGSPK
	AGMVECLGSPKR
	ALVANTSNMPVAAR
	GDHVSGGDIIGTVPESALVVHK
	GISVASLDHQREWEFTPLVK
	GLMGEIIRLEGTTATIQVYEETAGLQLGDMVER
	GNEMAEVLRDFPALSIK
	HFPAVNWNISFSK
	IGSVSIVGAVSPPGGDFSDPVTTSTLNIVQVFWGLDKK
	IKEILQMEEGLLQIVQLVGQDSLAETDKLTLEIAR
	ILDSLFPCIQGGTCAIPGAFGCGK
	ITSTTPLVTGQR
	KGDHVSGGDIIGTVPESALVVHK
	KPRPTAEKITSTTPLVTGQR
	LAEMPADSGYPAYLAAR
	LAEMPADSGYPAYLAARL
	LASFYER
	MKYEEPSQGEQVINEK
	NIIHFYNEAFQALSVDYEDHKITWATIK
	RIGSVSIVGAVSPPGGDFSDPVTTSTLNIVQVFWGLDKK
	SAMSDLLVR
	SGSIFIPR
	SLDSYYNSKDEEFVPLRDK
	SVSGPVVIAENMLGAAMNELVR
	TALVANTSNMPVAAR
	TALVANTSNMPVAARE
	TMKPLSVELGPGIMTSIFDGIQRPLVSIAEK
	TVISQALSK
	VGDKEESIMTR
	VIKDDFLQQNSYTPYDFSCPFYK
	VYSVSGPVVIAENMLGAAMNELVR
Q24801	AALTADKIATEASFFSFGTNDLTQGTFSYSR
	AALTADKIATEASFFSFGTNDLTQGTFSYSREDSENKFIPK
	AFLEATAEVIK
	AFLEATAEVIKEGIK
	AFLEATAEVIKEGIKTHAEIMIPNVTEVNELINLR
	AFLEATAEVIKEGIKTHAEIMIPNVTEVNELINLRK
	ALEFGAEGIGLCR
	ALEFGAEGIGLCRT
	ALEFGAEGIGLCRTER
	APQSVDQLLHK
	APQSVDQLLHKNMPANYAEAPLVK
	DPGTGENMFFGEYLK
	DPGTGENMFFGEYLKNAQGEDVVAGIR
	DPGTGENMFFGEYLKNAQGEDVVAGIRTPQIISK
	EETKPEDIHGFFVAEGILTCR
	EFKITPEQADGTAVSVVSMVYGNMGNDSATGVCFTR
	EGIKTHAEIMIPNVTEVNELINLR
	EGIKTHAEIMIPNVTEVNELINLRK
	EGLAEKEVVLKK
	ELMEVNPMIGHR
	ELMEVNPMIGHRG
	ERMFNAVERLPIVVK
	GAAMSMPGMMDTILNLGLNDKTVVALAK
	GEVPLEEPQVGSGYFGTILK
	GEVPLEEPQVGSGYFGTILKWANEIKK
	GIRLGTTNPEIYEMQIR
	GLPASPGAATGAVVFDADDAVEQAK
	GLPASPGAATGAVVFDADDAVEQAKGK
	GLPASPGAATGAVVFDADDAVEQAKGKK
	GMGKPCVSGAEGIK
	GMGKPCVSGAEGIKVDVAK
	GMGKPCVSGAEGIKVDVAKK
	GRQTRPELLVGICGEHG
	GTTNPEIYEMQIR
	GVKLDTELDANDMKELAQVFIK
	GVKLDTELDANDMKELAQVFIKK
	IAAAQAQIR
	IAAAQAQIRHPREN
	IALNVDDEVYDK
	IALNVDDEVYDKTLENK
	IALNVDDEVYDKTLENKK
	IALNVDDEVYDKTLENKKVEK
	IAPQSVDQLLHK
	IAPQSVDQLLHKN
	IAPQSVDQLLHKNMPANYAEAPLVK
	IGLPVPQGFVITTEMCK
	IGSLEVHEGDILTIDGSTGCVYK
	IGSLEVHEGDILTIDGSTGCVYKGEVPLEEPQVGSGYFGTILK
	IGVFANADLPSAAK
	IGVFANADLPSAAKK
	IGVFANADLPSAAKKALEFGAEGIGLCR
	ILPANPFEILDRPGVGEVMR
	IPNVTEVNELINLRK
	IRLGTTNPEIYEMQIR
	KALEFGAEGIGLCR
	KALEFGAEGIGLCRTER
	KIGVFANADLPSAAK
	KIGVFANADLPSAAKK
	KKLEGYFHEVQDFEFTIER
	KKYLNELMPLQK
	KKYLNELMPLQKQDFIGLLK
	KLEGYFHEVQDFEFTIER
	KLLGGKGAGLCTMTK
	KLYMLQTR
	KNVLEPVHEEVEKK
	KSGKVFGGEENPLLVSVR
	KSGKVFGGEENPLLVSVRS
	KTEEFTKQPFPVDPYAQLEFAICAVFR
	KTEEFTKQPFPVDPYAQLEFAICAVFRS
	KVKELMEVNPMIGHR
	KYGIKVPFMYGTMVECVR
	LDPPLHEFLPTLEELMR
	LDTELDANDMKELAQVFIK
	LDTELDANDMKELAQVFIKK
	LGTTNPEIYEMQIR
	LLDPPLHEFLPTLEELMR
	LLGGKGAGLCTMTK
	LSGKTEGLAEKEVVLK
	LSGKTEGLAEKEVVLKK
	LTNNERFAYDSYR
	LYMLQTR
	MAEDADLPGCYEQLLDIR
	MAEDADLPGCYEQLLDIRK
	MAEDADLPGCYEQLLDIRKK
	MFNAVERLPIVVK
	MFNAVERLPIVVKMILSNTLEER
	MGKPCVSGAEGIKVDVAK
	MILSNTLEER
	MILSNTLEERKK
	MNATATVRTGVDMVEEGLITKEQAIMR
	MPEGLMEEVKK
	MQRVYAFEDGDGTNKK
	NAQGEDVVAGIR
	NAQGEDVVAGIRTPQIISK
	NMPANYAEAPLVK
	NMPANYAEAPLVKGLPASPGAATGAVVFDADDAVEQAK
	NMPANYAEAPLVKGLPASPGAATGAVVFDADDAVEQAKGK
	NMQLVEKKSGKVFGGEENPLLVSVRS
	NVLEPVHEEVEK
	NVLEPVHEEVEKK
	NVLEPVHEEVEKKYGIK
	NVLEPVHEEVEKKYGIKVPFMYGTMVECVR
	PGTGENMFFGEYLK
	PPLHEFLPTLEELMR
	QDFIGLLK
	QDFIGLLKT
	QDFIGLLKTMNGLPVTVR
	QFIANGNKMPEGLMEEVKK
	QPFPVDPYAQLEFAICAVFR
	QPFPVDPYAQLEFAICAVFRS
	RIAPQSVDQLLHK
	SGAAMSMPGMMDTILNLGLNDKTVVA
	SGAAMSMPGMMDTILNLGLNDKTVVALAK
	SGAAMSMPGMMDTILNLGLNDKTVVALAKLTNNER
	SGKVFGGEENPLLVSVR
	SGKVFGGEENPLLVSVRS
	SGYFGTILK
	SGYFGTILKWANEIKK
	SGYFGTILKWANEIKKIGVFANADLPSAAK
	TEEFTKQPFPVDPYAQLEFAICAVFR
	TEEFTKQPFPVDPYAQLEFAICAVFRS
	TEGLAEKEVVLK
	TEGLAEKEVVLKK
	TGVDMVEEGLITK
	TGVDMVEEGLITKEQAIMR
	TGVDMVEEGLITKEQAIMRI
	THAEIMIPNVTEVNELINLR
	THAEIMIPNVTEVNELINLRK
	TMNGLPVTVR
	VFGGEENPLLVSVR
	VFGGEENPLLVSVRS
	VKELMEVNPMIGHR
	VKELMEVNPMIGHRG
	VLLLREETKPEDIHGFFVAEGILTCR
	VLLLREETKPEDIHGFFVAEGILTCRG
	VLLLREETKPEDIHGFFVAEGILTCRGGK
	VPFMYGTMVECVR
	VYAFEDGDGTNK
	VYAFEDGDGTNKK
	VYAFEDGDGTNKKLLGGK
	YGIKVPFMYGTMVECVR
	YLNELMPLQK
	YLNELMPLQKQDFIGLLK
	YLNELMPLQKQDFIGLLKTMNGLPVTVR
	YVELKILPANPFEILDRPGVGEVMR
C4M904	SLTAMVRNILDPCRMISIWFLSVLMYYIFNK
C4M907	LFETGGEVPATK
	SEVDHYLETLFAGK
Q9NJW1	AKFPGGIKVDDK
	AKFPGGIKVDDKTIK
	AKFPGGIKVDDKTIKR
	ALPMLGFNCNK
	ALPMLGFNCNKR
	DADKSGSLDVNELIK
	DKSGTLEIGELK
	DKSGTLEIGELKK
	DLQNLQSWFISVDK
	DLQNLQSWFISVDKDK
	DLQNLQSWFISVDKDKSGTLEIGELK
	EEIDNAEFDKFVNLVLALSG
	FPGGIKVDDKTIK
	FPGGIKVDDKTIKR
	FQWWFPLVER
	FQWWFPLVERLDAK
	FVNLVLALSG
	HFDADKSGSLDVNELIK
	KAKFPGGIKVDDK
	KSGSLDVNELIK
	KSGTLEIGELKK
	KVSKNQFISTAAYLGQCR
	LDAKDLQNLQSWFISVDK
	LDAKDLQNLQSWFISVDKD
	LDAKDLQNLQSWFISVDKDK
	LDAKDLQNLQSWFISVDKDKSGTLEIGELK
	LDAKDLQNLQSWFISVDKDKSGTLEIGELKK
	NQFISTAAYLGQCR
	NQFISTAAYLGQCRS
	REEIDNAEFDKFVNLVLALSG
	SGSLDVNELIK
	SGSLDVNELIKALPMLGFNCNKR
	SGTLEIGELK
	SGTLEIGELKK
	SLFAIQAAADAFVTQMIQAAVNSDPNLK
	SLGSKKVSKNQFISTAAYLGQCRSIYQK
	SVDVLLK
	SVDVLLKM
	SVDVLLKMNGSSLGSK
	SVDVLLKMNGSSLGSKK
	TFNMKREEIDNAEFDKFVN
	TFNMKREEIDNAEFDKFVNLVLALSG
	VSKNQFISTAAYLGQCR
	VSKNQFISTAAYLGQCRS
C4LX08	IGYYVNNEFEGIDPTIDVVKR
K22E_HUMAN	AAFGGSGGRGSSSGGGYSSGSSSYGSGGR
	AQYEEIAQR
	DVDNAYMIK
	FASFIDKVR
	FGGFGGPGGVGGLGGPGGFGPGGYPGGIHEVSVNQSLLQPLNVK
	FLEQQNQVLQTK
	GFSSGSAVVSGGSR
	GGGFGGGSGFGGGSGFGGGSGFSGGGFGGGGFGGGR
	HGDSLKEIKIEISELNR
	HGGGGGGFGGGGFGSR
	IEISELNR
	LALDVEIATYR
	LALDVEIATYRK
	LLEGEECR
	LLRDYQELMNVK
	LNDLEEALQQAKEDLAR
	NKLNDLEEALQQAKEDLAR
	NLDLDSIIAEVK
	NLDLDSIIAEVKAQYEEIAQR
	NVQDAIADAEQR
	NVQDAIADAEQRGEHALKDAR
	RSTSSFSCLSR
	SISISVAGGGGGFGAAGGFGGR
	SKEEAEALYHSKYEELQVTVGR
	SLVGLGGTK
	STSSFSCLSR
	TAAENDFVTLK
	TAAENDFVTLKK
	TLNNKFASFIDKVR
	TSQNSELNNMQDLVEDYKK
	VDLLNQEIEFLK
	VELQSKVDLLNQEIEFLK
	VLYDAEISQIHQSVTDTNVILSMDNSR
	WELLQQMNVGTRPINLEPIFQGYIDSLKR
	YLDGLTAER
C4M913	KAINRYIPPDFDPEIHK
C4M8P0	ACGVSRDVIAVAIINDKGK
	DCNSKIFPLAEKELQNKLIEFVQQAQQNGFVK
	DVIAVAIINDKGK
	IFPLAEKELQNKLIEFVQQAQQNGFVK
	LIEFVQQAQQNGFVK
	LIEFVQQAQQNGFVKK
	SAPSVETMKDEIEK
	TDCNSKIFPLAEKELQNK
	TDCNSKIFPLAEKELQNKLIEFVQQAQQNGFVK
C4LSN8	EFIPVEDVKLVSVFVK
C4M021	AGEDELIR
	AGEDELIREYMEDPTK
	LISLGADITIKNDKGETPFMVAK
	NDKGETPFMVAK
C4M023	AFLEGLSSKTQIESK
	KLDGCTGCYACSPK
	LDGCTGCYACSPK
	LFVCISNSAEEGKSICER
	YQGVYLSGTQREENKNQSR
C4MB02	TVENFTQDLQSK
	TVENFTQDLQSKIMNETYYVDK
C4LSP0	DIPIPLVSAGADKGNLREYVQR
	EVGIAALQGKPGKK
	QVDIIAAIPDSHRPFLLPIVK
	SLNEDHPQLQDIR
	SLNEDHPQLQDIRR
	YTSEETIDVLSR
C4M4P0	SSTLKTSASLLR
C4M512	IIPIYVVPK
	INVIDKNTNPYAK
C4M4P4	AALKEDALQFAYYR
	AALKEDALQFAYYRT
	AVMSILKGDVK
	FVFISWAGEGIK
	FVFISWAGEGIKKPK
	GDVKNVINNFHIELHATSLDDLVEDEIAAK
	GGLEEVKAALKEDALQFAYYR
	GKGGLEEVKAALKEDALQFAYYR
	GKGGLEEVKAALKEDALQFAYYRT
	GVQTQPNKLVVDAK
	GVQTQPNKLVVDAKGK
	IKKAGGADYSFNTTSN
	KAGGADYSFNTTSN
	NVINNFHIELHATSLDDLVEDEIAAK
	NVINNFHIELHATSLDDLVEDEIAAKIK
	SGFDLSEVAGPVAEVIDDKNEEVEFVVFGVQTQPNK
	SGFDLSEVAGPVAEVIDDKNEEVEFVVFGVQTQPNKLVVDAK
	SGFDLSEVAGPVAEVIDDKNEEVEFVVFGVQTQPNKLVVDAKGK
	TSLDDLVEDEIAAK
	VKFVFISWAGEGIK
	VKFVFISWAGEGIKKPK
	VMSILKGDVK
	VMSILKGDVKNVINNFHIELHATSLDDLVEDEIAAK
C4M515	EASLDPLILYSEPKK
	FTMNEQTPKQWEYTAYCLSLLSYNEK
C4M4P7	AGCYAVSWNPVQSQIVSGHANK
	KVISSFSHPDFTVTSSSR
	NIHTSSVSDIINVLDGR
C4LT17	AHIGEIQASVWNHETKEQLAQHNIFLL
	EQLAQHNIFLL
	FMFHQMLLKGELPLSIGGGIGQSR
	FMFHQMLLKGELPLSIGGGIGQSRL
	GELPLSIGGGIGQSR
	GMNNSVVEVVHSLAK
	IKQEFEKNLTYDLDLLR
	IYKTEEYICNEYSQLKR
	KYGAVCVIGIGYPLPLSK
	LCMFYLQK
	NATDREKFMFHQMLLKGELPLSIGGGIGQSRL
	NLTYDLDLLR
	TTIFPENYFPLLNSFQTEIAIR
	TTIFPENYFPLLNSFQTEIAIRK
	YGAVCVIGIGYPLPLSK
P36185	DNGNNGCNGGLGSNVYDYIIEHGVAK
	DNGNNGCNGGLGSNVYDYIIEHGVAKESDYPYTGSDSTCK
	EGKVTPLRDQAQCGSCYTFGSLAALEGR
	ESDYPYTGSDSTCK
	ESDYPYTGSDSTCKTNVK
	FVDSFNK
	FVDSFNKIGSFK
	NNYFALNHEVCAVGYGVVDGKECWIVR
	VTPLRDQAQCGSCYTFGSLAALEGR
	YLNIQAPESVDWR
	YLNIQAPESVDWRK
	YLNIQAPESVDWRKEGK
Q24813	AQCMDALSSQNNLAGYR
	AQHVVASLAEELIK
	ASDFTIKLEEPIVR
	ASDFTIKLEEPIVRQ
	CVIEASINKFGR
	EANTIQTPELAK
	FGYANAASQR
	GFEELNEEIKK
	GINVISMDCVPR
	GYGIYVESGAGLLSSCTDEDYRSVGCR
	IAETTEELYEK
	IAETTEELYEKSNIICK
	IGSVIVDLAAANGGNCEVTR
	ITIIGQTDYTVK
	KASDFTIKLEEPIVR
	KGFEELNEEIKK
	KLTNNSTTTNGEVNYSEK
	KSPILITQDMVDSMK
	KVENINTLSTEEENKK
	LIDAEYALFR
	LIDAEYALFRQ
	LIDAEYALFRQLLPETDIVITTANVPGK
	LIDAEYALFRQLLPETDIVITTANVPGKK
	LLDLSVQK
	LLDLSVQKGINVISMDCVPR
	LLMGQVTAAGK
	LPGHMNVLLAEANVPYK
	LSKAQCMDALSSQNNLAGYR
	LTNNSTTTNGEVNYSEK
	MRQGQTLISFFYPAK
	MVAMVPSVCK
	MWPAPQIQVVSQNTPAK
	NQEDEGPKEANTIQTPELAK
	QGQTLISFFYPAK
	QGQTLISFFYPAKNSK
	QLLPETDIVITTANVPGK
	QLLPETDIVITTANVPGKK
	SFMSVIFGGFGATPSK
	SGETYLYDNR
	SGETYLYDNRITIIGQTDYTVK
	SPILITQDMVDSMK
	SRGYGIYVESGAGLLSSCTDEDYRSVGCR
	TGLLSQEKEEIPTK
	TGLLSQEKEEIPTKVLAEDLFIGIPK
	TGLLSQEKEEIPTKVLAEDLFIGIPKENVPEK
	VENINTLSTEEENKK
	VLAEDLFIGIPK
	VLAEDLFIGIPKENVPEK
	VNPPSEEEINKMR
C4M8N5	ESIIITNSK
	ESIIITNSKSPDGQSITFQVIEFGK
	SPDGQSITFQVIEFGK
C4LWN6	FIAIINTLEHFSTVDAFVR
	FLDAALQDPESVVR
	KAAIDCWDVIAIIVREYAMTLDNPSYVPK
	LLLQNGTPIIK
	LPQSTLNGEVFR
	LTTNISQEDFDSDVLPTIK
	MNFFKNIFSDPSQVTK
	NIFSDPSQVTK
	SMAPEATGSTKDAAVR
	SMAPEATGSTKDAAVRS
C4LWN9	NTNNEITGYCIK
	SINDYDYDYEIK
	YSVSSECAIESEENQIGLVNECHNYK
C4M038	KIQFHQLLELTSVKDIEDSDISQNGFQLK
C4LX00	ALMSIIVPDGEQLKEK
	NAVPITESANILFLLNYLSHGVVR
	NVHTPDETMDIESGNKLLDLICTLLSELV
	SSNNDYLKDITECIEEIAK
C4M508	KQLPVNQKEQIEELLNEETTLINVPK
	QLPVNQKEQIEELLNEETTLINVPK
C4M030	ATLINLCK
	ATLINLCKAFAGESQAR
	EGLDVIAQLFNETANQEGTHAR
	EGQETPKIETAVPIDFGTTADNLLAAIAGETYEHETMYPEFAK
	IETAVPIDFGTTADNLLAAIAGETYEHETMYPEFAK
	ILDELKANSLYK
	ILFEMIQSLKK
	ILFEMIQSLKKEGQETPK
	KEGLDVIAQLFNETANQEGTHAR
	LNLIAKAELNHHNNYQK
	TAKKEGLDVIAQLFNETANQEGTHAR
	VCPLCGEPGDFFR
C4M031	RLSRTFSTTITWNGQESNLDEIYYK
C4M032	AGDGVVDLSLISDLHKAEVYR
	GNAFSDGQLRS
	ILCLAQPIHSTASIQNK
	MDITKFPLPQGLK
	MDITKFPLPQGLKVQLDKIR
	SFISALDETSLK
	SFISALDETSLKQFNEWSEVVQK
	TIDQTTIFDNLHSLVENSVGLK
	TIDQTTIFDNLHSLVENSVGLKGNAFSDGQLR
C4M036	EMFFFDVFPLATK
	GMFVLPFEIPK
	LGFEHPKGMFVLPFEIPK
	SFEEEGLKEFKGK
	TALITLAGGQGSR
	VSIFEIQR
C4MB19	GPALFKEYFNRPEETKNSFTEDGWFK
	IKNFYLVEDEWSAENGILTAALK
	LIDVEDMGYTTDKEIPQGELLLR
	SIKLEDVFKNSEFHDIVMK
	SLREVDSSLSSHEK
	TGDIAQITPSGR
C4LSM1	IKMVATDPTGAEISCYDAK
	KTYPFTLTSCAK
	MVATDPTGAEISCYDAK
	MVATDPTGAEISCYDAKFSLSTK
	NVGSCTYNNICELFANVTDECLNATR
	SHGFDKVPCSCPIPVSR
	YTASIPIPPLDIPDGIEWLASGNYK
C4LSM2	GNAEHSGVYPCQCSALR
	GNAEHSGVYPCQCSALRK
	GRPCKVFEMSTSK
	GVYPCQCSALR
	GVYPCQCSALRK
	LDDSCPSTHNVEVPEVK
	LDDSCPSTHNVEVPEVKR
	RLDDSCPSTHNVEVPEVK
	RLDDSCPSTHNVEVPEVKR
	TEYSLVGINDGYASLLLESGETRDDLKLPEGEMGQK
	VFEMSTSK
	VTYAGYDIFTGK
	VTYAGYDIFTGKR
C4MAP6	LLHTEGYLIFNTDMFRK
C4LWM9	VFSIDQIHPQFK
C4M8M9	SINQFKEVSLPYGSDAAVFKK
C4MB14	AANILVSDDGVCK
	AANILVSDDGVCKLADFGVSTK
	AFNDFIALCCVK
	AIFLIPNRPPPTLSTPEEVSK
	INWVAECSKDFEVVEK
	ITDLIEKENEVIAEFGSR
	LADFGVSTK
	TTPTKLQVSQMQK
C4M8M7	AISLKIDAISSPQYENQPAYEFGK
	ALGIVLAQTFGIR
	ASNVIEEWDKVTMEYINR
	CAGLVEGYLTSHR
	DAPHINTYEDFKK
	DLSLSDPWGR
	ECIPSPTNPTILHCPSNFGGLDSK
	EPGLDMTETDIFILNSDGDLSDLQNIAA
	NFIRENSGTYNNQYIIIDYNK
	NGYIPSVNAPFFNDVYK
	YDLRPKECIPSPTNPTILHCPSNFGGLDSK
	YNGYPNDPLVNDPGQFILSR
C4M8M8	IYASAAGGSNVSVK
	IYASAAGGSNVSVKKQPK
	KVQNSYASTSSNVDWNKYK
	KVQNSYASTSSNVDWNKYKNAK
	LTQYSNASAIGSEEFFGKEEKK
	MADSIANGAVK
	MADSIANGAVKLATK
	SISSDQLFGSDEPTAYEK
	SISSDQLFGSDEPTAYEKQK
	TTNKAGWCFEDFEGSGSIKPK
C4MAP0	MFSNYSLADDWVEPLSSALNVPLDQVK
	YFSNAVLAAPICFGLR
C4LWN1	IIVSGSSLLFSNIAFDSVIEHPSLNLIK
	IQNILFSGIGLYLPPSPFTSSLLK
	LLDPVIVK
	NGDEVEIINK
C4M8N0	DCSIIMNKQGFEEPTGYAK
	INLDKSFLQSK
	INNEQKFNSWEIYR
	TTNVDGLFER
C4M007	KMKNNTLSYYTLQMAK
	KQDTETVPQDVVATDVVEEK
C4M4L8	ELDSLLNDEMLQNTPFLILGNKIDIPGAVSEAQLR
	FNTYDLGGHTPAR
	GNVTCEGIRPIEVFMSSIVNR
	IDIPGAVSEAQLR
	KELDSLLNDEMLQNTPFLILGNKIDIPGAVSEAQLR
	MLFLGLDNAGK
	QGYPEGFKWISQYMK
	TTLLHLLKDGK
	VSQHIPTQQPTMEELVMGNIK
C4M4L6	ITPEQEEIIDELKGEQKR
	QVDAIADEEQPSSTALIQQQPGQK
	VGHVSDELNGNFFGR
C4LSN2	EIQAGSEILIASGRPLK
	MNAIKPK
	TVIPIVESVGCSPITVLTSNGNLTVRIPERK
	TVQEDGVAYALEWINSALDNSDK
C4LSN4	ILMETGESGTK
C4MB25	ITWRHQIMLWYAGLR
C4M8L9	CVCHFMTPIPFFNIMCSDEIEPR
	IYDQFGLDLTEEIKQAMIK
	LNISEMIIGQITNDGKDMNK
	SGSTFTHTMLGCDPHSKK
C4MB21	CAKYLMDAGY
	GAEGISIYK
	GAEGISIYKTK
	GAEGISIYKTKQAVIIGYFSDASVSAGQNSDATYK
	ITRVDADEGTAMGK
	KGAEGISIYK
	KGAEGISIYKTK
	KYMITRVDADEGTAMGK
	KYMITRVDADEGTAMGKK
	QAVIIGYFSDASVSAGQNSDATYK
	QAVIIGYFSDASVSAGQNSDATYKCAK
	SWQSYVDSFLVGAGK
	TACASNIAGLQQTGVVIGGK
	TKQAVIIGYFSDASVSAGQNSDATYK
	TKQAVIIGYFSDASVSAGQNSDATYKCAK
	VDADEGTAMGK
	VDADEGTAMGKKGAEGISIYK
	YFSDASVSAGQNSDATYKCAK
	YMITRVDADEGTAMGK
	YMITRVDADEGTAMGKK
C4MB22	GIKVNDMGTYSTERCDYPDFAEK
	GILVCGSGIGISIAANKINGVR
	HNDANIIAFGAR
	MEVIIGSDHAGFPLKEIVK
	RHNDANIIAFGAR
	VIGSDIATDMVDVFLSTPFDGMQHTAR
	VIGSDIATDMVDVFLSTPFDGMQHTARVEK
	VNDMGTYSTER
Q24835	AKKECPATCVGSYECR
	AMTGECDGTTYLCK
	ANCEADQKPSSDGYCWSYTCDQTTGFCK
	ANCEADQKPSSDGYCWSYTCDQTTGFCKK
	ATVQPTPACSVCESGK
	ATVQPTPACSVCESGKFVEK
	CDRDKCSGFCDAMNR
	CKNNNCIIDPNFDCQPIECK
	CNLNTGMCENR
	CSGFCDAMNR
	CSSLTCPADTTYR
	CSSLTCPADTTYRT
	CSSLTCPADTTYRTYTYDSK
	CSSLTCPADTTYRTYTYDSKTGTCK
	CTVQEKVCVK
	CVENSDKSYSCVFNKDVSSTSDNDICAK
	DCVNEQCIPR
	DKLNEFSADIDYYDLGIMSR
	EADKEAYCTYEITTR
	ECKTCSLIETR
	ECPATCVGSYECRDLEGCVVK
	EKVQEVDLCAEETK
	EKVQEVDLCAEETKNGGVPFK
	EYAYPIEK
	EYAYPIEKYEVDWDNVPVDEQRIESVDINGK
	FVQLTDDPSLDSEHFR
	FVQLTDDPSLDSEHFRTK
	GENMCTGKTNNCQEYVCDEKQR
	GSDGKITHKWEIDTER
	HFVWTTCTTTDGNKECYK
	IESVDINGK
	IESVDINGKTCFK
	IQEIVITEKDGIK
	KAFIEGKEGIEQVECASTVCQNDNSCPIITDVEK
[truncated: 13,965 more rows]

## Sheet: Trophozoites Proteins
Protein Name	Entry name	Protein name	Gene name	Peptides Trophozoites	Peptides-Hits Trophozoites	Parsimony Type	Cluster	Equiv. Proteins
S0AUW6	S0AUW6_ENTHI	Actin		97	645	DIFFERENTIABLE	123
S0AWJ4	S0AWJ4_ENTHI	Actin, putative		100	645	DIFFERENTIABLE	123
S0AWF4	S0AWF4_ENTHI	Actin		96	640	DIFFERENTIABLE	123
S0AWZ1	S0AWZ1_ENTHI	Actin		100	639	DIFFERENTIABLE	123
S0AWJ9	S0AWJ9_ENTHI	Actin, putative		94	635	DIFFERENTIABLE	123
S0AUT4	S0AUT4_ENTHI	Actin, putative		97	626	DIFFERENTIABLE	123
S0AUS7	S0AUS7_ENTHI	Actin, putative		95	616	DIFFERENTIABLE	123
S0AVA7	S0AVA7_ENTHI	Actin, putative		94	608	DIFFERENTIABLE	123
S0AWA2	S0AWA2_ENTHI	Actin, putative		91	605	DIFFERENTIABLE	123
S0AXB5	S0AXB5_ENTHI	Actin, putative		83	596	DIFFERENTIABLE	123
S0AV75	S0AV75_ENTHI	Actin, putative		92	586	DIFFERENTIABLE	123
Q9TYD6	Q9TYD6_ENTHI	Actin		96	583	DIFFERENTIABLE	123
S0AUR6	S0AUR6_ENTHI	Actin, putative		90	583	DIFFERENTIABLE	123
S0AV23	S0AV23_ENTHI	Actin, putative		87	579	DIFFERENTIABLE	123
S0AVQ9	S0AVQ9_ENTHI	Actin, putative		90	568	DIFFERENTIABLE	123
S0AWT4	S0AWT4_ENTHI	Actin, putative		74	536	DIFFERENTIABLE	123
Q24801	Q24801_ENTHI	Pyruvate phosphate dikinase	EHI_009530	113	517	DIFFERENTIABLE	127
B1N621	B1N621_ENTHI	Actin, putative	EHI_043640	79	487	DIFFERENTIABLE	123
C4LTX6	C4LTX6_ENTHI	Pyruvate:ferredoxin oxidoreductase	EHI_051060	133	487	DIFFERENTIABLE	22
S0AW09	S0AW09_ENTHI	Actin, putative		86	478	DIFFERENTIABLE	123
S0AV15	S0AV15_ENTHI	Actin, putative		75	444	DIFFERENTIABLE	123
C4M2R2	C4M2R2_ENTHI	Alcohol dehydrogenase, putative	EHI_160940	119	438	DIFFERENTIABLE	54
S0AVT2	S0AVT2_ENTHI	Actin, putative		66	421	DIFFERENTIABLE	123
Q24803	ADH2_ENTHI	Aldehyde-alcohol dehydrogenase 2	ADH2	114	393	DIFFERENTIABLE	54
C4LXE8	C4LXE8_ENTHI	Enolase, putative	EHI_130700	63	373	SUPERSET	9	P51555, S0AWN3
S0AW06	S0AW06_ENTHI	Enolase, putative		61	367	DIFFERENTIABLE	9
B1N387	B1N387_ENTHI	Aldehyde-alcohol dehydrogenase 2, putative	EHI_024240	100	352	DIFFERENTIABLE	54
Q24860	Q24860_ENTHI	Pyruvate oxidoreductase		97	343	DIFFERENTIABLE	22
C4LVR9	C4LVR9_ENTHI	Glyceraldehyde-3-phosphate dehydrogenase, putative	EHI_187020	71	333	SUPERSET	80
S0AX11	S0AX11_ENTHI	Glyceraldehyde-3-phosphate dehydrogenase, putative		69	330	DIFFERENTIABLE	80
S0AYM0	S0AYM0_ENTHI	Actin, putative		80	316	DIFFERENTIABLE	123
S0B0T0	S0B0T0_ENTHI	Actin, putative		73	282	DIFFERENTIABLE	123
S0B1Y3	S0B1Y3_ENTHI	Actin		73	276	DIFFERENTIABLE	123
C4LU72	C4LU72_ENTHI	Myosin heavy chain	EHI_110180	100	226	DIFFERENTIABLE	61
C4LUV9	C4LUV9_ENTHI	Acetyl-CoA synthetase, putative	EHI_178960	61	208	DIFFERENTIABLE	60
Q07569	Q07569_ENTHI	Myosin heavy chain	mhcA	83	197	DIFFERENTIABLE	61
B1N306	B1N306_ENTHI	Elongation factor 2	EHI_166810	69	195	SUPERSET	120	C4M4N3
B1N2J0	B1N2J0_ENTHI	Malic enzyme, putative	EHI_050330	52	185	DIFFERENTIABLE	30
G5EKL5	G5EKL5_ENTHI	Malic enzyme	ME	48	174	DIFFERENTIABLE	30
C4LY85	C4LY85_ENTHI	Ubiquitin, putative	EHI_166800	11	173	SUPERSET	33	C4M760
S0AW44	S0AW44_ENTHI	Malic enzyme, putative		46	172	DIFFERENTIABLE	30
C4M192	C4M192_ENTHI	Phosphoglycerate kinase	EHI_188180	37	167	SUPERSET	318
C4M1E4	C4M1E4_ENTHI	Putative uncharacterized protein	EHI_030750	68	165	DIFFERENTIABLE	16
Q964D2	Q964D2_ENTHI	Gal/GalNAc lectin Igl1	igl1	42	161	DIFFERENTIABLE	71
C4LWQ8	C4LWQ8_ENTHI	Putative uncharacterized protein	EHI_198620	65	160	DIFFERENTIABLE	16
C4LY96	C4LY96_ENTHI	Putative uncharacterized protein	EHI_166920	69	159	DIFFERENTIABLE	16
S0AZU7	S0AZU7_ENTHI	Phosphoglycerate kinase		33	156	DIFFERENTIABLE	318
S0AWG4	S0AWG4_ENTHI	Elongation factor 1-alpha		38	150	DIFFERENTIABLE	36
C4M3S5	C4M3S5_ENTHI	Heat shock protein 70, putative	EHI_052860	45	150	DIFFERENTIABLE	17
C4M6Z7	C4M6Z7_ENTHI	Triosephosphate isomerase	EHI_056480	39	140	SUPERSET	53
C4LWS2	C4LWS2_ENTHI	Alcohol dehydrogenase 3, putative	EHI_198760	40	138	SUPERSET	142	Q24857
O15593	O15593_ENTHI	Actin		23	136	DIFFERENTIABLE	123
C4LXD7	C4LXD7_ENTHI	Fructose-1,6-bisphosphate aldolase, putative	EHI_098570	45	133	SUPERSET	3
S0AW68	S0AW68_ENTHI	Alcohol dehydrogenase 3, putative		38	126	DIFFERENTIABLE	142
C4LVY0	C4LVY0_ENTHI	Alcohol dehydrogenase, putative	EHI_125950	38	123	SUPERSET	485	S0AVS6, S0AX09, S0B069, S0B0T1
S0AWM3	S0AWM3_ENTHI	Alcohol dehydrogenase, putative		38	123	DIFFERENTIABLE	485
S0AXA4	S0AXA4_ENTHI	Elongation factor 1-alpha		28	123	SUPERSET	36
C4M6L0	C4M6L0_ENTHI	Gal/GalNAc lectin subunit Igl2	EHI_065330	36	123	DIFFERENTIABLE	71
S0AYR1	S0AYR1_ENTHI	Alcohol dehydrogenase 3, putative		37	121	DIFFERENTIABLE	142
S0AW50	S0AW50_ENTHI	Alcohol dehydrogenase 3, putative		37	121	DIFFERENTIABLE	142
S0B0R7	S0B0R7_ENTHI	Elongation factor 1-alpha		33	117	DIFFERENTIABLE	36
C4M3Q0	C4M3Q0_ENTHI	Peroxiredoxin	EHI_145840	31	98	DIFFERENTIABLE	280
C4LZN0	C4LZN0_ENTHI	Aspartyl-tRNA synthetase, putative	EHI_175050	39	96	DISCRETE	100
C4LVG4	C4LVG4_ENTHI	Actophorin, putative	EHI_197480	28	95	DISCRETE	281
C4MB38	C4MB38_ENTHI	Protein disulfide isomerase, putative	EHI_071590	29	93	EQUIVALENT	442	Q5XWD1
Q24835	Q24835_ENTHI	Galactose-specific adhesin 170kD subunit	hgl3	35	91	DIFFERENTIABLE	24
B1N3C7	B1N3C7_ENTHI	Galactose-inhibitable lectin 170 kDa subunit, putative	EHI_133900	33	90	SUPERSET	24	P32022
Q9NJW1	Q9NJW1_ENTHI	Grainin 2	grainin 2	24	90	SUPERSET	140
B1N5A8	B1N5A8_ENTHI	Peroxiredoxin	EHI_123390	26	90	SUPERSET	280
O15729	O15729_ENTHI	Peptidyl-prolyl cis-trans isomerase	CYP1	16	89	DISCRETE	308
B1N2F9	B1N2F9_ENTHI	Type A flavoprotein, putative	EHI_152650	27	83	SUPERSET	372	S0AWK7, S0B0Z9
C4LUM3	C4LUM3_ENTHI	NADP-dependent alcohol dehydrogenase	EHI_023110	21	82	SUPERSET	241	S0AXP2, S0AYE8
C4LTM0	C4LTM0_ENTHI	Gal/GalNAc lectin heavy subunit	EHI_012270	29	81	DIFFERENTIABLE	24
C4M213	C4M213_ENTHI	Malate dehydrogenase, putative	EHI_165350	26	81	SUPERSET	471	S0AXV8
C4LTW4	C4LTW4_ENTHI	2,3-bisphosphoglycerate-independent phosphoglycerate mutase, putative	EHI_050940	26	75	DIFFERENTIABLE	327
C4LZ72	C4LZ72_ENTHI	Filamin 2, putative	EHI_104630	33	70	DIFFERENTIABLE	224
B1N486	B1N486_ENTHI	Heat shock protein 70, putative	EHI_188610	21	69	SUPERSET	17	C4LZ45, C4M1G4, C4M9V9
C4M6H3	C4M6H3_ENTHI	NAD(FAD)-dependent dehydrogenase, putative	EHI_099700	30	67	DIFFERENTIABLE	293
C4M4P4	C4M4P4_ENTHI	Actin-binding protein, cofilin/tropomyosin family	EHI_168340	18	66	DISCRETE	398
Q869B1	Q869B1_ENTHI	Fe-hydrogenase, putative	EHI_005060	25	66	DISCRETE	314
C4LWU6	C4LWU6_ENTHI	Calponin homology domain protein, putative	EHI_199000	27	65	DIFFERENTIABLE	85
B1N4I3	B1N4I3_ENTHI	Putative uncharacterized protein	EHI_055400	30	64	DIFFERENTIABLE	467
P90545	P90545_ENTHI	EhABP	abp1	31	63	DIFFERENTIABLE	224
C4LYJ7	C4LYJ7_ENTHI	Galactokinase, putative	EHI_094100	21	61	DISCRETE	570
C4M770	C4M770_ENTHI	70 kDa heat shock protein, putative	EHI_199590	24	59	DIFFERENTIABLE	74
Q1EQ28	Q1EQ28_ENTHI	Clathrin heavy chain		26	59	DISCRETE	2
O15581	O15581_ENTHI	Elongation factor 1 alpha		12	59	DIFFERENTIABLE	36
C4MB21	C4MB21_ENTHI	Profilin	EHI_176140	14	59	SUPERSET	34	P49230
B1N309	B1N309_ENTHI	Rab GDP dissociation inhibitor alpha, putative	EHI_167060	20	59	SUPERSET	499
C4M8B5	C4M8B5_ENTHI	Putative uncharacterized protein	EHI_101240	29	58	DISCRETE	210
C4LU66	C4LU66_ENTHI	Phosphoglucomutase	PGM	27	57	EQUIVALENT	51	O15820
C4M5S9	C4M5S9_ENTHI	L-myo-inositol-1-phosphate synthase	EHI_070720	29	56	DIFFERENTIABLE	45
C4M1Y2	C4M1Y2_ENTHI	Rab GDP dissociation inhibitor alpha, putative	EHI_164890	19	56	DIFFERENTIABLE	499
O15601	O15601_ENTHI	Elongation factor 1 alpha		12	55	DIFFERENTIABLE	36
Q24813	Q24813_ENTHI	Nicotinamide nucleotide transhydrogenase		26	54	DIFFERENTIABLE	467
Q24802	Q24802_ENTHI	V-type ATPase, A subunit, putative	EHI_043010	20	54	DISCRETE	229
C4LVB2	C4LVB2_ENTHI	Heat shock protein 90, putative	EHI_196940	24	53	SUPERSET	251	C4MBP1
Q76N78	Q76N78_ENTHI	Profilin		14	53	DIFFERENTIABLE	34
Q27648	Q27648_ENTHI	Hexokinase	HXK2	18	52	DIFFERENTIABLE	18
O77164	O77164_ENTHI	70 kDa heat shock protein Hsp70-Bip	BiP	21	50	DIFFERENTIABLE	74
C4M3P6	C4M3P6_ENTHI	Putative uncharacterized protein	EHI_140740	20	50	DIFFERENTIABLE	115
C4LYM3	C4LYM3_ENTHI	Putative uncharacterized protein	EHI_118750	11	48	DISCRETE	422
C4M0F4	C4M0F4_ENTHI	14-3-3 protein 3	EHI_006810	18	47	DIFFERENTIABLE	96
C4LWF5	C4LWF5_ENTHI	LIM zinc finger domain containing protein	EHI_096420	12	46	DISCRETE	463
Q27647	Q27647_ENTHI	Hexokinase	HXK1	17	45	SUPERSET	18	S0AW62, S0AWG9
C4M2Y7	C4M2Y7_ENTHI	Purine nucleoside phosphorylase, putative	EHI_048740	21	45	DISCRETE	78
C4M2S3	C4M2S3_ENTHI	Putative uncharacterized protein	EHI_161070	17	45	EQUIVALENT	128	S0AUR0
C4M0S1	C4M0S1_ENTHI	Xaa-Pro dipeptidase, putative	EHI_010070	20	44	DIFFERENTIABLE	681
C4M4H1	C4M4H1_ENTHI	Aminoacyl-histidine dipeptidase, putative	EHI_042170	16	43	DIFFERENTIABLE	356
O15603	O15603_ENTHI	NADH dependent alcohol dehydrogenase		10	43	DIFFERENTIABLE	142
C4LVD3	C4LVD3_ENTHI	Sulfate adenylyltransferase, putative	EHI_197160	20	43	SUPERSET	369	O76156
Q24861	Q24861_ENTHI	20 kDa antigen		16	42	DIFFERENTIABLE	175
C4M7M1	C4M7M1_ENTHI	Purine nucleoside phosphorylase, putative	EHI_200080	15	42	DISCRETE	8
C4M126	C4M126_ENTHI	Putative uncharacterized protein	EHI_105210	17	41	DISCRETE	212
C4LWT9	C4LWT9_ENTHI	Actin, putative	EHI_198930	15	40	SUPERSET	468	S0AWV9
C4M782	C4M782_ENTHI	ARP2/3 complex 34 kDa subunit, putative	EHI_091250	12	40	DIFFERENTIABLE	521
C4LXT9	C4LXT9_ENTHI	Endoribonuclease L-PSP, putative	EHI_087570	15	39	DISCRETE	646
C4M5A0	C4M5A0_ENTHI	40S ribosomal protein SA	EHI_081410	16	38	SUPERSET	221
C4M9S5	C4M9S5_ENTHI	Adenylate kinase	EHI_135470	15	38	SUPERSET	265	O96907
C4LX20	C4LX20_ENTHI	Superoxide dismutase	EHI_159160	9	38	SUPERSET	575	P34107
S0AZN9	S0AZN9_ENTHI	40S ribosomal protein SA		15	37	DIFFERENTIABLE	221
C4M5I6	C4M5I6_ENTHI	Actin-like protein, putative	EHI_111050	19	37	SUPERSET	812	S0AWX7
C4M5C4	C4M5C4_ENTHI	Enhancer binding protein-1	EHI_121780	19	37	SUPERSET	298
C4M818	C4M818_ENTHI	Transketolase, putative	EHI_002160	16	37	SUPERSET	166
C4LU56	C4LU56_ENTHI	60S ribosomal protein L5, putative	EHI_006860	18	36	DIFFERENTIABLE	32
C4M295	C4M295_ENTHI	Adenylyl cyclase-associated protein	EHI_136150	14	36	DIFFERENTIABLE	347
C4M7X2	C4M7X2_ENTHI	Lysine--tRNA ligase	EHI_047810	22	36	DIFFERENTIABLE	409
C4M946	C4M946_ENTHI	Putative uncharacterized protein	EHI_083620	19	36	DISCRETE	125
C4LYI1	C4LYI1_ENTHI	DEAD/DEAH box helicase, putative	EHI_093900	16	35	DISCRETE	300
C4LV11	C4LV11_ENTHI	Putative uncharacterized protein	EHI_092490	17	35	DISCRETE	346
C4LZC2	C4LZC2_ENTHI	Pyrophosphate-dependent phosphofructokinase	EHI_000730	14	34	SUPERSET	380	S0AWD4
C4M5V0	C4M5V0_ENTHI	Thioredoxin	EHI_026340	11	34	DIFFERENTIABLE	442
S0AYK4	S0AYK4_ENTHI	Grainin 1		14	33	DIFFERENTIABLE	88
C4LU42	C4LU42_ENTHI	Putative uncharacterized protein	EHI_068510	18	33	DISCRETE	6
C4M6L6	C4M6L6_ENTHI	Rho GDP exchange inhibitor, putative	EHI_147570	12	33	DIFFERENTIABLE	114
S0AZP0	S0AZP0_ENTHI	Uncharacterized protein		10	33	DIFFERENTIABLE	819
C4M2R6	C4M2R6_ENTHI	Uncharacterized protein	EHI_160980	10	33	SUPERSET	819	S0AWH5, S0AXD7, S0B021, S0B0U6
C4M6R1	C4M6R1_ENTHI	Alcohol dehydrogenase, putative	EHI_088020	14	32	DIFFERENTIABLE	142
C4LWJ6	C4LWJ6_ENTHI	LIM zinc finger domain containing protein	EHI_069060	9	32	DISCRETE	151
C4M3I0	C4M3I0_ENTHI	Phosphorylase	EHI_138380	13	32	DIFFERENTIABLE	216
Q9UAB5	Q9UAB5_ENTHI	Grainin 1	grainin 1	11	30	DIFFERENTIABLE	88
C4LZW4	C4LZW4_ENTHI	LIM zinc finger domain containing protein	EHI_194520	10	30	DIFFERENTIABLE	730
C4LV07	C4LV07_ENTHI	Malate dehydrogenase, putative	EHI_092450	7	30	DIFFERENTIABLE	636
C4LWW4	C4LWW4_ENTHI	Methionine aminopeptidase 2	EHI_126880	10	30	DISCRETE	650
Q8WQT5	Q8WQT5_ENTHI	Phosphorylase		13	30	DIFFERENTIABLE	216
C4M882	C4M882_ENTHI	Uncharacterized protein	EHI_098800	12	30	DISCRETE	679
C4LT49	C4LT49_ENTHI	40S ribosomal protein S24, putative	EHI_148820	11	29	EQUIVALENT	472	C4M549
C4M6Y2	C4M6Y2_ENTHI	Polyadenylate-binding protein, putative	EHI_033250	16	28	EQUIVALENT	294	S0AYB2
Q5NT41	Q5NT41_ENTHI	Small GTPase EhRabC3	EhRabC3	12	28	DIFFERENTIABLE	103
S0B1X1	S0B1X1_ENTHI	Uncharacterized protein		10	28	DIFFERENTIABLE	260
C4LTS5	C4LTS5_ENTHI	Uncharacterized protein	EHI_050520	9	28	EQUIVALENT	173	S0AWI2
B1N336	B1N336_ENTHI	40S ribosomal protein S4, putative	EHI_118170	11	27	SUPERSET	500	C4LYF4, S0AVH8, S0AZM5
B1N3R9	B1N3R9_ENTHI	60S ribosomal protein L7a, putative	EHI_169360	10	27	SUPERSET	48	C4LVH6
C4LXK4	C4LXK4_ENTHI	Fe-hydrogenase, putative	EHI_073390	14	27	SUPERSET	400	Q9GTX0, S0AXI4
B1N368	B1N368_ENTHI	Putative uncharacterized protein	EHI_065490	14	26	DISCRETE	118
C4M711	C4M711_ENTHI	Putative uncharacterized protein	EHI_189930	9	26	DISCRETE	202
C4M0A8	C4M0A8_ENTHI	Putative uncharacterized protein	EHI_005150	16	26	DISCRETE	182
C4LVQ1	C4LVQ1_ENTHI	Actin-binding protein, cofilin/tropomyosin family	EHI_186840	9	25	DISCRETE	261
C4M7W2	C4M7W2_ENTHI	Aldose reductase, putative	EHI_029620	12	25	SUPERSET	49
C4M8C2	C4M8C2_ENTHI	Aldose reductase, putative	EHI_039190	12	25	DIFFERENTIABLE	49
C4M296	C4M296_ENTHI	Calreticulin, putative	EHI_136160	14	25	DISCRETE	189
C4LXG4	C4LXG4_ENTHI	Purine nucleoside phosphorylase, putative	EHI_130960	10	25	SUPERSET	557	S0AXJ9, S0AXL9
C4LYR0	C4LYR0_ENTHI	Thioredoxin	EHI_004490	9	25	DISCRETE	338
B1N2S4	B1N2S4_ENTHI	WD repeat protein 2, putative	EHI_142190	10	25	SUPERSET	723	C4LZ00
C4M0Q2	C4M0Q2_ENTHI	40S ribosomal protein S8	EHI_053190	12	24	SUPERSET	312	C4M8Y8, S0AWP6
C4M727	C4M727_ENTHI	60S ribosomal protein L27, putative	EHI_183480	11	24	DIFFERENTIABLE	341
C4M030	C4M030_ENTHI	Rubrerythrin, putative	EHI_134810	10	24	DISCRETE	498
C4LW95	C4LW95_ENTHI	Thioredoxin reductase	EHI_155440	9	24	SUPERSET	405
B1N2I3	B1N2I3_ENTHI	40S ribosomal protein S14, putative	EHI_074090	10	23	DIFFERENTIABLE	296
C4LZB0	C4LZB0_ENTHI	40S ribosomal protein S6	EHI_000590	8	23	SUPERSET	79	S0AWS4, S0AWU9, S0AZ56
C4M7H1	C4M7H1_ENTHI	Actobindin, putative	EHI_158570	10	23	DIFFERENTIABLE	163
C4LU18	C4LU18_ENTHI	Adenosylhomocysteinase	EHI_068250	12	23	DISCRETE	204
C4LW30	C4LW30_ENTHI	RNA modification enzymes, MiaB-family	EHI_141830	12	23	DISCRETE	291
C4M7K9	C4M7K9_ENTHI	Thioredoxin	EHI_170420	6	23	DIFFERENTIABLE	442
C4LUC7	C4LUC7_ENTHI	Unconventional myosin IB	EHI_110810	11	23	DIFFERENTIABLE	278
C4M9B0	C4M9B0_ENTHI	60S ribosomal protein L9, putative	EHI_193080	10	22	DIFFERENTIABLE	322
C4LVZ9	C4LVZ9_ENTHI	60S ribosomal protein L9, putative	EHI_126140	10	22	DIFFERENTIABLE	322
C4LZ50	C4LZ50_ENTHI	Actin binding protein, putative	EHI_104390	9	22	SUPERSET	297	O76753
Q1EQ51	Q1EQ51_ENTHI	EhSec31	EHI_103410	13	22	DISCRETE	117
C4LT47	C4LT47_ENTHI	Gal/GalNAc lectin light subunit	EHI_148790	10	22	DIFFERENTIABLE	283
C4LZM7	C4LZM7_ENTHI	Peptidase, putative	EHI_175020	10	22	DIFFERENTIABLE	712
C4LYR5	C4LYR5_ENTHI	Putative uncharacterized protein	EHI_004550	10	22	DIFFERENTIABLE	343
C4M5Q7	C4M5Q7_ENTHI	Rho family GTPase	EHI_129750	12	22	DIFFERENTIABLE	5
C4M5Z7	C4M5Z7_ENTHI	Rho family GTPase	EHI_181250	9	22	SUPERSET	5	C4M8K6, Q24814
C4LVN8	C4LVN8_ENTHI	Translation initiation factor eIF-5A, putative	EHI_186480	6	22	DIFFERENTIABLE	137
C4LZ12	C4LZ12_ENTHI	Tyrosyl-tRNA synthetase, putative	EHI_009240	9	22	DISCRETE	75
C4M0Z2	C4M0Z2_ENTHI	40S ribosomal protein S17, putative	EHI_135060	6	21	SUPERSET	366
C4M7U0	C4M7U0_ENTHI	40S ribosomal protein S2, putative	EHI_020280	9	21	SUPERSET	401	S0AVL0
C4LT02	C4LT02_ENTHI	40S ribosomal protein S3, putative	EHI_146340	13	21	EQUIVALENT	179	S0AZJ3
B1N2Z3	B1N2Z3_ENTHI	60S acidic ribosomal protein P0, putative	EHI_148850	10	21	SUPERSET	112	S0AW70, S0AYC4, S0AZC9, S0B010, S0B2A3, S0B2T7
C4LSV0	C4LSV0_ENTHI	ARP2/3 complex 20 kDa subunit, putative	EHI_152660	10	21	DISCRETE	302
C4M1X3	C4M1X3_ENTHI	Cysteine protease binding protein family 1	cpbf1	9	21	DISCRETE	222
O15635	O15635_ENTHI	Cysteine synthase A, putative	cysteine synthase type II	9	21	SUPERSET	822	S0AX08
C4LV48	C4LV48_ENTHI	Enhancer binding protein-2, putative	EHI_182670	12	21	DIFFERENTIABLE	64
C4LYN2	C4LYN2_ENTHI	Fibrillarin, putative	EHI_118840	7	21	EQUIVALENT	632	S0AY23
C4M9P2	C4M9P2_ENTHI	Filopodin, putative	EHI_080740	11	21	DIFFERENTIABLE	40
C4M1P6	C4M1P6_ENTHI	Glutaminyl-tRNA synthetase, putative	EHI_062700	10	21	DISCRETE	695
C4M332	C4M332_ENTHI	LIM zinc finger domain containing protein	EHI_025450	10	21	DISCRETE	608
C4M2K7	C4M2K7_ENTHI	Methionyl-tRNA synthetase, putative	EHI_079860	10	21	DIFFERENTIABLE	409
C4LZB2	C4LZB2_ENTHI	Nucleotide binding protein 2, putative	EHI_000610	6	21	DISCRETE	66
C4M8B0	C4M8B0_ENTHI	Ras family GTPase	EHI_058090	7	21	SUPERSET	532
C4LYU0	C4LYU0_ENTHI	Tubulin alpha chain, putative	EHI_010530	14	21	EQUIVALENT	488	S0AX28
C4LXB1	C4LXB1_ENTHI	14-3-3 protein 2	EHI_098280	10	20	SUPERSET	96
C4LVZ6	C4LVZ6_ENTHI	40S ribosomal protein S5, putative	EHI_200850	9	20	DIFFERENTIABLE	550
C4LT26	C4LT26_ENTHI	4-alpha-glucanotransferase, putative	EHI_148560	11	20	DIFFERENTIABLE	185
C4LSS0	C4LSS0_ENTHI	Arginase, putative	EHI_152330	10	20	DISCRETE	345
C4M943	C4M943_ENTHI	Coronin	EHI_083590	12	20	DIFFERENTIABLE	642
C4LWQ7	C4LWQ7_ENTHI	Putative uncharacterized protein	EHI_198610	6	20	DISCRETE	693
Q5NT05	Q5NT05_ENTHI	Rab family GTPase	EhRabX11	11	20	DISCRETE	415
C4LV24	C4LV24_ENTHI	Seryl-tRNA synthetase, putative	EHI_092640	9	20	DIFFERENTIABLE	555
C4M384	C4M384_ENTHI	Starch branching enzyme, putative	EHI_106090	13	20	DIFFERENTIABLE	304
C4M2N0	C4M2N0_ENTHI	Tubulin alpha chain, putative	EHI_005950	12	20	EQUIVALENT	488	P31017
C4LZ95	C4LZ95_ENTHI	UDP-glucose pyrophosphorylase, putative	EHI_000440	11	20	DISCRETE	624
O00851	O00851_ENTHI	Unconventional myosin IB		9	20	DIFFERENTIABLE	278
C4M220	C4M220_ENTHI	Aspartate ammonia-lyase, putative	EHI_150390	10	19	DIFFERENTIABLE	231
B1N3Y5	B1N3Y5_ENTHI	Bifunctional short chain isoprenyl diphosphate synthase, putative	EHI_142720	8	19	SUPERSET	578	C4M111
C4LVI7	C4LVI7_ENTHI	Cortexillin II, putative	EHI_103430	10	19	DISCRETE	612
C4LYB3	C4LYB3_ENTHI	Filopodin, putative	EHI_167130	14	19	DISCRETE	527
C4LU80	C4LU80_ENTHI	LIM zinc finger domain containing protein	EHI_110280	6	19	DISCRETE	354
C4LUK9	C4LUK9_ENTHI	LIM zinc finger domain containing protein	EHI_022960	8	19	DISCRETE	759
Q86S08	Q86S08_ENTHI	Malate dehydrogenase	Mdh1	10	19	DIFFERENTIABLE	145
C4M1M6	C4M1M6_ENTHI	Thioredoxin, putative	EHI_133970	7	19	DISCRETE	50
C4LX42	C4LX42_ENTHI	TolA protein, putative	EHI_159620	8	19	DIFFERENTIABLE	343
Q4VSM4	Q4VSM4_ENTHI	Vacuolar ATPase subunit B	EHI_189850	13	19	DIFFERENTIABLE	205
C4M2X6	C4M2X6_ENTHI	Actin, putative	EHI_048630	9	18	DIFFERENTIABLE	947
C4MBJ7	C4MBJ7_ENTHI	Copine, putative	EHI_163260	8	18	DIFFERENTIABLE	42
C4M3R5	C4M3R5_ENTHI	Dynamin-like protein	EHI_052740	10	18	DISCRETE	796
C4M3N6	C4M3N6_ENTHI	F-actin capping protein alpha subunit, putative	EHI_033740	7	18	DISCRETE	743
C4LZK9	C4LZK9_ENTHI	Glucosamine-6-phosphate isomerase, putative	EHI_174640	8	18	DISCRETE	295
C4M1I7	C4M1I7_ENTHI	LIM zinc finger domain containing protein	EHI_001070	7	18	DISCRETE	424
C4M3Z6	C4M3Z6_ENTHI	Phosphoglucomutase/phosphomannomutase family protein	EHI_185280	11	18	DISCRETE	39
C4M9I2	C4M9I2_ENTHI	SH3 domain protein	EHI_187770	6	18	EQUIVALENT	358	S0AXC8
Q5NT27	Q5NT27_ENTHI	Small GTPase EhRab2C	EhRab2C	9	18	DIFFERENTIABLE	164
C4LUI9	C4LUI9_ENTHI	Threonine dehydratase, putative	EhTD2	10	18	DIFFERENTIABLE	139
C4M323	C4M323_ENTHI	14-3-3 protein 1	EHI_025360	9	17	SUPERSET	96	P42648
C4LZ42	C4LZ42_ENTHI	40S ribosomal protein S18, putative	EHI_009680	8	17	SUPERSET	218
S0AVS1	S0AVS1_ENTHI	40S ribosomal protein S2, putative		7	17	DIFFERENTIABLE	401
C4LT81	C4LT81_ENTHI	40S ribosomal protein S5, putative	EHI_137870	9	17	DIFFERENTIABLE	550
C4M9F9	C4M9F9_ENTHI	40S ribosomal protein S7, putative	EHI_067530	9	17	DIFFERENTIABLE	303
C4M1E1	C4M1E1_ENTHI	60S ribosomal protein L12, putative	EHI_191750	8	17	DIFFERENTIABLE	887
C4M7F5	C4M7F5_ENTHI	Alcohol dehydrogenase, putative	EHI_166490	10	17	DIFFERENTIABLE	434
C4LYJ9	C4LYJ9_ENTHI	ARP2/3 complex 41 kDa subunit, putative	EHI_094120	7	17	SUPERSET	232	S0AVM3
C4M5C6	C4M5C6_ENTHI	Deoxyribose-phosphate aldolase, putative	EHI_121800	8	17	DIFFERENTIABLE	252
C4MBE2	C4MBE2_ENTHI	EF-hand calcium-binding domain containing protein	EHI_060740	6	17	SUPERSET	699	Q9GSV7
Q01958	CPP2_ENTHI	Histolysain	CPP2	7	17	SUPERSET	195	S0AUZ1, S0AW34, S0AWK6, S0AXH6, S0AYW8
C4M5N2	C4M5N2_ENTHI	Nucleolar protein Nop56, putative	EHI_122740	6	17	DISCRETE	638
C4M8Y1	C4M8Y1_ENTHI	Putative uncharacterized protein	EHI_080260	8	17	DIFFERENTIABLE	762
C4MAR5	C4MAR5_ENTHI	RAD23 protein, putative	EHI_001400	6	17	DIFFERENTIABLE	262
Q5NT28	Q5NT28_ENTHI	Small GTPase EhRab2B	EhRab2B	8	17	DIFFERENTIABLE	164
Q9BLE4	Q9BLE4_ENTHI	Small GTPase Rab11B	EhRab11B	9	17	DIFFERENTIABLE	299
C4LSM2	C4LSM2_ENTHI	Translation initiation factor eIF-5A, putative	EHI_151810	6	17	DIFFERENTIABLE	137
C4LXM0	C4LXM0_ENTHI	40S ribosomal protein S15a, putative	EHI_105140	9	16	DISCRETE	892
C4LSR1	C4LSR1_ENTHI	40S ribosomal protein S27	EHI_152230	7	16	DIFFERENTIABLE	258
B1N2Q5	B1N2Q5_ENTHI	Actin-related protein 2/3 complex subunit 5	EHI_103440	7	16	DISCRETE	157
C4M0L4	C4M0L4_ENTHI	Aminopeptidase, putative	EHI_008380	9	16	DISCRETE	503
C4LZL6	C4LZL6_ENTHI	ARP2/3 complex 21 kDa subunit, putative	EHI_174910	6	16	DIFFERENTIABLE	1039
C4LT17	C4LT17_ENTHI	Aspartate--ammonia ligase, putative	EHI_148470	10	16	DISCRETE	662
S0AZA2	S0AZA2_ENTHI	Copine, putative		7	16	DIFFERENTIABLE	42
Q24834	Q24834_ENTHI	Disulphide oxidoreductase	gEh-34 KDa protein	6	16	DIFFERENTIABLE	405
C4M7Y2	C4M7Y2_ENTHI	Eukaryotic translation elongation factor 1 gamma, putative	EHI_119540	4	16	DIFFERENTIABLE	57
Q8MZT6	Q8MZT6_ENTHI	Gal/GalNAc lectin heavy subunit region C	hgl	6	16	DIFFERENTIABLE	24
C4LYP1	C4LYP1_ENTHI	LIM zinc finger domain containing protein	EHI_004170	7	16	DISCRETE	885
C4LY07	C4LY07_ENTHI	Ras GTPase activating protein, putative	EHI_035800	10	16	DISCRETE	832
C4MB22	C4MB22_ENTHI	Ribose 5-phosphate isomerase, putative	EHI_176150	5	16	DISCRETE	995
C4M3R7	C4M3R7_ENTHI	TolA-like protein, putative	EHI_052780	8	16	EQUIVALENT	343	S0AYC0
C4LVJ5	C4LVJ5_ENTHI	Ubiquitin-like, putative	EHI_103510	6	16	DISCRETE	161
C4LYS4	C4LYS4_ENTHI	Vesicle-fusing ATPase, putative	EHI_004640	9	16	DIFFERENTIABLE	70
C4MB71	C4MB71_ENTHI	19S cap proteasome S2 subunit	EHI_198010	7	15	DIFFERENTIABLE	518
B1N2I7	B1N2I7_ENTHI	60S ribosomal protein L10a, putative	EHI_135790	7	15	DIFFERENTIABLE	700
C4M3S9	C4M3S9_ENTHI	90 kDa heat shock protein, putative	EHI_163480	8	15	DISCRETE	454
C4LTB5	C4LTB5_ENTHI	Actin-related protein 2/3 complex subunit 1A, putative	EHI_045000	6	15	DIFFERENTIABLE	232
C4LZS3	C4LZS3_ENTHI	Actobindin, putative	EHI_039020	6	15	DIFFERENTIABLE	163
C4M8E1	C4M8E1_ENTHI	Centromere/microtubule binding protein cbf5, putative	EHI_115300	7	15	DISCRETE	287
B1N341	B1N341_ENTHI	Cortexillin, putative	EHI_104560	8	15	DIFFERENTIABLE	469
S0AXW2	S0AXW2_ENTHI	Cysteine proteinase 2		6	15	DIFFERENTIABLE	195
C4LYP7	C4LYP7_ENTHI	Guanine nucleotide regulatory protein, putative	EHI_004230	8	15	EQUIVALENT	466	S0AY13, S0AZI0
C4LSK1	C4LSK1_ENTHI	Helicase, putative	EHI_151600	7	15	DIFFERENTIABLE	367
C4LSV1	C4LSV1_ENTHI	Malate dehydrogenase	EHI_152670	7	15	DIFFERENTIABLE	145
C4MAZ9	C4MAZ9_ENTHI	N-acetylmuraminidase, putative	EHI_176820	6	15	DISCRETE	698
C4M8M8	C4M8M8_ENTHI	Putative uncharacterized protein	EHI_114330	8	15	DISCRETE	305
B1N5A6	B1N5A6_ENTHI	Putative uncharacterized protein	EHI_154450	6	15	DISCRETE	697
C4LW65	C4LW65_ENTHI	Uncharacterized protein	EHI_142210	8	15	DISCRETE	1053
B1N316	B1N316_ENTHI	40S ribosomal protein S16, putative	EHI_131190	8	14	EQUIVALENT	43	C4M2R7
B1N3K9	B1N3K9_ENTHI	40S ribosomal protein S7, putative	EHI_140540	8	14	DIFFERENTIABLE	303
C4LUW3	C4LUW3_ENTHI	40S ribosomal protein S9	EHI_179000	7	14	EQUIVALENT	97	O15612, S0AV16
Q1EPY2	Q1EPY2_ENTHI	EhVps45A	EHI_160900	6	14	DIFFERENTIABLE	87
Q6SCK6	Q6SCK6_ENTHI	Mitogen-activated protein kinase	EHI_073650	7	14	SUPERSET	363	S0AYE4
C4LVV2	C4LVV2_ENTHI	PIWI, putative	EHI_125650	10	14	DISCRETE	147
C4M0W8	C4M0W8_ENTHI	Putative uncharacterized protein	EHI_015300	9	14	DIFFERENTIABLE	340
Q5NT23	Q5NT23_ENTHI	Small GTPase EhRabK1	EhRabK1	7	14	DISCRETE	820
Q9BLF3	Q9BLF3_ENTHI	Small GTPase Rab1A	EhRab1A	8	14	DIFFERENTIABLE	277
Q9BLE8	Q9BLE8_ENTHI	Small GTPase Rab7A	EhRab7A	4	14	SUPERSET	188	Q9NHW8
Q9BLF2	Q9BLF2_ENTHI	Small GTPase RabC1	EhRabC1	7	14	DIFFERENTIABLE	103
C4M067	C4M067_ENTHI	Thioredoxin, putative	EHI_021560	7	14	DIFFERENTIABLE	591
C4M2U3	C4M2U3_ENTHI	Uncharacterized protein	EHI_188760	7	14	DIFFERENTIABLE	154
C4LXX7	C4LXX7_ENTHI	40S ribosomal protein S13, putative	EHI_035460	7	13	EQUIVALENT	330	C4M9M7
C4LZG9	C4LZG9_ENTHI	60S ribosomal protein L11, putative	EHI_199970	5	13	EQUIVALENT	437	C4LZP2
C4M6S2	C4M6S2_ENTHI	60S ribosomal protein L14, putative	EHI_184470	5	13	SUPERSET	768	C4M8C9
C4LV69	C4LV69_ENTHI	60S ribosomal protein L21, putative	EHI_161180	5	13	EQUIVALENT	920	C4LWK0, P38653
C4MA09	C4MA09_ENTHI	60S ribosomal protein L7, putative	EHI_146530	7	13	SUPERSET	342	S0AXE0
C4LXL1	C4LXL1_ENTHI	ADP-ribosylation factor 1, putative	EHI_137720	8	13	DIFFERENTIABLE	491
C4M049	C4M049_ENTHI	Aminopeptidase, putative	EHI_021340	8	13	DISCRETE	640
C4LUJ0	C4LUJ0_ENTHI	Beta-tubulin, putative	EHI_049920	7	13	DIFFERENTIABLE	180
B1N3L7	B1N3L7_ENTHI	ENTH domain protein, putative	EHI_052870	6	13	DIFFERENTIABLE	19
C4M483	C4M483_ENTHI	G protein alpha subunit, putative	EHI_140350	7	13	DISCRETE	133
C4LXL0	C4LXL0_ENTHI	Glycyl-tRNA synthetase, putative	EHI_073460	8	13	DISCRETE	247
C4LWG9	C4LWG9_ENTHI	Lysozyme, putative	EHI_096570	4	13	EQUIVALENT	519	O97368
C4M779	C4M779_ENTHI	Putative uncharacterized protein	EHI_199660	5	13	DISCRETE	233
B1N4Q6	B1N4Q6_ENTHI	26S protease regulatory subunit 7, putative	EHI_080890	7	12	EQUIVALENT	382	S0AX32
C4LZP6	C4LZP6_ENTHI	40S ribosomal protein S16, putative	EHI_038620	7	12	DIFFERENTIABLE	43
C4LXZ0	C4LXZ0_ENTHI	60S ribosomal protein L18a	EHI_090020	7	12	DISCRETE	267
C4LVP4	C4LVP4_ENTHI	Actin-binding protein, cofilin/tropomyosin family	EHI_186770	6	12	EQUIVALENT	172	S0AYP5
C4LUP7	C4LUP7_ENTHI	Alpha-amylase family protein	EHI_023360	6	12	DIFFERENTIABLE	152
C4LUQ9	C4LUQ9_ENTHI	Calmodulin, putative	EHI_023500	5	12	DISCRETE	41
P36185	ACP2_ENTHI	Cysteine proteinase ACP2	ACP2	5	12	DIFFERENTIABLE	195
C4LX69	C4LX69_ENTHI	Dihydropyrimidine dehydrogenase, putative	EHI_012980	8	12	DISCRETE	580
Q1EQ46	Q1EQ46_ENTHI	EhSec24C	EHI_048310	6	12	DISCRETE	20
C4M8K8	C4M8K8_ENTHI	Heat shock protein 70, putative	EHI_197860	6	12	DISCRETE	845
C4M032	C4M032_ENTHI	NAD synthetase, putative	EHI_134830	7	12	EQUIVALENT	653	S0AX24
Q86R89	Q86R89_ENTHI	NifU		7	12	EQUIVALENT	92	Q8MU40
C4LZ47	C4LZ47_ENTHI	Nucleoside diphosphate kinase, putative	EHI_104360	7	12	DISCRETE	607
C4LUL4	C4LUL4_ENTHI	Proteasome subunit alpha type	EHI_004760	5	12	EQUIVALENT	1143	Q94561, S0AWH2
C4M8Z5	C4M8Z5_ENTHI	Putative uncharacterized protein	EHI_086690	6	12	EQUIVALENT	343	S0AZA1
C4LWX8	C4LWX8_ENTHI	Putative uncharacterized protein	EHI_127030	6	12	DISCRETE	289
C4LYI8	C4LYI8_ENTHI	Putative uncharacterized protein	EHI_093970	6	12	DISCRETE	82
C4LSY9	C4LSY9_ENTHI	Ran family GTPase	EHI_148190	8	12	DISCRETE	58
Q24804	Q24804_ENTHI	Rap homologue 1	EhRAP1	4	12	DIFFERENTIABLE	532
C4M1Q5	C4M1Q5_ENTHI	Thioredoxin, putative	EHI_062790	4	12	DISCRETE	554
C4M7C6	C4M7C6_ENTHI	Uncharacterized protein	EHI_007350	5	12	DISCRETE	523
C4LZW8	C4LZW8_ENTHI	26S protease regulatory subunit, putative	EHI_194570	7	11	DIFFERENTIABLE	382
C4M660	C4M660_ENTHI	60S acidic riboomal protein P1, putative	EHI_042920	4	11	DISCRETE	635
C4LWZ3	C4LWZ3_ENTHI	60S ribosomal protein L2/L8, putative	EHI_150470	4	11	SUPERSET	495
S0B1T5	S0B1T5_ENTHI	Alcohol dehydrogenase, putative		9	11	DIFFERENTIABLE	434
C4LWX7	C4LWX7_ENTHI	Arginyl-tRNA synthetase	EHI_127020	5	11	DISCRETE	836
C4M079	C4M079_ENTHI	Bacterial transferase hexapeptide family protein	EHI_004840	5	11	DISCRETE	589
C4LTC5	C4LTC5_ENTHI	Cell division cycle protein 48, putative	EHI_045120	4	11	DIFFERENTIABLE	70
C4M342	C4M342_ENTHI	Cysteine protease binding protein family 8	cpbf8	7	11	DISCRETE	661
Q76KF5	Q76KF5_ENTHI	D-phosphoglycerate dehydrogenase	EhPGDH	8	11	DIFFERENTIABLE	203
Q6AW60	Q6AW60_ENTHI	EhRab11A protein	EhRAB11A	6	11	DIFFERENTIABLE	299
B1N4F4	B1N4F4_ENTHI	Elongation factor 1 beta, putative	EHI_183460	4	11	DIFFERENTIABLE	729
C4M096	C4M096_ENTHI	F-actin capping protein beta subunit, putative	EHI_005020	4	11	SUPERSET	270	S0AV06, S0AXS0
C4M353	C4M353_ENTHI	Glycosyltransferase, putative	EHI_085980	6	11	DISCRETE	191
C4LWN6	C4LWN6_ENTHI	HEAT repeat domain containing protein	EHI_069480	7	11	DISCRETE	192
C4M553	C4M553_ENTHI	Leucine-rich repeat containing protein	EHI_177990	7	11	DISCRETE	255
C4M538	C4M538_ENTHI	Phenylalanyl-tRNA synthetase alpha subunit, putative	EHI_078230	8	11	DISCRETE	237
C4LWJ2	C4LWJ2_ENTHI	Phosphorylase	EHI_096830	8	11	DIFFERENTIABLE	216
C4M131	C4M131_ENTHI	Receptor mediated endocytosis protein, putative	EHI_105270	5	11	DIFFERENTIABLE	19
C4M0Y0	C4M0Y0_ENTHI	Rho family GTPase	EHI_015440	5	11	SUPERSET	860	C4M4W4, Q8I891, Q8I892, Q8I894, Q95TD4
C4LTL7	C4LTL7_ENTHI	Rho family GTPase	EHI_012240	5	11	SUPERSET	89
C4LX92	C4LX92_ENTHI	Rho family GTPase	EHI_013260	5	11	DIFFERENTIABLE	89
C4M3R0	C4M3R0_ENTHI	Rho family GTPase	EHI_146180	5	11	DISCRETE	109
C4MB14	C4MB14_ENTHI	Serine/threonine-protein kinase 3, putative	EHI_156670	5	11	SUPERSET	490	S0AZB8
C4M419	C4M419_ENTHI	T-complex protein 1 subunit delta	EHI_114120	7	11	DIFFERENTIABLE	230
C4M746	C4M746_ENTHI	UDP-glucose 4-epimerase, putative	EHI_192050	5	11	EQUIVALENT	644	S0AYJ6
O96908	O96908_ENTHI	UMP-CMP kinase, putative	EHI_143580	4	11	DISCRETE	383
C4M846	C4M846_ENTHI	26s protease regulatory subunit	EHI_052050	6	10	DIFFERENTIABLE	382
C4LXC8	C4LXC8_ENTHI	60S ribosomal protein L18, putative	EHI_187740	4	10	DISCRETE	1055
C4LW09	C4LW09_ENTHI	60S ribosomal protein L3, putative	EHI_055670	7	10	SUPERSET	416	S0AUR3, S0AYA3
C4LT96	C4LT96_ENTHI	60S ribosomal protein L32, putative	EHI_044770	3	10	EQUIVALENT	1401	C4LV05, C4M2W1
C4M6A4	C4M6A4_ENTHI	Acetyl-coA carboxylase, putative	EHI_082530	8	10	DISCRETE	508
C4M013	C4M013_ENTHI	Acetyltransferase, putative	EHI_134640	5	10	DIFFERENTIABLE	583
C4LVW6	C4LVW6_ENTHI	Chaperonin-containing TCP-1, zeta subunit, putative	EHI_125800	7	10	SUPERSET	168	Q9GYV7
C4LXZ9	C4LXZ9_ENTHI	Galactose-inhibitable lectin 35 kDa subunit	EHI_035690	5	10	SUPERSET	283
C4M5G9	C4M5G9_ENTHI	Galactose-inhibitable lectin, putative	EHI_058330	4	10	EQUIVALENT	283	S0B094
C4LWA8	C4LWA8_ENTHI	Glutamyl-tRNA synthetase, putative	EHI_155570	4	10	DISCRETE	423
C4LSZ7	C4LSZ7_ENTHI	GTP-binding protein, putative	EHI_148270	6	10	DISCRETE	585
C4M023	C4M023_ENTHI	Iron-sulfur flavoprotein, putative	EHI_134740	3	10	DISCRETE	904
C4LY19	C4LY19_ENTHI	Isoleucyl-tRNA synthetase, putative	EHI_177660	6	10	DIFFERENTIABLE	35
Q86D27	Q86D27_ENTHI	Methionine gamma-lyase	metg	4	10	DIFFERENTIABLE	436
C4M934	C4M934_ENTHI	Putative uncharacterized protein	EHI_097630	3	10	DISCRETE	155
B1N2W4	B1N2W4_ENTHI	Putative uncharacterized protein	EHI_098430	5	10	DIFFERENTIABLE	199
C4M261	C4M261_ENTHI	Skp1 protein, putative	EHI_174130	4	10	DISCRETE	396
C4MAW3	C4MAW3_ENTHI	SnoRNA binding protein, putative	EHI_183900	5	10	DISCRETE	439
C4LW75	C4LW75_ENTHI	T-complex protein 1 subunit alpha	EHI_155220	6	10	DISCRETE	317
C4M4T9	C4M4T9_ENTHI	3'(2'),5'-bisphosphate nucleotidase, putative	EHI_193350	5	9	DIFFERENTIABLE	393
C4LWS0	C4LWS0_ENTHI	40S ribosomal protein S19, putative	EHI_198740	5	9	SUPERSET	457	C4MA13
C4M609	C4M609_ENTHI	40S ribosomal protein S3a	EHI_072040	5	9	SUPERSET	315
C4M2J3	C4M2J3_ENTHI	60S ribosomal protein L17, putative	EHI_054740	4	9	DIFFERENTIABLE	337
C4LYV2	C4LYV2_ENTHI	60S ribosomal protein L7, putative	EHI_010650	6	9	SUPERSET	342	S0AYD9
C4M938	C4M938_ENTHI	60S ribosomal protein L7, putative	EHI_025830	6	9	DIFFERENTIABLE	342
C4MAJ4	C4MAJ4_ENTHI	Acetyltransferase, putative	EHI_143110	5	9	DIFFERENTIABLE	583
C4LUW9	C4LUW9_ENTHI	Adenylyl-sulfate kinase	EHI_179080	6	9	DIFFERENTIABLE	385
C4LWS5	C4LWS5_ENTHI	Alanyl-tRNA synthetase, putative	EHI_198790	5	9	DISCRETE	1494
B1N355	B1N355_ENTHI	AP-2 complex subunit mu, putative	EHI_124560	6	9	EQUIVALENT	571	Q1EQ16, S0AX88
C4M5Y9	C4M5Y9_ENTHI	Copine, putative	EHI_137110	5	9	DISCRETE	896
C4LUR3	C4LUR3_ENTHI	Cysteine protease binding protein family 6	cpbf6	6	9	DISCRETE	249
C4LU92	C4LU92_ENTHI	Guanine nucleotide-binding protein subunit beta 2-like 1, putative	EHI_110400	4	9	DIFFERENTIABLE	1173
C4LUB9	C4LUB9_ENTHI	PCTP-like protein, putative	EHI_110720	4	9	EQUIVALENT	1015	C4M0E1
C4M525	C4M525_ENTHI	Peptidyl-prolyl cis-trans isomerase	EHI_128100	5	9	DISCRETE	259
C4LWS1	C4LWS1_ENTHI	Polyadenylate-binding protein, putative	EHI_198750	6	9	DISCRETE	514
C4M3U5	C4M3U5_ENTHI	Proteasome subunit alpha type	EHI_163650	5	9	EQUIVALENT	604	C4MA29
C4M3C4	C4M3C4_ENTHI	Protein kinase, putative	EHI_053060	4	9	DISCRETE	421
C4M2J9	C4M2J9_ENTHI	Putative uncharacterized protein	EHI_054800	5	9	EQUIVALENT	121	S0AWH8, S0AXQ8
C4M2I4	C4M2I4_ENTHI	Serine carboxypeptidase (S28) family protein	EHI_054530	4	9	DISCRETE	141
C4M658	C4M658_ENTHI	Thioredoxin, putative	EHI_042900	5	9	DISCRETE	934
C4M561	C4M561_ENTHI	Uncharacterized protein	EHI_178080	4	9	DISCRETE	248
B1N3T5	B1N3T5_ENTHI	Vacuolar protein sorting-associated protein 45, putative	EHI_154290	5	9	DIFFERENTIABLE	87
C4M574	C4M574_ENTHI	40S ribosomal protein S12	EHI_111760	3	8	DIFFERENTIABLE	462
C4LY50	C4LY50_ENTHI	40S ribosomal protein S25, putative	EHI_177470	4	8	EQUIVALENT	389	C4M9F4
C4LSZ3	C4LSZ3_ENTHI	60S ribosomal protein L37a, putative	EHI_148230	3	8	DIFFERENTIABLE	883
C4LTE3	C4LTE3_ENTHI	60S ribosomal protein L6, putative	EHI_140550	5	8	SUPERSET	309
C4LXI9	C4LXI9_ENTHI	Actin, putative	EHI_131230	3	8	DIFFERENTIABLE	947
C4LZS8	C4LZS8_ENTHI	Actin, putative	EHI_039070	3	8	DISCRETE	1257
O15602	ACTO_ENTHI	Actobindin homolog		4	8	DIFFERENTIABLE	163
B1N424	B1N424_ENTHI	Adapter-related protein complex 3 (AP-3) subunit, putative	EHI_083430	5	8	DISCRETE	99
C4M7C8	C4M7C8_ENTHI	Beta-hexosaminidase	EHI_007330	5	8	EQUIVALENT	186	Q86M34
C4M7M4	C4M7M4_ENTHI	Cell surface protease gp63, putative	EHI_200230	4	8	DISCRETE	998
Q1EQ03	Q1EQ03_ENTHI	EhSyntaxin B	EHI_021410	4	8	DIFFERENTIABLE	348
B1N2L3	B1N2L3_ENTHI	Galactose-specific adhesin light subunit, putative	EHI_049690	5	8	SUPERSET	283	Q24846
C4M6P0	C4M6P0_ENTHI	Leucyl-tRNA synthetase, putative	EHI_161970	5	8	DISCRETE	611
C4LSX5	C4LSX5_ENTHI	Putative uncharacterized protein	EHI_148050	4	8	DISCRETE	93
C4LYT1	C4LYT1_ENTHI	Putative uncharacterized protein	EHI_010340	5	8	SUPERSET	132	S0AZK4
C4LUS2	C4LUS2_ENTHI	Putative uncharacterized protein	EHI_178560	4	8	DISCRETE	487
C4LVS8	C4LVS8_ENTHI	Rho GTPase activating protein, putative	EHI_187110	6	8	DISCRETE	965
C4M3F3	C4M3F3_ENTHI	Ribosomal protein L13, putative	EHI_017700	5	8	DIFFERENTIABLE	122
C4M2E4	C4M2E4_ENTHI	T-complex protein 1 gamma subunit, putative	EHI_158250	5	8	DISCRETE	201
B1N2H1	B1N2H1_ENTHI	T-complex protein 1 subunit eta, putative	EHI_044940	5	8	EQUIVALENT	12	C4M759
C4M944	C4M944_ENTHI	Uncharacterized protein	EHI_083600	3	8	DISCRETE	905
C4LWE7	C4LWE7_ENTHI	Uncharacterized protein	EHI_096340	4	8	EQUIVALENT	983	S0AVB8, S0AZQ2
C4LWP4	C4LWP4_ENTHI	Uncharacterized protein	EHI_069560	5	8	DISCRETE	183
C4MAK2	C4MAK2_ENTHI	Uncharacterized protein	EHI_017000	4	8	DIFFERENTIABLE	430
Q1EPY8	Q1EPY8_ENTHI	V-SNARE protein VampD3	EHI_081370	3	8	DISCRETE	169
C4M8D7	C4M8D7_ENTHI	26S protease regulatory subunit, putative	EHI_185410	4	7	SUPERSET	382
C4M3C0	C4M3C0_ENTHI	26S protease regulatory subunit, putative	EHI_053020	4	7	DIFFERENTIABLE	382
C4LTQ5	C4LTQ5_ENTHI	40S ribosomal protein S3a	EHI_050280	4	7	SUPERSET	315	S0AZ77, S0B1H3
C4M4I3	C4M4I3_ENTHI	60S acidic ribosomal protein P2, putative	EHI_138770	4	7	DIFFERENTIABLE	975
C4LX05	C4LX05_ENTHI	60S ribosomal protein L17, putative	EHI_127330	3	7	EQUIVALENT	337	C4M0M6
C4LVB0	C4LVB0_ENTHI	60S ribosomal protein L23, putative	EHI_196920	3	7	DISCRETE	84
C4M569	C4M569_ENTHI	60S ribosomal protein L26, putative	EHI_111570	3	7	DIFFERENTIABLE	969
B1N302	B1N302_ENTHI	70 kDa peptidyl-prolyl isomerase, putative	EHI_051870	3	7	EQUIVALENT	720	C4LUU9
C4M8S6	C4M8S6_ENTHI	Acid phosphatase, putative	EHI_146950	4	7	DISCRETE	747
Q1EQ27	Q1EQ27_ENTHI	Beta subunit isoform a	EHI_023600	4	7	DISCRETE	497
C4M472	C4M472_ENTHI	Deoxycytidine triphosphate deaminase, putative	EHI_140240	4	7	DISCRETE	776
C4LSV2	C4LSV2_ENTHI	EH-domain containing protein, putative	EHI_152680	4	7	DIFFERENTIABLE	19
C4MAK5	C4MAK5_ENTHI	Eukaryotic translation initiation factor 3 subunit G	EHI_017030	5	7	DISCRETE	1115
C4M2Q1	C4M2Q1_ENTHI	Eukaryotic translation initiation factor 6, putative	EHI_006170	5	7	DISCRETE	360
Q769I7	Q769I7_ENTHI	NifS/IscS-related protein	EhnifS	4	7	EQUIVALENT	813	S0AVH9
Q5FZP2	Q5FZP2_ENTHI	p21-activated kinase	EHI_148280	3	7	DIFFERENTIABLE	464
C4LXT6	C4LXT6_ENTHI	Phosphoribulokinase /uridine kinase family protein	EHI_087540	3	7	DISCRETE	512
C4M363	C4M363_ENTHI	Proteasome alpha subunit, putative	EHI_086080	3	7	DISCRETE	549
C4M9X3	C4M9X3_ENTHI	Protein phosphatase family protein	EHI_179330	5	7	DIFFERENTIABLE	479
C4M4A8	C4M4A8_ENTHI	Protein transport protein SEC61 gamma subunit, putative	EHI_048170	2	7	DISCRETE	481
C4LXG1	C4LXG1_ENTHI	Purine nucleoside phosphorylase, putative	EHI_130930	3	7	EQUIVALENT	572	S0AZI4
C4LSR0	C4LSR0_ENTHI	Putative uncharacterized protein	EHI_152220	4	7	DIFFERENTIABLE	942
C4LZJ6	C4LZJ6_ENTHI	Putative uncharacterized protein	EHI_124620	4	7	DISCRETE	704
B1N3X3	B1N3X3_ENTHI	Putative uncharacterized protein	EHI_117690	4	7	DISCRETE	784
C4LUX3	C4LUX3_ENTHI	Putative uncharacterized protein	EHI_092080	3	7	DISCRETE	625
C4LWQ4	C4LWQ4_ENTHI	Putative uncharacterized protein	EHI_198580	4	7	DISCRETE	353
C4M2W9	C4M2W9_ENTHI	Putative uncharacterized protein	EHI_048560	4	7	DIFFERENTIABLE	23
C4LZJ5	C4LZJ5_ENTHI	Ras family GTPase	EHI_124610	4	7	EQUIVALENT	388	Q24807
Q24806	Q24806_ENTHI	Ras homologue 1	Ehras1	4	7	DIFFERENTIABLE	388
B1N354	B1N354_ENTHI	Ras-1, putative	EHI_124520	4	7	DISCRETE	760
C4LV64	C4LV64_ENTHI	Ribosomal protein L23A, putative	EHI_182850	2	7	EQUIVALENT	379	Q9XYW0
C4M036	C4M036_ENTHI	UDP-N-acetylglucosamine pyrophosphorylase, putative	EHI_021200	5	7	EQUIVALENT	990	C4MA87
C4LUB6	C4LUB6_ENTHI	Uncharacterized protein	EHI_110690	3	7	DISCRETE	1305
C4M399	C4M399_ENTHI	Vacuolar ATP synthase subunit d, putative	EHI_106350	3	7	DISCRETE	496
C4LYM0	C4LYM0_ENTHI	WD domain containing protein	EHI_118720	4	7	DISCRETE	970
C4LY36	C4LY36_ENTHI	26s proteasome subunit P45 family protein, putative	EHI_177320	3	6	DISCRETE	829
C4LVN9	C4LVN9_ENTHI	40S ribosomal protein S12	EHI_186720	2	6	DIFFERENTIABLE	462
C4M0C6	C4M0C6_ENTHI	40S ribosomal protein S15, putative	EHI_064570	3	6	EQUIVALENT	902	C4M7H3
C4LSU3	C4LSU3_ENTHI	60S ribosomal protein L26, putative	EHI_152570	3	6	DIFFERENTIABLE	969
B1N4V3	B1N4V3_ENTHI	60S ribosomal protein L35a, putative	EHI_025590	5	6	DISCRETE	593
C4M758	C4M758_ENTHI	Alpha-NAC protein, putative	EHI_083250	3	6	EQUIVALENT	76	S0AX48
C4LWW8	C4LWW8_ENTHI	Asparaginyl-tRNA synthetase, putative	EHI_126920	4	6	DISCRETE	98
S0AV91	S0AV91_ENTHI	Cysteine proteinase 1, putative		4	6	DIFFERENTIABLE	195
C4M8V1	C4M8V1_ENTHI	Cysteinyl-tRNA synthetase, putative	EHI_169700	3	6	DISCRETE	826
Q1EQ50	Q1EQ50_ENTHI	EhSec23A	EHI_008730	3	6	DISCRETE	419
C4MB90	C4MB90_ENTHI	Helix-turn-helix protein, putative	EHI_093330	3	6	DISCRETE	1480
C4LYI2	HIT_ENTHI	Histidine triad nucleotide-binding protein	EHI_093910	4	6	DISCRETE	492
C4M3Z2	C4M3Z2_ENTHI	Long-chain-fatty-acid--CoA ligase, putative	EHI_185240	4	6	DISCRETE	1180
C4M2G9	C4M2G9_ENTHI	Prolyl-tRNA synthetase, putative	EHI_040400	4	6	DISCRETE	234
C4M648	C4M648_ENTHI	Proteasome regulatory subunit, putative	EHI_179970	1	6	DISCRETE	941
C4M451	C4M451_ENTHI	Proteasome regulatory subunit, putative	EHI_030170	3	6	DISCRETE	412
C4M854	C4M854_ENTHI	Proteasome subunit alpha type	EHI_052140	2	6	DISCRETE	44
C4LVP9	C4LVP9_ENTHI	Protein kinase domain containing protein	EHI_186820	3	6	DIFFERENTIABLE	621
C4LVM3	C4LVM3_ENTHI	Protein kinase, putative	EHI_103810	4	6	DIFFERENTIABLE	63
C4M417	C4M417_ENTHI	Putative uncharacterized protein	EHI_195140	2	6	DISCRETE	148
C4LY23	C4LY23_ENTHI	Putative uncharacterized protein	EHI_176980	4	6	DIFFERENTIABLE	246
C4LZY7	C4LZY7_ENTHI	Putative uncharacterized protein	EHI_065710	3	6	DISCRETE	29
C4M015	C4M015_ENTHI	Putative uncharacterized protein	EHI_134660	2	6	EQUIVALENT	691	S0AVE6
C4LY32	C4LY32_ENTHI	Putative uncharacterized protein	EHI_177180	4	6	DISCRETE	545
C4M2N2	C4M2N2_ENTHI	Putative uncharacterized protein	EHI_005970	4	6	DISCRETE	708
C4M051	C4M051_ENTHI	Putative uncharacterized protein	EHI_021360	2	6	DISCRETE	15
C4M2S1	C4M2S1_ENTHI	Putative uncharacterized protein	EHI_161040	3	6	DISCRETE	243
C4M859	C4M859_ENTHI	Putative uncharacterized protein	EHI_052040	2	6	EQUIVALENT	1222	C4MAD5
C4M2M6	C4M2M6_ENTHI	Rho guanine nucleotide exchange factor, putative	EHI_005910	5	6	DISCRETE	707
C4LW10	C4LW10_ENTHI	Ribosomal protein S29, putative	EHI_030070	3	6	EQUIVALENT	530	O15619
C4LU03	C4LU03_ENTHI	Serine carboxypeptidase (S28) family protein	EHI_068090	2	6	DISCRETE	949
C4LWT3	C4LWT3_ENTHI	Transcription factor BTF3, putative	EHI_198870	3	6	DIFFERENTIABLE	23
C4LU94	C4LU94_ENTHI	Tryptophanyl-tRNA synthetase, putative	EHI_110420	3	6	EQUIVALENT	144	C4M7U9
C4M7T9	C4M7T9_ENTHI	Ubiquitin-activating enzyme, putative	EHI_020270	4	6	DIFFERENTIABLE	627
C4LT93	C4LT93_ENTHI	UMP-CMP kinase, putative	EHI_044740	4	6	DISCRETE	821
S0AXJ4	S0AXJ4_ENTHI	Uncharacterized protein		3	6	DIFFERENTIABLE	1190
C4LSI0	C4LSI0_ENTHI	Uncharacterized protein	EHI_151380	3	6	DISCRETE	946
C4LV36	C4LV36_ENTHI	Vacuolar ATP synthase subunit E, putative	EHI_182550	4	6	DISCRETE	443
Q6Y0Y5	Q6Y0Y5_ENTHI	Vacuolar protein sorting 35	Vps35-1	2	6	DISCRETE	165
C4M1W8	C4M1W8_ENTHI	26S proteasome non-ATPase regulatory subunit 14, putative	EHI_164750	3	5	DISCRETE	1265
C4M5B7	C4M5B7_ENTHI	40S ribosomal protein S23, putative	EHI_020310	3	5	DISCRETE	1215
C4M8F6	C4M8F6_ENTHI	40S ribosomal protein S27a, putative	EHI_036530	2	5	DISCRETE	178
C4M059	C4M059_ENTHI	40S ribosomal protein S28, putative	EHI_021450	3	5	DIFFERENTIABLE	227
C4M0M9	C4M0M9_ENTHI	60S ribosomal protein L37a, putative	EHI_008650	2	5	DIFFERENTIABLE	883
B1N384	B1N384_ENTHI	60S ribosomal protein L4, putative	EHI_064710	2	5	SUPERSET	68	S0AYF5, S0B2U7
S0AY83	S0AY83_ENTHI	60S ribosomal protein L4, putative		2	5	DIFFERENTIABLE	68
C4LZA2	C4LZA2_ENTHI	60S ribosomal protein L4, putative	EHI_000510	2	5	DIFFERENTIABLE	68
S0AWM8	S0AWM8_ENTHI	60S ribosomal protein L4, putative		2	5	SUPERSET	68
C4LXE4	C4LXE4_ENTHI	Autophagy-related protein	EHI_130660	3	5	DIFFERENTIABLE	586
C4MBI6	C4MBI6_ENTHI	Calcineurin B subunit, putative	EHI_106670	3	5	DISCRETE	1473
C4LY22	C4LY22_ENTHI	Cdc48-like protein, putative	EHI_176970	3	5	DIFFERENTIABLE	368
C4M307	C4M307_ENTHI	Cysteine proteinase 1, putative	EHI_074180	3	5	SUPERSET	195	Q01957, S0AV81, S0AV92, S0AW39, S0AW79, S0AW85, S0AWI9, S0AWZ7, S0AXQ6, S0AYY3, S0AZB3, S0AZR5
Q95030	Q95030_ENTHI	Cysteine proteinase, putative	CP5	2	5	SUPERSET	431	S0AUZ5, S0AW83, S0AXA6, S0AXD8, S0AXX8, S0AZ47, S0B0T6
Q6AW64	Q6AW64_ENTHI	EhRab7E protein	EhRAB7E	2	5	DIFFERENTIABLE	188
B1N5W3	B1N5W3_ENTHI	Glycogenphosphorylase, putative	EHI_129000	2	5	DIFFERENTIABLE	216
Q8WR14	Q8WR14_ENTHI	Hydroxylamine reductase, putative	HCP	3	5	DISCRETE	599
C4M982	C4M982_ENTHI	Inorganic pyrophosphatase, putative	EHI_124880	3	5	DISCRETE	669
C4M0K6	C4M0K6_ENTHI	Leucine-rich repeat containing protein	EHI_024640	3	5	DISCRETE	450
C4M6N7	C4M6N7_ENTHI	LIM zinc finger domain containing protein	EHI_161940	3	5	DISCRETE	344
C4M4W9	C4M4W9_ENTHI	Long-chain-fatty-acid--CoA ligase, putative	EHI_029050	4	5	DISCRETE	592
C4LXA4	C4LXA4_ENTHI	Lysine and glutamic acid-rich protein 1 (KERP1)	EHI_098210	2	5	DISCRETE	453
C4MAS9	C4MAS9_ENTHI	Methionine gamma-lyase	EHI_144610	2	5	SUPERSET	436	S0AW11
Q1EQ15	Q1EQ15_ENTHI	Mu subunit isoform a	EHI_099240	3	5	EQUIVALENT	791	S0AW98
C4M162	C4M162_ENTHI	NADP-dependent alcohol dehydrogenase, putative	EHI_107210	2	5	EQUIVALENT	1122	S0AWL2
Q24809	Q24809_ENTHI	P-glycoprotein 6	EhPGP6	5	5	DIFFERENTIABLE	429
C4LVS1	C4LVS1_ENTHI	Phosphofructokinase, putative	EHI_187040	4	5	DIFFERENTIABLE	778
C4M3X0	C4M3X0_ENTHI	Plasma membrane calcium-transporting ATPase, putative	EHI_016480	3	5	DIFFERENTIABLE	547
C4M1F1	C4M1F1_ENTHI	Plasma membrane calcium-transporting ATPase, putative	EHI_030830	3	5	DISCRETE	1343
C4LYX6	C4LYX6_ENTHI	Pleckstrin homology (PH) domain containing protein	EHI_117920	3	5	SUPERSET	999	S0AXI1
C4M4F3	C4M4F3_ENTHI	Proteasome beta subunit, putative	EHI_078710	3	5	DISCRETE	1295
C4M2R9	C4M2R9_ENTHI	Putative uncharacterized protein	EHI_161020	2	5	DISCRETE	595
C4M7U5	C4M7U5_ENTHI	Putative uncharacterized protein	EHI_020330	3	5	DISCRETE	1128
C4LY34	C4LY34_ENTHI	Putative uncharacterized protein	EHI_177300	3	5	DISCRETE	162
C4M1U7	C4M1U7_ENTHI	Putative uncharacterized protein	EHI_027610	3	5	DISCRETE	276
C4M8M7	C4M8M7_ENTHI	Putative uncharacterized protein	EHI_114320	3	5	DISCRETE	113
C4M8G6	C4M8G6_ENTHI	Replication factor A protein 1, putative	EHI_062980	3	5	DISCRETE	1211
C4M3D4	C4M3D4_ENTHI	RNA-binding protein, putative	EHI_053170	3	5	EQUIVALENT	1108	S0AWK1
C4M8C7	C4M8C7_ENTHI	S phingosine-1-phosphate lyase 1, putative	EHI_039350	4	5	DISCRETE	214
C4M4L8	C4M4L8_ENTHI	Small GTPase Sar1	EHI_031410	3	5	DIFFERENTIABLE	190
Q8MZU6	Q8MZU6_ENTHI	Small heat shock protein	HSP16	2	5	DISCRETE	1436
C4M3J8	C4M3J8_ENTHI	START domain containing protein	EHI_109680	3	5	DIFFERENTIABLE	605
C4M2S8	C4M2S8_ENTHI	Steroid 5-alpha reductase, putative	EHI_076870	3	5	DISCRETE	274
C4LVF0	C4LVF0_ENTHI	Sulfotransferase, putative	EHI_197340	3	5	DISCRETE	929
C4LVL5	C4LVL5_ENTHI	Threonyl-tRNA synthetase, putative	EHI_103730	3	5	DISCRETE	386
C4LX06	C4LX06_ENTHI	Translation initiation factor IF-2, putative	EHI_127340	4	5	DISCRETE	588
C4M3F2	C4M3F2_ENTHI	Uncharacterized protein	EHI_017690	3	5	DISCRETE	915
S0AW96	S0AW96_ENTHI	Uncharacterized protein		3	5	DIFFERENTIABLE	187
C4LZR0	C4LZR0_ENTHI	WD repeat protein	EHI_038880	3	5	DIFFERENTIABLE	181
B1N3H6	B1N3H6_ENTHI	3-phosphoinositide-dependent protein kinase 1, putative	EHI_006200	3	4	EQUIVALENT	1018	C4M3E9
C4LVC0	C4LVC0_ENTHI	40S ribosomal protein S10, putative	EHI_197030	2	4	DISCRETE	460
S0AWL1	S0AWL1_ENTHI	40S ribosomal protein S12		1	4	DIFFERENTIABLE	462
C4LZQ8	C4LZQ8_ENTHI	40S ribosomal protein S28, putative	EHI_038860	2	4	DIFFERENTIABLE	227
C4M1J9	C4M1J9_ENTHI	4-alpha-glucanotransferase, putative	EHI_084680	2	4	DISCRETE	328
C4LVQ0	C4LVQ0_ENTHI	60S acidic ribosomal protein P2, putative	EHI_186830	3	4	DIFFERENTIABLE	975
B1N5B7	B1N5B7_ENTHI	Acetyltransferase, putative	EHI_122100	3	4	SUPERSET	680
Q5MAR2	Q5MAR2_ENTHI	Aldose 1-epimerase	EHI_094090	3	4	EQUIVALENT	1016	S0AXS2, S0AZZ4
C4LX00	C4LX00_ENTHI	Aminoacyl-histidine dipeptidase, putative	EHI_127280	3	4	DISCRETE	1430
B1N459	B1N459_ENTHI	ATP-binding cassette protein, putative	EHI_047760	3	4	DISCRETE	847
C4LY16	C4LY16_ENTHI	Calcium binding family protein	EHI_177620	3	4	DIFFERENTIABLE	273
O15782	O15782_ENTHI	Chaperonin 60	cpn60	2	4	DIFFERENTIABLE	579
C4M6U0	C4M6U0_ENTHI	Dolichol monophosphate mannose synthase, putative	EHI_054260	3	4	EQUIVALENT	1264	S0B0U1
C4M0A4	C4M0A4_ENTHI	Eukaryotic translation initiation factor 2 alpha subunit, putative	EHI_005100	2	4	DISCRETE	375
C4M6P6	C4M6P6_ENTHI	Guanine nucleotide-binding protein subunit beta 2-like 1, putative	EHI_171280	3	4	DIFFERENTIABLE	1326
C4MA08	C4MA08_ENTHI	HEAT repeat domain containing protein	EHI_146520	2	4	DISCRETE	138
C4M5K9	C4M5K9_ENTHI	Heat shock protein 70 family	EHI_001950	3	4	DISCRETE	160
C4LTF9	C4LTF9_ENTHI	High mobility group (HMG) box domain containing protein	EHI_045480	2	4	DISCRETE	1471
C4MAF8	C4MAF8_ENTHI	Leucine rich repeat / protein phosphatase 2C domain containing protein	EHI_167290	3	4	DISCRETE	470
C4M8C0	C4M8C0_ENTHI	Long-chain-fatty-acid--CoA ligase, putative	EHI_188590	2	4	DISCRETE	1075
Q7Z0T4	Q7Z0T4_ENTHI	Longin-type vesicle-associated membrane protein, putative	SYBL2	1	4	DISCRETE	392
C4LUA1	C4LUA1_ENTHI	NADPH-dependent oxidoreductase	EhNO1	4	4	DIFFERENTIABLE	135
C4LXC0	C4LXC0_ENTHI	Orn/Arg/Lys decarboxylase, putative	EHI_098380	2	4	DISCRETE	1268
C4M828	C4M828_ENTHI	Phenylalanyl-tRNA synthetase beta subunit, putative	EHI_002130	2	4	DISCRETE	207
C4M878	C4M878_ENTHI	Protein phosphatase regulatory subunit, putative	EHI_098850	2	4	EQUIVALENT	761	S0B2C2
Q27642	Q27642_ENTHI	Putative plasma membrane calcium ion-transporting ATPase		2	4	DIFFERENTIABLE	547
C4M3V7	C4M3V7_ENTHI	Putative uncharacterized protein	EHI_016350	2	4	DISCRETE	795
C4LY53	C4LY53_ENTHI	Putative uncharacterized protein	EHI_177500	2	4	DISCRETE	1094
C4LZG8	C4LZG8_ENTHI	Putative uncharacterized protein	EHI_138080	2	4	DISCRETE	973
C4M5S0	C4M5S0_ENTHI	Putative uncharacterized protein	EHI_070680	2	4	EQUIVALENT	816	S0AWF6, S0AYV5
B1N2Z1	B1N2Z1_ENTHI	Putative uncharacterized protein	EHI_035730	3	4	DISCRETE	676
B1N4G2	B1N4G2_ENTHI	Putative uncharacterized protein	EHI_187800	3	4	DIFFERENTIABLE	199
C4M2E1	C4M2E1_ENTHI	Putative uncharacterized protein	EHI_158220	3	4	DISCRETE	217
C4M8N0	C4M8N0_ENTHI	Putative uncharacterized protein	EHI_114350	2	4	DISCRETE	506
C4M3E2	C4M3E2_ENTHI	Putative uncharacterized protein	EHI_095850	2	4	DIFFERENTIABLE	800
C4M533	C4M533_ENTHI	Putative uncharacterized protein	EHI_128150	1	4	DISCRETE	587
C4LVM8	C4LVM8_ENTHI	Putative uncharacterized protein	EHI_103860	2	4	DISCRETE	425
C4M1L5	C4M1L5_ENTHI	Putative uncharacterized protein	EHI_085050	2	4	DISCRETE	361
C4M717	C4M717_ENTHI	Rab family GTPase	EHI_189990	2	4	EQUIVALENT	188	Q6AW66
C4M2S0	C4M2S0_ENTHI	Rab family GTPase	EHI_161030	2	4	EQUIVALENT	526	Q9BLE3
C4M081	C4M081_ENTHI	Ras family GTPase	EHI_004860	2	4	DISCRETE	239
C4M855	C4M855_ENTHI	Rho family GTPase	EHI_052150	2	4	DIFFERENTIABLE	5
C4M5T0	C4M5T0_ENTHI	Rho family GTPase	EHI_070730	3	4	EQUIVALENT	89	Q24816
B1N444	B1N444_ENTHI	Ribosomal protein L13A, putative	EHI_200090	3	4	EQUIVALENT	122	C4M8M3
B1N378	B1N378_ENTHI	S-adenosylmethionine synthase	EHI_004920	2	4	EQUIVALENT	1583	B1N3M4, C4M272
C4M6M6	C4M6M6_ENTHI	Serine/threonine-protein phosphatase	EHI_147500	3	4	DISCRETE	376
C4LWV7	C4LWV7_ENTHI	Serine/threonine-protein phosphatase	EHI_199120	2	4	DISCRETE	664
Q5NT17	Q5NT17_ENTHI	Small GTPase EhRabM1	EhRabM1	3	4	DISCRETE	131
C4LVL3	C4LVL3_ENTHI	Soluble calcium-activated nucleotidase 1, putative	EHI_103690	3	4	EQUIVALENT	395	S0AZ15
C4LU87	C4LU87_ENTHI	Thioredoxin, putative	EHI_110350	2	4	DISCRETE	736
C4M571	C4M571_ENTHI	Tryptophanase, putative	EHI_111610	3	4	DISCRETE	364
C4M6I7	C4M6I7_ENTHI	Uncharacterized protein	EHI_173480	3	4	DISCRETE	541
Q53UB0	Q53UB0_ENTHI	Vacuolar sorting protein 26, putative	EhVPS26	3	4	DIFFERENTIABLE	1027
C4M431	C4M431_ENTHI	Valyl-tRNA synthetase, putative	EHI_033680	2	4	SUPERSET	167
Q1EPY9	Q1EPY9_ENTHI	Vesicle-associated membrane protein, putative	EHI_170630	2	4	DISCRETE	1111
C4M6Y3	C4M6Y3_ENTHI	20 kDa antigen, putative	EHI_056490	1	3	DISCRETE	1236
C4M285	C4M285_ENTHI	26S protease regulatory subunit, putative	EHI_180350	2	3	DISCRETE	275
C4M7A5	C4M7A5_ENTHI	40S ribosomal protein S15, putative	EHI_046690	2	3	DIFFERENTIABLE	902
C4LWW3	C4LWW3_ENTHI	40S ribosomal protein S21	EHI_126870	2	3	DISCRETE	663
C4M8R8	C4M8R8_ENTHI	60S ribosomal protein L13, putative	EHI_181560	2	3	SUPERSET	403
C4M0P2	C4M0P2_ENTHI	Actin, putative	EHI_008780	2	3	DISCRETE	1207
B1N2V8	B1N2V8_ENTHI	Adaptor protein (AP) family protein	EHI_013040	3	3	DISCRETE	520
C4LW96	C4LW96_ENTHI	Chaperonin containing TCP-1 epsilon subunit, putative	EHI_155450	3	3	DISCRETE	824
C4LU38	C4LU38_ENTHI	COP9 signalosome subunit, putative	EHI_068470	2	3	DISCRETE	804
C4M474	C4M474_ENTHI	Copine, putative	EHI_140260	3	3	DISCRETE	11
C4M0I4	C4M0I4_ENTHI	D-hydantoinase, putative	EHI_024420	2	3	DISCRETE	645
C4LV53	C4LV53_ENTHI	Dipeptidyl-peptidase, putative	EHI_182720	2	3	DISCRETE	391
C4MAB3	C4MAB3_ENTHI	DNA-directed RNA polymerase	EHI_186020	2	3	DISCRETE	898
Q1EPZ6	Q1EPZ6_ENTHI	EhSyntaxin H	EHI_116720	1	3	DISCRETE	989
Q5EHP7	Q5EHP7_ENTHI	G protein-coupled receptor 1	EHI_025100	1	3	DISCRETE	25
C4LSM1	C4LSM1_ENTHI	Ganglioside gm2 activator protein, putative	EHI_151800	2	3	DISCRETE	690
C4LYH1	C4LYH1_ENTHI	High mobility group (HMG) box domain containing protein	EHI_093800	1	3	DISCRETE	1004
C4M9B6	C4M9B6_ENTHI	I/LWEQ domain protein	EHI_003930	2	3	DISCRETE	1149
C4M3J0	C4M3J0_ENTHI	Iron-sulfur flavoprotein, putative	EHI_138480	2	3	DIFFERENTIABLE	616
C4MBQ9	C4MBQ9_ENTHI	Leucine rich repeat protein, BspA family	EHI_015120	3	3	SUPERSET	59	S0AX85, S0B2D4
C4LXL8	C4LXL8_ENTHI	Leucine-rich repeat containing protein	EHI_073580	2	3	DISCRETE	1011
C4M989	C4M989_ENTHI	Leucine-rich repeat containing protein	EHI_119950	3	3	DISCRETE	665
C4M520	C4M520_ENTHI	Long-chain-fatty-acid--CoA ligase, putative	EHI_127830	2	3	DISCRETE	692
B1N3U1	B1N3U1_ENTHI	P-glycoprotein 6, putative	EHI_081130	3	3	DIFFERENTIABLE	429
B1N569	B1N569_ENTHI	Predicted protein	EHI_201420	2	3	DIFFERENTIABLE	187
C4M4A2	C4M4A2_ENTHI	Proteasome subunit alpha type	EHI_098060	1	3	EQUIVALENT	564	C4MAW8, S0AWR8
C4LU84	C4LU84_ENTHI	Protein phosphatase, putative	EHI_110320	2	3	DISCRETE	1000
C4MAV9	C4MAV9_ENTHI	Purine nucleoside phosphorylase, putative	EHI_012720	2	3	DISCRETE	958
C4M5B9	C4M5B9_ENTHI	Putative uncharacterized protein	EHI_121720	1	3	DISCRETE	52
C4M143	C4M143_ENTHI	Putative uncharacterized protein	EHI_107020	1	3	DISCRETE	602
C4M5R2	C4M5R2_ENTHI	Putative uncharacterized protein	EHI_129960	1	3	DISCRETE	1774
C4MAY3	C4MAY3_ENTHI	Putative uncharacterized protein	EHI_167480	2	3	DISCRETE	651
C4M3L1	C4M3L1_ENTHI	Putative uncharacterized protein	EHI_109920	2	3	DISCRETE	1297
C4M186	C4M186_ENTHI	Putative uncharacterized protein	EHI_188120	2	3	DISCRETE	288
C4M8L9	C4M8L9_ENTHI	Putative uncharacterized protein	EHI_090430	3	3	DISCRETE	307
C4LYA4	C4LYA4_ENTHI	Putative uncharacterized protein	EHI_167020	2	3	DISCRETE	590
C4M0E0	C4M0E0_ENTHI	Putative uncharacterized protein	EHI_006550	2	3	DISCRETE	1158
C4MAN6	C4MAN6_ENTHI	Putative uncharacterized protein	EHI_016130	2	3	DISCRETE	319
C4LXC1	C4LXC1_ENTHI	Putative uncharacterized protein	EHI_098390	2	3	DISCRETE	786
C4M0I0	C4M0I0_ENTHI	Putative uncharacterized protein	EHI_024350	1	3	DISCRETE	126
C4LY33	C4LY33_ENTHI	Putative uncharacterized protein	EHI_177190	2	3	DISCRETE	339
C4MA90	C4MA90_ENTHI	Putative uncharacterized protein	EHI_039860	2	3	DISCRETE	4
Q6AW65	Q6AW65_ENTHI	Rab family GTPase	EhRAB7D	2	3	DISCRETE	895
Q9BLF0	Q9BLF0_ENTHI	Rab family GTPase	EhRab21	1	3	DISCRETE	1682
Q6AW67	Q6AW67_ENTHI	Rab family GTPase	EhRAB7B	2	3	DISCRETE	1195
Q5NSY5	Q5NSY5_ENTHI	Rab family GTPase	EhRabX31	2	3	DISCRETE	438
C4LSH0	C4LSH0_ENTHI	Rap/Ran GTPase activating protein, putative	EHI_151270	1	3	DISCRETE	874
C4M1X2	C4M1X2_ENTHI	RhoGAP domain containing protein	EHI_164790	1	3	DISCRETE	1492
C4LTA0	C4LTA0_ENTHI	Ribosomal protein L10, putative	EHI_044810	3	3	SUPERSET	738	Q8MTT4, S0AW47
Q8WQH7	Q8WQH7_ENTHI	Serine-threonine protein kinase PK2	EHI_004790	2	3	SUPERSET	833	S0AWP0
Q5NSZ9	Q5NSZ9_ENTHI	Small GTPase EhRabX17	EhRabX17	1	3	DISCRETE	706
Q963D1	Q963D1_ENTHI	Small GTP-binding protein Rab8	rab8	2	3	DIFFERENTIABLE	277
C4M0Y3	C4M0Y3_ENTHI	S-phase kinase-associated protein 1A, putative	EHI_134960	3	3	DISCRETE	844
C4LVH2	C4LVH2_ENTHI	T-complex protein 1 beta subunit, putative	EHI_103270	3	3	DISCRETE	525
C4LUP1	C4LUP1_ENTHI	TPR repeat protein	EHI_023300	1	3	DISCRETE	1140
C4LSD9	C4LSD9_ENTHI	Translation initiation factor 2 beta subunit, putative	EHI_153480	2	3	DISCRETE	1423
C4LX61	C4LX61_ENTHI	Type A flavoprotein, putative	EHI_159860	1	3	DISCRETE	226
C4M1C8	C4M1C8_ENTHI	Ubiquitin-like protein	EHI_170060	2	3	DISCRETE	1444
C4M0J5	C4M0J5_ENTHI	Uncharacterized protein	EHI_024530	2	3	EQUIVALENT	1418	S0AWD7, S0AWR6
C4M7U7	C4M7U7_ENTHI	Uncharacterized protein	EHI_020350	1	3	DISCRETE	764
C4LYQ0	C4LYQ0_ENTHI	Uncharacterized protein	EHI_004370	2	3	SUPERSET	648	Q24843, S0B1P3
C4M041	C4M041_ENTHI	Villidin, putative	EHI_021260	2	3	DISCRETE	1234
C4M042	C4M042_ENTHI	Villidin, putative	EHI_021270	2	3	DISCRETE	852
C4LYM6	C4LYM6_ENTHI	WD domain containing protein	EHI_118780	2	3	DISCRETE	432
C4LWU1	C4LWU1_ENTHI	WD-repeat protein	EHI_198950	2	3	DIFFERENTIABLE	181
C4M9M6	C4M9M6_ENTHI	3-ketoacyl-CoA synthase	EHI_112870	1	2	DISCRETE	69
C4LSC4	C4LSC4_ENTHI	40S ribosomal protein S12, putative	EHI_153330	1	2	DIFFERENTIABLE	462
C4M5V7	C4M5V7_ENTHI	40S ribosomal protein S20, putative	EHI_026410	2	2	DIFFERENTIABLE	566
C4M466	C4M466_ENTHI	40S ribosomal protein S20, putative	EHI_140170	2	2	DIFFERENTIABLE	566
B1N420	B1N420_ENTHI	60S ribosomal protein L27a, putative	EHI_192090	2	2	EQUIVALENT	55	Q9BI14
B1N3F8	B1N3F8_ENTHI	60S ribosomal protein L27a, putative	EHI_069490	2	2	SUPERSET	55	Q9BH80
C4LU13	C4LU13_ENTHI	60S ribosomal protein L31, putative	EHI_068200	1	2	DIFFERENTIABLE	613
C4LZH1	C4LZH1_ENTHI	60S ribosomal protein L36, putative	EHI_199940	2	2	DIFFERENTIABLE	1319
C4M8M9	C4M8M9_ENTHI	Acetylornithine deacetylase, putative	EHI_114340	1	2	EQUIVALENT	1447	S0AWT9, S0B151
Q9U3Z8	Q9U3Z8_ENTHI	Actinin-like protein	ALP	1	2	DIFFERENTIABLE	284
C4LYU3	C4LYU3_ENTHI	Acyl-CoA synthetase, putative	EHI_010560	1	2	DISCRETE	444
C4LUT1	C4LUT1_ENTHI	Aldose reductase, putative	EHI_178670	1	2	DISCRETE	1777
C4LW73	C4LW73_ENTHI	Ankyrin repeat protein, putative	EHI_155190	1	2	DISCRETE	850
C4M021	C4M021_ENTHI	Ankyrin repeat protein, putative	EHI_134720	2	2	DISCRETE	617
C4LX08	C4LX08_ENTHI	Anti-silencing protein, putative	EHI_127360	1	2	DISCRETE	546
C4MBI8	C4MBI8_ENTHI	Aspartyl aminopeptidase, putative	EHI_106690	2	2	EQUIVALENT	656	S0AYF2
C4M3T5	C4M3T5_ENTHI	B-keto acyl reductase, putative	EHI_163540	1	2	DISCRETE	1047
B1N3W3	B1N3W3_ENTHI	Calcium-dependent protein kinase 2, putative	EHI_137120	2	2	EQUIVALENT	324	C4LZF9, Q761X0
C4M9C0	C4M9C0_ENTHI	Calpain large subunit domain III containing protein	EHI_146330	1	2	DISCRETE	1511
C4LXK3	C4LXK3_ENTHI	Carbonic anhydrase, putative	EHI_073380	1	2	DISCRETE	1403
C4LSN4	C4LSN4_ENTHI	Casein kinase, putative	EHI_151950	1	2	DISCRETE	1063
C4M7I1	C4M7I1_ENTHI	CXXC-rich protein	EHI_111990	1	2	DISCRETE	781
B1N5G3	B1N5G3_ENTHI	Cysteine proteinase, putative	EHI_010850	1	2	EQUIVALENT	1218	Q8I8E0
C4LZ08	C4LZ08_ENTHI	Diaphanous protein, homolog 1, putative	EHI_118260	1	2	DISCRETE	853
C4M1G6	C4M1G6_ENTHI	Diaphanous protein, homolog 1, putative	EHI_192460	1	2	DISCRETE	1617
C4LVH1	C4LVH1_ENTHI	Diaphanous protein, homolog 2, putative	EHI_197550	1	2	DISCRETE	1294
C4LUC2	C4LUC2_ENTHI	Dipeptidyl-peptidase III, putative	EHI_110750	2	2	DISCRETE	931
C4LWZ7	C4LWZ7_ENTHI	Diphthine synthase, putative	EHI_127240	1	2	DISCRETE	1667
C4LSG9	C4LSG9_ENTHI	DnaJ family protein	EHI_151260	2	2	DISCRETE	825
C4LX84	C4LX84_ENTHI	Dynamin-1-like protein, putative	EHI_013180	2	2	DIFFERENTIABLE	94
Q6AW62	Q6AW62_ENTHI	EhRab7G protein	EhRAB7G	1	2	DIFFERENTIABLE	277
C4LSV8	C4LSV8_ENTHI	Eukaryotic peptide chain release factor subunit 1, putative	EHI_152750	1	2	DISCRETE	1767
B1N3S0	B1N3S0_ENTHI	Fumarate hydratase class I, anaerobic, putative	EHI_035060	1	2	EQUIVALENT	1302	C4MB76
C4LZ32	C4LZ32_ENTHI	Gelsolin repeat protein, putative	EHI_009570	1	2	DISCRETE	1739
B1N401	B1N401_ENTHI	Glycoprotein FP21, putative	EHI_065310	2	2	DISCRETE	888
C4M463	C4M463_ENTHI	Gtpase activating protein, putative	EHI_140140	1	2	DISCRETE	336
C4M5J9	C4M5J9_ENTHI	H/ACA ribonucleoprotein complex subunit 2-like protein, putative	EHI_001850	1	2	DISCRETE	1792
C4LZI8	C4LZI8_ENTHI	HEAT repeat domain containing protein	EHI_124530	2	2	DISCRETE	1506
C4LSP0	C4LSP0_ENTHI	Histone acetyltransferase, putative	EHI_152010	2	2	DISCRETE	27
C4M2W3	C4M2W3_ENTHI	Histone H2A	EHI_188960	2	2	DIFFERENTIABLE	1100
C4M0X6	C4M0X6_ENTHI	Immuno-dominant variable surface antigen	EHI_015380	2	2	SUPERSET	569	Q05352
C4M573	C4M573_ENTHI	Importin alpha re-exporter, putative	EHI_111750	1	2	DISCRETE	1300
C4M7L1	C4M7L1_ENTHI	Inosine-uridine preferring nucleoside hydrolase, putative	EHI_199960	1	2	DISCRETE	456
C4MAP6	C4MAP6_ENTHI	Kinase, PfkB family	EHI_157120	1	2	DISCRETE	1735
B1N3T0	B1N3T0_ENTHI	Leucine-rich repeat containing protein	EHI_111540	1	2	DISCRETE	480
B1N3B2	B1N3B2_ENTHI	LIM zinc finger domain containing protein	EHI_030800	2	2	DISCRETE	1283
C4M2D4	C4M2D4_ENTHI	LIM zinc finger domain containing protein	EHI_158150	1	2	DISCRETE	1254
C4M0T6	C4M0T6_ENTHI	MIR domain protein	EHI_100480	1	2	DISCRETE	737
C4LYH7	C4LYH7_ENTHI	MIT domain protein	EHI_093860	1	2	EQUIVALENT	213	Q8I8X1
C4M4S8	C4M4S8_ENTHI	Mitochondrial carrier protein, putative	EHI_095150	2	2	EQUIVALENT	413	Q5VM58
C4LTU6	C4LTU6_ENTHI	MutT/nudix family protein	EHI_050760	1	2	DISCRETE	1505
C4M3A8	C4M3A8_ENTHI	Myo-inositol monophosphatase, putative	EHI_175410	1	2	DISCRETE	105
C4M397	C4M397_ENTHI	Nitroreductase family protein	EHI_106330	1	2	DISCRETE	1678
C4M300	C4M300_ENTHI	Oxysterol binding protein, putative	EHI_074110	1	2	DISCRETE	1139
C4LUQ6	C4LUQ6_ENTHI	Oxysterol binding protein, putative	EHI_023470	2	2	DISCRETE	1008
C4M942	C4M942_ENTHI	Peptidyl-prolyl cis-trans isomerase	EHI_083580	1	2	DISCRETE	1346
C4LZ58	C4LZ58_ENTHI	Phosducin-like protein	EHI_104470	1	2	DISCRETE	1690
C4M4S6	C4M4S6_ENTHI	Phosphatidylinositol 3-kinase, putative	EHI_095130	1	2	DISCRETE	789
C4M632	C4M632_ENTHI	Phosphomannomutase, putative	EHI_179810	1	2	DISCRETE	193
C4LYS1	C4LYS1_ENTHI	Phosphoribulokinase /uridine kinase family protein	EHI_004610	2	2	DISCRETE	1097
C4LSB1	C4LSB1_ENTHI	Proteasome subunit alpha type	EHI_153190	2	2	DISCRETE	1147
C4M7Z3	C4M7Z3_ENTHI	Proteasome subunit alpha type	EHI_167720	1	2	DIFFERENTIABLE	1017
C4LTI2	C4LTI2_ENTHI	Proteasome subunit beta type	EHI_011870	2	2	DISCRETE	938
Q76L90	Q76L90_ENTHI	Protein farnesyltransferase alpha subunit, putative	EhFTalpha	1	2	DISCRETE	1067
C4M5D4	C4M5D4_ENTHI	Protein kinase domain containing protein	EHI_121880	2	2	DISCRETE	540
C4LVR2	C4LVR2_ENTHI	Protein phosphatase domain-containing protein	EHI_186950	2	2	DISCRETE	1082
Q3LEJ5	Q3LEJ5_ENTHI	Proton-translocating inorganic pyrophosphatase	vppII	1	2	DISCRETE	1794
C4LUZ3	C4LUZ3_ENTHI	Putative uncharacterized protein	EHI_092290	1	2	DISCRETE	1450
C4LYN0	C4LYN0_ENTHI	Putative uncharacterized protein	EHI_118820	2	2	DISCRETE	47
C4LV22	C4LV22_ENTHI	Putative uncharacterized protein	EHI_092620	1	2	DISCRETE	1247
C4LXJ6	C4LXJ6_ENTHI	Putative uncharacterized protein	EHI_073310	1	2	DISCRETE	1499
C4LY61	C4LY61_ENTHI	Putative uncharacterized protein	EHI_051420	2	2	DISCRETE	1539
C4LYD4	C4LYD4_ENTHI	Putative uncharacterized protein	EHI_007970	1	2	DISCRETE	858
C4LZL1	C4LZL1_ENTHI	Putative uncharacterized protein	EHI_174660	1	2	DISCRETE	1797
C4M479	C4M479_ENTHI	Putative uncharacterized protein	EHI_140310	2	2	DISCRETE	370
C4M636	C4M636_ENTHI	Putative uncharacterized protein	EHI_179850	1	2	DISCRETE	1396
C4M7Z8	C4M7Z8_ENTHI	Putative uncharacterized protein	EHI_167660	1	2	DISCRETE	801
C4LSN2	C4LSN2_ENTHI	Putative uncharacterized protein	EHI_151930	1	2	DISCRETE	1358
B1N2G1	B1N2G1_ENTHI	Putative uncharacterized protein	EHI_152870	1	2	DISCRETE	962
C4LT46	C4LT46_ENTHI	Putative uncharacterized protein	EHI_148780	1	2	DISCRETE	1710
C4LUJ3	C4LUJ3_ENTHI	Putative uncharacterized protein	EHI_049950	2	2	DISCRETE	930
C4LXV4	C4LXV4_ENTHI	Putative uncharacterized protein	EHI_087740	1	2	DISCRETE	1675
C4M1J0	C4M1J0_ENTHI	Putative uncharacterized protein	EHI_001100	1	2	DISCRETE	1010
C4M754	C4M754_ENTHI	Putative uncharacterized protein	EHI_192140	1	2	DISCRETE	619
C4M7M0	C4M7M0_ENTHI	Putative uncharacterized protein	EHI_200070	1	2	DISCRETE	1231
C4LTJ9	C4LTJ9_ENTHI	Putative uncharacterized protein	EHI_012060	1	2	DISCRETE	1787
C4LW40	C4LW40_ENTHI	Putative uncharacterized protein	EHI_141940	2	2	DISCRETE	323
C4LWB9	C4LWB9_ENTHI	Putative uncharacterized protein	EHI_155700	1	2	DISCRETE	1376
C4LWN9	C4LWN9_ENTHI	Putative uncharacterized protein	EHI_069510	1	2	DISCRETE	286
C4M146	C4M146_ENTHI	Putative uncharacterized protein	EHI_107050	1	2	DISCRETE	1089
C4M2F0	C4M2F0_ENTHI	Putative uncharacterized protein	EHI_158310	1	2	DISCRETE	841
C4M400	C4M400_ENTHI	Putative uncharacterized protein	EHI_194850	1	2	DISCRETE	271
C4M478	C4M478_ENTHI	Putative uncharacterized protein	EHI_140300	1	2	DISCRETE	1001
C4M988	C4M988_ENTHI	Putative uncharacterized protein	EHI_119940	1	2	DISCRETE	1801
C4LTT1	C4LTT1_ENTHI	Putative uncharacterized protein	EHI_050590	1	2	EQUIVALENT	1455	C4M063
C4LUK2	C4LUK2_ENTHI	Putative uncharacterized protein	EHI_022890	1	2	DISCRETE	1272
C4M2H1	C4M2H1_ENTHI	Putative uncharacterized protein	EHI_040420	2	2	DISCRETE	809
C4MBG5	C4MBG5_ENTHI	Putative uncharacterized protein	EHI_147230	1	2	DISCRETE	1780
B1N4X5	B1N4X5_ENTHI	Putative uncharacterized protein	EHI_085720	1	2	EQUIVALENT	1036	C4LW18
C4LZZ4	C4LZZ4_ENTHI	Putative uncharacterized protein	EHI_065780	1	2	DISCRETE	1409
C4LYW9	C4LYW9_ENTHI	Putative uncharacterized protein	EHI_117850	1	2	DISCRETE	404
C4M4E1	C4M4E1_ENTHI	Putative uncharacterized protein	EHI_156420	2	2	DIFFERENTIABLE	582
C4M4I6	C4M4I6_ENTHI	Putative uncharacterized protein	EHI_138950	1	2	DISCRETE	1266
C4M5L6	C4M5L6_ENTHI	Putative uncharacterized protein	EHI_122850	1	2	EQUIVALENT	863	Q1EQ32
C4LWI9	C4LWI9_ENTHI	Putative uncharacterized protein	EHI_096790	1	2	DIFFERENTIABLE	42
C4M9M2	C4M9M2_ENTHI	Putative uncharacterized protein	EHI_112830	2	2	DISCRETE	1493
Q5NSY2	Q5NSY2_ENTHI	Rab family GTPase	EhRabX34	1	2	DISCRETE	1445
C4M1Y3	C4M1Y3_ENTHI	Rab family GTPase	EHI_164900	2	2	SUPERSET	277	Q5NT35
Q5NT22	Q5NT22_ENTHI	Rab family GTPase	EhRabK3	1	2	DISCRETE	556
Q9BLE9	Q9BLE9_ENTHI	Rab family GTPase	EhRab5	2	2	DISCRETE	1171
Q5NSZ7	Q5NSZ7_ENTHI	Rab-19, putative	EhRabX19	1	2	DISCRETE	1136
C4LZZ7	C4LZZ7_ENTHI	Radical SAM domain protein	EHI_065810	1	2	DISCRETE	1328
C4MA96	C4MA96_ENTHI	Ras family GTPase	EHI_198330	1	2	DISCRETE	966
C4M4D1	C4M4D1_ENTHI	Ribonuclease, putative	EHI_156310	1	2	DIFFERENTIABLE	355
C4M0G3	C4M0G3_ENTHI	Ribulose-phosphate 3-epimerase	EHI_006900	1	2	DISCRETE	397
C4LSK4	C4LSK4_ENTHI	RING finger protein, putative	EHI_151630	1	2	DISCRETE	1323
B1N3M7	B1N3M7_ENTHI	rRNA biogenesis protein RRP5, putative	EHI_033670	1	2	EQUIVALENT	1189	B1N4H4, B1N5X7, C4M2T6, C4MAW0
C4LSR6	C4LSR6_ENTHI	Serine palmitoyltransferase, putative	EHI_152280	1	2	DIFFERENTIABLE	727
C4M8G8	C4M8G8_ENTHI	Serine/threonine protein kinase, putative	EHI_063010	1	2	DISCRETE	1225
C4M907	C4M907_ENTHI	Serine/threonine-protein phosphatase	EHI_147720	1	2	DISCRETE	1548
C4M299	C4M299_ENTHI	Serine/threonine-protein phosphatase	EHI_136190	1	2	DISCRETE	622
B1N4N3	B1N4N3_ENTHI	Serine/threonine-protein phosphatase 2A 65 kDa regulatory subunit A, putative	EHI_019620	1	2	EQUIVALENT	1581	C4LTQ2
Q5NT39	Q5NT39_ENTHI	Small GTPase EhRabC5	EhRabC5	1	2	DIFFERENTIABLE	103
C4LZT0	C4LZT0_ENTHI	snoRNP protein gar1, putative	EHI_194040	1	2	DISCRETE	1687
C4LY12	C4LY12_ENTHI	Sodium/sulfate symporter, putative	EHI_177580	1	2	DISCRETE	1463
C4LVU5	C4LVU5_ENTHI	Transcription initiation factor SPT5, putative	EHI_187280	1	2	DISCRETE	838
B1N373	B1N373_ENTHI	U5 small nuclear ribonucleoprotein subunit, putative	EHI_021380	1	2	EQUIVALENT	1402	C4M7P1
C4M2Y3	C4M2Y3_ENTHI	Ubiquitin-conjugating enzyme family protein	EHI_048700	2	2	DISCRETE	912
C4M310	C4M310_ENTHI	Ubiquitin-conjugating enzyme family protein	EHI_025230	1	2	DISCRETE	717
C4LXI4	C4LXI4_ENTHI	Uncharacterized protein	EHI_131160	1	2	SUPERSET	256	S0AWG3
C4LXY2	C4LXY2_ENTHI	Uncharacterized protein	EHI_035510	1	2	DISCRETE	377
C4M3Q5	C4M3Q5_ENTHI	Uncharacterized protein	EHI_146110	1	2	SUPERSET	918	S0B0K6
C4M5Z1	C4M5Z1_ENTHI	Uncharacterized protein	EHI_181190	2	2	EQUIVALENT	211	S0AV72
C4LV37	C4LV37_ENTHI	Vacuolar ATP synthase subunit E, putative	EHI_182560	1	2	DISCRETE	159
Q9BI08	Q9BI08_ENTHI	Vacuolar protein sorting 29	vsp	2	2	DISCRETE	1392
C4M343	C4M343_ENTHI	V-type ATPase, C subunit, putative	EHI_059840	1	2	EQUIVALENT	682	Q24810
C4LYD1	C4LYD1_ENTHI	V-type proton ATPase subunit F	EHI_007940	1	2	DISCRETE	1761
C4LZH9	C4LZH9_ENTHI	Zn-dependent peptidase, putative	EHI_124430	1	2	DISCRETE	1217
C4LZ69	C4LZ69_ENTHI	13 kDa ribonucleoprotein-associated protein, putative	EHI_104600	1	1	DIFFERENTIABLE	62
C4M8P0	C4M8P0_ENTHI	13 kDa ribonucleoprotein-associated protein, putative	EHI_053440	1	1	DIFFERENTIABLE	62
C4M2E3	C4M2E3_ENTHI	3-ketoacyl-CoA synthase	EHI_158240	1	1	DIFFERENTIABLE	106
C4M123	C4M123_ENTHI	40S ribosomal protein S26, putative	EHI_105180	1	1	DIFFERENTIABLE	731
C4LZS2	C4LZS2_ENTHI	40S ribosomal protein S26, putative	EHI_039010	1	1	EQUIVALENT	731	C4M7G9
C4M1U6	C4M1U6_ENTHI	4-methyl-5(B-hydroxyethyl)-thiazol monophosphate biosynthesis enzyme, putative	EHI_027600	1	1	DISCRETE	1102
C4LZZ0	C4LZZ0_ENTHI	60S ribosomal protein L30, putative	EHI_065740	1	1	DIFFERENTIABLE	631
C4M8A9	C4M8A9_ENTHI	60S ribosomal protein L31, putative	EHI_058080	1	1	DIFFERENTIABLE	613
C4M6F9	C4M6F9_ENTHI	60S ribosomal protein L38, putative	EHI_099790	1	1	EQUIVALENT	659	C4M7I6
C4LV09	C4LV09_ENTHI	60S ribosomal protein L40, putative	EHI_092470	1	1	DISCRETE	1252
C4M5D7	C4M5D7_ENTHI	Acyl-coA synthetase, putative	EHI_131880	1	1	DISCRETE	1738
Q9U7F6	Q9U7F6_ENTHI	Adhesin 112 (EhADH112)	adh112	1	1	DISCRETE	553
A1A491	A1A491_ENTHI	Ameobapore C		1	1	EQUIVALENT	1523	A1A492, C4LZ09, Q24825, Q76N77
C4LY44	ASNA_ENTHI	ATPase ASNA1 homolog	EHI_177400	1	1	EQUIVALENT	1329	S0AVM8, S0AXE8, S0AZL3
C4M9V6	C4M9V6_ENTHI	ATPase, Vps4 oligomerisation domain containing protein	EHI_036890	1	1	DISCRETE	1519
C4M007	C4M007_ENTHI	ATP-binding cassette protein, putative	EHI_134470	1	1	DIFFERENTIABLE	940
C4M3D9	C4M3D9_ENTHI	ATP-binding cassette, putative	EHI_095820	1	1	EQUIVALENT	1106	C4M558
C4MA60	C4MA60_ENTHI	C2 domain containing protein	EHI_069950	1	1	DISCRETE	83
C4M7Q6	C4M7Q6_ENTHI	Calcium-binding protein 1 (EhCBP1)	EHI_120900	1	1	EQUIVALENT	788	P38505
B1N4N4	B1N4N4_ENTHI	Caldesmon, putative	EHI_019640	1	1	DIFFERENTIABLE	101
C4LUS0	C4LUS0_ENTHI	Calmodulin, putative	EHI_178540	1	1	DISCRETE	1721
B1N2S2	B1N2S2_ENTHI	Calmodulin, putative	EHI_117470	1	1	DISCRETE	1187
C4MB98	C4MB98_ENTHI	Calmodulin, putative	EHI_000130	1	1	DISCRETE	1144
C4LT56	C4LT56_ENTHI	Calmodulin, putative	EHI_148890	1	1	DIFFERENTIABLE	273
Q1EQ31	Q1EQ31_ENTHI	Coatomer alpha subunit, putative	EHI_088090	1	1	DISCRETE	452
Q1EQ36	Q1EQ36_ENTHI	Coatomer subunit gamma	EHI_040700	1	1	DISCRETE	1216
C4LVK0	C4LVK0_ENTHI	COP9 signalosome complex subunit 3, putative	EHI_103560	1	1	DISCRETE	177
C4M5U0	C4M5U0_ENTHI	Coronin	EHI_082080	1	1	DISCRETE	208
C4LZ01	C4LZ01_ENTHI	Cullin, putative	EHI_118180	1	1	DISCRETE	1429
C4M2H3	C4M2H3_ENTHI	Cysteine protease binding protein family 7	cpbf7	1	1	DISCRETE	552
C4LX40	C4LX40_ENTHI	Cysteine protease inhibitor 1 (EhICP1)	EHI_159600	1	1	EQUIVALENT	1271	Q6KCA4
C4M7W7	C4M7W7_ENTHI	Cytosolic Fe-S cluster assembly factor NUBP1 homolog	EHI_047750	1	1	DISCRETE	878
C4M1Z3	C4M1Z3_ENTHI	DEAD/DEAH box helicase, putative	EHI_165110	1	1	DISCRETE	1785
C4M6A9	C4M6A9_ENTHI	DEAD/DEAH box helicase, putative	EHI_082600	1	1	DISCRETE	886
C4M9V7	C4M9V7_ENTHI	DEAD/DEAH box helicase, putative	EHI_036900	1	1	DISCRETE	1649
C4M2N7	C4M2N7_ENTHI	Deoxyhypusine synthase, putative	EHI_006030	1	1	DISCRETE	910
Q9U593	Q9U593_ENTHI	Dipeptidyl-peptidase, putative	dpp	1	1	DIFFERENTIABLE	643
C4M3N9	C4M3N9_ENTHI	DNA replication licensing factor, putative	EHI_140670	1	1	DISCRETE	1637
C4LV33	C4LV33_ENTHI	DNAJ homolog subfamily A member 1, putative	EHI_182520	1	1	DISCRETE	200
C4LWN1	C4LWN1_ENTHI	Dolichyl-di-phosphooligosaccharide-protein glycotransferase, putative	EHI_069430	1	1	EQUIVALENT	711	C4M4V6
C4LYH0	C4LYH0_ENTHI	Dolychil-diphosphooligosaccharide--protein glycosyltransferase subunit, putative	EHI_093790	1	1	DIFFERENTIABLE	758
C4MAU7	C4MAU7_ENTHI	Eukaryotic translation initiation factor 2 gamma subunit, putative	EHI_132880	1	1	DISCRETE	1242
C4LTB2	C4LTB2_ENTHI	Eukaryotic translation initiation factor 4 gamma, putative	EHI_044930	1	1	DISCRETE	1443
C4M2F7	C4M2F7_ENTHI	Eukaryotic translation initiation factor 4E, putative	EHI_040280	1	1	DISCRETE	1092
C4LUN0	C4LUN0_ENTHI	Exonuclease I, putative	EHI_023190	1	1	DISCRETE	828
Q2PHE2	Q2PHE2_ENTHI	Geranylgeranyltransferase II beta subunit	EhGGTIIb	1	1	DISCRETE	1130
C4LVN5	C4LVN5_ENTHI	Glucosamine 6-phosphate N-acetyltransferase. putative	EHI_186340	1	1	DISCRETE	1013
Q5NSX9	Q5NSX9_ENTHI	GTP-binding protein EhRabX36, putative	EhRabX36	1	1	DISCRETE	143
C4LU53	C4LU53_ENTHI	HEAT repeat domain containing protein	EHI_068630	1	1	DIFFERENTIABLE	1456
C4M981	C4M981_ENTHI	HEAT repeat domain containing protein	EHI_124870	1	1	DISCRETE	1377
C4M0B6	C4M0B6_ENTHI	Heat shock protein 70, putative	EHI_064470	1	1	DISCRETE	334
B1N2L8	B1N2L8_ENTHI	Heat shock protein, putative	EHI_022620	1	1	EQUIVALENT	1262	B1N3R1, B1N3X2, B1N4V0, B1N523, B1N5D4, C4LXL4, C4MB78
C4LV75	C4LV75_ENTHI	Histone H2B	EHI_188730	1	1	EQUIVALENT	1689	O15582
C4M2C4	C4M2C4_ENTHI	Hsc70-interacting protein, putative	EHI_158050	1	1	DISCRETE	73
C4M666	C4M666_ENTHI	Initiation factor eIF-2B delta subunit, putative	EHI_042980	1	1	DISCRETE	31
C4M104	C4M104_ENTHI	Iron-sulfur flavoprotein, putative	EHI_135180	1	1	DISCRETE	945
C4LT23	C4LT23_ENTHI	Leucine rich repeat protein, BspA family	EHI_148530	1	1	DISCRETE	623
B1N3D5	B1N3D5_ENTHI	Leucine-rich repeat containing protein	EHI_164460	1	1	DISCRETE	220
C4M6P9	C4M6P9_ENTHI	Leukocyte-endothelial cell adhesion molecule 3, putative	EHI_201200	1	1	DIFFERENTIABLE	333
C4M8T2	C4M8T2_ENTHI	Long-chain-fatty-acid--CoA ligase, putative	EHI_147010	1	1	DIFFERENTIABLE	655
C4LZX1	C4LZX1_ENTHI	Molybdenum cofactor sulfurase putative	EHI_194600	1	1	DISCRETE	235
C4M0V2	C4M0V2_ENTHI	Multidrug resistance protein, putative	EHI_100320	1	1	DISCRETE	529
C4M491	C4M491_ENTHI	MuT/nudix family protein	EHI_097930	1	1	DISCRETE	1353
C4M3P4	C4M3P4_ENTHI	Myosin heavy chain	EHI_140720	1	1	DISCRETE	649
C4LUN7	C4LUN7_ENTHI	Nicotinate phosphoribosyltransferase, putative	EHI_023260	1	1	DISCRETE	522
C4LU58	C4LU58_ENTHI	Nucleolar phosphoprotein Nopp34, putative	EHI_068680	1	1	DISCRETE	1755
C4M6X1	C4M6X1_ENTHI	Nucleosome assembly protein, putative	EHI_139460	1	1	DISCRETE	937
C4LVW1	C4LVW1_ENTHI	Oxidoreductase, putative	EHI_125740	1	1	DISCRETE	748
C4LSF7	C4LSF7_ENTHI	Phosphatidylinositol-4-phosphate 5-kinase, putative	EHI_153770	1	1	DISCRETE	745
C4M3X9	C4M3X9_ENTHI	Phospholipase, patatin family protein	EHI_200740	1	1	DISCRETE	1338
C4M8I8	C4M8I8_ENTHI	Phosphomannose isomerase, putative	EHI_162210	1	1	DISCRETE	1054
C4M933	C4M933_ENTHI	PH-protein kinase domain containing protein	EHI_097620	1	1	DIFFERENTIABLE	833
C4M8V6	C4M8V6_ENTHI	Prefoldin subunit 2, putative	EHI_113900	1	1	DISCRETE	1312
C4M298	C4M298_ENTHI	Proteasome regulatory subunit, putative	EHI_136180	1	1	DISCRETE	977
C4M2M2	C4M2M2_ENTHI	Proteasome regulatory subunit, putative	EHI_005870	1	1	DISCRETE	290
C4LVM7	C4LVM7_ENTHI	Proteasome regulatory subunit, putative	EHI_103850	1	1	DIFFERENTIABLE	917
C4LUD5	C4LUD5_ENTHI	Proteasome subunit beta type	EHI_049330	1	1	DISCRETE	1636
C4LSX4	C4LSX4_ENTHI	Proteasome subunit beta type	EHI_148040	1	1	DISCRETE	1061
C4LY81	C4LY81_ENTHI	Protein kinase domain containing protein	EHI_051900	1	1	DISCRETE	1309
C4M5Z8	C4M5Z8_ENTHI	Protein kinase domain containing protein	EHI_181260	1	1	DISCRETE	1788
C4M3R9	C4M3R9_ENTHI	Protein kinase, putative	EHI_052800	1	1	DISCRETE	1049
C4MA75	C4MA75_ENTHI	Protein kinase, putative	EHI_075190	1	1	DISCRETE	1545
C4LW39	C4LW39_ENTHI	Protein kinase, putative	EHI_141930	1	1	DISCRETE	1569
C4M7G3	C4M7G3_ENTHI	Protein kinase, putative	EHI_158590	1	1	DISCRETE	1107
C4M8B8	C4M8B8_ENTHI	Protein tyrosine kinase domain-containing protein	EHI_101280	1	1	DIFFERENTIABLE	1336
C4LZX4	C4LZX4_ENTHI	Protein with RhoGEF and ArfGAP domains	EHI_194630	1	1	DISCRETE	773
C4LS87	C4LS87_ENTHI	Putative uncharacterized protein	EHI_152940	1	1	DISCRETE	1395
C4LXG8	C4LXG8_ENTHI	Putative uncharacterized protein	EHI_131000	1	1	DIFFERENTIABLE	560
B1N2X2	B1N2X2_ENTHI	Putative uncharacterized protein	EHI_164740	1	1	DISCRETE	1228
B1N3S7	B1N3S7_ENTHI	Putative uncharacterized protein	EHI_128170	1	1	DISCRETE	1645
B1N435	B1N435_ENTHI	Putative uncharacterized protein	EHI_035990	1	1	DISCRETE	1745
B1N4D7	B1N4D7_ENTHI	Putative uncharacterized protein	EHI_025870	1	1	DISCRETE	1560
B1N557	B1N557_ENTHI	Putative uncharacterized protein	EHI_048420	1	1	DISCRETE	1388
B1N5K8	B1N5K8_ENTHI	Putative uncharacterized protein	EHI_063140	1	1	EQUIVALENT	1570	C4M100
C4LT24	C4LT24_ENTHI	Putative uncharacterized protein	EHI_148540	1	1	DISCRETE	855
C4LTF0	C4LTF0_ENTHI	Putative uncharacterized protein	EHI_045370	1	1	DISCRETE	1449
C4LTS3	C4LTS3_ENTHI	Putative uncharacterized protein	EHI_050500	1	1	DISCRETE	1528
C4LTW8	C4LTW8_ENTHI	Putative uncharacterized protein	EHI_050980	1	1	DISCRETE	1768
C4LU33	C4LU33_ENTHI	Putative uncharacterized protein	EHI_068410	1	1	DISCRETE	769
C4LU60	C4LU60_ENTHI	Putative uncharacterized protein	EHI_068700	1	1	DISCRETE	1742
C4LUI3	C4LUI3_ENTHI	Putative uncharacterized protein	EHI_049850	1	1	DISCRETE	1508
C4LUS8	C4LUS8_ENTHI	Putative uncharacterized protein	EHI_178630	1	1	DISCRETE	1459
C4LUV3	C4LUV3_ENTHI	Putative uncharacterized protein	EHI_178890	1	1	DISCRETE	1631
C4LUW0	C4LUW0_ENTHI	Putative uncharacterized protein	EHI_178970	1	1	DIFFERENTIABLE	1341
C4LV19	C4LV19_ENTHI	Putative uncharacterized protein	EHI_092580	1	1	DISCRETE	1512
C4LVI0	C4LVI0_ENTHI	Putative uncharacterized protein	EHI_103360	1	1	DISCRETE	1622
C4LVI6	C4LVI6_ENTHI	Putative uncharacterized protein	EHI_103420	1	1	DISCRETE	1764
C4LVQ4	C4LVQ4_ENTHI	Putative uncharacterized protein	EHI_186870	1	1	DISCRETE	1109
C4LWJ0	C4LWJ0_ENTHI	Putative uncharacterized protein	EHI_096800	1	1	DISCRETE	1333
C4LX94	C4LX94_ENTHI	Putative uncharacterized protein	EHI_013280	1	1	DISCRETE	1420
C4LXV1	C4LXV1_ENTHI	Putative uncharacterized protein	EHI_087710	1	1	DISCRETE	507
C4LYK2	C4LYK2_ENTHI	Putative uncharacterized protein	EHI_118400	1	1	DISCRETE	1134
C4LYX0	C4LYX0_ENTHI	Putative uncharacterized protein	EHI_117860	1	1	DISCRETE	1579
C4M177	C4M177_ENTHI	Putative uncharacterized protein	EHI_188030	1	1	DISCRETE	1699
C4M196	C4M196_ENTHI	Putative uncharacterized protein	EHI_188220	1	1	DISCRETE	933
C4M1M8	C4M1M8_ENTHI	Putative uncharacterized protein	EHI_133990	1	1	DISCRETE	476
C4M1U8	C4M1U8_ENTHI	Putative uncharacterized protein	EHI_027620	1	1	DISCRETE	1477
C4M1Z5	C4M1Z5_ENTHI	Putative uncharacterized protein	EHI_165130	1	1	DISCRETE	1656
C4M2P9	C4M2P9_ENTHI	Putative uncharacterized protein	EHI_006150	1	1	DISCRETE	1340
C4M2X1	C4M2X1_ENTHI	Putative uncharacterized protein	EHI_048580	1	1	DISCRETE	1339
C4M324	C4M324_ENTHI	Putative uncharacterized protein	EHI_025370	1	1	DISCRETE	1498
C4M345	C4M345_ENTHI	Putative uncharacterized protein	EHI_059870	1	1	DISCRETE	129
C4M3Y5	C4M3Y5_ENTHI	Putative uncharacterized protein	EHI_200800	1	1	DISCRETE	1146
C4M484	C4M484_ENTHI	Putative uncharacterized protein	EHI_140360	1	1	DISCRETE	1050
C4M4F0	C4M4F0_ENTHI	Putative uncharacterized protein	EHI_078580	1	1	DISCRETE	1350
C4M550	C4M550_ENTHI	Putative uncharacterized protein	EHI_078310	1	1	DISCRETE	1688
C4M581	C4M581_ENTHI	Putative uncharacterized protein	EHI_111830	1	1	DISCRETE	1002
C4M596	C4M596_ENTHI	Putative uncharacterized protein	EHI_154330	1	1	DIFFERENTIABLE	414
C4M5C8	C4M5C8_ENTHI	Putative uncharacterized protein	EHI_121820	1	1	DISCRETE	1440
C4M5P4	C4M5P4_ENTHI	Putative uncharacterized protein	EHI_040650	1	1	DISCRETE	1170
C4M5Y0	C4M5Y0_ENTHI	Putative uncharacterized protein	EHI_137050	1	1	DISCRETE	1441
C4M629	C4M629_ENTHI	Putative uncharacterized protein	EHI_125390	1	1	DISCRETE	1604
C4M6G6	C4M6G6_ENTHI	Putative uncharacterized protein	EHI_099860	1	1	DISCRETE	1563
C4M729	C4M729_ENTHI	Putative uncharacterized protein	EHI_183500	1	1	DISCRETE	964
C4M783	C4M783_ENTHI	Putative uncharacterized protein	EHI_044360	1	1	DISCRETE	873
C4M7Q3	C4M7Q3_ENTHI	Putative uncharacterized protein	EHI_120870	1	1	DISCRETE	1651
C4M8C5	C4M8C5_ENTHI	Putative uncharacterized protein	EHI_039330	1	1	DISCRETE	1468
C4M8E5	C4M8E5_ENTHI	Putative uncharacterized protein	EHI_115340	1	1	DISCRETE	1209
C4M8N5	C4M8N5_ENTHI	Putative uncharacterized protein	EHI_077530	1	1	DISCRETE	559
C4M8R5	C4M8R5_ENTHI	Putative uncharacterized protein	EHI_181530	1	1	DISCRETE	384
C4M8V7	C4M8V7_ENTHI	Putative uncharacterized protein	EHI_113910	1	1	DISCRETE	1062
C4M9R0	C4M9R0_ENTHI	Putative uncharacterized protein	EHI_196380	1	1	DISCRETE	718
C4MA45	C4MA45_ENTHI	Putative uncharacterized protein	EHI_067090	1	1	DISCRETE	254
C4MA51	C4MA51_ENTHI	Putative uncharacterized protein	EHI_172500	1	1	DISCRETE	1362
C4MBQ3	C4MBQ3_ENTHI	Putative uncharacterized protein	EHI_053320	1	1	DISCRETE	1306
C4LSC0	C4LSC0_ENTHI	Putative uncharacterized protein	EHI_153290	1	1	DISCRETE	913
C4LSG5	C4LSG5_ENTHI	Putative uncharacterized protein	EHI_151220	1	1	DISCRETE	1638
C4LT54	C4LT54_ENTHI	Putative uncharacterized protein	EHI_148870	1	1	DISCRETE	1052
C4LU55	C4LU55_ENTHI	Putative uncharacterized protein	EHI_068650	1	1	DISCRETE	136
C4LUW5	C4LUW5_ENTHI	Putative uncharacterized protein	EHI_179020	1	1	DISCRETE	461
C4LV51	C4LV51_ENTHI	Putative uncharacterized protein	EHI_182700	1	1	DISCRETE	1590
C4LW78	C4LW78_ENTHI	Putative uncharacterized protein	EHI_155250	1	1	DISCRETE	238
C4LWC1	C4LWC1_ENTHI	Putative uncharacterized protein	EHI_155720	1	1	DISCRETE	236
C4LZ98	C4LZ98_ENTHI	Putative uncharacterized protein	EHI_000470	1	1	DISCRETE	1380
C4M0I5	C4M0I5_ENTHI	Putative uncharacterized protein	EHI_024430	1	1	DISCRETE	1574
C4M1A7	C4M1A7_ENTHI	Putative uncharacterized protein	EHI_169840	1	1	DISCRETE	925
C4M1B9	C4M1B9_ENTHI	Putative uncharacterized protein	EHI_169970	1	1	DISCRETE	1355
C4M378	C4M378_ENTHI	Putative uncharacterized protein	EHI_086230	1	1	DISCRETE	1241
C4M9W7	C4M9W7_ENTHI	Putative uncharacterized protein	EHI_129340	1	1	DISCRETE	1066
B1N2P1	B1N2P1_ENTHI	Putative uncharacterized protein	EHI_182980	1	1	DIFFERENTIABLE	923
C4LUC1	C4LUC1_ENTHI	Putative uncharacterized protein	EHI_110740	1	1	DISCRETE	658
C4LVP6	C4LVP6_ENTHI	Putative uncharacterized protein	EHI_186790	1	1	DISCRETE	1360
C4LVU4	C4LVU4_ENTHI	Putative uncharacterized protein	EHI_187270	1	1	DISCRETE	948
C4LWF4	C4LWF4_ENTHI	Putative uncharacterized protein	EHI_096410	1	1	DISCRETE	1406
C4M426	C4M426_ENTHI	Putative uncharacterized protein	EHI_114190	1	1	DISCRETE	1046
C4M7P6	C4M7P6_ENTHI	Putative uncharacterized protein	EHI_091090	1	1	DISCRETE	378
C4M9L9	C4M9L9_ENTHI	Putative uncharacterized protein	EHI_112800	1	1	DISCRETE	629
Q8I8X6	Q8I8X6_ENTHI	Putative uncharacterized protein	EHI_111070	1	1	DISCRETE	1439
B1N3Z3	B1N3Z3_ENTHI	Putative uncharacterized protein	EHI_145610	1	1	DIFFERENTIABLE	517
C4LSH8	C4LSH8_ENTHI	Putative uncharacterized protein	EHI_151360	1	1	DISCRETE	684
C4LU44	C4LU44_ENTHI	Putative uncharacterized protein	EHI_068530	1	1	EQUIVALENT	699	C4M3G1
C4M698	C4M698_ENTHI	Putative uncharacterized protein	EHI_081710	1	1	DISCRETE	1364
C4M816	C4M816_ENTHI	Putative uncharacterized protein	EHI_143550	1	1	DISCRETE	951
C4M8U8	C4M8U8_ENTHI	Putative uncharacterized protein	EHI_169670	1	1	DISCRETE	357
C4LY71	C4LY71_ENTHI	Putative uncharacterized protein	EHI_051760	1	1	DISCRETE	215
C4M1J2	C4M1J2_ENTHI	Putative uncharacterized protein	EHI_001120	1	1	DISCRETE	1731
C4LW27	C4LW27_ENTHI	Putative uncharacterized protein	EHI_141800	1	1	DISCRETE	1289
C4M0P9	C4M0P9_ENTHI	Putative uncharacterized protein	EHI_009840	1	1	DISCRETE	1081
C4LXC4	C4LXC4_ENTHI	Pyruvate kinase	EHI_098420	1	1	DISCRETE	1544
Q9NDI3	Q9NDI3_ENTHI	Rab B GTPase	rabB	1	1	DIFFERENTIABLE	1318
B1N3J0	B1N3J0_ENTHI	Rab family GTPase	EHI_059670	1	1	SUPERSET	277	Q9BLF1
Q9BLE6	Q9BLE6_ENTHI	Rab family GTPase	EhRabF5	1	1	DIFFERENTIABLE	600
C4MA07	C4MA07_ENTHI	Rab family GTPase	EHI_146510	1	1	DIFFERENTIABLE	277
B1N5I9	B1N5I9_ENTHI	Rac-like GTP-binding protein RAC2, putative	EHI_013650	1	1	DISCRETE	808
C4M3Z7	C4M3Z7_ENTHI	Ran GTPase-activating protein, putative	EHI_185290	1	1	DISCRETE	1132
C4MAI1	C4MAI1_ENTHI	Ras family GTPase	EHI_196530	1	1	DISCRETE	1356
C4M5K5	C4M5K5_ENTHI	Ras GTPase-activating protein, putative	EHI_001910	1	1	DISCRETE	394
C4LXY5	C4LXY5_ENTHI	Regulator of nonsense transcripts, putative	EHI_035550	1	1	DISCRETE	1096
C4M9T7	C4M9T7_ENTHI	Rho family GTPase	EHI_190440	1	1	DISCRETE	81
C4LWK6	C4LWK6_ENTHI	Rho GTPase activating protein, putative	EHI_069180	1	1	DISCRETE	1715
C4M8C8	C4M8C8_ENTHI	Rho guanine nucleotide exchange factor, putative	EHI_039480	1	1	DIFFERENTIABLE	539
C4LSA7	C4LSA7_ENTHI	RhoGAP domain containing protein	EHI_153150	1	1	DISCRETE	793
C4M247	C4M247_ENTHI	Ribonuclease, putative	EHI_169300	1	1	DIFFERENTIABLE	355
C4LZN4	C4LZN4_ENTHI	Ribosome biogenesis protein, putative	EHI_175090	1	1	EQUIVALENT	1156	S0AWR7
C4M5W4	C4M5W4_ENTHI	RNA recognition motif domain containing protein	EHI_026440	1	1	DISCRETE	482
Q1EPX9	Q1EPX9_ENTHI	Sec1 family protein	EHI_000910	1	1	DISCRETE	362
C4LW81	C4LW81_ENTHI	Serine/threonine-protein kinase DCAMKL3, putative	EHI_155280	1	1	DISCRETE	1031
C4M8B6	C4M8B6_ENTHI	Serine/threonine-protein kinase, putative	EHI_101250	1	1	DISCRETE	935
C4M4K6	C4M4K6_ENTHI	Serine/threonine-protein phosphatase	EHI_031240	1	1	DISCRETE	1274
C4M2N9	C4M2N9_ENTHI	Serine/threonine-protein phosphatase	EHI_006050	1	1	DISCRETE	1060
C4LSY7	C4LSY7_ENTHI	Serine/threonine-protein phosphatase 2A 55 kDa regulatory subunit B	EHI_148170	1	1	DISCRETE	1277
C4M3Y9	C4M3Y9_ENTHI	Signal recognition particle receptor alpha subunit, putative	EHI_200840	1	1	DISCRETE	647
Q5NT18	Q5NT18_ENTHI	Small GTPase EhRabM3	EhRabM3	1	1	DISCRETE	992
C4M1A5	C4M1A5_ENTHI	SNF7 family protein	EHI_169820	1	1	DISCRETE	861
C4MB25	C4MB25_ENTHI	Sodium/hydrogen exchanger	EHI_176180	1	1	DISCRETE	1337
C4M6V4	C4M6V4_ENTHI	SWIRM domain protein	EHI_170610	1	1	DISCRETE	1680
Q1EPY3	Q1EPY3_ENTHI	Syntaxin binding protein, putative	EHI_093130	1	1	DISCRETE	701
C4LZ27	C4LZ27_ENTHI	TBC domain containing protein	EHI_009510	1	1	DISCRETE	544
B1N510	B1N510_ENTHI	T-complex protein 1 subunitTheta, putative	EHI_071600	1	1	EQUIVALENT	272	C4M3N2
B1N2N4	B1N2N4_ENTHI	Threonine dehydratase	EhTD1	1	1	SUPERSET	1425	C4LVZ3
C4LXH0	C4LXH0_ENTHI	Translation initiation factor eIF-2B epsilon subunit, putative	EHI_131020	1	1	DISCRETE	504
C4M9X9	C4M9X9_ENTHI	Translation initiation factor, putative	EHI_179390	1	1	DISCRETE	279
C4M0C2	C4M0C2_ENTHI	Type A flavoprotein, putative	EHI_064530	1	1	DIFFERENTIABLE	372
C4LUJ2	C4LUJ2_ENTHI	Ubiquitin carboxyl-terminal hydrolase	EHI_049940	1	1	DISCRETE	483
C4M1S2	C4M1S2_ENTHI	Ubiquitin-conjugating enzyme family protein	EHI_164400	1	1	DISCRETE	1256
C4LUL1	C4LUL1_ENTHI	Ubiquitin-like protein	EHI_022980	1	1	DISCRETE	1704
C4LV54	C4LV54_ENTHI	Uncharacterized protein	EHI_182730	1	1	DISCRETE	1065
C4LZ82	C4LZ82_ENTHI	Uncharacterized protein	EHI_104740	1	1	DISCRETE	1229
C4M0F6	C4M0F6_ENTHI	Uncharacterized protein	EHI_006830	1	1	EQUIVALENT	371	S0B1G4
C4M2T9	C4M2T9_ENTHI	Uncharacterized protein	EHI_188720	1	1	SUPERSET	923	S0AXE4, S0AXU9, S0AY25
C4MA42	C4MA42_ENTHI	Uncharacterized protein	EHI_166030	1	1	DISCRETE	877
C4M3D8	C4M3D8_ENTHI	Uncharacterized protein	EHI_095810	1	1	DISCRETE	1249
C4LV20	C4LV20_ENTHI	Vacuolar ATP synthase subunit C, putative	EHI_092600	1	1	DISCRETE	694
C4LTE5	C4LTE5_ENTHI	Vacuolar protein sorting 36, putative	EHI_045320	1	1	DISCRETE	1516
C4M6Y9	C4M6Y9_ENTHI	V-type ATPase, D subunit, putative	EHI_056390	1	1	DISCRETE	206
C4M7A6	C4M7A6_ENTHI	Zinc finger protein, putative	EHI_055640	1	1	DISCRETE	515

## Sheet: Cys-Like Structures Proteins
Protein Name	Entry name	Protein name	Gene name	Peptides Cyst-Like Structures	Peptides-Hits Cyst-Like Structures	Parsimony Type	Cluster	Equiv. Proteins
C4M2R2	C4M2R2_ENTHI	Alcohol dehydrogenase, putative	EHI_160940	81	518	DIFFERENTIABLE	54
Q24803	ADH2_ENTHI	Aldehyde-alcohol dehydrogenase 2	ADH2	79	472	DIFFERENTIABLE	54
B1N387	B1N387_ENTHI	Aldehyde-alcohol dehydrogenase 2, putative	EHI_024240	67	399	DIFFERENTIABLE	54
S0AUW6	S0AUW6_ENTHI	Actin		46	373	DIFFERENTIABLE	123
S0AWJ9	S0AWJ9_ENTHI	Actin, putative		45	363	DIFFERENTIABLE	123
S0AWF4	S0AWF4_ENTHI	Actin		45	363	DIFFERENTIABLE	123
S0AWZ1	S0AWZ1_ENTHI	Actin		46	363	DIFFERENTIABLE	123
S0AUT4	S0AUT4_ENTHI	Actin, putative		44	361	DIFFERENTIABLE	123
S0AVA7	S0AVA7_ENTHI	Actin, putative		44	361	DIFFERENTIABLE	123
S0AWJ4	S0AWJ4_ENTHI	Actin, putative		45	358	DIFFERENTIABLE	123
S0AUS7	S0AUS7_ENTHI	Actin, putative		43	354	DIFFERENTIABLE	123
S0AV75	S0AV75_ENTHI	Actin, putative		45	346	DIFFERENTIABLE	123
Q9TYD6	Q9TYD6_ENTHI	Actin		43	342	DIFFERENTIABLE	123
S0AVQ9	S0AVQ9_ENTHI	Actin, putative		46	337	DIFFERENTIABLE	123
S0AUR6	S0AUR6_ENTHI	Actin, putative		40	332	DIFFERENTIABLE	123
S0AXB5	S0AXB5_ENTHI	Actin, putative		40	331	DIFFERENTIABLE	123
S0AWA2	S0AWA2_ENTHI	Actin, putative		40	331	DIFFERENTIABLE	123
S0AV23	S0AV23_ENTHI	Actin, putative		43	324	DIFFERENTIABLE	123
S0AWT4	S0AWT4_ENTHI	Actin, putative		34	296	DIFFERENTIABLE	123
S0AW09	S0AW09_ENTHI	Actin, putative		40	285	DIFFERENTIABLE	123
Q24801	Q24801_ENTHI	Pyruvate phosphate dikinase	EHI_009530	64	285	DIFFERENTIABLE	127
B1N621	B1N621_ENTHI	Actin, putative	EHI_043640	38	282	DIFFERENTIABLE	123
S0AYK4	S0AYK4_ENTHI	Grainin 1		32	281	DIFFERENTIABLE	88
S0AV15	S0AV15_ENTHI	Actin, putative		38	280	DIFFERENTIABLE	123
S0AVT2	S0AVT2_ENTHI	Actin, putative		35	251	DIFFERENTIABLE	123
Q9NJW1	Q9NJW1_ENTHI	Grainin 2	grainin 2	33	201	SUPERSET	140
Q1EQ28	Q1EQ28_ENTHI	Clathrin heavy chain		61	192	DISCRETE	2
Q9UAB5	Q9UAB5_ENTHI	Grainin 1	grainin 1	27	189	DIFFERENTIABLE	88
C4LTX6	C4LTX6_ENTHI	Pyruvate:ferredoxin oxidoreductase	EHI_051060	59	185	DIFFERENTIABLE	22
C4MB38	C4MB38_ENTHI	Protein disulfide isomerase, putative	EHI_071590	35	180	EQUIVALENT	442	Q5XWD1
C4M770	C4M770_ENTHI	70 kDa heat shock protein, putative	EHI_199590	43	177	DIFFERENTIABLE	74
B1N3C7	B1N3C7_ENTHI	Galactose-inhibitable lectin 170 kDa subunit, putative	EHI_133900	55	166	SUPERSET	24	P32022
C4LXE8	C4LXE8_ENTHI	Enolase, putative	EHI_130700	36	164	SUPERSET	9	P51555, S0AWN3
S0AW06	S0AW06_ENTHI	Enolase, putative		35	162	DIFFERENTIABLE	9
Q24835	Q24835_ENTHI	Galactose-specific adhesin 170kD subunit	hgl3	54	160	DIFFERENTIABLE	24
C4LTM0	C4LTM0_ENTHI	Gal/GalNAc lectin heavy subunit	EHI_012270	50	153	DIFFERENTIABLE	24
Q964D2	Q964D2_ENTHI	Gal/GalNAc lectin Igl1	igl1	45	152	DIFFERENTIABLE	71
Q9U3Z8	Q9U3Z8_ENTHI	Actinin-like protein	ALP	36	148	DIFFERENTIABLE	284
S0AYM0	S0AYM0_ENTHI	Actin, putative		32	148	DIFFERENTIABLE	123
O77164	O77164_ENTHI	70 kDa heat shock protein Hsp70-Bip	BiP	37	142	DIFFERENTIABLE	74
S0B0T0	S0B0T0_ENTHI	Actin, putative		30	133	DIFFERENTIABLE	123
Q24860	Q24860_ENTHI	Pyruvate oxidoreductase		41	132	DIFFERENTIABLE	22
C4M6L0	C4M6L0_ENTHI	Gal/GalNAc lectin subunit Igl2	EHI_065330	31	125	DIFFERENTIABLE	71
C4M3Q0	C4M3Q0_ENTHI	Peroxiredoxin	EHI_145840	27	124	DIFFERENTIABLE	280
Q4VSM4	Q4VSM4_ENTHI	Vacuolar ATPase subunit B	EHI_189850	27	121	DIFFERENTIABLE	205
C4MA60	C4MA60_ENTHI	C2 domain containing protein	EHI_069950	28	116	DISCRETE	83
S0B1Y3	S0B1Y3_ENTHI	Actin		29	116	DIFFERENTIABLE	123
B1N5A8	B1N5A8_ENTHI	Peroxiredoxin	EHI_123390	23	116	SUPERSET	280
C4M5Y9	C4M5Y9_ENTHI	Copine, putative	EHI_137110	16	107	DISCRETE	896
S0AX11	S0AX11_ENTHI	Glyceraldehyde-3-phosphate dehydrogenase, putative		30	105	DIFFERENTIABLE	80
C4LVR9	C4LVR9_ENTHI	Glyceraldehyde-3-phosphate dehydrogenase, putative	EHI_187020	30	105	SUPERSET	80
S0AWG4	S0AWG4_ENTHI	Elongation factor 1-alpha		21	86	DIFFERENTIABLE	36
S0AXA4	S0AXA4_ENTHI	Elongation factor 1-alpha		19	81	SUPERSET	36
Q24802	Q24802_ENTHI	V-type ATPase, A subunit, putative	EHI_043010	19	77	DISCRETE	229
C4LU72	C4LU72_ENTHI	Myosin heavy chain	EHI_110180	37	73	DIFFERENTIABLE	61
C4MBE2	C4MBE2_ENTHI	EF-hand calcium-binding domain containing protein	EHI_060740	8	72	SUPERSET	699	Q9GSV7
C4LU18	C4LU18_ENTHI	Adenosylhomocysteinase	EHI_068250	24	72	DISCRETE	204
S0B0R7	S0B0R7_ENTHI	Elongation factor 1-alpha		18	72	DIFFERENTIABLE	36
C4M067	C4M067_ENTHI	Thioredoxin, putative	EHI_021560	16	67	DIFFERENTIABLE	591
B1N4I3	B1N4I3_ENTHI	Putative uncharacterized protein	EHI_055400	22	67	DIFFERENTIABLE	467
C4LWI9	C4LWI9_ENTHI	Putative uncharacterized protein	EHI_096790	12	65	DIFFERENTIABLE	42
Q07569	Q07569_ENTHI	Myosin heavy chain	mhcA	31	65	DIFFERENTIABLE	61
C4LUV9	C4LUV9_ENTHI	Acetyl-CoA synthetase, putative	EHI_178960	23	65	DIFFERENTIABLE	60
C4LT47	C4LT47_ENTHI	Gal/GalNAc lectin light subunit	EHI_148790	16	63	DIFFERENTIABLE	283
C4LWS2	C4LWS2_ENTHI	Alcohol dehydrogenase 3, putative	EHI_198760	19	62	SUPERSET	142	Q24857
O15593	O15593_ENTHI	Actin		5	60	DIFFERENTIABLE	123
C4M1M6	C4M1M6_ENTHI	Thioredoxin, putative	EHI_133970	20	58	DISCRETE	50
Q01958	CPP2_ENTHI	Histolysain	CPP2	16	58	SUPERSET	195	S0AUZ1, S0AW34, S0AWK6, S0AXH6, S0AYW8
S0AYR1	S0AYR1_ENTHI	Alcohol dehydrogenase 3, putative		18	57	DIFFERENTIABLE	142
C4M296	C4M296_ENTHI	Calreticulin, putative	EHI_136160	16	56	DISCRETE	189
C4M3S5	C4M3S5_ENTHI	Heat shock protein 70, putative	EHI_052860	19	54	DIFFERENTIABLE	17
S0AW68	S0AW68_ENTHI	Alcohol dehydrogenase 3, putative		18	54	DIFFERENTIABLE	142
S0AW50	S0AW50_ENTHI	Alcohol dehydrogenase 3, putative		17	54	DIFFERENTIABLE	142
S0AXW2	S0AXW2_ENTHI	Cysteine proteinase 2		15	51	DIFFERENTIABLE	195
B1N2J0	B1N2J0_ENTHI	Malic enzyme, putative	EHI_050330	20	51	DIFFERENTIABLE	30
C4M5V0	C4M5V0_ENTHI	Thioredoxin	EHI_026340	12	51	DIFFERENTIABLE	442
Q24813	Q24813_ENTHI	Nicotinamide nucleotide transhydrogenase		18	50	DIFFERENTIABLE	467
C4LVY0	C4LVY0_ENTHI	Alcohol dehydrogenase, putative	EHI_125950	17	50	SUPERSET	485	S0AVS6, S0AX09, S0B069, S0B0T1
S0AWM3	S0AWM3_ENTHI	Alcohol dehydrogenase, putative		17	50	DIFFERENTIABLE	485
S0AW44	S0AW44_ENTHI	Malic enzyme, putative		18	48	DIFFERENTIABLE	30
C4LUR3	C4LUR3_ENTHI	Cysteine protease binding protein family 6	cpbf6	13	47	DISCRETE	249
C4M6Z7	C4M6Z7_ENTHI	Triosephosphate isomerase	EHI_056480	20	47	SUPERSET	53
C4LUP7	C4LUP7_ENTHI	Alpha-amylase family protein	EHI_023360	19	45	DIFFERENTIABLE	152
G5EKL5	G5EKL5_ENTHI	Malic enzyme	ME	18	45	DIFFERENTIABLE	30
S0AZU7	S0AZU7_ENTHI	Phosphoglycerate kinase		15	45	DIFFERENTIABLE	318
C4M192	C4M192_ENTHI	Phosphoglycerate kinase	EHI_188180	15	45	SUPERSET	318
C4M1E4	C4M1E4_ENTHI	Putative uncharacterized protein	EHI_030750	25	42	DIFFERENTIABLE	16
C4LZX1	C4LZX1_ENTHI	Molybdenum cofactor sulfurase putative	EHI_194600	19	39	DISCRETE	235
C4LWQ8	C4LWQ8_ENTHI	Putative uncharacterized protein	EHI_198620	23	39	DIFFERENTIABLE	16
C4MBJ7	C4MBJ7_ENTHI	Copine, putative	EHI_163260	10	36	DIFFERENTIABLE	42
C4LXD7	C4LXD7_ENTHI	Fructose-1,6-bisphosphate aldolase, putative	EHI_098570	16	36	SUPERSET	3
C4M7C8	C4M7C8_ENTHI	Beta-hexosaminidase	EHI_007330	12	33	EQUIVALENT	186	Q86M34
C4MAZ9	C4MAZ9_ENTHI	N-acetylmuraminidase, putative	EHI_176820	11	33	DISCRETE	698
S0AZA2	S0AZA2_ENTHI	Copine, putative		10	31	DIFFERENTIABLE	42
C4MA90	C4MA90_ENTHI	Putative uncharacterized protein	EHI_039860	12	30	DISCRETE	4
C4LYJ7	C4LYJ7_ENTHI	Galactokinase, putative	EHI_094100	10	30	DISCRETE	570
C4M307	C4M307_ENTHI	Cysteine proteinase 1, putative	EHI_074180	10	28	SUPERSET	195	Q01957, S0AV81, S0AV92, S0AW39, S0AW79, S0AW85, S0AWI9, S0AWZ7, S0AXQ6, S0AYY3, S0AZB3, S0AZR5
C4M8M7	C4M8M7_ENTHI	Putative uncharacterized protein	EHI_114320	9	28	DISCRETE	113
B1N486	B1N486_ENTHI	Heat shock protein 70, putative	EHI_188610	9	28	SUPERSET	17	C4LZ45, C4M1G4, C4M9V9
P36185	ACP2_ENTHI	Cysteine proteinase ACP2	ACP2	10	28	DIFFERENTIABLE	195
Q8MZT6	Q8MZT6_ENTHI	Gal/GalNAc lectin heavy subunit region C	hgl	10	28	DIFFERENTIABLE	24
B1N306	B1N306_ENTHI	Elongation factor 2	EHI_166810	12	28	SUPERSET	120	C4M4N3
C4LY96	C4LY96_ENTHI	Putative uncharacterized protein	EHI_166920	20	28	DIFFERENTIABLE	16
B1N2L3	B1N2L3_ENTHI	Galactose-specific adhesin light subunit, putative	EHI_049690	9	27	SUPERSET	283	Q24846
C4M7K9	C4M7K9_ENTHI	Thioredoxin	EHI_170420	5	27	DIFFERENTIABLE	442
B1N2F9	B1N2F9_ENTHI	Type A flavoprotein, putative	EHI_152650	10	27	SUPERSET	372	S0AWK7, S0B0Z9
C4M525	C4M525_ENTHI	Peptidyl-prolyl cis-trans isomerase	EHI_128100	11	26	DISCRETE	259
C4LXZ9	C4LXZ9_ENTHI	Galactose-inhibitable lectin 35 kDa subunit	EHI_035690	9	26	SUPERSET	283
O15601	O15601_ENTHI	Elongation factor 1 alpha		8	26	DIFFERENTIABLE	36
C4M342	C4M342_ENTHI	Cysteine protease binding protein family 8	cpbf8	13	26	DISCRETE	661
S0AV91	S0AV91_ENTHI	Cysteine proteinase 1, putative		10	25	DIFFERENTIABLE	195
C4M3S9	C4M3S9_ENTHI	90 kDa heat shock protein, putative	EHI_163480	12	25	DISCRETE	454
C4LWG9	C4LWG9_ENTHI	Lysozyme, putative	EHI_096570	5	24	EQUIVALENT	519	O97368
O15581	O15581_ENTHI	Elongation factor 1 alpha		5	23	DIFFERENTIABLE	36
B1N4A1	B1N4A1_ENTHI	Grainin, putative	EHI_120360	9	22	DIFFERENTIABLE	88
C4LVG4	C4LVG4_ENTHI	Actophorin, putative	EHI_197480	8	22	DISCRETE	281
C4LU87	C4LU87_ENTHI	Thioredoxin, putative	EHI_110350	10	21	DISCRETE	736
C4LSM1	C4LSM1_ENTHI	Ganglioside gm2 activator protein, putative	EHI_151800	5	21	DISCRETE	690
C4M5G9	C4M5G9_ENTHI	Galactose-inhibitable lectin, putative	EHI_058330	6	21	EQUIVALENT	283	S0B094
C4M818	C4M818_ENTHI	Transketolase, putative	EHI_002160	9	21	SUPERSET	166
O15603	O15603_ENTHI	NADH dependent alcohol dehydrogenase		5	21	DIFFERENTIABLE	142
C4MB21	C4MB21_ENTHI	Profilin	EHI_176140	7	20	SUPERSET	34	P49230
C4M2S1	C4M2S1_ENTHI	Putative uncharacterized protein	EHI_161040	6	19	DISCRETE	243
C4LTS5	C4LTS5_ENTHI	Uncharacterized protein	EHI_050520	6	19	EQUIVALENT	173	S0AWI2
C4M7F5	C4M7F5_ENTHI	Alcohol dehydrogenase, putative	EHI_166490	9	19	DIFFERENTIABLE	434
C4M784	C4M784_ENTHI	Putative uncharacterized protein	EHI_044370	10	18	DISCRETE	56
Q1EQ03	Q1EQ03_ENTHI	EhSyntaxin B	EHI_021410	7	18	DIFFERENTIABLE	348
S0B1T5	S0B1T5_ENTHI	Alcohol dehydrogenase, putative		9	18	DIFFERENTIABLE	434
C4M2I4	C4M2I4_ENTHI	Serine carboxypeptidase (S28) family protein	EHI_054530	7	17	DISCRETE	141
C4LV36	C4LV36_ENTHI	Vacuolar ATP synthase subunit E, putative	EHI_182550	5	16	DISCRETE	443
C4LV20	C4LV20_ENTHI	Vacuolar ATP synthase subunit C, putative	EHI_092600	8	16	DISCRETE	694
Q24809	Q24809_ENTHI	P-glycoprotein 6	EhPGP6	8	16	DIFFERENTIABLE	429
C4M1X3	C4M1X3_ENTHI	Cysteine protease binding protein family 1	cpbf1	8	16	DISCRETE	222
C4M8B0	C4M8B0_ENTHI	Ras family GTPase	EHI_058090	6	16	SUPERSET	532
C4M1Y2	C4M1Y2_ENTHI	Rab GDP dissociation inhibitor alpha, putative	EHI_164890	6	16	DIFFERENTIABLE	499
B1N309	B1N309_ENTHI	Rab GDP dissociation inhibitor alpha, putative	EHI_167060	6	16	SUPERSET	499
Q76N78	Q76N78_ENTHI	Profilin		6	16	DIFFERENTIABLE	34
C4LY85	C4LY85_ENTHI	Ubiquitin, putative	EHI_166800	4	16	SUPERSET	33	C4M760
C4LUM3	C4LUM3_ENTHI	NADP-dependent alcohol dehydrogenase	EHI_023110	7	16	SUPERSET	241	S0AXP2, S0AYE8
C4LTM6	C4LTM6_ENTHI	Serine-threonine-isoleucine rich protein, putative	EHI_012330	8	15	EQUIVALENT	827	C4MAX8
C4LU65	C4LU65_ENTHI	Vacuolar ATP synthase subunit H, putative	EHI_068750	6	14	DISCRETE	225
Q86D27	Q86D27_ENTHI	Methionine gamma-lyase	metg	7	14	DIFFERENTIABLE	436
Q95030	Q95030_ENTHI	Cysteine proteinase, putative	CP5	7	14	SUPERSET	431	S0AUZ5, S0AW83, S0AXA6, S0AXD8, S0AXX8, S0AZ47, S0B0T6
C4LVQ1	C4LVQ1_ENTHI	Actin-binding protein, cofilin/tropomyosin family	EHI_186840	4	14	DISCRETE	261
C4M4H1	C4M4H1_ENTHI	Aminoacyl-histidine dipeptidase, putative	EHI_042170	10	14	DIFFERENTIABLE	356
C4LX20	C4LX20_ENTHI	Superoxide dismutase	EHI_159160	6	14	SUPERSET	575	P34107
C4M9S5	C4M9S5_ENTHI	Adenylate kinase	EHI_135470	7	14	SUPERSET	265	O96907
C4LYM3	C4LYM3_ENTHI	Putative uncharacterized protein	EHI_118750	4	14	DISCRETE	422
C4M4P4	C4M4P4_ENTHI	Actin-binding protein, cofilin/tropomyosin family	EHI_168340	7	14	DISCRETE	398
C4M0X6	C4M0X6_ENTHI	Immuno-dominant variable surface antigen	EHI_015380	8	13	SUPERSET	569	Q05352
B1N3X3	B1N3X3_ENTHI	Putative uncharacterized protein	EHI_117690	4	13	DISCRETE	784
C4M8S6	C4M8S6_ENTHI	Acid phosphatase, putative	EHI_146950	5	13	DISCRETE	747
C4LYI8	C4LYI8_ENTHI	Putative uncharacterized protein	EHI_093970	6	13	DISCRETE	82
C4LXK4	C4LXK4_ENTHI	Fe-hydrogenase, putative	EHI_073390	8	13	SUPERSET	400	Q9GTX0, S0AXI4
C4M946	C4M946_ENTHI	Putative uncharacterized protein	EHI_083620	8	13	DISCRETE	125
O15729	O15729_ENTHI	Peptidyl-prolyl cis-trans isomerase	CYP1	5	13	DISCRETE	308
C4M5I6	C4M5I6_ENTHI	Actin-like protein, putative	EHI_111050	7	13	SUPERSET	812	S0AWX7
Q24804	Q24804_ENTHI	Rap homologue 1	EhRAP1	4	12	DIFFERENTIABLE	532
C4M5Z7	C4M5Z7_ENTHI	Rho family GTPase	EHI_181250	4	12	SUPERSET	5	C4M8K6, Q24814
C4LTW4	C4LTW4_ENTHI	2,3-bisphosphoglycerate-independent phosphoglycerate mutase, putative	EHI_050940	9	12	DIFFERENTIABLE	327
C4M213	C4M213_ENTHI	Malate dehydrogenase, putative	EHI_165350	7	12	SUPERSET	471	S0AXV8
B1N330	B1N330_ENTHI	Serine-threonine-isoleucine rich protein, putative	EHI_004340	6	11	DIFFERENTIABLE	827
C4LY71	C4LY71_ENTHI	Putative uncharacterized protein	EHI_051760	3	11	DISCRETE	215
C4LV37	C4LV37_ENTHI	Vacuolar ATP synthase subunit E, putative	EHI_182560	4	11	DISCRETE	159
C4LVD3	C4LVD3_ENTHI	Sulfate adenylyltransferase, putative	EHI_197160	6	11	SUPERSET	369	O76156
C4M0F4	C4M0F4_ENTHI	14-3-3 protein 3	EHI_006810	5	11	DIFFERENTIABLE	96
Q5NT41	Q5NT41_ENTHI	Small GTPase EhRabC3	EhRabC3	5	11	DIFFERENTIABLE	103
C4M5S9	C4M5S9_ENTHI	L-myo-inositol-1-phosphate synthase	EHI_070720	6	11	DIFFERENTIABLE	45
C4M6R1	C4M6R1_ENTHI	Alcohol dehydrogenase, putative	EHI_088020	4	11	DIFFERENTIABLE	142
Q869B1	Q869B1_ENTHI	Fe-hydrogenase, putative	EHI_005060	5	11	DISCRETE	314
C4LWU6	C4LWU6_ENTHI	Calponin homology domain protein, putative	EHI_199000	6	11	DIFFERENTIABLE	85
C4M6Y9	C4M6Y9_ENTHI	V-type ATPase, D subunit, putative	EHI_056390	5	10	DISCRETE	206
S0AXJ4	S0AXJ4_ENTHI	Uncharacterized protein		4	10	DIFFERENTIABLE	1190
C4LY32	C4LY32_ENTHI	Putative uncharacterized protein	EHI_177180	5	10	DISCRETE	545
C4M3U5	C4M3U5_ENTHI	Proteasome subunit alpha type	EHI_163650	4	10	EQUIVALENT	604	C4MA29
C4LT26	C4LT26_ENTHI	4-alpha-glucanotransferase, putative	EHI_148560	8	10	DIFFERENTIABLE	185
Q5NT28	Q5NT28_ENTHI	Small GTPase EhRab2B	EhRab2B	4	10	DIFFERENTIABLE	164
Q5NT27	Q5NT27_ENTHI	Small GTPase EhRab2C	EhRab2C	4	10	DIFFERENTIABLE	164
Q5NT05	Q5NT05_ENTHI	Rab family GTPase	EhRabX11	5	10	DISCRETE	415
C4LYN0	C4LYN0_ENTHI	Putative uncharacterized protein	EHI_118820	4	9	DISCRETE	47
C4M1J9	C4M1J9_ENTHI	4-alpha-glucanotransferase, putative	EHI_084680	5	9	DISCRETE	328
C4M9P2	C4M9P2_ENTHI	Filopodin, putative	EHI_080740	6	9	DIFFERENTIABLE	40
C4M220	C4M220_ENTHI	Aspartate ammonia-lyase, putative	EHI_150390	2	9	DIFFERENTIABLE	231
C4M882	C4M882_ENTHI	Uncharacterized protein	EHI_098800	6	9	DISCRETE	679
C4LU31	C4LU31_ENTHI	Thioredoxin, putative	EHI_068390	4	8	EQUIVALENT	494	C4LUL8
B1N5G3	B1N5G3_ENTHI	Cysteine proteinase, putative	EHI_010850	3	8	EQUIVALENT	1218	Q8I8E0
C4LV53	C4LV53_ENTHI	Dipeptidyl-peptidase, putative	EHI_182720	4	8	DISCRETE	391
C4M474	C4M474_ENTHI	Copine, putative	EHI_140260	4	8	DISCRETE	11
C4M261	C4M261_ENTHI	Skp1 protein, putative	EHI_174130	3	8	DISCRETE	396
C4M779	C4M779_ENTHI	Putative uncharacterized protein	EHI_199660	4	8	DISCRETE	233
Q9BLF2	Q9BLF2_ENTHI	Small GTPase RabC1	EhRabC1	5	8	DIFFERENTIABLE	103
C4M2S3	C4M2S3_ENTHI	Putative uncharacterized protein	EHI_161070	3	8	EQUIVALENT	128	S0AUR0
C4M2Y7	C4M2Y7_ENTHI	Purine nucleoside phosphorylase, putative	EHI_048740	4	8	DISCRETE	78
C4M479	C4M479_ENTHI	Putative uncharacterized protein	EHI_140310	4	7	DISCRETE	370
C4M2S8	C4M2S8_ENTHI	Steroid 5-alpha reductase, putative	EHI_076870	3	7	DISCRETE	274
C4M934	C4M934_ENTHI	Putative uncharacterized protein	EHI_097630	4	7	DISCRETE	155
C4LYT1	C4LYT1_ENTHI	Putative uncharacterized protein	EHI_010340	3	7	SUPERSET	132	S0AZK4
Q9BLE4	Q9BLE4_ENTHI	Small GTPase Rab11B	EhRab11B	6	7	DIFFERENTIABLE	299
C4M5Q7	C4M5Q7_ENTHI	Rho family GTPase	EHI_129750	5	7	DIFFERENTIABLE	5
C4M7U0	C4M7U0_ENTHI	40S ribosomal protein S2, putative	EHI_020280	4	7	SUPERSET	401	S0AVL0
C4M295	C4M295_ENTHI	Adenylyl cyclase-associated protein	EHI_136150	3	7	DIFFERENTIABLE	347
Q27647	Q27647_ENTHI	Hexokinase	HXK1	4	7	SUPERSET	18	S0AW62, S0AWG9
C4M8N5	C4M8N5_ENTHI	Putative uncharacterized protein	EHI_077530	3	6	DISCRETE	559
C4LWC1	C4LWC1_ENTHI	Putative uncharacterized protein	EHI_155720	3	6	DISCRETE	236
C4LUQ2	C4LUQ2_ENTHI	Glucosidase, putative	EHI_023430	3	6	DISCRETE	1163
C4LTT0	C4LTT0_ENTHI	Cysteine proteinase, putative	EHI_050570	3	6	EQUIVALENT	352	Q27643, S0AYX0, S0AZC0
C4M2H3	C4M2H3_ENTHI	Cysteine protease binding protein family 7	cpbf7	4	6	DISCRETE	552
B1N4X5	B1N4X5_ENTHI	Putative uncharacterized protein	EHI_085720	4	6	EQUIVALENT	1036	C4LW18
C4LU03	C4LU03_ENTHI	Serine carboxypeptidase (S28) family protein	EHI_068090	2	6	DISCRETE	949
C4M363	C4M363_ENTHI	Proteasome alpha subunit, putative	EHI_086080	3	6	DISCRETE	549
Q6AW60	Q6AW60_ENTHI	EhRab11A protein	EhRAB11A	5	6	DIFFERENTIABLE	299
C4LWX8	C4LWX8_ENTHI	Putative uncharacterized protein	EHI_127030	4	6	DISCRETE	289
C4LUL4	C4LUL4_ENTHI	Proteasome subunit alpha type	EHI_004760	3	6	EQUIVALENT	1143	Q94561, S0AWH2
C4LWJ2	C4LWJ2_ENTHI	Phosphorylase	EHI_096830	3	6	DIFFERENTIABLE	216
C4LSY9	C4LSY9_ENTHI	Ran family GTPase	EHI_148190	3	6	DISCRETE	58
Q9BLF3	Q9BLF3_ENTHI	Small GTPase Rab1A	EhRab1A	4	6	DIFFERENTIABLE	277
C4MB71	C4MB71_ENTHI	19S cap proteasome S2 subunit	EHI_198010	5	6	DIFFERENTIABLE	518
C4M9B0	C4M9B0_ENTHI	60S ribosomal protein L9, putative	EHI_193080	3	6	DIFFERENTIABLE	322
C4LSV1	C4LSV1_ENTHI	Malate dehydrogenase	EHI_152670	2	6	DIFFERENTIABLE	145
Q86S08	Q86S08_ENTHI	Malate dehydrogenase	Mdh1	2	6	DIFFERENTIABLE	145
Q24861	Q24861_ENTHI	20 kDa antigen		3	6	DIFFERENTIABLE	175
C4M0L4	C4M0L4_ENTHI	Aminopeptidase, putative	EHI_008380	3	6	DISCRETE	503
C4M5C4	C4M5C4_ENTHI	Enhancer binding protein-1	EHI_121780	4	6	SUPERSET	298
C4LTV9	C4LTV9_ENTHI	Uncharacterized protein	EHI_050890	3	5	DIFFERENTIABLE	807
C4LV34	C4LV34_ENTHI	Putative uncharacterized protein	EHI_182530	2	5	DISCRETE	752
C4MAS9	C4MAS9_ENTHI	Methionine gamma-lyase	EHI_144610	1	5	SUPERSET	436	S0AW11
C4M5K9	C4M5K9_ENTHI	Heat shock protein 70 family	EHI_001950	3	5	DISCRETE	160
C4M758	C4M758_ENTHI	Alpha-NAC protein, putative	EHI_083250	2	5	EQUIVALENT	76	S0AX48
C4LWP4	C4LWP4_ENTHI	Uncharacterized protein	EHI_069560	3	5	DISCRETE	183
C4M4A8	C4M4A8_ENTHI	Protein transport protein SEC61 gamma subunit, putative	EHI_048170	1	5	DISCRETE	481
B1N2H1	B1N2H1_ENTHI	T-complex protein 1 subunit eta, putative	EHI_044940	2	5	EQUIVALENT	12	C4M759
C4LUQ9	C4LUQ9_ENTHI	Calmodulin, putative	EHI_023500	3	5	DISCRETE	41
C4M6Y2	C4M6Y2_ENTHI	Polyadenylate-binding protein, putative	EHI_033250	3	5	EQUIVALENT	294	S0AYB2
C4LWZ3	C4LWZ3_ENTHI	60S ribosomal protein L2/L8, putative	EHI_150470	2	5	SUPERSET	495
C4M3N6	C4M3N6_ENTHI	F-actin capping protein alpha subunit, putative	EHI_033740	2	5	DISCRETE	743
C4LXM0	C4LXM0_ENTHI	40S ribosomal protein S15a, putative	EHI_105140	2	5	DISCRETE	892
Q1EQ51	Q1EQ51_ENTHI	EhSec31	EHI_103410	3	5	DISCRETE	117
C4LVN8	C4LVN8_ENTHI	Translation initiation factor eIF-5A, putative	EHI_186480	4	5	DIFFERENTIABLE	137
B1N2S4	B1N2S4_ENTHI	WD repeat protein 2, putative	EHI_142190	3	5	SUPERSET	723	C4LZ00
C4LT02	C4LT02_ENTHI	40S ribosomal protein S3, putative	EHI_146340	3	5	EQUIVALENT	179	S0AZJ3
C4LXG4	C4LXG4_ENTHI	Purine nucleoside phosphorylase, putative	EHI_130960	3	5	SUPERSET	557	S0AXJ9, S0AXL9
C4LXT9	C4LXT9_ENTHI	Endoribonuclease L-PSP, putative	EHI_087570	3	5	DISCRETE	646
C4M126	C4M126_ENTHI	Putative uncharacterized protein	EHI_105210	2	5	DISCRETE	212
C4LZC2	C4LZC2_ENTHI	Pyrophosphate-dependent phosphofructokinase	EHI_000730	3	5	SUPERSET	380	S0AWD4
Q27648	Q27648_ENTHI	Hexokinase	HXK2	3	5	DIFFERENTIABLE	18
C4LT65	C4LT65_ENTHI	Heat shock protein 70, putative	EHI_148990	1	4	DISCRETE	349
C4M916	C4M916_ENTHI	Copine, putative	EHI_192760	2	4	DISCRETE	849
C4LX23	C4LX23_ENTHI	RhoGAP domain containing protein	EHI_159300	2	4	DISCRETE	987
C4M6M0	C4M6M0_ENTHI	Putative uncharacterized protein	EHI_147440	1	4	DISCRETE	1224
C4M741	C4M741_ENTHI	Cortexillin, putative	EHI_191900	2	4	DISCRETE	1299
C4MA45	C4MA45_ENTHI	Putative uncharacterized protein	EHI_067090	2	4	DISCRETE	254
C4M7T9	C4M7T9_ENTHI	Ubiquitin-activating enzyme, putative	EHI_020270	2	4	DIFFERENTIABLE	627
C4LWN9	C4LWN9_ENTHI	Putative uncharacterized protein	EHI_069510	2	4	DISCRETE	286
C4M8G8	C4M8G8_ENTHI	Serine/threonine protein kinase, putative	EHI_063010	1	4	DISCRETE	1225
B1N3U1	B1N3U1_ENTHI	P-glycoprotein 6, putative	EHI_081130	2	4	DIFFERENTIABLE	429
C4LVL3	C4LVL3_ENTHI	Soluble calcium-activated nucleotidase 1, putative	EHI_103690	2	4	EQUIVALENT	395	S0AZ15
C4LYD1	C4LYD1_ENTHI	V-type proton ATPase subunit F	EHI_007940	1	4	DISCRETE	1761
C4M310	C4M310_ENTHI	Ubiquitin-conjugating enzyme family protein	EHI_025230	2	4	DISCRETE	717
C4M4I6	C4M4I6_ENTHI	Putative uncharacterized protein	EHI_138950	1	4	DISCRETE	1266
C4LWU1	C4LWU1_ENTHI	WD-repeat protein	EHI_198950	1	4	DIFFERENTIABLE	181
C4LZR0	C4LZR0_ENTHI	WD repeat protein	EHI_038880	1	4	DIFFERENTIABLE	181
C4M7M4	C4M7M4_ENTHI	Cell surface protease gp63, putative	EHI_200230	3	4	DISCRETE	998
Q9BLE8	Q9BLE8_ENTHI	Small GTPase Rab7A	EhRab7A	2	4	SUPERSET	188	Q9NHW8
C4LZ69	C4LZ69_ENTHI	13 kDa ribonucleoprotein-associated protein, putative	EHI_104600	2	4	DIFFERENTIABLE	62
C4M8P0	C4M8P0_ENTHI	13 kDa ribonucleoprotein-associated protein, putative	EHI_053440	2	4	DIFFERENTIABLE	62
B1N3T5	B1N3T5_ENTHI	Vacuolar protein sorting-associated protein 45, putative	EHI_154290	3	4	DIFFERENTIABLE	87
C4M451	C4M451_ENTHI	Proteasome regulatory subunit, putative	EHI_030170	1	4	DISCRETE	412
Q24834	Q24834_ENTHI	Disulphide oxidoreductase	gEh-34 KDa protein	3	4	DIFFERENTIABLE	405
Q1EPY2	Q1EPY2_ENTHI	EhVps45A	EHI_160900	3	4	DIFFERENTIABLE	87
C4LT56	C4LT56_ENTHI	Calmodulin, putative	EHI_148890	3	4	DIFFERENTIABLE	273
B1N368	B1N368_ENTHI	Putative uncharacterized protein	EHI_065490	2	4	DISCRETE	118
C4LUB9	C4LUB9_ENTHI	PCTP-like protein, putative	EHI_110720	1	4	EQUIVALENT	1015	C4M0E1
C4LX05	C4LX05_ENTHI	60S ribosomal protein L17, putative	EHI_127330	1	4	EQUIVALENT	337	C4M0M6
C4M483	C4M483_ENTHI	G protein alpha subunit, putative	EHI_140350	3	4	DISCRETE	133
Q5NT23	Q5NT23_ENTHI	Small GTPase EhRabK1	EhRabK1	1	4	DISCRETE	820
C4M2J3	C4M2J3_ENTHI	60S ribosomal protein L17, putative	EHI_054740	1	4	DIFFERENTIABLE	337
C4LY16	C4LY16_ENTHI	Calcium binding family protein	EHI_177620	3	4	DIFFERENTIABLE	273
C4M059	C4M059_ENTHI	40S ribosomal protein S28, putative	EHI_021450	1	4	DIFFERENTIABLE	227
S0AVS1	S0AVS1_ENTHI	40S ribosomal protein S2, putative		3	4	DIFFERENTIABLE	401
Q8WQT5	Q8WQT5_ENTHI	Phosphorylase		2	4	DIFFERENTIABLE	216
C4M3I0	C4M3I0_ENTHI	Phosphorylase	EHI_138380	2	4	DIFFERENTIABLE	216
B1N2I3	B1N2I3_ENTHI	40S ribosomal protein S14, putative	EHI_074090	3	4	DIFFERENTIABLE	296
C4LVZ9	C4LVZ9_ENTHI	60S ribosomal protein L9, putative	EHI_126140	2	4	DIFFERENTIABLE	322
C4LW95	C4LW95_ENTHI	Thioredoxin reductase	EHI_155440	3	4	SUPERSET	405
C4LXB1	C4LXB1_ENTHI	14-3-3 protein 2	EHI_098280	2	4	SUPERSET	96
C4M7W2	C4M7W2_ENTHI	Aldose reductase, putative	EHI_029620	3	4	SUPERSET	49
C4M8C2	C4M8C2_ENTHI	Aldose reductase, putative	EHI_039190	3	4	DIFFERENTIABLE	49
C4M782	C4M782_ENTHI	ARP2/3 complex 34 kDa subunit, putative	EHI_091250	2	4	DIFFERENTIABLE	521
C4LWF5	C4LWF5_ENTHI	LIM zinc finger domain containing protein	EHI_096420	2	4	DISCRETE	463
C4M0S1	C4M0S1_ENTHI	Xaa-Pro dipeptidase, putative	EHI_010070	3	4	DIFFERENTIABLE	681
C4LWT9	C4LWT9_ENTHI	Actin, putative	EHI_198930	3	4	SUPERSET	468	S0AWV9
C4M7M1	C4M7M1_ENTHI	Purine nucleoside phosphorylase, putative	EHI_200080	2	4	DISCRETE	8
C4LU66	C4LU66_ENTHI	Phosphoglucomutase	PGM	3	4	EQUIVALENT	51	O15820
C4M6H3	C4M6H3_ENTHI	NAD(FAD)-dependent dehydrogenase, putative	EHI_099700	4	4	DIFFERENTIABLE	293
C4LXD1	C4LXD1_ENTHI	Putative uncharacterized protein	EHI_098510	3	3	DIFFERENTIABLE	110
C4M0V2	C4M0V2_ENTHI	Multidrug resistance protein, putative	EHI_100320	1	3	DISCRETE	529
C4M031	C4M031_ENTHI	Putative uncharacterized protein	EHI_134820	1	3	DISCRETE	626
C4M3L8	C4M3L8_ENTHI	Putative uncharacterized protein	EHI_110000	2	3	DISCRETE	634
C4MBF5	C4MBF5_ENTHI	Putative uncharacterized protein	EHI_161640	1	3	DISCRETE	1335
Q9U593	Q9U593_ENTHI	Dipeptidyl-peptidase, putative	dpp	2	3	DIFFERENTIABLE	643
C4M3X0	C4M3X0_ENTHI	Plasma membrane calcium-transporting ATPase, putative	EHI_016480	2	3	DIFFERENTIABLE	547
C4M515	C4M515_ENTHI	HEAT repeat domain containing protein	EHI_141090	1	3	DISCRETE	1037
C4LWK6	C4LWK6_ENTHI	Rho GTPase activating protein, putative	EHI_069180	1	3	DISCRETE	1715
C4M942	C4M942_ENTHI	Peptidyl-prolyl cis-trans isomerase	EHI_083580	1	3	DISCRETE	1346
Q27642	Q27642_ENTHI	Putative plasma membrane calcium ion-transporting ATPase		2	3	DIFFERENTIABLE	547
C4M2C4	C4M2C4_ENTHI	Hsc70-interacting protein, putative	EHI_158050	2	3	DISCRETE	73
C4M4E1	C4M4E1_ENTHI	Putative uncharacterized protein	EHI_156420	2	3	DIFFERENTIABLE	582
C4M0I0	C4M0I0_ENTHI	Putative uncharacterized protein	EHI_024350	2	3	DISCRETE	126
C4M343	C4M343_ENTHI	V-type ATPase, C subunit, putative	EHI_059840	2	3	EQUIVALENT	682	Q24810
C4M6S2	C4M6S2_ENTHI	60S ribosomal protein L14, putative	EHI_184470	2	3	SUPERSET	768	C4M8C9
C4M0Y0	C4M0Y0_ENTHI	Rho family GTPase	EHI_015440	2	3	SUPERSET	860	C4M4W4, Q8I891, Q8I892, Q8I894, Q95TD4
C4M0M9	C4M0M9_ENTHI	60S ribosomal protein L37a, putative	EHI_008650	1	3	DIFFERENTIABLE	883
C4M472	C4M472_ENTHI	Deoxycytidine triphosphate deaminase, putative	EHI_140240	2	3	DISCRETE	776
C4MAK2	C4MAK2_ENTHI	Uncharacterized protein	EHI_017000	2	3	DIFFERENTIABLE	430
C4M419	C4M419_ENTHI	T-complex protein 1 subunit delta	EHI_114120	2	3	DIFFERENTIABLE	230
C4LSZ3	C4LSZ3_ENTHI	60S ribosomal protein L37a, putative	EHI_148230	1	3	DIFFERENTIABLE	883
C4LU92	C4LU92_ENTHI	Guanine nucleotide-binding protein subunit beta 2-like 1, putative	EHI_110400	2	3	DIFFERENTIABLE	1173
C4LWQ4	C4LWQ4_ENTHI	Putative uncharacterized protein	EHI_198580	2	3	DISCRETE	353
B1N341	B1N341_ENTHI	Cortexillin, putative	EHI_104560	3	3	DIFFERENTIABLE	469
B1N5A6	B1N5A6_ENTHI	Putative uncharacterized protein	EHI_154450	2	3	DISCRETE	697
C4LZG9	C4LZG9_ENTHI	60S ribosomal protein L11, putative	EHI_199970	1	3	EQUIVALENT	437	C4LZP2
B1N3Y5	B1N3Y5_ENTHI	Bifunctional short chain isoprenyl diphosphate synthase, putative	EHI_142720	2	3	SUPERSET	578	C4M111
C4LTB5	C4LTB5_ENTHI	Actin-related protein 2/3 complex subunit 1A, putative	EHI_045000	2	3	DIFFERENTIABLE	232
C4LYJ9	C4LYJ9_ENTHI	ARP2/3 complex 41 kDa subunit, putative	EHI_094120	2	3	SUPERSET	232	S0AVM3
C4LUI9	C4LUI9_ENTHI	Threonine dehydratase, putative	EhTD2	2	3	DIFFERENTIABLE	139
C4LT81	C4LT81_ENTHI	40S ribosomal protein S5, putative	EHI_137870	2	3	DIFFERENTIABLE	550
C4M6L6	C4M6L6_ENTHI	Rho GDP exchange inhibitor, putative	EHI_147570	2	3	DIFFERENTIABLE	114
C4M8B5	C4M8B5_ENTHI	Putative uncharacterized protein	EHI_101240	2	3	DISCRETE	210
C4M3P6	C4M3P6_ENTHI	Putative uncharacterized protein	EHI_140740	2	3	DIFFERENTIABLE	115
S0AZN9	S0AZN9_ENTHI	40S ribosomal protein SA		1	3	DIFFERENTIABLE	221
C4LYR0	C4LYR0_ENTHI	Thioredoxin	EHI_004490	2	3	DISCRETE	338
C4M5A0	C4M5A0_ENTHI	40S ribosomal protein SA	EHI_081410	1	3	SUPERSET	221
C4LYI1	C4LYI1_ENTHI	DEAD/DEAH box helicase, putative	EHI_093900	3	3	DISCRETE	300
C4LVB2	C4LVB2_ENTHI	Heat shock protein 90, putative	EHI_196940	2	3	SUPERSET	251	C4MBP1
C4LTV0	C4LTV0_ENTHI	Putative uncharacterized protein	EHI_050800	1	2	EQUIVALENT	1410	S0AZA7
C4LYV8	C4LYV8_ENTHI	Putative uncharacterized protein	EHI_010710	1	2	DISCRETE	1142
C4M0E6	C4M0E6_ENTHI	Putative uncharacterized protein	EHI_006730	1	2	DISCRETE	1212
C4M1H6	C4M1H6_ENTHI	Beta-amylase, putative	EHI_192590	2	2	DIFFERENTIABLE	630
C4M2H5	C4M2H5_ENTHI	Cysteine protease inhibitor 2 (EhICP2)	EHI_040460	1	2	SUPERSET	919	Q4GZL2
C4M512	C4M512_ENTHI	Acid phosphatase, putative	EHI_141060	2	2	DISCRETE	1648
C4M9K5	C4M9K5_ENTHI	ARF GTPase activating protein, putative	EHI_189140	2	2	DISCRETE	245
Q4QT07	Q4QT07_ENTHI	Rab GTPase		1	2	DIFFERENTIABLE	1318
C4LT85	C4LT85_ENTHI	Protein kinase, putative	EHI_044640	1	2	DISCRETE	916
C4M247	C4M247_ENTHI	Ribonuclease, putative	EHI_169300	1	2	DIFFERENTIABLE	355
C4M8V7	C4M8V7_ENTHI	Putative uncharacterized protein	EHI_113910	1	2	DISCRETE	1062
B1N2N4	B1N2N4_ENTHI	Threonine dehydratase	EhTD1	1	2	SUPERSET	1425	C4LVZ3
C4LXY2	C4LXY2_ENTHI	Uncharacterized protein	EHI_035510	1	2	DISCRETE	377
C4LZH6	C4LZH6_ENTHI	Thioredoxin, putative	EHI_124400	2	2	DISCRETE	687
Q1EPZ7	Q1EPZ7_ENTHI	EhSyntaxin G	EHI_068480	1	2	DISCRETE	817
Q1EQ22	Q1EQ22_ENTHI	AP-2 complex protein, putative	EHI_045710	1	2	DISCRETE	1086
C4M3A9	C4M3A9_ENTHI	Putative uncharacterized protein	EHI_175420	1	2	DISCRETE	1357
C4M6J3	C4M6J3_ENTHI	Grainin, putative	EHI_060380	1	2	DISCRETE	174
C4M8T2	C4M8T2_ENTHI	Long-chain-fatty-acid--CoA ligase, putative	EHI_147010	1	2	DIFFERENTIABLE	655
Q9NDI3	Q9NDI3_ENTHI	Rab B GTPase	rabB	1	2	DIFFERENTIABLE	1318
Q1EQ40	Q1EQ40_ENTHI	EhEmp24D	EHI_038590	1	2	DISCRETE	1069
C4M4D1	C4M4D1_ENTHI	Ribonuclease, putative	EHI_156310	1	2	DIFFERENTIABLE	355
Q5NT39	Q5NT39_ENTHI	Small GTPase EhRabC5	EhRabC5	1	2	DIFFERENTIABLE	103
Q6AW62	Q6AW62_ENTHI	EhRab7G protein	EhRAB7G	1	2	DIFFERENTIABLE	277
Q5NSZ7	Q5NSZ7_ENTHI	Rab-19, putative	EhRabX19	1	2	DISCRETE	1136
C4M846	C4M846_ENTHI	26s protease regulatory subunit	EHI_052050	2	2	DIFFERENTIABLE	382
C4M4A2	C4M4A2_ENTHI	Proteasome subunit alpha type	EHI_098060	1	2	EQUIVALENT	564	C4MAW8, S0AWR8
C4M7U7	C4M7U7_ENTHI	Uncharacterized protein	EHI_020350	1	2	DISCRETE	764
Q963D1	Q963D1_ENTHI	Small GTP-binding protein Rab8	rab8	1	2	DIFFERENTIABLE	277
C4LSR0	C4LSR0_ENTHI	Putative uncharacterized protein	EHI_152220	2	2	DIFFERENTIABLE	942
C4M2E3	C4M2E3_ENTHI	3-ketoacyl-CoA synthase	EHI_158240	2	2	DIFFERENTIABLE	106
C4M3E2	C4M3E2_ENTHI	Putative uncharacterized protein	EHI_095850	1	2	DIFFERENTIABLE	800
Q24806	Q24806_ENTHI	Ras homologue 1	Ehras1	2	2	DIFFERENTIABLE	388
Q5EHP7	Q5EHP7_ENTHI	G protein-coupled receptor 1	EHI_025100	1	2	DISCRETE	25
C4LZJ5	C4LZJ5_ENTHI	Ras family GTPase	EHI_124610	2	2	EQUIVALENT	388	Q24807
C4M7Q6	C4M7Q6_ENTHI	Calcium-binding protein 1 (EhCBP1)	EHI_120900	2	2	EQUIVALENT	788	P38505
C4M982	C4M982_ENTHI	Inorganic pyrophosphatase, putative	EHI_124880	1	2	DISCRETE	669
C4LXG1	C4LXG1_ENTHI	Purine nucleoside phosphorylase, putative	EHI_130930	1	2	EQUIVALENT	572	S0AZI4
Q5NSY5	Q5NSY5_ENTHI	Rab family GTPase	EhRabX31	1	2	DISCRETE	438
C4LY22	C4LY22_ENTHI	Cdc48-like protein, putative	EHI_176970	1	2	DIFFERENTIABLE	368
C4LYV2	C4LYV2_ENTHI	60S ribosomal protein L7, putative	EHI_010650	1	2	SUPERSET	342	S0AYD9
C4LSX5	C4LSX5_ENTHI	Putative uncharacterized protein	EHI_148050	1	2	DISCRETE	93
C4LWT3	C4LWT3_ENTHI	Transcription factor BTF3, putative	EHI_198870	1	2	DIFFERENTIABLE	23
C4M4L8	C4M4L8_ENTHI	Small GTPase Sar1	EHI_031410	1	2	DIFFERENTIABLE	190
C4M3D4	C4M3D4_ENTHI	RNA-binding protein, putative	EHI_053170	1	2	EQUIVALENT	1108	S0AWK1
Q9BI08	Q9BI08_ENTHI	Vacuolar protein sorting 29	vsp	2	2	DISCRETE	1392
C4MBI6	C4MBI6_ENTHI	Calcineurin B subunit, putative	EHI_106670	1	2	DISCRETE	1473
B1N354	B1N354_ENTHI	Ras-1, putative	EHI_124520	1	2	DISCRETE	760
C4M3C0	C4M3C0_ENTHI	26S protease regulatory subunit, putative	EHI_053020	2	2	DIFFERENTIABLE	382
B1N384	B1N384_ENTHI	60S ribosomal protein L4, putative	EHI_064710	1	2	SUPERSET	68	S0AYF5, S0B2U7
C4M8E1	C4M8E1_ENTHI	Centromere/microtubule binding protein cbf5, putative	EHI_115300	1	2	DISCRETE	287
C4M2W9	C4M2W9_ENTHI	Putative uncharacterized protein	EHI_048560	1	2	DIFFERENTIABLE	23
C4LV64	C4LV64_ENTHI	Ribosomal protein L23A, putative	EHI_182850	2	2	EQUIVALENT	379	Q9XYW0
C4LXX7	C4LXX7_ENTHI	40S ribosomal protein S13, putative	EHI_035460	1	2	EQUIVALENT	330	C4M9M7
C4M5C6	C4M5C6_ENTHI	Deoxyribose-phosphate aldolase, putative	EHI_121800	1	2	DIFFERENTIABLE	252
B1N336	B1N336_ENTHI	40S ribosomal protein S4, putative	EHI_118170	1	2	SUPERSET	500	C4LYF4, S0AVH8, S0AZM5
C4M711	C4M711_ENTHI	Putative uncharacterized protein	EHI_189930	2	2	DISCRETE	202
C4M938	C4M938_ENTHI	60S ribosomal protein L7, putative	EHI_025830	1	2	DIFFERENTIABLE	342
C4M7Y2	C4M7Y2_ENTHI	Eukaryotic translation elongation factor 1 gamma, putative	EHI_119540	1	2	DIFFERENTIABLE	57
C4LT17	C4LT17_ENTHI	Aspartate--ammonia ligase, putative	EHI_148470	2	2	DISCRETE	662
C4M096	C4M096_ENTHI	F-actin capping protein beta subunit, putative	EHI_005020	1	2	SUPERSET	270	S0AV06, S0AXS0
C4M660	C4M660_ENTHI	60S acidic riboomal protein P1, putative	EHI_042920	1	2	DISCRETE	635
C4MA09	C4MA09_ENTHI	60S ribosomal protein L7, putative	EHI_146530	1	2	SUPERSET	342	S0AXE0
C4M2K7	C4M2K7_ENTHI	Methionyl-tRNA synthetase, putative	EHI_079860	1	2	DIFFERENTIABLE	409
C4M1P6	C4M1P6_ENTHI	Glutaminyl-tRNA synthetase, putative	EHI_062700	1	2	DISCRETE	695
C4LUW3	C4LUW3_ENTHI	40S ribosomal protein S9	EHI_179000	1	2	EQUIVALENT	97	O15612, S0AV16
O15635	O15635_ENTHI	Cysteine synthase A, putative	cysteine synthase type II	2	2	SUPERSET	822	S0AX08
C4M1E1	C4M1E1_ENTHI	60S ribosomal protein L12, putative	EHI_191750	1	2	DIFFERENTIABLE	887
S0AY83	S0AY83_ENTHI	60S ribosomal protein L4, putative		1	2	DIFFERENTIABLE	68
C4LZA2	C4LZA2_ENTHI	60S ribosomal protein L4, putative	EHI_000510	1	2	DIFFERENTIABLE	68
S0AWM8	S0AWM8_ENTHI	60S ribosomal protein L4, putative		1	2	SUPERSET	68
C4LYR5	C4LYR5_ENTHI	Putative uncharacterized protein	EHI_004550	1	2	DIFFERENTIABLE	343
C4LVZ6	C4LVZ6_ENTHI	40S ribosomal protein S5, putative	EHI_200850	1	2	DIFFERENTIABLE	550
C4LV48	C4LV48_ENTHI	Enhancer binding protein-2, putative	EHI_182670	1	2	DIFFERENTIABLE	64
C4LZW4	C4LZW4_ENTHI	LIM zinc finger domain containing protein	EHI_194520	1	2	DIFFERENTIABLE	730
C4LU56	C4LU56_ENTHI	60S ribosomal protein L5, putative	EHI_006860	2	2	DIFFERENTIABLE	32
S0AZP0	S0AZP0_ENTHI	Uncharacterized protein		2	2	DIFFERENTIABLE	819
C4M2R6	C4M2R6_ENTHI	Uncharacterized protein	EHI_160980	2	2	SUPERSET	819	S0AWH5, S0AXD7, S0B021, S0B0U6
C4M7X2	C4M7X2_ENTHI	Lysine--tRNA ligase	EHI_047810	1	2	DIFFERENTIABLE	409
P90545	P90545_ENTHI	EhABP	abp1	1	2	DIFFERENTIABLE	224
C4LZ72	C4LZ72_ENTHI	Filamin 2, putative	EHI_104630	1	2	DIFFERENTIABLE	224
C4LZN0	C4LZN0_ENTHI	Aspartyl-tRNA synthetase, putative	EHI_175050	1	2	DISCRETE	100
C4M5M6	C4M5M6_ENTHI	Coronin	EHI_122800	1	1	EQUIVALENT	823	Q9XYQ0
C4M6H8	C4M6H8_ENTHI	Mucin-2, putative	EHI_173410	1	1	DISCRETE	1150
C4M808	C4M808_ENTHI	Putative uncharacterized protein	EHI_143620	1	1	DISCRETE	1214
B1N443	B1N443_ENTHI	Putative uncharacterized protein	EHI_200010	1	1	DISCRETE	794
C4LSL0	C4LSL0_ENTHI	Putative uncharacterized protein	EHI_151690	1	1	DISCRETE	840
C4LSL1	C4LSL1_ENTHI	RhoGAP domain containing protein	EHI_151700	1	1	DISCRETE	1659
C4LT38	C4LT38_ENTHI	Putative uncharacterized protein	EHI_148680	1	1	DISCRETE	1518
C4LT45	C4LT45_ENTHI	Putative uncharacterized protein	EHI_148770	1	1	DISCRETE	1760
C4LU27	C4LU27_ENTHI	Putative uncharacterized protein	EHI_068340	1	1	DISCRETE	1541
C4LUZ1	C4LUZ1_ENTHI	Tyrosine kinase, putative	EHI_092260	1	1	DISCRETE	1116
C4LWY9	C4LWY9_ENTHI	Ribonuclease, putative	EHI_127160	1	1	DISCRETE	927
C4LXH9	C4LXH9_ENTHI	Putative uncharacterized protein	EHI_131110	1	1	DISCRETE	1204
C4LXQ1	C4LXQ1_ENTHI	RNA recognition motif domain containing protein	EHI_014120	1	1	DISCRETE	1160
C4LY20	C4LY20_ENTHI	Putative uncharacterized protein	EHI_177670	1	1	DISCRETE	1747
C4LYG2	C4LYG2_ENTHI	CXXC-rich protein	EHI_093710	1	1	DISCRETE	1632
C4LYV5	C4LYV5_ENTHI	Sand family protein	EHI_010680	1	1	DISCRETE	1417
C4LZ23	C4LZ23_ENTHI	Phospholipid-transporting P-type ATPase, putative	EHI_009460	1	1	DISCRETE	1003
C4LZ68	C4LZ68_ENTHI	Apyrase, putative	EHI_104590	1	1	DISCRETE	1206
C4M038	C4M038_ENTHI	Rho guanine nucleotide exchange factor, putative	EHI_021230	1	1	DISCRETE	971
C4M0Z5	C4M0Z5_ENTHI	Uncharacterized protein	EHI_135090	1	1	DISCRETE	981
C4M1K0	C4M1K0_ENTHI	Lecithin:cholesterol acyltransferase domain-containing protein	EHI_084690	1	1	DISCRETE	1627
C4M1L6	C4M1L6_ENTHI	Putative uncharacterized protein	EHI_085060	1	1	DISCRETE	410
C4M1U3	C4M1U3_ENTHI	Thioredoxin, putative	EHI_027550	1	1	DISCRETE	282
C4M219	C4M219_ENTHI	Putative uncharacterized protein	EHI_150380	1	1	DISCRETE	1671
C4M2I6	C4M2I6_ENTHI	Putative uncharacterized protein	EHI_054670	1	1	DISCRETE	1500
C4M3G6	C4M3G6_ENTHI	Putative uncharacterized protein	EHI_017610	1	1	DISCRETE	702
C4M3P0	C4M3P0_ENTHI	Putative uncharacterized protein	EHI_140680	1	1	DISCRETE	451
C4M4U5	C4M4U5_ENTHI	Putative uncharacterized protein	EHI_193410	1	1	DISCRETE	866
C4M546	C4M546_ENTHI	Putative uncharacterized protein	EHI_078200	1	1	DISCRETE	1431
C4M5G0	C4M5G0_ENTHI	Zinc finger domain containing protein	EHI_058540	1	1	EQUIVALENT	1099	C4M8G3
C4M5N0	C4M5N0_ENTHI	Putative uncharacterized protein	EHI_122720	1	1	DISCRETE	1714
C4M611	C4M611_ENTHI	Putative uncharacterized protein	EHI_072060	1	1	DISCRETE	1542
C4M6I6	C4M6I6_ENTHI	EF-hand calcium-binding domain containing protein	EHI_173470	1	1	DISCRETE	1148
C4M8U1	C4M8U1_ENTHI	Putative uncharacterized protein	EHI_143830	1	1	DISCRETE	1733
C4M904	C4M904_ENTHI	Putative uncharacterized protein	EHI_147870	1	1	DISCRETE	581
C4MA84	C4MA84_ENTHI	Uncharacterized protein	EHI_067260	1	1	DISCRETE	411
C4MAD2	C4MAD2_ENTHI	Putative uncharacterized protein	EHI_041070	1	1	DISCRETE	1729
C4MAR3	C4MAR3_ENTHI	Putative uncharacterized protein	EHI_070130	1	1	DISCRETE	1260
C4MBD5	C4MBD5_ENTHI	Putative uncharacterized protein	EHI_149530	1	1	DISCRETE	1077
Q1EQ05	Q1EQ05_ENTHI	EhSyntaxin 16	EHI_164320	1	1	DIFFERENTIABLE	1113
B1N4L5	B1N4L5_ENTHI	Putative uncharacterized protein	EHI_129370	1	1	DISCRETE	1382
C4LT06	C4LT06_ENTHI	Putative uncharacterized protein	EHI_148360	1	1	DISCRETE	1370
C4LTN5	C4LTN5_ENTHI	Helicase domain-containing protein	EHI_012470	1	1	DISCRETE	1576
C4M083	C4M083_ENTHI	Putative uncharacterized protein	EHI_004880	1	1	DISCRETE	1244
C4M2K0	C4M2K0_ENTHI	Putative uncharacterized protein	EHI_054810	1	1	DISCRETE	1491
C4M3N5	C4M3N5_ENTHI	Putative uncharacterized protein	EHI_140630	1	1	DISCRETE	1361
C4M588	C4M588_ENTHI	Ras family GTPase	EHI_154240	1	1	DISCRETE	1342
C4M8M0	C4M8M0_ENTHI	Rap/Ran GTPase-activating protein, putative	EHI_090440	1	1	DISCRETE	1771
C4M9J5	C4M9J5_ENTHI	Putative uncharacterized protein	EHI_107790	1	1	DISCRETE	1503
C4MBD9	C4MBD9_ENTHI	Putative uncharacterized protein	EHI_053850	1	1	DISCRETE	1502
C4MBQ3	C4MBQ3_ENTHI	Putative uncharacterized protein	EHI_053320	1	1	DISCRETE	1306
C4LTI2	C4LTI2_ENTHI	Proteasome subunit beta type	EHI_011870	1	1	DISCRETE	938
C4LVW1	C4LVW1_ENTHI	Oxidoreductase, putative	EHI_125740	1	1	DISCRETE	748
C4LW82	C4LW82_ENTHI	Actinin-like protein, putative	EHI_155290	1	1	DISCRETE	1642
C4LZJ2	C4LZJ2_ENTHI	UDP-N-acetylglucosamine transporter, putative	EHI_124580	1	1	DISCRETE	1457
C4M0T6	C4M0T6_ENTHI	MIR domain protein	EHI_100480	1	1	DISCRETE	737
C4M1T1	C4M1T1_ENTHI	Sec61 alpha subunit, putative	EHI_164500	1	1	SUPERSET	610	Q5XWC1
C4M378	C4M378_ENTHI	Putative uncharacterized protein	EHI_086230	1	1	DISCRETE	1241
B1N2P1	B1N2P1_ENTHI	Putative uncharacterized protein	EHI_182980	1	1	DIFFERENTIABLE	923
C4LUJ3	C4LUJ3_ENTHI	Putative uncharacterized protein	EHI_049950	1	1	DISCRETE	930
C4LUL1	C4LUL1_ENTHI	Ubiquitin-like protein	EHI_022980	1	1	DISCRETE	1704
C4M041	C4M041_ENTHI	Villidin, putative	EHI_021260	1	1	DISCRETE	1234
C4M2T9	C4M2T9_ENTHI	Uncharacterized protein	EHI_188720	1	1	SUPERSET	923	S0AXE4, S0AXU9, S0AY25
C4M9M6	C4M9M6_ENTHI	3-ketoacyl-CoA synthase	EHI_112870	1	1	DISCRETE	69
C4LWN1	C4LWN1_ENTHI	Dolichyl-di-phosphooligosaccharide-protein glycotransferase, putative	EHI_069430	1	1	EQUIVALENT	711	C4M4V6
C4M3Y9	C4M3Y9_ENTHI	Signal recognition particle receptor alpha subunit, putative	EHI_200840	1	1	DISCRETE	647
C4MB98	C4MB98_ENTHI	Calmodulin, putative	EHI_000130	1	1	DISCRETE	1144
C4LSB1	C4LSB1_ENTHI	Proteasome subunit alpha type	EHI_153190	1	1	DISCRETE	1147
C4M0J5	C4M0J5_ENTHI	Uncharacterized protein	EHI_024530	1	1	EQUIVALENT	1418	S0AWD7, S0AWR6
Q6AW65	Q6AW65_ENTHI	Rab family GTPase	EhRAB7D	1	1	DISCRETE	895
C4LTB2	C4LTB2_ENTHI	Eukaryotic translation initiation factor 4 gamma, putative	EHI_044930	1	1	DISCRETE	1443
C4M2D4	C4M2D4_ENTHI	LIM zinc finger domain containing protein	EHI_158150	1	1	DISCRETE	1254
C4M2S0	C4M2S0_ENTHI	Rab family GTPase	EHI_161030	1	1	EQUIVALENT	526	Q9BLE3
C4M7U5	C4M7U5_ENTHI	Putative uncharacterized protein	EHI_020330	1	1	DISCRETE	1128
C4LW27	C4LW27_ENTHI	Putative uncharacterized protein	EHI_141800	1	1	DISCRETE	1289
C4LZY7	C4LZY7_ENTHI	Putative uncharacterized protein	EHI_065710	1	1	DISCRETE	29
C4M7U2	C4M7U2_ENTHI	Ribosomal protein L15	EHI_040800	1	1	EQUIVALENT	685	S0B0W5
C4M285	C4M285_ENTHI	26S protease regulatory subunit, putative	EHI_180350	1	1	DISCRETE	275
C4M6U0	C4M6U0_ENTHI	Dolichol monophosphate mannose synthase, putative	EHI_054260	1	1	EQUIVALENT	1264	S0B0U1
C4M8C0	C4M8C0_ENTHI	Long-chain-fatty-acid--CoA ligase, putative	EHI_188590	1	1	DISCRETE	1075
C4MA07	C4MA07_ENTHI	Rab family GTPase	EHI_146510	1	1	DIFFERENTIABLE	277
C4LYQ0	C4LYQ0_ENTHI	Uncharacterized protein	EHI_004370	1	1	SUPERSET	648	Q24843, S0B1P3
C4M399	C4M399_ENTHI	Vacuolar ATP synthase subunit d, putative	EHI_106350	1	1	DISCRETE	496
C4MA96	C4MA96_ENTHI	Ras family GTPase	EHI_198330	1	1	DISCRETE	966
Q6R3G0	Q6R3G0_ENTHI	Calcium binding protein 2	EHI_010020	1	1	DIFFERENTIABLE	574
C4M855	C4M855_ENTHI	Rho family GTPase	EHI_052150	1	1	DIFFERENTIABLE	5
C4M9M2	C4M9M2_ENTHI	Putative uncharacterized protein	EHI_112830	1	1	DISCRETE	1493
C4MBQ9	C4MBQ9_ENTHI	Leucine rich repeat protein, BspA family	EHI_015120	1	1	SUPERSET	59	S0AX85, S0B2D4
C4LVL5	C4LVL5_ENTHI	Threonyl-tRNA synthetase, putative	EHI_103730	1	1	DISCRETE	386
C4LXT6	C4LXT6_ENTHI	Phosphoribulokinase /uridine kinase family protein	EHI_087540	1	1	DISCRETE	512
C4M0Y3	C4M0Y3_ENTHI	S-phase kinase-associated protein 1A, putative	EHI_134960	1	1	DISCRETE	844
C4M8R8	C4M8R8_ENTHI	60S ribosomal protein L13, putative	EHI_181560	1	1	SUPERSET	403
C4M4F3	C4M4F3_ENTHI	Proteasome beta subunit, putative	EHI_078710	1	1	DISCRETE	1295
C4M569	C4M569_ENTHI	60S ribosomal protein L26, putative	EHI_111570	1	1	DIFFERENTIABLE	969
C4M658	C4M658_ENTHI	Thioredoxin, putative	EHI_042900	1	1	DISCRETE	934
Q6Y0Y5	Q6Y0Y5_ENTHI	Vacuolar protein sorting 35	Vps35-1	1	1	DISCRETE	165
C4M8Z5	C4M8Z5_ENTHI	Putative uncharacterized protein	EHI_086690	1	1	EQUIVALENT	343	S0AZA1
C4LW92	C4LW92_ENTHI	40S ribosomal protein S11, putative	EHI_155410	1	1	DIFFERENTIABLE	652
B1N4Q6	B1N4Q6_ENTHI	26S protease regulatory subunit 7, putative	EHI_080890	1	1	EQUIVALENT	382	S0AX32
C4LTL7	C4LTL7_ENTHI	Rho family GTPase	EHI_012240	1	1	SUPERSET	89
C4M8D7	C4M8D7_ENTHI	26S protease regulatory subunit, putative	EHI_185410	1	1	SUPERSET	382
C4LX92	C4LX92_ENTHI	Rho family GTPase	EHI_013260	1	1	DIFFERENTIABLE	89
C4M2E4	C4M2E4_ENTHI	T-complex protein 1 gamma subunit, putative	EHI_158250	1	1	DISCRETE	201
C4M3R0	C4M3R0_ENTHI	Rho family GTPase	EHI_146180	1	1	DISCRETE	109
Q5FZP2	Q5FZP2_ENTHI	p21-activated kinase	EHI_148280	1	1	DIFFERENTIABLE	464
Q8WR14	Q8WR14_ENTHI	Hydroxylamine reductase, putative	HCP	1	1	DISCRETE	599
C4LV69	C4LV69_ENTHI	60S ribosomal protein L21, putative	EHI_161180	1	1	EQUIVALENT	920	C4LWK0, P38653
Q1EQ27	Q1EQ27_ENTHI	Beta subunit isoform a	EHI_023600	1	1	DISCRETE	497
B1N355	B1N355_ENTHI	AP-2 complex subunit mu, putative	EHI_124560	1	1	EQUIVALENT	571	Q1EQ16, S0AX88
B1N4F4	B1N4F4_ENTHI	Elongation factor 1 beta, putative	EHI_183460	1	1	DIFFERENTIABLE	729
C4M3R5	C4M3R5_ENTHI	Dynamin-like protein	EHI_052740	1	1	DISCRETE	796
C4LZW8	C4LZW8_ENTHI	26S protease regulatory subunit, putative	EHI_194570	1	1	DIFFERENTIABLE	382
C4LVV2	C4LVV2_ENTHI	PIWI, putative	EHI_125650	1	1	DISCRETE	147
C4LZP6	C4LZP6_ENTHI	40S ribosomal protein S16, putative	EHI_038620	1	1	DIFFERENTIABLE	43
Q86R89	Q86R89_ENTHI	NifU		1	1	EQUIVALENT	92	Q8MU40
B1N316	B1N316_ENTHI	40S ribosomal protein S16, putative	EHI_131190	1	1	EQUIVALENT	43	C4M2R7
C4LVI7	C4LVI7_ENTHI	Cortexillin II, putative	EHI_103430	1	1	DISCRETE	612
C4LXZ0	C4LXZ0_ENTHI	60S ribosomal protein L18a	EHI_090020	1	1	DISCRETE	267
B1N2I7	B1N2I7_ENTHI	60S ribosomal protein L10a, putative	EHI_135790	1	1	DIFFERENTIABLE	700
C4LUJ0	C4LUJ0_ENTHI	Beta-tubulin, putative	EHI_049920	1	1	DIFFERENTIABLE	180
C4M943	C4M943_ENTHI	Coronin	EHI_083590	1	1	DIFFERENTIABLE	642
C4LZM7	C4LZM7_ENTHI	Peptidase, putative	EHI_175020	1	1	DIFFERENTIABLE	712
C4LX42	C4LX42_ENTHI	TolA protein, putative	EHI_159620	1	1	DIFFERENTIABLE	343
C4LYN2	C4LYN2_ENTHI	Fibrillarin, putative	EHI_118840	1	1	EQUIVALENT	632	S0AY23
C4M2N0	C4M2N0_ENTHI	Tubulin alpha chain, putative	EHI_005950	1	1	EQUIVALENT	488	P31017
C4MAR5	C4MAR5_ENTHI	RAD23 protein, putative	EHI_001400	1	1	DIFFERENTIABLE	262
C4LSS0	C4LSS0_ENTHI	Arginase, putative	EHI_152330	1	1	DISCRETE	345
C4LY07	C4LY07_ENTHI	Ras GTPase activating protein, putative	EHI_035800	1	1	DISCRETE	832
C4LYU0	C4LYU0_ENTHI	Tubulin alpha chain, putative	EHI_010530	1	1	EQUIVALENT	488	S0AX28
C4LZ42	C4LZ42_ENTHI	40S ribosomal protein S18, putative	EHI_009680	1	1	SUPERSET	218
C4LWW4	C4LWW4_ENTHI	Methionine aminopeptidase 2	EHI_126880	1	1	DISCRETE	650
C4M3Z6	C4M3Z6_ENTHI	Phosphoglucomutase/phosphomannomutase family protein	EHI_185280	1	1	DISCRETE	39
C4M030	C4M030_ENTHI	Rubrerythrin, putative	EHI_134810	1	1	DISCRETE	498
C4LU42	C4LU42_ENTHI	Putative uncharacterized protein	EHI_068510	1	1	DISCRETE	6

## Sheet: Cysts Proteins
Protein Name	Entry name	Protein name	Gene name	Peptides Cysts	Peptides-Hits Cysts	Parsimony Type	Cluster	Equiv. Proteins
S0AXB5	S0AXB5_ENTHI	Actin, putative		11	70	DIFFERENTIABLE	123
S0AVQ9	S0AVQ9_ENTHI	Actin, putative		10	68	DIFFERENTIABLE	123
Q9TYD6	Q9TYD6_ENTHI	Actin		10	68	DIFFERENTIABLE	123
S0AWA2	S0AWA2_ENTHI	Actin, putative		10	68	DIFFERENTIABLE	123
S0AV75	S0AV75_ENTHI	Actin, putative		10	68	DIFFERENTIABLE	123
S0AUT4	S0AUT4_ENTHI	Actin, putative		10	68	DIFFERENTIABLE	123
S0AWJ9	S0AWJ9_ENTHI	Actin, putative		10	68	DIFFERENTIABLE	123
S0AWF4	S0AWF4_ENTHI	Actin		10	68	DIFFERENTIABLE	123
S0AWZ1	S0AWZ1_ENTHI	Actin		10	68	DIFFERENTIABLE	123
S0AWJ4	S0AWJ4_ENTHI	Actin, putative		10	68	DIFFERENTIABLE	123
S0AUW6	S0AUW6_ENTHI	Actin		10	68	DIFFERENTIABLE	123
B1N621	B1N621_ENTHI	Actin, putative	EHI_043640	9	66	DIFFERENTIABLE	123
S0AVA7	S0AVA7_ENTHI	Actin, putative		9	66	DIFFERENTIABLE	123
S0AUR6	S0AUR6_ENTHI	Actin, putative		9	64	DIFFERENTIABLE	123
S0AUS7	S0AUS7_ENTHI	Actin, putative		9	64	DIFFERENTIABLE	123
S0AWT4	S0AWT4_ENTHI	Actin, putative		8	63	DIFFERENTIABLE	123
S0AV23	S0AV23_ENTHI	Actin, putative		8	51	DIFFERENTIABLE	123
S0AVT2	S0AVT2_ENTHI	Actin, putative		7	50	DIFFERENTIABLE	123
S0AV15	S0AV15_ENTHI	Actin, putative		8	38	DIFFERENTIABLE	123
S0AW09	S0AW09_ENTHI	Actin, putative		8	35	DIFFERENTIABLE	123
C4M4Q8	C4M4Q8_ENTHI	Nuclear transcription factor, putative	EHI_168220	1	29	DISCRETE	1246
C4M6B9	C4M6B9_ENTHI	Putative uncharacterized protein	EHI_099260	1	23	DISCRETE	1730
S0AYM0	S0AYM0_ENTHI	Actin, putative		3	19	DIFFERENTIABLE	123
B1N624	B1N624_ENTHI	Aminoglycoside 3'-phosphotransferase , putative	EHI_117050	4	16	DISCRETE	531
C4M8Z0	C4M8Z0_ENTHI	Alkyl sulfatase, putative	EHI_086530	1	15	DISCRETE	1120
S0B1Y3	S0B1Y3_ENTHI	Actin		2	15	DIFFERENTIABLE	123
S0B0T0	S0B0T0_ENTHI	Actin, putative		2	15	DIFFERENTIABLE	123
C4MBE9	C4MBE9_ENTHI	Putative uncharacterized protein	EHI_137370	2	12	DISCRETE	1021
C4M1F3	C4M1F3_ENTHI	Putative uncharacterized protein	EHI_030850	1	11	DISCRETE	1584
C4M977	C4M977_ENTHI	Putative uncharacterized protein	EHI_124830	1	11	DISCRETE	149
C4LW71	C4LW71_ENTHI	DNA mismatch repair protein PMS1, putative	EHI_155170	1	7	DISCRETE	1658
C4LX70	C4LX70_ENTHI	Putative uncharacterized protein	EHI_012990	1	5	DISCRETE	1387
C4M4W5	C4M4W5_ENTHI	Putative uncharacterized protein	EHI_029030	1	5	DISCRETE	876
S0B1X1	S0B1X1_ENTHI	Uncharacterized protein		1	5	DIFFERENTIABLE	260
B1N486	B1N486_ENTHI	Heat shock protein 70, putative	EHI_188610	2	5	SUPERSET	17	C4LZ45, C4M1G4, C4M9V9
C4M3S5	C4M3S5_ENTHI	Heat shock protein 70, putative	EHI_052860	2	5	DIFFERENTIABLE	17
G5EKL5	G5EKL5_ENTHI	Malic enzyme	ME	2	5	DIFFERENTIABLE	30
S0AW44	S0AW44_ENTHI	Malic enzyme, putative		2	5	DIFFERENTIABLE	30
B1N2J0	B1N2J0_ENTHI	Malic enzyme, putative	EHI_050330	2	5	DIFFERENTIABLE	30
C4LYB9	C4LYB9_ENTHI	Putative uncharacterized protein	EHI_007470	1	4	DISCRETE	1462
C4M2G7	C4M2G7_ENTHI	Putative uncharacterized protein	EHI_040380	1	4	DISCRETE	1514
C4LSZ7	C4LSZ7_ENTHI	GTP-binding protein, putative	EHI_148270	2	4	DISCRETE	585
C4MBE2	C4MBE2_ENTHI	EF-hand calcium-binding domain containing protein	EHI_060740	1	4	SUPERSET	699	Q9GSV7
C4M0F4	C4M0F4_ENTHI	14-3-3 protein 3	EHI_006810	1	4	DIFFERENTIABLE	96
B1N5A8	B1N5A8_ENTHI	Peroxiredoxin	EHI_123390	1	4	SUPERSET	280
C4M3Q0	C4M3Q0_ENTHI	Peroxiredoxin	EHI_145840	1	4	DIFFERENTIABLE	280
Q24801	Q24801_ENTHI	Pyruvate phosphate dikinase	EHI_009530	2	4	DIFFERENTIABLE	127
B1N3D1	B1N3D1_ENTHI	Tyrosine-protein kinase 2, putative	EHI_062810	1	3	EQUIVALENT	1727	B1N4T5, C4LUZ4, C4LXM6, C4M4X4
B9U2P3	B9U2P3_ENTHI	Organellar DNA polymerase 1	odp1	2	3	DISCRETE	714
C4LV85	C4LV85_ENTHI	Centromeric protein E, putative	EHI_183120	2	3	DIFFERENTIABLE	505
C4LVQ7	C4LVQ7_ENTHI	Putative uncharacterized protein	EHI_186900	1	3	EQUIVALENT	1263	C4M338, S0AW41
C4LWL7	C4LWL7_ENTHI	Protein kinase, putative	EHI_069290	1	3	DISCRETE	184
C4LXX4	C4LXX4_ENTHI	Putative uncharacterized protein	EHI_035430	2	3	DISCRETE	91
C4LY17	C4LY17_ENTHI	Uncharacterized protein	EHI_177640	1	3	EQUIVALENT	1182	S0AXT7
C4LYT7	C4LYT7_ENTHI	WD domain containing protein	EHI_010500	3	3	DISCRETE	1124
C4LYU7	C4LYU7_ENTHI	BAR/SH3 domain containing protein	EHI_010600	2	3	DISCRETE	957
C4LYW1	C4LYW1_ENTHI	Putative uncharacterized protein	EHI_010740	1	3	DISCRETE	1369
C4M017	C4M017_ENTHI	Leucine-rich repeat containing protein	EHI_134680	1	3	DISCRETE	1076
C4M0W6	C4M0W6_ENTHI	UDP-glucose:glycoprotein glucosyltransferase, putative	EHI_015280	2	3	DISCRETE	478
C4M1W5	C4M1W5_ENTHI	Putative uncharacterized protein	EHI_027790	1	3	DISCRETE	803
C4M2H0	C4M2H0_ENTHI	Putative uncharacterized protein	EHI_040410	2	3	DISCRETE	1611
C4M518	C4M518_ENTHI	Helicase, putative	EHI_141120	1	3	DISCRETE	1235
C4M071	C4M071_ENTHI	Signal recognition particle protein SRP54, putative	EHI_004750	2	3	SUPERSET	677	O15821
C4M7I1	C4M7I1_ENTHI	CXXC-rich protein	EHI_111990	3	3	DISCRETE	781
C4LUN4	C4LUN4_ENTHI	Histone H4	EHI_023230	1	3	EQUIVALENT	943	P40287
C4M3X0	C4M3X0_ENTHI	Plasma membrane calcium-transporting ATPase, putative	EHI_016480	2	3	DIFFERENTIABLE	547
C4M7T9	C4M7T9_ENTHI	Ubiquitin-activating enzyme, putative	EHI_020270	1	3	DIFFERENTIABLE	627
O15601	O15601_ENTHI	Elongation factor 1 alpha		1	3	DIFFERENTIABLE	36
S0B0R7	S0B0R7_ENTHI	Elongation factor 1-alpha		1	3	DIFFERENTIABLE	36
C4LXD7	C4LXD7_ENTHI	Fructose-1,6-bisphosphate aldolase, putative	EHI_098570	2	3	SUPERSET	3
S0AWG4	S0AWG4_ENTHI	Elongation factor 1-alpha		1	3	DIFFERENTIABLE	36
A9UKI7	A9UKI7_ENTHI	Vacuolar protein sorting protein 35-2	VPS35-2	1	2	EQUIVALENT	1600	C4LWG4
B1N4S3	B1N4S3_ENTHI	Putative uncharacterized protein	EHI_154710	2	2	EQUIVALENT	997	C4M9P6
B1N5B0	B1N5B0_ENTHI	Protein kinase domain containing protein	EHI_106700	1	2	DISCRETE	1307
C4LSG8	C4LSG8_ENTHI	Putative uncharacterized protein	EHI_151250	2	2	DISCRETE	890
C4LSV3	C4LSV3_ENTHI	Rap/Ran GTPase-activating protein, putative	EHI_152690	1	2	EQUIVALENT	1580	C4M1F7
C4LT00	C4LT00_ENTHI	Putative uncharacterized protein	EHI_148300	1	2	DISCRETE	1565
C4LTQ3	C4LTQ3_ENTHI	Putative uncharacterized protein	EHI_050260	1	2	DISCRETE	1781
C4LTY5	C4LTY5_ENTHI	Ras guanine nucleotide exchange factor, putative	EHI_067890	1	2	DISCRETE	1226
C4LU67	C4LU67_ENTHI	Putative uncharacterized protein	EHI_110130	2	2	DISCRETE	455
C4LU71	C4LU71_ENTHI	Ubiquitin carboxyl-terminal hydrolase domain containing protein	EHI_110170	1	2	DISCRETE	1646
C4LUC5	C4LUC5_ENTHI	Putative uncharacterized protein	EHI_110780	1	2	DISCRETE	1454
C4LUM9	C4LUM9_ENTHI	Rab geranylgeranyltransferase alpha subunit, putative	EHI_023180	1	2	EQUIVALENT	1693	Q2PHE3
C4LUU4	C4LUU4_ENTHI	Putative uncharacterized protein	EHI_178800	1	2	DISCRETE	1684
C4LV56	C4LV56_ENTHI	Amino acid transporter, putative	EHI_182750	1	2	DISCRETE	914
C4LVJ7	C4LVJ7_ENTHI	DNA primase	EHI_103530	1	2	DISCRETE	1697
C4LW91	C4LW91_ENTHI	Putative uncharacterized protein	EHI_155400	1	2	DISCRETE	1488
C4LX63	C4LX63_ENTHI	Ran-binding protein, putative	EHI_159890	1	2	DISCRETE	1748
C4LYE1	C4LYE1_ENTHI	Ankyrin repeat protein, putative	EHI_008050	1	2	DISCRETE	1038
C4LYK1	C4LYK1_ENTHI	Rab GTPase activating protein, putative	EHI_094140	2	2	DISCRETE	1255
C4LYT4	C4LYT4_ENTHI	Ran binding protein, putative	EHI_010370	1	2	DISCRETE	1601
C4LZD0	C4LZD0_ENTHI	Heat shock protein 70, putative	EHI_137670	1	2	DISCRETE	1800
C4LZD9	C4LZD9_ENTHI	Leucine rich repeat / protein phosphatase 2C domain containing protein	EHI_137760	1	2	DISCRETE	1253
C4LZH2	C4LZH2_ENTHI	Putative uncharacterized protein	EHI_124340	2	2	DISCRETE	770
C4LZH5	C4LZH5_ENTHI	Putative uncharacterized protein	EHI_124390	2	2	DISCRETE	1744
C4LZS9	C4LZS9_ENTHI	Putative uncharacterized protein	EHI_039080	1	2	DISCRETE	1628
C4M090	C4M090_ENTHI	Bystin, putative	EHI_004960	1	2	EQUIVALENT	798	S0AY52
C4M1E0	C4M1E0_ENTHI	Putative uncharacterized protein	EHI_170180	2	2	DISCRETE	1191
C4M2A0	C4M2A0_ENTHI	Ser/thr protein phosphatase family protein	EHI_136200	1	2	DISCRETE	1461
C4M2S6	C4M2S6_ENTHI	Leucine-rich repeat containing protein	EHI_076850	1	2	DISCRETE	897
C4M2T0	C4M2T0_ENTHI	Putative uncharacterized protein	EHI_076890	1	2	DISCRETE	615
C4M350	C4M350_ENTHI	Putative uncharacterized protein	EHI_085950	2	2	DISCRETE	313
C4M3C6	C4M3C6_ENTHI	Helicase, putative	EHI_053080	1	2	DISCRETE	1619
C4M3K5	C4M3K5_ENTHI	Chromatin-specific transcription elongation factor, putative	EHI_109860	1	2	DISCRETE	1679
C4M3Z1	C4M3Z1_ENTHI	Protein kinase, putative	EHI_185230	1	2	DISCRETE	1612
C4M5F2	C4M5F2_ENTHI	Adaptor protein (AP) family protein	EHI_058450	2	2	EQUIVALENT	1374	Q1EQ25
C4M7L7	C4M7L7_ENTHI	Putative uncharacterized protein	EHI_200040	1	2	DISCRETE	1114
C4M7Z6	C4M7Z6_ENTHI	Protein kinase domain containing protein	EHI_167640	2	2	DISCRETE	771
C4M8M2	C4M8M2_ENTHI	ABC transporter, putative	EHI_114390	1	2	DISCRETE	548
C4M8R9	C4M8R9_ENTHI	Putative uncharacterized protein	EHI_181570	1	2	DISCRETE	408
C4M8X4	C4M8X4_ENTHI	Putative uncharacterized protein	EHI_120630	2	2	DISCRETE	1145
C4M9W2	C4M9W2_ENTHI	Kinesin, putative	EHI_113570	1	2	DISCRETE	1614
C4MAM8	C4MAM8_ENTHI	Putative uncharacterized protein	EHI_196760	1	2	DISCRETE	741
Q1EQ09	Q1EQ09_ENTHI	Syntaxin, putative	EHI_139030	1	2	DISCRETE	1487
Q9Y088	Q9Y088_ENTHI	Phospholipid-transporting P-type ATPase, putative	atpase	1	2	DISCRETE	1589
S0AVG3	S0AVG3_ENTHI	Uncharacterized protein		1	2	DISCRETE	1559
C4LSA7	C4LSA7_ENTHI	RhoGAP domain containing protein	EHI_153150	1	2	DISCRETE	793
C4LXA6	C4LXA6_ENTHI	Putative uncharacterized protein	EHI_098230	1	2	DISCRETE	666
C4M5M6	C4M5M6_ENTHI	Coronin	EHI_122800	2	2	EQUIVALENT	823	Q9XYQ0
C4M8V1	C4M8V1_ENTHI	Cysteinyl-tRNA synthetase, putative	EHI_169700	1	2	DISCRETE	826
Q9BLE8	Q9BLE8_ENTHI	Small GTPase Rab7A	EhRab7A	2	2	SUPERSET	188	Q9NHW8
C4M6S2	C4M6S2_ENTHI	60S ribosomal protein L14, putative	EHI_184470	1	2	SUPERSET	768	C4M8C9
C4LVD3	C4LVD3_ENTHI	Sulfate adenylyltransferase, putative	EHI_197160	2	2	SUPERSET	369	O76156
O77164	O77164_ENTHI	70 kDa heat shock protein Hsp70-Bip	BiP	2	2	DIFFERENTIABLE	74
C4M770	C4M770_ENTHI	70 kDa heat shock protein, putative	EHI_199590	2	2	DIFFERENTIABLE	74
C4LYJ7	C4LYJ7_ENTHI	Galactokinase, putative	EHI_094100	1	2	DISCRETE	570
O15593	O15593_ENTHI	Actin		1	2	DIFFERENTIABLE	123
S0AX11	S0AX11_ENTHI	Glyceraldehyde-3-phosphate dehydrogenase, putative		1	2	DIFFERENTIABLE	80
C4LVR9	C4LVR9_ENTHI	Glyceraldehyde-3-phosphate dehydrogenase, putative	EHI_187020	1	2	SUPERSET	80
B1N2J6	B1N2J6_ENTHI	GTP-binding protein, putative	EHI_051090	1	1	DISCRETE	959
B1N2R3	B1N2R3_ENTHI	Putative uncharacterized protein	EHI_126300	1	1	DISCRETE	1095
B1N2U8	B1N2U8_ENTHI	Putative uncharacterized protein	EHI_159590	1	1	DISCRETE	351
B1N2V3	B1N2V3_ENTHI	Putative uncharacterized protein	EHI_159840	1	1	DISCRETE	1775
B1N364	B1N364_ENTHI	Putative uncharacterized protein	EHI_194230	1	1	DISCRETE	1119
B1N3N2	B1N3N2_ENTHI	Putative uncharacterized protein	EHI_140380	1	1	EQUIVALENT	757	C4M0H7
B1N4E3	B1N4E3_ENTHI	Putative uncharacterized protein	EHI_193680	1	1	EQUIVALENT	1259	B1N531
B1N4E6	B1N4E6_ENTHI	Putative uncharacterized protein	EHI_034600	1	1	EQUIVALENT	1221	B1N547
B1N4I0	B1N4I0_ENTHI	RhoGAP domain containing protein	EHI_055340	1	1	DISCRETE	1041
B1N4I2	B1N4I2_ENTHI	Putative uncharacterized protein	EHI_055390	1	1	DISCRETE	1796
B1N4R1	B1N4R1_ENTHI	Putative uncharacterized protein	EHI_049180	1	1	DISCRETE	907
B1N4R7	B1N4R7_ENTHI	Putative uncharacterized protein	EHI_119740	1	1	EQUIVALENT	614	C4MAA3, C4MAP9
B1N5I7	B1N5I7_ENTHI	Putative uncharacterized protein	EHI_198110	1	1	DISCRETE	502
B1N5S3	B1N5S3_ENTHI	60S ribosomal protein L34, putative	EHI_131770	1	1	DISCRETE	1161
C4LSE0	C4LSE0_ENTHI	Inositol polyphosphate 5-phosphatase, putative	EHI_153490	1	1	DISCRETE	1022
C4LSE2	C4LSE2_ENTHI	Rho guanine nucleotide exchange factor, putative	EHI_153510	1	1	DISCRETE	420
C4LSG3	C4LSG3_ENTHI	DEAD/DEAH box helicase, putative	EHI_151190	1	1	DISCRETE	1281
C4LSJ6	C4LSJ6_ENTHI	Putative uncharacterized protein	EHI_151550	1	1	DISCRETE	1568
C4LSS6	C4LSS6_ENTHI	Protein kinase domain containing protein	EHI_152390	1	1	DISCRETE	1188
C4LSX7	C4LSX7_ENTHI	Importin alpha, putative	EHI_148070	1	1	DISCRETE	1223
C4LSY6	C4LSY6_ENTHI	Cullin, putative	EHI_148160	1	1	DISCRETE	150
C4LSZ0	C4LSZ0_ENTHI	Serine/threonine-protein kinase, putative	EHI_148200	1	1	DISCRETE	1347
C4LT03	C4LT03_ENTHI	Pumilio family RNA-binding protein	EHI_148330	1	1	DISCRETE	1416
C4LT57	C4LT57_ENTHI	Protein kinase, putative	EHI_148900	1	1	DISCRETE	1623
C4LT61	C4LT61_ENTHI	Putative uncharacterized protein	EHI_148940	1	1	DISCRETE	1657
C4LT64	C4LT64_ENTHI	RhoGAP domain containing protein	EHI_148980	1	1	DISCRETE	399
C4LTC1	C4LTC1_ENTHI	Uncharacterized protein	EHI_045060	1	1	DISCRETE	1044
C4LTI6	C4LTI6_ENTHI	Protein kinase, putative	EHI_011920	1	1	DISCRETE	1311
C4LTL1	C4LTL1_ENTHI	Putative uncharacterized protein	EHI_012180	1	1	DISCRETE	568
C4LTP7	C4LTP7_ENTHI	Rho guanine nucleotide exchange factor, putative	EHI_050100	1	1	DISCRETE	563
C4LTU9	C4LTU9_ENTHI	Structural maintenance of chromosomes protein	EHI_050790	1	1	DISCRETE	862
C4LTX9	C4LTX9_ENTHI	WD domain containing protein	EHI_067830	1	1	DISCRETE	1613
C4LTZ0	C4LTZ0_ENTHI	Putative uncharacterized protein	EHI_067940	1	1	DISCRETE	263
C4LU09	C4LU09_ENTHI	Tyrosine kinase, putative	EHI_068160	1	1	DISCRETE	10
C4LUD9	C4LUD9_ENTHI	LSM domain containing protein	EHI_049370	1	1	DISCRETE	1135
C4LUH8	C4LUH8_ENTHI	Bromodomain protein, putative	EHI_049790	1	1	DISCRETE	1790
C4LUM5	C4LUM5_ENTHI	Putative uncharacterized protein	EHI_023130	1	1	DISCRETE	1532
C4LUS9	C4LUS9_ENTHI	Putative uncharacterized protein	EHI_178650	1	1	DISCRETE	1650
C4LUV4	C4LUV4_ENTHI	Ras family protein	EHI_178900	1	1	DISCRETE	671
C4LUX1	C4LUX1_ENTHI	Phosphatidylinositol-4,5-bisphosphate 3-kinase catalytic subunit, putative	EHI_091940	1	1	DISCRETE	1608
C4LV61	C4LV61_ENTHI	Putative uncharacterized protein	EHI_182810	1	1	DISCRETE	848
C4LV77	C4LV77_ENTHI	Dolichyl-diphosphooligosaccharide-protein glycotransferase, putative	EHI_183010	1	1	DISCRETE	418
C4LVE7	C4LVE7_ENTHI	Phosphatidylinositol 3-and 4-kinase family	EHI_197310	1	1	DISCRETE	1363
C4LVQ2	C4LVQ2_ENTHI	PIWI domain protein	EHI_186850	1	1	DISCRETE	1233
C4LVX1	C4LVX1_ENTHI	Protein kinase domain containing protein	EHI_125850	1	1	EQUIVALENT	1310	Q8MZU5
C4LW36	C4LW36_ENTHI	Chromodomain-helicase-DNA-binding protein, putative	EHI_141900	1	1	DISCRETE	944
C4LW52	C4LW52_ENTHI	Putative uncharacterized protein	EHI_142070	1	1	DISCRETE	1419
C4LW54	C4LW54_ENTHI	RNA polymerase subunit Rpb5, putative	EHI_142090	1	1	DISCRETE	561
C4LWA4	C4LWA4_ENTHI	Chromosome partition protein, putative	EHI_155530	1	1	DISCRETE	1674
C4LWD0	C4LWD0_ENTHI	Protein kinase domain containing protein	EHI_096170	1	1	DISCRETE	573
C4LWU5	C4LWU5_ENTHI	Formate/nitrite transporter family protein, putative	EHI_198990	1	1	DISCRETE	250
C4LWX3	C4LWX3_ENTHI	Putative uncharacterized protein	EHI_126970	1	1	DISCRETE	1691
C4LWX9	C4LWX9_ENTHI	Ras guanine nucleotide exchange factor, putative	EHI_127040	1	1	DISCRETE	1162
C4LWZ4	C4LWZ4_ENTHI	Long-chain-fatty-acid--CoA ligase, putative	EHI_127210	1	1	DISCRETE	158
C4LX48	C4LX48_ENTHI	Putative uncharacterized protein	EHI_159680	1	1	DISCRETE	1210
C4LXC3	C4LXC3_ENTHI	WD domain containing protein	EHI_098410	1	1	DISCRETE	1754
C4LXK0	C4LXK0_ENTHI	HAD hydrolase, family IA, variant 3	EHI_073350	1	1	DISCRETE	350
C4LXL5	C4LXL5_ENTHI	Putative uncharacterized protein	EHI_073550	1	1	DISCRETE	1314
C4LXS4	C4LXS4_ENTHI	Putative uncharacterized protein	EHI_014400	1	1	DISCRETE	1718
C4LXS5	C4LXS5_ENTHI	Putative uncharacterized protein	EHI_087320	1	1	DISCRETE	1315
C4LXU1	C4LXU1_ENTHI	VHS domain containing protein	EHI_087590	1	1	DISCRETE	1773
C4LXW1	C4LXW1_ENTHI	RhoGAP domain containing protein	EHI_087810	1	1	DISCRETE	1446
C4LXW5	C4LXW5_ENTHI	RhoGEF domain-containing protein	EHI_087850	1	1	DISCRETE	1634
C4LY62	C4LY62_ENTHI	Ras guanine nucleotide exchange factor, putative	EHI_051430	1	1	DISCRETE	782
C4LY76	C4LY76_ENTHI	Protein with RhoGEF and ArfGAP domains	EHI_051820	1	1	DISCRETE	1553
C4LY79	C4LY79_ENTHI	Putative uncharacterized protein	EHI_051850	1	1	DISCRETE	1635
C4LYA1	C4LYA1_ENTHI	Putative uncharacterized protein	EHI_166990	1	1	DISCRETE	721
C4LYD5	C4LYD5_ENTHI	Putative uncharacterized protein	EHI_007980	1	1	DISCRETE	1285
C4LYG5	C4LYG5_ENTHI	Uncharacterized protein	EHI_093740	1	1	DIFFERENTIABLE	257
C4LYG6	C4LYG6_ENTHI	Putative uncharacterized protein	EHI_093750	1	1	DISCRETE	1605
C4LYI7	C4LYI7_ENTHI	Pre-mRNA splicing factor, putative	EHI_093960	1	1	DISCRETE	1724
C4LYU2	C4LYU2_ENTHI	Protein with DENN and LIM domains	EHI_010550	1	1	DISCRETE	911
C4LYV0	C4LYV0_ENTHI	HEAT repeat domain containing protein	EHI_010630	1	1	DISCRETE	728
C4LYW0	C4LYW0_ENTHI	Vacuolar sorting protein 26, putative	EHI_010730	1	1	DISCRETE	1700
C4LYW7	C4LYW7_ENTHI	Putative uncharacterized protein	EHI_117830	1	1	DISCRETE	1240
C4LZ28	C4LZ28_ENTHI	Alpha-1,2-mannosidase, putative	EHI_009520	1	1	DISCRETE	1157
C4LZ74	C4LZ74_ENTHI	Putative uncharacterized protein	EHI_104650	1	1	DISCRETE	1466
C4LZA3	C4LZA3_ENTHI	WD domain containing protein	EHI_000520	1	1	DISCRETE	1521
C4LZC7	C4LZC7_ENTHI	Chromodomain-helicase-DNA-binding protein, putative	EHI_000780	1	1	DISCRETE	1467
C4LZF3	C4LZF3_ENTHI	Putative uncharacterized protein	EHI_137920	1	1	DISCRETE	779
C4LZF7	C4LZF7_ENTHI	Putative uncharacterized protein	EHI_137960	1	1	DISCRETE	95
C4LZJ8	C4LZJ8_ENTHI	Putative uncharacterized protein	EHI_174500	1	1	DISCRETE	1643
C4LZR9	C4LZR9_ENTHI	Putative uncharacterized protein	EHI_038980	1	1	DISCRETE	1485
C4LZV6	C4LZV6_ENTHI	Putative uncharacterized protein	EHI_194430	1	1	DISCRETE	1525
C4LZW6	C4LZW6_ENTHI	Uncharacterized protein	EHI_194550	1	1	SUPERSET	381	S0AUT9, S0AVU3, S0AW38, S0AWL4, S0AXU6, S0AYV9
C4LZY5	C4LZY5_ENTHI	Phospholipase, patatin family protein	EHI_065690	1	1	DISCRETE	1641
C4M000	C4M000_ENTHI	Putative uncharacterized protein	EHI_065840	1	1	DISCRETE	1282
C4M008	C4M008_ENTHI	Putative uncharacterized protein	EHI_134480	1	1	DISCRETE	1026
C4M024	C4M024_ENTHI	Protein tyrosine kinase domain-containing protein	EHI_134750	1	1	DISCRETE	921
C4M044	C4M044_ENTHI	Putative uncharacterized protein	EHI_021290	1	1	DISCRETE	1192
C4M0B1	C4M0B1_ENTHI	Putative uncharacterized protein	EHI_064320	1	1	DISCRETE	264
C4M0D9	C4M0D9_ENTHI	Putative uncharacterized protein	EHI_006540	1	1	DISCRETE	1582
C4M0G4	C4M0G4_ENTHI	Putative uncharacterized protein	EHI_006910	1	1	DISCRETE	465
C4M0G5	C4M0G5_ENTHI	Papain family cysteine protease domain containing protein	EHI_006920	1	1	DISCRETE	1080
C4M0G8	C4M0G8_ENTHI	Putative uncharacterized protein	EHI_006950	1	1	DISCRETE	839
C4M0M2	C4M0M2_ENTHI	Ribose-phosphate pyrophosphokinase, putative	EHI_008460	1	1	DISCRETE	1372
C4M0N2	C4M0N2_ENTHI	Ubiquitin carboxyl-terminal hydrolase family protein	EHI_008680	1	1	DISCRETE	1028
C4M0T3	C4M0T3_ENTHI	Putative uncharacterized protein	EHI_100440	1	1	DISCRETE	1533
C4M118	C4M118_ENTHI	Protein kinase, putative	EHI_105130	1	1	DISCRETE	1585
C4M120	C4M120_ENTHI	Putative uncharacterized protein	EHI_105150	1	1	DISCRETE	1496
C4M191	C4M191_ENTHI	Uncharacterized protein	EHI_188170	1	1	EQUIVALENT	381	S0AVS7
C4M1I8	C4M1I8_ENTHI	Putative uncharacterized protein	EHI_001080	1	1	DISCRETE	1757
C4M1L2	C4M1L2_ENTHI	Putative uncharacterized protein	EHI_085020	1	1	DISCRETE	884
C4M1N5	C4M1N5_ENTHI	Cysteine protease, putative	EHI_062480	1	1	EQUIVALENT	1019	Q8I8D1
C4M1P3	C4M1P3_ENTHI	Putative uncharacterized protein	EHI_062670	1	1	DISCRETE	960
C4M1V3	C4M1V3_ENTHI	Putative uncharacterized protein	EHI_027670	1	1	DISCRETE	1668
C4M1V7	C4M1V7_ENTHI	Calcium-transporting P-type ATPase, putative	EHI_027710	1	1	DISCRETE	903
C4M1X6	C4M1X6_ENTHI	Putative uncharacterized protein	EHI_164830	1	1	DISCRETE	810
C4M1Y4	C4M1Y4_ENTHI	Serine/threonine-protein kinase, putative	EHI_164910	1	1	DISCRETE	1663
C4M224	C4M224_ENTHI	Villidin, putative	EHI_150430	1	1	DISCRETE	321
C4M275	C4M275_ENTHI	Protein tyrosine kinase domain-containing protein	EHI_180150	1	1	DISCRETE	668
C4M276	C4M276_ENTHI	FK506-binding protein, putative	EHI_180160	1	1	DISCRETE	1428
C4M283	C4M283_ENTHI	Putative uncharacterized protein	EHI_180330	1	1	DISCRETE	108
C4M284	C4M284_ENTHI	Putative uncharacterized protein	EHI_180340	1	1	DISCRETE	1701
C4M2L7	C4M2L7_ENTHI	Putative uncharacterized protein	EHI_079960	1	1	DISCRETE	565
C4M2Q4	C4M2Q4_ENTHI	Inositol polyphosphate 5-phosphatase, putative	EHI_160860	1	1	DISCRETE	1123
C4M318	C4M318_ENTHI	Putative uncharacterized protein	EHI_025310	1	1	DISCRETE	1481
C4M329	C4M329_ENTHI	Long-chain-fatty-acid--CoA ligase, putative	EHI_025420	1	1	DISCRETE	326
C4M369	C4M369_ENTHI	Ras guanine nucleotide exchange factor, putative	EHI_086140	1	1	DISCRETE	1400
C4M383	C4M383_ENTHI	Putative uncharacterized protein	EHI_106080	1	1	DISCRETE	972
C4M3C8	C4M3C8_ENTHI	Putative uncharacterized protein	EHI_053100	1	1	DISCRETE	1798
C4M3H9	C4M3H9_ENTHI	Putative uncharacterized protein	EHI_138370	1	1	DISCRETE	1448
C4M3I5	C4M3I5_ENTHI	Putative uncharacterized protein	EHI_138430	1	1	DISCRETE	750
C4M3I8	C4M3I8_ENTHI	Papain family cysteine protease domain containing protein	EHI_138460	1	1	DISCRETE	1807
C4M3J4	C4M3J4_ENTHI	Putative uncharacterized protein	EHI_138520	1	1	DISCRETE	780
C4M3K4	C4M3K4_ENTHI	Putative uncharacterized protein	EHI_109850	1	1	DISCRETE	932
C4M3K7	C4M3K7_ENTHI	Putative uncharacterized protein	EHI_109880	1	1	DISCRETE	1201
C4M3Q2	C4M3Q2_ENTHI	Putative uncharacterized protein	EHI_145970	1	1	DISCRETE	1475
C4M3Q9	C4M3Q9_ENTHI	Putative uncharacterized protein	EHI_146160	1	1	EQUIVALENT	1352	C4M5W0
C4M3U1	C4M3U1_ENTHI	Putative uncharacterized protein	EHI_163600	1	1	DISCRETE	1239
C4M3W5	C4M3W5_ENTHI	Myotubularin, putative	EHI_016430	1	1	DISCRETE	1208
C4M3W9	C4M3W9_ENTHI	Putative uncharacterized protein	EHI_016470	1	1	DISCRETE	928
C4M3Z5	C4M3Z5_ENTHI	Dedicator of cytokinesis domain containing protein	EHI_185270	1	1	DISCRETE	1292
C4M429	C4M429_ENTHI	Putative uncharacterized protein	EHI_114220	1	1	DISCRETE	899
C4M469	C4M469_ENTHI	Putative uncharacterized protein	EHI_140200	1	1	DISCRETE	1368
C4M480	C4M480_ENTHI	Protein kinase, putative	EHI_140320	1	1	DISCRETE	843
C4M4D0	C4M4D0_ENTHI	Putative uncharacterized protein	EHI_156300	1	1	DISCRETE	1677
C4M4E9	C4M4E9_ENTHI	Rho guanine nucleotide exchange factor, putative	EHI_078740	1	1	DISCRETE	755
C4M4M5	C4M4M5_ENTHI	Putative uncharacterized protein	EHI_189410	1	1	DIFFERENTIABLE	831
C4M4S0	C4M4S0_ENTHI	Putative uncharacterized protein	EHI_095070	1	1	DISCRETE	785
C4M4V1	C4M4V1_ENTHI	Haloacid dehalogenase-like hydrolase domain-containing protein	EHI_193490	1	1	DISCRETE	1717
C4M4X2	C4M4X2_ENTHI	FHA domain protein, putative	EHI_029080	1	1	DISCRETE	509
C4M551	C4M551_ENTHI	Putative uncharacterized protein	EHI_178130	1	1	DISCRETE	501
C4M555	C4M555_ENTHI	Leucine rich repeat / protein phosphatase 2C domain containing protein	EHI_178020	1	1	DISCRETE	797
C4M5D0	C4M5D0_ENTHI	Putative uncharacterized protein	EHI_121840	1	1	DISCRETE	1716
C4M5H5	C4M5H5_ENTHI	Hsp70 family protein	EHI_111080	1	1	EQUIVALENT	1799	Q8I8X7
C4M5T8	C4M5T8_ENTHI	Leucine rich repeat protein, BspA family	EHI_082060	1	1	DISCRETE	445
C4M5W3	C4M5W3_ENTHI	Putative uncharacterized protein	EHI_026430	1	1	DISCRETE	834
C4M5W5	C4M5W5_ENTHI	Putative uncharacterized protein	EHI_026450	1	1	DISCRETE	1165
C4M606	C4M606_ENTHI	Putative uncharacterized protein	EHI_072010	1	1	DISCRETE	1750
C4M610	C4M610_ENTHI	Viral A-type inclusion protein repeat, putative	EHI_072050	1	1	DISCRETE	1547
C4M612	C4M612_ENTHI	Leucine rich repeat protein, BspA family	EHI_072070	1	1	DISCRETE	1670
C4M622	C4M622_ENTHI	Diaphanous protein, putative	EHI_125300	1	1	DIFFERENTIABLE	269
C4M626	C4M626_ENTHI	DNA-directed RNA polymerase	EHI_125350	1	1	DISCRETE	1552
C4M631	C4M631_ENTHI	Putative uncharacterized protein	EHI_179800	1	1	DISCRETE	1433
C4M643	C4M643_ENTHI	Putative uncharacterized protein	EHI_179920	1	1	DISCRETE	1159
C4M650	C4M650_ENTHI	Putative uncharacterized protein	EHI_179990	1	1	DISCRETE	1073
C4M657	C4M657_ENTHI	Leucine rich repeat protein	EHI_042890	1	1	DISCRETE	1557
C4M692	C4M692_ENTHI	Cytosolic regulator pianissimo, putative	EHI_081760	1	1	DISCRETE	1405
C4M6B5	C4M6B5_ENTHI	Putative uncharacterized protein	EHI_099220	1	1	DISCRETE	1286
C4M6D8	C4M6D8_ENTHI	Putative uncharacterized protein	EHI_142910	1	1	DISCRETE	1591
C4M6F8	C4M6F8_ENTHI	Putative uncharacterized protein	EHI_099780	1	1	DISCRETE	1575
C4M6H8	C4M6H8_ENTHI	Mucin-2, putative	EHI_173410	1	1	DISCRETE	1150
C4M6I4	C4M6I4_ENTHI	Putative uncharacterized protein	EHI_173500	1	1	DISCRETE	1702
C4M6Q2	C4M6Q2_ENTHI	Putative uncharacterized protein	EHI_201230	1	1	DISCRETE	1070
C4M6Q8	C4M6Q8_ENTHI	HEAT repeat domain containing protein	EHI_201290	1	1	DISCRETE	1238
C4M6T0	C4M6T0_ENTHI	Protein kinase, putative	EHI_184540	1	1	DISCRETE	1273
C4M6T2	RTCB2_ENTHI	tRNA-splicing ligase RtcB homolog 2	EHI_184560	1	1	DISCRETE	1621
C4M6T3	C4M6T3_ENTHI	Lipase, putative	EHI_054190	1	1	DISCRETE	196
C4M6W9	C4M6W9_ENTHI	Putative uncharacterized protein	EHI_139440	1	1	DISCRETE	1734
C4M6Y0	C4M6Y0_ENTHI	Cleavage and polyadenylation specificity factor 100 kDa subunit, putative	EHI_033130	1	1	DISCRETE	1783
C4M700	C4M700_ENTHI	Protein kinase, putative	EHI_057680	1	1	DISCRETE	1640
C4M731	C4M731_ENTHI	Putative uncharacterized protein	EHI_183520	1	1	DISCRETE	1009
C4M777	C4M777_ENTHI	Structural maintenance of chromosomes protein	EHI_199700	1	1	DISCRETE	1270
C4M7A4	C4M7A4_ENTHI	Putative uncharacterized protein	EHI_046680	1	1	DISCRETE	864
C4M7D1	C4M7D1_ENTHI	Protein kinase domain containing protein	EHI_011180	1	1	DISCRETE	1615
C4M7E0	C4M7E0_ENTHI	Putative uncharacterized protein	EHI_109000	1	1	DISCRETE	1349
C4M7E4	C4M7E4_ENTHI	Putative uncharacterized protein	EHI_166370	1	1	DISCRETE	1048
C4M7I9	C4M7I9_ENTHI	WD domain containing protein	EHI_023870	1	1	DISCRETE	1550
C4M7P0	C4M7P0_ENTHI	Chaperone protein dnaK, putative	EHI_037230	1	1	DISCRETE	1602
C4M7V2	C4M7V2_ENTHI	Putative uncharacterized protein	EHI_020360	1	1	DISCRETE	1486
C4M808	C4M808_ENTHI	Putative uncharacterized protein	EHI_143620	1	1	DISCRETE	1214
C4M8H7	C4M8H7_ENTHI	Putative uncharacterized protein	EHI_120270	1	1	DISCRETE	1427
C4M8K3	C4M8K3_ENTHI	Actin, putative	EHI_197810	1	1	DISCRETE	696
C4M8P6	C4M8P6_ENTHI	Helicase, putative	EHI_053600	1	1	DISCRETE	1662
C4M8S8	C4M8S8_ENTHI	Putative uncharacterized protein	EHI_146970	1	1	DISCRETE	1660
C4M8U6	C4M8U6_ENTHI	Uncharacterized protein	EHI_169650	1	1	DISCRETE	1597
C4M8U7	C4M8U7_ENTHI	Lipid phosphate phosphatase, putative	EHI_169660	1	1	DISCRETE	1692
C4M8Y7	C4M8Y7_ENTHI	Short chain dehydrogenase family protein	EHI_086500	1	1	EQUIVALENT	543	C4MAX1
C4M928	C4M928_ENTHI	Putative uncharacterized protein	EHI_121510	1	1	DISCRETE	1151
C4M954	C4M954_ENTHI	Rap/Ran GTPase activating protein, putative	EHI_139960	1	1	DISCRETE	1384
C4M9L4	C4M9L4_ENTHI	Putative uncharacterized protein	EHI_022250	1	1	DISCRETE	1313
C4M9L5	C4M9L5_ENTHI	Putative uncharacterized protein	EHI_022260	1	1	DISCRETE	1537
C4M9P9	C4M9P9_ENTHI	Putative uncharacterized protein	EHI_095460	1	1	DISCRETE	1476
C4M9Q4	C4M9Q4_ENTHI	Putative uncharacterized protein	EHI_055410	1	1	DISCRETE	1524
C4M9T0	C4M9T0_ENTHI	Serine/threonine-protein phosphatase	EHI_056650	1	1	DISCRETE	1595
C4M9U4	C4M9U4_ENTHI	Sec1 family domain containing protein	EHI_108480	1	1	DISCRETE	1202
C4M9W4	C4M9W4_ENTHI	DNA repair/transcription protein Mms19, putative	EHI_129310	1	1	DISCRETE	746
C4MA57	C4MA57_ENTHI	Putative uncharacterized protein	EHI_061870	1	1	DISCRETE	1707
C4MA95	C4MA95_ENTHI	Heat shock protein 70, putative	EHI_198320	1	1	SUPERSET	197	Q9GYV8
C4MAG5	C4MAG5_ENTHI	Putative uncharacterized protein	EHI_154700	1	1	DISCRETE	1269
C4MAH2	C4MAH2_ENTHI	Putative uncharacterized protein	EHI_171770	1	1	DISCRETE	654
C4MAL5	C4MAL5_ENTHI	Putative uncharacterized protein	EHI_123250	1	1	DISCRETE	766
C4MAP7	C4MAP7_ENTHI	Putative uncharacterized protein	EHI_157130	1	1	DISCRETE	1354
C4MAQ1	C4MAQ1_ENTHI	Putative uncharacterized protein	EHI_172010	1	1	DISCRETE	577
C4MAV0	C4MAV0_ENTHI	Putative uncharacterized protein	EHI_020480	1	1	DISCRETE	1740
C4MAY5	C4MAY5_ENTHI	Serine/threonine-protein phosphatase	EHI_167510	1	1	DISCRETE	1806
C4MB19	C4MB19_ENTHI	Long-chain-fatty-acid--CoA ligase, putative	EHI_025090	1	1	DISCRETE	14
C4MBA2	C4MBA2_ENTHI	Putative uncharacterized protein	EHI_031640	1	1	DISCRETE	772
C4MBC2	C4MBC2_ENTHI	Putative uncharacterized protein	EHI_011060	1	1	DISCRETE	533
C4MBF3	C4MBF3_ENTHI	Putative uncharacterized protein	EHI_165790	1	1	DISCRETE	542
Q1EQ44	Q1EQ44_ENTHI	EhSec24E	EHI_035520	1	1	DISCRETE	851
Q5NT06	Q5NT06_ENTHI	Small GTPase EhRabX10	EhRabX10	1	1	DISCRETE	950
Q6RCM0	Q6RCM0_ENTHI	DNA topoisomerase 2	EHI_120640	1	1	DISCRETE	988
Q70S43	Q70S43_ENTHI	Chloride channel protein 2, putative	clcA	1	1	DISCRETE	1736
Q76IN4	Q76IN4_ENTHI	Reverse transcriptase	rt	1	1	DISCRETE	1125
B1N3W9	B1N3W9_ENTHI	Glutamine synthetase, putative	EHI_125180	1	1	DIFFERENTIABLE	1367
C4LS87	C4LS87_ENTHI	Putative uncharacterized protein	EHI_152940	1	1	DISCRETE	1395
C4LUR0	C4LUR0_ENTHI	Putative uncharacterized protein	EHI_178440	1	1	DISCRETE	1586
C4LXD1	C4LXD1_ENTHI	Putative uncharacterized protein	EHI_098510	1	1	DIFFERENTIABLE	110
C4M0B6	C4M0B6_ENTHI	Heat shock protein 70, putative	EHI_064470	1	1	DISCRETE	334
C4M0V2	C4M0V2_ENTHI	Multidrug resistance protein, putative	EHI_100320	1	1	DISCRETE	529
C4M6R5	C4M6R5_ENTHI	Ribosomal RNA methyltransferase, putative	EHI_088070	1	1	DISCRETE	440
Q1EQ34	Q1EQ34_ENTHI	Delta1-COP		1	1	DIFFERENTIABLE	119
Q9U7F6	Q9U7F6_ENTHI	Adhesin 112 (EhADH112)	adh112	1	1	DISCRETE	553
S0AVU5	S0AVU5_ENTHI	Uncharacterized protein		1	1	DIFFERENTIABLE	1088
B1N2L8	B1N2L8_ENTHI	Heat shock protein, putative	EHI_022620	1	1	EQUIVALENT	1262	B1N3R1, B1N3X2, B1N4V0, B1N523, B1N5D4, C4LXL4, C4MB78
C4LUZ3	C4LUZ3_ENTHI	Putative uncharacterized protein	EHI_092290	1	1	DISCRETE	1450
C4LW73	C4LW73_ENTHI	Ankyrin repeat protein, putative	EHI_155190	1	1	DISCRETE	850
C4LZ15	C4LZ15_ENTHI	3-ketoacyl-CoA synthase	EHI_009370	1	1	DIFFERENTIABLE	106
C4M653	C4M653_ENTHI	Histidyl-tRNA synthetase, putative	EHI_180020	1	1	DISCRETE	67
C4LZU7	C4LZU7_ENTHI	Autophagy-related protein 3	EHI_194330	1	1	DISCRETE	28
C4M2N7	C4M2N7_ENTHI	Deoxyhypusine synthase, putative	EHI_006030	1	1	DISCRETE	910
C4M3R9	C4M3R9_ENTHI	Protein kinase, putative	EHI_052800	1	1	DISCRETE	1049
C4M933	C4M933_ENTHI	PH-protein kinase domain containing protein	EHI_097620	1	1	DIFFERENTIABLE	833
C4MBF5	C4MBF5_ENTHI	Putative uncharacterized protein	EHI_161640	1	1	DISCRETE	1335
C4LXG8	C4LXG8_ENTHI	Putative uncharacterized protein	EHI_131000	1	1	DIFFERENTIABLE	560
C4LYN0	C4LYN0_ENTHI	Putative uncharacterized protein	EHI_118820	1	1	DISCRETE	47
C4MAJ3	C4MAJ3_ENTHI	Ras guanine nucleotide exchange factor, putative	EHI_143100	1	1	DISCRETE	1345
Q4QT07	Q4QT07_ENTHI	Rab GTPase		1	1	DIFFERENTIABLE	1318
C4M8B8	C4M8B8_ENTHI	Protein tyrosine kinase domain-containing protein	EHI_101280	1	1	DIFFERENTIABLE	1336
C4M3N7	C4M3N7_ENTHI	Putative transcription enhancer protein	EHI_140650	1	1	DISCRETE	705
C4LSN2	C4LSN2_ENTHI	Putative uncharacterized protein	EHI_151930	1	1	DISCRETE	1358
C4LYU3	C4LYU3_ENTHI	Acyl-CoA synthetase, putative	EHI_010560	1	1	DISCRETE	444
C4M0C2	C4M0C2_ENTHI	Type A flavoprotein, putative	EHI_064530	1	1	DIFFERENTIABLE	372
C4M3V7	C4M3V7_ENTHI	Putative uncharacterized protein	EHI_016350	1	1	DISCRETE	795
C4M5B9	C4M5B9_ENTHI	Putative uncharacterized protein	EHI_121720	1	1	DISCRETE	52
C4M717	C4M717_ENTHI	Rab family GTPase	EHI_189990	1	1	EQUIVALENT	188	Q6AW66
Q6AW64	Q6AW64_ENTHI	EhRab7E protein	EhRAB7E	1	1	DIFFERENTIABLE	188
C4M515	C4M515_ENTHI	HEAT repeat domain containing protein	EHI_141090	1	1	DISCRETE	1037
C4LSV2	C4LSV2_ENTHI	EH-domain containing protein, putative	EHI_152680	1	1	DIFFERENTIABLE	19
C4MAK5	C4MAK5_ENTHI	Eukaryotic translation initiation factor 3 subunit G	EHI_017030	1	1	DISCRETE	1115
C4M3J8	C4M3J8_ENTHI	START domain containing protein	EHI_109680	1	1	DIFFERENTIABLE	605
Q27642	Q27642_ENTHI	Putative plasma membrane calcium ion-transporting ATPase		1	1	DIFFERENTIABLE	547
C4LY23	C4LY23_ENTHI	Putative uncharacterized protein	EHI_176980	1	1	DIFFERENTIABLE	246
C4M846	C4M846_ENTHI	26s protease regulatory subunit	EHI_052050	1	1	DIFFERENTIABLE	382
C4M6A4	C4M6A4_ENTHI	Acetyl-coA carboxylase, putative	EHI_082530	1	1	DISCRETE	508
C4LXG1	C4LXG1_ENTHI	Purine nucleoside phosphorylase, putative	EHI_130930	1	1	EQUIVALENT	572	S0AZI4
C4LYS4	C4LYS4_ENTHI	Vesicle-fusing ATPase, putative	EHI_004640	1	1	DIFFERENTIABLE	70
C4LYV2	C4LYV2_ENTHI	60S ribosomal protein L7, putative	EHI_010650	1	1	SUPERSET	342	S0AYD9
C4M8Z5	C4M8Z5_ENTHI	Putative uncharacterized protein	EHI_086690	1	1	EQUIVALENT	343	S0AZA1
Q6AW60	Q6AW60_ENTHI	EhRab11A protein	EhRAB11A	1	1	DIFFERENTIABLE	299
Q24834	Q24834_ENTHI	Disulphide oxidoreductase	gEh-34 KDa protein	1	1	DIFFERENTIABLE	405
C4M9P2	C4M9P2_ENTHI	Filopodin, putative	EHI_080740	1	1	DIFFERENTIABLE	40
Q9BLE4	Q9BLE4_ENTHI	Small GTPase Rab11B	EhRab11B	1	1	DIFFERENTIABLE	299
B1N368	B1N368_ENTHI	Putative uncharacterized protein	EHI_065490	1	1	DISCRETE	118
B1N384	B1N384_ENTHI	60S ribosomal protein L4, putative	EHI_064710	1	1	SUPERSET	68	S0AYF5, S0B2U7
C4LYB3	C4LYB3_ENTHI	Filopodin, putative	EHI_167130	1	1	DISCRETE	527
C4LZ50	C4LZ50_ENTHI	Actin binding protein, putative	EHI_104390	1	1	SUPERSET	297	O76753
B1N336	B1N336_ENTHI	40S ribosomal protein S4, putative	EHI_118170	1	1	SUPERSET	500	C4LYF4, S0AVH8, S0AZM5
C4M711	C4M711_ENTHI	Putative uncharacterized protein	EHI_189930	1	1	DISCRETE	202
C4M6Y2	C4M6Y2_ENTHI	Polyadenylate-binding protein, putative	EHI_033250	1	1	EQUIVALENT	294	S0AYB2
C4LTM0	C4LTM0_ENTHI	Gal/GalNAc lectin heavy subunit	EHI_012270	1	1	DIFFERENTIABLE	24
B1N3C7	B1N3C7_ENTHI	Galactose-inhibitable lectin 170 kDa subunit, putative	EHI_133900	1	1	SUPERSET	24	P32022
Q24835	Q24835_ENTHI	Galactose-specific adhesin 170kD subunit	hgl3	1	1	DIFFERENTIABLE	24
C4MB38	C4MB38_ENTHI	Protein disulfide isomerase, putative	EHI_071590	1	1	EQUIVALENT	442	Q5XWD1
O15729	O15729_ENTHI	Peptidyl-prolyl cis-trans isomerase	CYP1	1	1	DISCRETE	308
C4LY85	C4LY85_ENTHI	Ubiquitin, putative	EHI_166800	1	1	SUPERSET	33	C4M760
S0AZU7	S0AZU7_ENTHI	Phosphoglycerate kinase		1	1	DIFFERENTIABLE	318
B1N306	B1N306_ENTHI	Elongation factor 2	EHI_166810	1	1	SUPERSET	120	C4M4N3
Q07569	Q07569_ENTHI	Myosin heavy chain	mhcA	1	1	DIFFERENTIABLE	61
C4LU72	C4LU72_ENTHI	Myosin heavy chain	EHI_110180	1	1	DIFFERENTIABLE	61
