# Supplementary material for: Proteomic Study of Entamoeba histolytica Trophozoites, Cysts, and Cyst-Like Structures
Source: PLoS One. 2016 May 26;11(5):e0156018. doi: 10.1371/journal.pone.0156018 (PMC4882050; doi:10.1371/journal.pone.0156018)
Supplement: S2 Table — (XLS) [file pone.0156018.s002.xls]

## Sheet: Functional Cat. Trophozoites
	Entamoeba histolytica (REF)	Proteins identified in our study
PANTHER GO-Slim Biological Process	#	#	Expected	Fold Enrichment	+/-	P value
generation of precursor metabolites and energy	41	21	3.97	> 5	+	1.76e-07
sulfur compound metabolic process	16	9	1.55	> 5	+	0.00432
respiratory electron transport chain	17	9	1.65	> 5	+	0.00684
tricarboxylic acid cycle	6	3	0.58	> 5	+	1
chromatin assembly	1	1	0.1	> 5	+	1
cyclic nucleotide metabolic process	1	1	0.1	> 5	+	1
asymmetric protein localization	1	1	0.1	> 5	+	1
defense response to bacterium	1	1	0.1	> 5	+	1
polyphosphate catabolic process	2	1	0.19	> 5	+	1
fatty acid biosynthetic process	2	1	0.19	> 5	+	1
RNA splicing, via transesterification reactions	48	0	4.64	< 0.2	-	1
meiosis	4	0	0.39	< 0.2	-	1
response to endogenous stimulus	2	0	0.19	< 0.2	-	1
RNA splicing	51	0	4.94	< 0.2	-	0.892
pinocytosis	1	0	0.1	< 0.2	-	1
protein methylation	8	0	0.77	< 0.2	-	1
nitric oxide biosynthetic process	1	0	0.1	< 0.2	-	1
regulation of gene expression, epigenetic	1	0	0.1	< 0.2	-	1
protein ADP-ribosylation	1	0	0.1	< 0.2	-	1
amino acid transport	14	0	1.35	< 0.2	-	1
7-methylguanosine mRNA capping	4	0	0.39	< 0.2	-	1
reproduction	5	0	0.48	< 0.2	-	1
peroxisomal transport	5	0	0.48	< 0.2	-	1
vitamin catabolic process	1	0	0.1	< 0.2	-	1
extracellular transport	1	0	0.1	< 0.2	-	1
mitochondrion organization	2	0	0.19	< 0.2	-	1
mitochondrial transport	2	0	0.19	< 0.2	-	1
response to pheromone	2	0	0.19	< 0.2	-	1
mRNA transcription	5	0	0.48	< 0.2	-	1
regulation of cellular amino acid metabolic process	1	0	0.1	< 0.2	-	1
translation	253	113	24.48	4.62	+	7.41e-39
pentose-phosphate shunt	7	3	0.68	4.43	+	1
monosaccharide metabolic process	47	19	4.55	4.18	+	3.93e-05
coenzyme metabolic process	15	6	1.45	4.13	+	0.475
cytoskeleton organization	13	5	1.26	3.97	+	1
glycolysis	13	5	1.26	3.97	+	1
fatty acid metabolic process	21	8	2.03	3.94	+	0.15
cytokinesis	31	11	3	3.67	+	0.0355
vitamin biosynthetic process	6	2	0.58	3.44	+	1
ferredoxin metabolic process	3	1	0.29	3.44	+	1
oxidative phosphorylation	3	1	0.29	3.44	+	1
gluconeogenesis	3	1	0.29	3.44	+	1
regulation of translation	76	25	7.35	3.4	+	2.74e-05
pyrimidine nucleobase metabolic process	31	10	3	3.33	+	0.135
homeostatic process	22	7	2.13	3.29	+	0.783
nucleobase-containing compound transport	20	6	1.94	3.1	+	1
protein folding	91	27	8.81	3.07	+	6.59e-05
RNA localization	17	5	1.65	3.04	+	1
cellular amino acid catabolic process	17	5	1.65	3.04	+	1
proteolysis	160	46	15.48	2.97	+	1.91e-08
cellular amino acid metabolic process	87	25	8.42	2.97	+	0.0003
lysosomal transport	14	4	1.35	2.95	+	1
cellular calcium ion homeostasis	7	2	0.68	2.95	+	1
tRNA metabolic process	55	15	5.32	2.82	+	0.0512
mRNA polyadenylation	11	3	1.06	2.82	+	1
carbohydrate metabolic process	209	55	20.22	2.72	+	7.71e-09
endocytosis	146	38	14.13	2.69	+	9.62e-06
cellular component movement	100	26	9.68	2.69	+	0.00109
phagocytosis	27	7	2.61	2.68	+	1
phosphate ion transport	4	1	0.39	2.58	+	1
protein complex assembly	77	19	7.45	2.55	+	0.0325
protein complex biogenesis	77	19	7.45	2.55	+	0.0325
protein metabolic process	1097	258	106.15	2.43	+	1.79e-41
cellular component biogenesis	193	45	18.68	2.41	+	1.4e-05
biosynthetic process	153	34	14.81	2.3	+	0.00133
receptor-mediated endocytosis	78	17	7.55	2.25	+	0.249
chromosome segregation	19	4	1.84	2.18	+	1
vesicle-mediated transport	352	72	34.06	2.11	+	4.95e-07
cation transport	54	11	5.23	2.11	+	1
protein acetylation	20	4	1.94	2.07	+	1
cellular component morphogenesis	10	2	0.97	2.07	+	1
vitamin metabolic process	10	2	0.97	2.07	+	1
anatomical structure morphogenesis	10	2	0.97	2.07	+	1
developmental process	10	2	0.97	2.07	+	1
porphyrin-containing compound metabolic process	5	1	0.48	2.07	+	1
cellular amino acid biosynthetic process	41	8	3.97	2.02	+	1
glycogen metabolic process	83	16	8.03	1.99	+	1
primary metabolic process	2001	381	193.63	1.97	+	5.41e-45
polysaccharide metabolic process	112	21	10.84	1.94	+	0.469
metabolic process	2528	471	244.63	1.93	+	1.01e-59
regulation of biological process	322	60	31.16	1.93	+	0.000212
protein glycosylation	49	9	4.74	1.9	+	1
exocytosis	88	16	8.52	1.88	+	1
cellular component organization or biogenesis	492	89	47.61	1.87	+	2.15e-06
transport	629	113	60.87	1.86	+	2.82e-08
intracellular protein transport	394	71	38.13	1.86	+	7.65e-05
localization	643	115	62.22	1.85	+	2.46e-08
regulation of phosphate metabolic process	17	3	1.65	1.82	+	1
protein transport	427	74	41.32	1.79	+	0.00018
purine nucleobase metabolic process	35	6	3.39	1.77	+	1
cellular component organization	364	62	35.22	1.76	+	0.00221
protein lipidation	18	3	1.74	1.72	+	1
organelle organization	163	27	15.77	1.71	+	0.727
cellular process	1489	240	144.09	1.67	+	1.29e-14
rRNA metabolic process	106	17	10.26	1.66	+	1
ion transport	76	12	7.35	1.63	+	1
mRNA 3'-end processing	19	3	1.84	1.63	+	1
lipid metabolic process	156	23	15.1	1.52	+	1
lipid transport	34	5	3.29	1.52	+	1
biological regulation	672	97	65.03	1.49	+	0.00772
mitosis	155	22	15	1.47	+	1
nitrogen compound metabolic process	293	41	28.35	1.45	+	1
steroid metabolic process	22	3	2.13	1.41	+	1
nuclear transport	45	6	4.35	1.38	+	1
regulation of carbohydrate metabolic process	45	6	4.35	1.38	+	1
nucleobase-containing compound metabolic process	802	106	77.61	1.37	+	0.0883
cholesterol metabolic process	16	2	1.55	1.29	+	1
response to toxic substance	8	1	0.77	1.29	+	1
response to stimulus	404	50	39.09	1.28	+	1
RNA metabolic process	480	57	46.45	1.23	+	1
cell communication	491	56	47.51	1.18	+	1
regulation of molecular function	352	40	34.06	1.17	+	1
regulation of catalytic activity	352	40	34.06	1.17	+	1
cellular protein modification process	569	64	55.06	1.16	+	1
response to stress	325	36	31.45	1.14	+	1
catabolic process	148	16	14.32	1.12	+	1
transcription from RNA polymerase II promoter	198	21	19.16	1.1	+	1
regulation of nucleobase-containing compound metabolic process	161	17	15.58	1.09	+	1
transcription, DNA-dependent	218	22	21.1	1.04	+	1
chromatin organization	62	6	6	1	+	1
protein localization	65	6	6.29	0.95	-	1
response to external stimulus	22	2	2.13	0.94	-	1
cell cycle	490	44	47.42	0.93	-	1
protein phosphorylation	369	31	35.71	0.87	-	1
mRNA processing	160	13	15.48	0.84	-	1
regulation of transcription from RNA polymerase II promoter	87	7	8.42	0.83	-	1
phosphate-containing compound metabolic process	381	30	36.87	0.81	-	1
phospholipid metabolic process	71	5	6.87	0.73	-	1
protein targeting	72	5	6.97	0.72	-	1
carbohydrate transport	15	1	1.45	0.69	-	1
cellular defense response	16	1	1.55	0.65	-	1
regulation of cell cycle	17	1	1.65	0.61	-	1
DNA metabolic process	164	9	15.87	0.57	-	1
DNA replication	72	4	6.97	0.57	-	1
Unclassified	5209	266	504.06	0.53	-	0
DNA repair	83	4	8.03	0.5	-	1
mRNA splicing, via spliceosome	67	3	6.48	0.46	-	1
anion transport	26	1	2.52	0.4	-	1
DNA recombination	29	1	2.81	0.36	-	1
RNA catabolic process	29	1	2.81	0.36	-	1

## Sheet: Enrichment Trophozites <0.05
	Entamoeba histolytica (REF)	Proteins identified in our study
PANTHER GO-Slim Biological Process	#	#	Expected	Fold Enrichment	+/-	P value
sulfur compound metabolic process	16	9	1.55	> 5	+	0.00432
respiratory electron transport chain	17	9	1.65	> 5	+	0.00684
generation of precursor metabolites and energy	41	23	3.97	> 5	+	1.76e-07
translation	253	154	24.48	4.62	+	7.41e-39
monosaccharide metabolic process	47	21	4.55	4.18	+	3.93e-05
cytokinesis	31	11	3	3.67	+	0.0355
regulation of translation	76	26	7.35	3.4	+	2.74e-05
protein folding	91	27	8.81	3.07	+	6.59e-05
proteolysis	160	46	15.48	2.97	+	1.91e-08
cellular amino acid metabolic process	87	25	8.42	2.97	+	0.0003
carbohydrate metabolic process	209	57	20.22	2.72	+	7.71e-09
endocytosis	146	39	14.13	2.69	+	9.62e-06
cellular component movement	100	28	9.68	2.69	+	0.00109
protein complex assembly	77	19	7.45	2.55	+	0.0325
protein complex biogenesis	77	19	7.45	2.55	+	0.0325
protein metabolic process	1097	302	106.15	2.43	+	1.79e-41
cellular component biogenesis	193	49	18.68	2.41	+	1.4e-05
biosynthetic process	153	39	14.81	2.3	+	0.00133
vesicle-mediated transport	352	75	34.06	2.11	+	4.95e-07
primary metabolic process	2001	429	193.63	1.97	+	5.41e-45
regulation of biological process	322	61	31.16	1.93	+	0.000212
metabolic process	2528	500	244.63	1.93	+	1.01e-59
cellular component organization or biogenesis	492	95	47.61	1.87	+	2.15e-06
intracellular protein transport	394	74	38.13	1.86	+	7.65e-05
transport	629	117	60.87	1.86	+	2.82e-08
localization	643	119	62.22	1.85	+	2.46e-08
protein transport	427	77	41.32	1.79	+	0.00018
cellular component organization	364	66	35.22	1.76	+	0.00221
cellular process	1489	252	144.09	1.67	+	1.29e-14
biological regulation	672	98	65.03	1.49	+	0.00772
Unclassified	5209	266	504.06	0.53	-	0

## Sheet: Proteins ID´s Trophozoites
Sulfur compound metabolic process	Respiratory electron transport chain	Generation of precursor metabolites and energy	Translation	Monosaccharide metabolic process	Cytokinesis	Regulation of translation	Protein folding	Proteolysis	Cellular amino acid metabolic process	Carbohydrate metabolic process	Endocytosis	Cellular component movement	Protein complex assembly	Protein complex biogenesis	Protein metabolic process	Cellular component biogenesis	Biosynthetic process	Vesicle-mediated transport	Primary metabolic process	Regulation of biological process	Metabolic process	Cellular component organization or biogenesis	Intracellular protein transport	Transport	Localization	Protein transport	Cellular component organization	Cellular process	Biological regulation
Accesion protein Uniprot	Accesion protein Uniprot	Accesion protein Uniprot	Accesion protein Uniprot	Accesion protein Uniprot	Accesion protein Uniprot	Accesion protein Uniprot	Accesion protein Uniprot	Accesion protein Uniprot	Accesion protein Uniprot	Accesion protein Uniprot	Accesion protein Uniprot	Accesion protein Uniprot	Accesion protein Uniprot	Accesion protein Uniprot	Accesion protein Uniprot	Accesion protein Uniprot	Accesion protein Uniprot	Accesion protein Uniprot	Accesion protein Uniprot	Accesion protein Uniprot	Accesion protein Uniprot	Accesion protein Uniprot	Accesion protein Uniprot	Accesion protein Uniprot	Accesion protein Uniprot	Accesion protein Uniprot	Accesion protein Uniprot	Accesion protein Uniprot	Accesion protein Uniprot
C4M658	Q24802	B1N3S0	C4M660	C4LYJ7	C4LWT9	C4MAU7	C4M419	B1N2W4	C4LSS0	C4LXD7	C4LWT9	C4M2N0	C4M096	C4M096	C4M550	C4M096	C4M5A0	C4LXL1	C4LTU6	C4M096	C4LTU6	C4M096	C4LXL1	C4LXL1	C4LXL1	C4LXL1	C4M096	C4LXL1	C4M096
C4LUW9	B1N4I3	Q24802	C4M7X2	C4M6Z7	C4LSK4	C4LYI1	C4M2E4	C4M298	C4M4H1	B1N5B7	B1N5I9	C4M1X2	C4M419	C4M419	B1N420	C4M419	C4LUI9	C4LWT9	C4M6X1	C4MAU7	C4LXL1	C4M6X1	C4LWT9	C4LWT9	C4LWT9	C4LWT9	C4M6X1	C4M096	B1N2W4
C4M4T9	B1N5A6	B1N4I3	C4LZS2	Q5MAR2	C4LZS8	B1N373	C4M2C4	C4LWG9	C4MAS9	C4M6U0	C4M5T0	B1N2S4	C4M2E4	C4M2E4	C4MAU7	C4M8E1	C4LSN2	B1N5I9	B1N2F9	C4LYI1	C4M6X1	C4LWT9	B1N5I9	B1N5I9	B1N5I9	B1N5I9	C4LWT9	C4M0F4	C4M6X1
C4M1Q5	Q4VSM4	C4M6Z7	C4LYV2	C4MB22	C4LUC7	C4LSM2	C4M296	C4M550	C4LUI9	C4LWS2	C4M8B0	C4LWJ6	C4MAN6	C4MAN6	B1N5B7	C4M059	C4LZ47	C4M5T0	C4LXD7	C4M6M6	C4LZX4	C4M419	C4M5T0	C4M5T0	C4M5T0	C4M5T0	C4M2N0	C4M6X1	C4LZX4
C4LU18	C4LTX6	B1N5A6	C4LV24	C4LVR9	C4LXI9	B1N306	C4M8V6	C4M846	C4LYU3	C4LYJ7	C4LYX0	C4M2D4	C4M5K9	C4M5K9	C4M2Y3	C4M5A0	C4M2K7	C4M5L6	C4M8E1	B1N373	B1N378	C4M8E1	C4M5L6	C4M5L6	C4M5L6	C4M5L6	C4M5A0	C4LWT9	C4MAU7
Q769I7	C4LW95	C4LVR9	C4M3F3	C4M8I8	C4M5I6	C4LVN8	C4LU87	C4M4H1	C4LX00	C4M6M6	C4M081	C4LYX0	B1N510	B1N510	C4M942	C4M2E4	C4M0Z2	B1N3T5	C4M550	C4M2N9	B1N2F9	C4M2N0	C4M2N0	C4M2N0	C4M2N0	C4M2N0	Q7Z0T4	C4LSK4	C4M1X2
O15635	C4M6H3	Q86S08	B1N420	C4LVR9	C4LU72	B1N4F4	C4MAK2	C4M451	C4M2K7	C4M6Z7	C4M5Z7	C4M1G6	C4M8K8	C4M8K8	C4LYI1	C4M0C6	C4M5A0	C4M1Y2	B1N420	C4LSM2	C4M550	C4M059	B1N3T5	Q24802	Q24802	B1N3T5	C4M0C6	C4M8E1	C4M2M6
C4LYR0	C4LVW1	Q4VSM4	C4MAU7	C4LXH0	C4LZ58	C4M0E0	C4M5K9	C4M8F6	C4M8C7	C4M2N9	C4LZS8	B1N2Q5	C4M0B6	C4M0B6	C4M6M6	C4MAN6	C4M609	C4M8B0	C4MAU7	C4LXY5	B1N420	C4M5A0	C4M1Y2	C4M059	C4M059	C4M1Y2	C4M4E1	C4M8B8	C4LYI1
C4M3A8	C4M397	C4LTX6	B1N2I3	C4M0G3	C4M0P2	C4M6A9	B1N510	C4LZ01	C4LXC0	Q5MAR2	C4LX92	C4LUC7	B1N486	B1N486	C4M451	C4M0Z2	C4LT02	Q7Z0T4	B1N5B7	B1N306	C4MAU7	Q7Z0T4	C4M8B0	B1N3T5	B1N3T5	C4M8B0	C4M9P2	B1N5I9	C4M6M6
		C4LVR9	B1N4V3	C4LVS1	B1N621	C4M9V7	C4M8K8	C4LX00	C4LZ12	C4M746	C4LXI9	C4M6N7	C4LW96	C4LW96	B1N3F8	C4LV75	C4M483	C4LYX0	C4M2Y3	C4M299	C4M5T0	C4M2E4	C4LYX0	C4M1Y2	C4M1Y2	C4LYX0	C4LVQ1	C4M5T0	C4M1Y2
		C4LW95	B1N3R9	Q27647	C4M2X6	C4LX06	C4M067	C4LY85	C4M8V1	C4M5C6	C4M0Y0	Q6SCK6	B1N2H1	B1N2H1	C4M7G3	C4M5A0	C4LZ12	Q53UB0	Q24802	C4LSN4	B1N5B7	C4M0C6	C4M5Z7	C4M7C6	C4M7C6	Q53UB0	C4LSN4	C4M2Y3	B1N373
		C4LVS1	C4M5B7	C4LVR9		B1N459	C4MB38	C4LWW4	C4M5D7	C4M299	C4M5I6	C4LYP1	C4LVG4	C4LVG4	C4M8F6	C4LZB0	C4M7U0	C4M5Z7	C4LWS2	C4LVN8	C4M2Y3	C4M4E1	C4M081	C4M8B0	C4M8B0	C4M5Z7	C4LZS8	C4M2N0	C4M2N9
		C4M6H3	C4LYI1	Q27648		C4M2F7	C4M0B6	C4M2M2	C4LWX7	C4MB22	C4LTL7	C4LZ08	C4LVW6	C4LVW6	C4M2N9	C4LZN4	C4LT02	C4M081	C4M942	B1N4F4	Q24802	C4M9P2	B1N309	C4M5A0	C4M5A0	C4M081	C4M0Z2	C4M059	C4LSM2
		Q27647	B1N3F8	C4M192		C4LXH0	C4LUP1	C4M7M4	C4LY19	C4LUP7	C4LWB9	C4LU44	C4LYJ9	C4LYJ9	C4M3F3	C4M5K9	C4M0A4	B1N309	C4LYI1	Q5FZP2	C4LWS2	C4MAN6	C4LZS8	Q7Z0T4	Q7Z0T4	B1N309	C4LYB3	C4M1X2	C4LXY5
		C4LVR9	C4LZT0	C4M818		C4MAK5	B1N486	C4M3C0	C4M6H3	C4LVR9	C4M0P2	C4LVH1	C4LVH2	C4LVH2	C4LZ01	B1N510	C4M8V1	C4LSN4	C4M6M6	C4LXC1	C4M1X2	C4LVQ1	C4M079	C4LYX0	C4LYX0	C4LZS8	C4LUC7	C4M942	C4LYX0
		B1N2J0	B1N373	C4M6A4		C4LSD9	C4LW96	C4MAZ9	Q86D27	Q86S08	C4M3R5	C4MB98	C4M770	C4M770	B1N3R9	C4LSH8	C4LWX7	C4LZS8	C4M451	C4MA51	C4M2M6	C4LSN4	C4LYS4	Q53UB0	Q53UB0	C4M079	C4LV75	C4M6M6	B1N309
		Q27648	C4LSM2	C4LZK9		C4M666	C4LVB2	C4LU03	B1N2J0	C4M882	Q24806	C4LUJ0	C4LTB5	C4LTB5	C4LY85	C4M5N2	C4LY19	C4M079	C4MAS9	C4M0E0	C4M942	C4LZS8	C4M5Y9	C4M5Z7	C4M5Z7	C4LYS4	C4M5A0	B1N2S4	B1N306
		C4M192	C4M3F3	C4M632		C4LUW3	B1N2H1	Q95030	C4M220	C4M8I8	C4M717	C4LWF5	C4M3S5	C4M3S5	C4LX00	C4M8K8	C4M666	C4LYS4	B1N3F8	C4MB90	C4M6M6	C4M0Z2	C4LUC7	C4M081	C4M081	C4M5Y9	C4M6N7	C4M451	C4M299
		C4LVW1	B1N3R9	C4MAP6		C4LSV8	B1N302	C4M2I4	C4M818	C4LVR9	B1N354	C4LU72	C4M5P4	C4M5P4	C4M2E4	C4LZQ8	C4LUW3	C4LUC7	C4M7G3	C4M6A9	C4LYI1	C4LYB3	Q1EPX9	B1N309	B1N309	C4LUC7	Q1EPZ6	B1N3T5	C4LSN4
		C4M397	C4LU56	C4LU66		C4LSK1	C4LW75	C4LVM7	C4LU18	C4M6R1	B1N5I9	B1N3B2			C4M296	C4MAW3	C4M466	Q1EPX9	C4LUI9	C4M878	C4M9W7	C4LUC7	C4MBJ7	C4M4W9	C4M4W9	Q1EPX9	C4LZN4	C4M1Y2	C4LVN8
		C4LU66	B1N2Z3	C4LZC2		C4M7M0	C4M5V0	B1N5G3	Q769I7	C4LXH0	Q6AW65	C4LSV0			B1N2Z3	C4M0B6	C4LTQ5	C4M8U8	C4M8F6	C4M9V6	C4M451	C4LV75	C4M8U8	C4LSN4	C4LSN4	C4MBJ7	C4M878	C4M8B0	B1N4F4
		C4LSV1	B1N2I7			C4LYP7	C4LVW6	C4LYT1	O15635	C4M013	C4M9T7	C4LVS8			B1N2I7	B1N486	C4M0Q2	C4LX92	C4M2N9	C4LTW8	C4MAS9	C4M5A0	C4LX92	C4LZS8	C4LZS8	C4M8U8	C4M9V6	C4M5A0	Q5FZP2
		C4LZC2	C4LZG9			B1N4F4	C4LVH2	C4M307	B1N2N4	C4LVY0	Q1EQ31	C4LSV0			C4LZG9	C4LW96	B1N3K9	Q1EPZ6	C4LYU3	C4M3R9	C4M1Y2	C4M6N7	Q1EPZ6	C4M079	C4M079	C4LX92	C4LYX6	C4LUI9	C4LXC1
			C4M727			C4LU38	C4M3S9	C4LV53	C4M431	C4M7C8	Q6AW62	C4LUK9			C4M727	B1N2H1	C4LWW3	C4M3P4	C4M3F3	C4M9V7	C4M7C6	Q1EPZ6	C4M3P4	C4LYS4	C4LYS4	Q1EPZ6	C4LXI9	C4LWJ6	C4LUC7
			C4LT81			C4M2Q1	C4M770	C4LVK0	C4M8M9	C4LWV7	C4M3R0	B1N2Q5			C4LT81	C4LVG4	C4M5V7	Q1EQ46	Q5MAR2	C4LX06	B1N3F8	C4LZB0	Q1EQ46	C4M5Y9	C4M5Y9	C4M3P4	C4LZL6	C4M2N9	C4MA51
			B1N306			C4M1Z3	C4M3S5	C4M0L4		C4LUM3	C4LSV2	C4LYU0			B1N306	C4M0Q2	C4LZ42	C4M4L8	C4LZ01	C4M483	C4M7G3	C4LZN4	C4M6P6	C4LUC7	C4LUC7	Q1EQ46	C4M2W3	C4LXE4	C4M0E0
			C4LTA0				Q8MZU6	C4LZM7		C4M0G3	Q9BLE8	C4M332			C4M299	B1N3K9	C4M609	C4LXI9	B1N3R9	B1N459	C4LUI9	C4M878	C4M4L8	C4M5A0	C4M5A0	C4M6P6	C4MB21	C4M2D4	C4MB90
			C4LVN8					C4M1U6		C4LVS1	Q6AW67	C4LU80			C4LSN4	C4M717	C4M9F9	C4M4L8	C4LY85	C4M8G8	C4M2N9	C4M9V6	C4LXI9	Q1EPX9	Q1EPX9	C4M4L8	C4LUJ0	C4LZ01	C4M8U8
			C4LWW4					C4LZH9		C4MAJ4	B1N3L7				C4LTA0	C4LWW3	C4M4S6	Q1EQ36	C4LX00	C4M2F7	C4M8F6	C4M5K9	C4LU92	C4MBJ7	C4MBJ7	C4LXI9	C4LWF5	C4LXY5	C4M6A9
			C4M2K7					C4M4F0		C4M3I0	Q6AW64				C4LVN8	C4LZ42	C4LWZ7	C4M0Y0	C4M2E4	C4LXH0	C4LYU3	B1N510	C4LSY9	C4M8U8	C4M8U8	C4LU92	C4M5I6	C4LSN2	C4M3P4
			B1N4F4					C4LSR0		Q27647	C4LX84				C4LWW4	C4M9F9	C4LUV3	C4M5I6	C4M296	C4MAK5	C4M3F3	C4LSH8	C4M4L8	C4LX92	C4LX92	C4LSY9	C4LU72	C4M5C6	C4M878
			C4M0Z2					C4LUC2		C4LVR9	C4M5Q7				C4M2K7	C4LT24	O15635	C4LU72	B1N2Z3	C4M658	B1N5A6	C4M5N2	Q1EQ36	Q1EPZ6	Q1EPZ6	C4M4L8	C4LZ27	Q7Z0T4	C4LTW8
			C4M828					C4LT24		B1N2J0	C4MA96				B1N4F4	Q6AW65	C4M0Q2	C4LZ27	B1N2I7	C4LVP9	Q5MAR2	C4M8K8	C4LUJ0	C4M520	C4M520	Q1EQ36	C4LVG4	C4LYX0	C4M9V6
			C4M574					C4LVJ5		Q27648	B1N621				Q5FZP2	C4LVW6	C4LZ42	Q1EQ50	C4LZG9	C4LWV7	C4LZ01	C4LYX6	C4M0Y0	C4M3P4	C4M3P4	C4LUJ0	C4M0P2	Q53UB0	C4M3R9
			C4LXM0					Q9U593		C4M192	C4M2X6				C4LXC1	C4LYJ9	C4LX69	Q1EPY2	C4M727	C4LSD9	B1N3R9	C4LXI9	C4M5I6	Q4VSM4	Q4VSM4	C4M0Y0	C4M3R5	C4LZ47	C4LTT1
			C4M0E0					Q01958		C4M818	C4MAI1				C4M8V6	Q6AW62	C4M431	C4LTL7	C4LT81	C4M666	C4LY85	C4LZQ8	C4LU72	Q1EQ46	Q1EQ46	C4M5I6	C4M717	C4M4E1	C4M9V7
			C4M609					C4LZW8		C4M5D4	C4LZJ5				C4M0Z2	C4M7A5	C4MAB3	C4LWB9	C4M0C2	C4LUW3	C4LX00	C4LZL6	C4LZ27	B1N459	B1N459	C4LU72	B1N3H6	C4M0C6	C4LX06
			C4LZZ0					C4MB71		C4LWJ2	C4M131				C4M828	Q9BLE8	C4LSP0	C4M0P2	B1N306	Q8WQH7	C4M2E4	C4M2W3	C4M3Y9	C4M6P6	C4M6P6	C4LZ27	C4LSV0	C4M081	C4M483
			C4M0T6					C4M8M9		C4M6A4	C4M855				C4LSM1	C4M0Q2	C4LU66	C4M3R5	C4M299	C4MB14	C4M5Z7	C4MB21	Q1EQ50	C4LUQ9	C4LUQ9	C4M3Y9	C4M042	C4M5Z7	C4LSA7
			B1N3F8					B1N4Q6		Q24801					C4LXM0	C4LZ42		Q24806	C4LSN4	C4M1U6	C4M296	C4LUJ0	Q1EPY2	C4M4L8	C4M4L8	Q1EQ50	C4LT24	B1N309	B1N459
			C4LSC4					C4LY36		C4M162					C4M574	C4LVH2		Q9BLF3	C4M8C7	C4M1Q5	B1N2Z3	C4MAW3	C4LTL7	C4M5W4	C4M5W4	Q1EPY2	C4LSV0	C4M9P2	C4LUQ9
			C4LT02					C4LYI8		C4M7F5					C4LSY7	Q6AW67		C4M717	C4M828	C4LSV8	B1N309	C4LWF5	C4LWB9	C4LXI9	C4LXI9	C4LTL7	C4LZ32	C4LVQ1	C4M8G8
			C4M9B0					C4M648		B1N5W3					C4M2M2	C4LYN2		B1N354	C4LSM1	C4LT24	B1N2I7	C4M0B6	C4M0P2	C4LU92	C4LU92	C4LWB9	Q6AW65	C4M299	C4M2F7
			C4LWW8					C4M0S1		C4LZK9					C4M5A0	C4LV75		B1N5I9	C4M2M2	C4LSK1	C4LZG9	C4M5I6	C4M3R5	C4LV20	C4LV20	C4M0P2	C4LYJ9	C4LSN4	C4M8C8
			C4M6A9					C4M8D7		C4M353					C4M0E0	Q6AW64		Q6AW65	C4M5A0	C4LYJ9	C4M727	B1N486	Q24806	C4LZQ8	C4LZQ8	C4M3R5	C4M3N6	C4M2K7	C4LU44
			C4LZG9					C4LUL1		C4M384					Q76L90	C4M770		Q1EQ51	C4M0E0	C4M3C4	C4M0C2	C4LW96	C4M474	C4LSY9	C4LSY9	Q24806	Q6AW62	Q5FZP2	C4LXH0
			C4LTE3							C4LYS1					C4M609	C4LTB5		Q963D1	C4M609	C4M7M0	C4LT81	C4LU72	B1N354	C4M4L8	C4LSG5	C4M474	C4M7A5	C4M1G6	C4MAK5
			C4M9V7							C4M632					C4LU87	C4M3S5		C4M9T7	C4LZZ0	C4LYP7	B1N306	C4LZ27	B1N5I9	Q1EQ36	C4M4L8	B1N354	Q9BLE8	C4M0Z2	C4LSG5
			C4LZN0							C4MAP6					C4LZZ0	C4M5P4		Q6Y0Y5	C4MB90	B1N4F4	C4M299	B1N2H1	Q1EQ51	C4LY44	Q1EQ36	B1N5I9	C4M041	C4LZS8	C4M658
			C4LX06							C4M907					B1N3F8			Q1EQ31	B1N3F8	C4LU38	C4LSN4	C4LVG4	C4M3Z7	C4LUJ0	C4LY44	Q1EQ51	Q6AW67	C4M079	C4LVM7
			B1N459							C4LXT6					C4M7M4			B1N2V8	C4M7M4	C4LYR0	C4M828	C4M0P2	C4M9T7	C4M0Y0	C4LUJ0	C4M3Z7	C4LUZ3	C4LYB3	C4LVP9
			C4M8A9							C4LU66					C4M0T6			B1N424	C4M0T6	C4M2Q1	C4M079	C4M3R5	Q1EQ31	C4M5I6	C4M0Y0	C4M9T7	C4LV75	B1N2Q5	C4LWV7
			C4M2F7							C4M4K6					C4LSC4			Q6AW62	C4LSC4	C4M907	C4M8C7	B1N3K9	B1N2V8	C4LU72	C4M5I6	Q6Y0Y5	C4LYM3	C4LUC7	C4LSD9
			C4M1E1							B1N387					C4LT02			C4M3R0	C4MB22	C4M7T9	C4LSM1	C4M0Q2	B1N424	C4LZ27	C4LU72	Q1EQ31	C4LX08	C4MA51	C4M666
			C4LV64							C4LSV1					C4MAK2			C4LSV2	C4LUP7	C4LSP0	C4M2M2	C4M717	C4M3R0	C4M3Y9	C4LZ27	B1N2V8	Q6AW64	C4LYS4	C4LUW3
			B1N316							C4M2R2					C4M9B0			Q9BLE8	C4LT02	C4LTB5	C4M0E0	B1N3H6	C4LSV2	C4LY12	C4M3Y9	B1N424	C4LX84	C4LV75	C4LU72
			C4M5B7							C4LZC2					C4LWW8			C4LXL1	C4M0I4	C4M2W9	C4M5A0	C4LWW3	C4LXL1	Q1EQ50	C4LY12	C4M3R0	C4LYU0	C4M5A0	C4LZ27
			B1N3R9												Q6SCK6			Q6AW67	C4LWW8	C4M4K6	C4M609	C4LSV0	B1N3L7	C4M8C0	Q1EQ50	C4LSV2	C4M4P4	Q1EPX9	C4LZ58
			C4LXH0												C4M2N7			B1N3L7	C4LVR9	C4LWT3	C4LZZ0	C4LZ42	C4LWI9	Q1EPY2	C4M8C0	C4LXL1	B1N621	C4M609	Q27647
			C4M5J9												C4M6A9			C4MA07	C4M2N7	C4M5P4	C4M7M4	C4M9F9	C4M573	C4LTL7	Q1EPY2	B1N3L7	C4LSP0	C4LU87	Q8WQH7
			C4M5J9												C4LZG9			Q6AW64	C4LZG9	C4M1Z3	C4MB90	C4M042	C4M1A5	C4M0P2	C4LTL7	C4LWI9	C4LTB5	C4M7M4	Q27648
			C4LVZ6												C4M878			C4LX84	C4M878		B1N3F8	C4LT24	C4LZG8	C4LWB9	C4M0P2	C4M573	C4M332	C4M6N7	Q1EQ50
			C4LZ12												C4M310			Q1EQ27	C4LTW8		C4M0T6	C4LSV0	C4LX84	C4M3R5	C4LWB9	C4M1A5	C4M2X6	C4M8U8	C4MB14
			C4LT02												C4M3R9			C4M5Q7	C4LXC0		C4LSC4	C4LZ32	Q1EQ27	Q24806	C4M3R5	C4LZG8	Q1EQ03	C4LT02	C4M1U6
			C4LU13												C4LTE3			C4MA96	C4M310		C4MB22	Q6AW65	C4M5Q7	C4M474	Q24806	C4LX84	C4M5P4	C4LX92	C4M1Q5
			C4MAK5												C4M5K9			B1N621	C4M3R9		C4LUP7	C4LVW6	C4LYU0	Q9BLF3	C4M474	Q1EQ27	C4M3N6	C4MAK2	C4LSV8
			C4LTA0												C4LZN0			C4M2X6	Q4VSM4		C4LT02	C4LYJ9	C4MA96	C4M717	Q9BLF3	C4M5Q7		Q1EPZ6	C4LVS8
			C4M0A4												C4M9V7			C4MAI1	C4M5K9		C4LX92	C4M3N6	B1N621	B1N354	C4M717	C4LYU0		Q6SCK6	C4LT24
			B1N2Z3												C4LX06			Q5NSY2	C4M9V7		C4M0I4	Q6AW62	C4M2X6	B1N5I9	C4LYM6	C4MA96		C4LZB0	C4M3Z7
			C4LU56												B1N459			Q1EPY3	C4LX06		C4LWW8	C4M7A5	C4MAI1	C4M7W2	B1N354	B1N621		C4LZN4	C4LSK1
			B1N336												C4M3C0			Q1EQ03	B1N459		C4LVR9	Q9BLE8	Q1EPY3	Q6AW65	B1N5I9	C4M2X6		C4M3P4	C4LYJ9
			C4M8V1												C4LW81			C4LZJ5	C4M3C0		C4M2N7	C4M041	C4LZJ5	Q1EQ51	C4M7W2	C4MAI1		C4M878	C4M3C4
			C4LVZ6												C4MAZ9			C4M131	C4MAZ9		C4M3P4	C4M0Q2	C4M131	C4M3Z7	Q6AW65	Q1EPY3		C4M9V6	C4M7M0
			C4LWX7												C4M8A9			C4M855	C4M8A9		C4LZG9	C4LZ42	C4M855	Q963D1	Q1EQ51	Q1EQ03		C4M3R9	C4M6L6
			C4LZA2												C4M8G8			C4M5P4	C4M2F7		C4M878	C4LVH2		C4M9T7	C4M3Z7	C4LZJ5		C4LSF7	C4LYP7
			C4LY19												B1N510				C4LSH8		C4LTW8	Q6AW67		Q24801	Q963D1	C4M131		C4LSA7	C4LSV2
			C4LSD9												C4LU03				C4M882		C4LXC0	C4LYN2		C4M378	C4M9T7	C4M855		C4M483	B1N4F4
			C4M666												C4M2F7				C4M8I8		C4M310	C4LUZ3		Q6Y0Y5	Q24801			C4M6P6	B1N3L7
			C4LVB0												C4M1E1				C4M3N9		C4M3R9	C4LV75		Q1EQ31	C4M378			C4LUQ9	C4LU38
			C4LUW3												C4LV64				C4LV64		Q4VSM4	C4LYM3		B1N2V8	Q6Y0Y5			C4M8G8	C4LYR0
			C4M3Y9												C4LZB2				C4M2S3		C4M5K9	C4LX08		B1N424	Q1EQ31			C4M323	C4MB71
			C4M466												C4LW95				C4LW95		C4M9V7	Q6AW64		C4M343	B1N2V8			C4LSH8	C4M2Q1
			C4M938												B1N316				C4M6R1		C4LTX6	C4LX84		Q6AW62	B1N424			C4M5N2	C4M907
			C4MA09												C4M5B7				C4M5B7		C4LX06	C4LYU0		C4LSV2	C4M343			C4LYP1	C4M9X3
			C4LZM7												C4LWA8				B1N3R9		C4LSA7	C4M4P4		C4M3R0	Q6AW62			C4M3N9	C4LVR2
			C4LTQ5												B1N3R9				C4MAV9		B1N459	B1N621		Q9BLE8	C4LSV2			C4M4L8	C4M7T9
			B1N384												C4LXH0				C4LXH0		C4LUQ9	C4LSP0		C4LXL1	C4M3R0			C4LZ08	C4M463
			C4LZH1												C4M8K8				C4M5J9		C4M3C0	C4M770		Q6AW67	Q9BLE8			C4LVH1	C4LU84
			B1N4V3												Q95030				C4LVZ6		C4MAZ9	C4LTB5		B1N3L7	C4LXL1			C4LU44	C4M1F1
			C4LVZ9												C4M310				C4M2I4		C4M8A9	C4M332		C4M399	Q6AW67			C4M7L1	C4LSP0
			B1N4V3												C4M5J9				C4M7U0		C4M2F7	C4M2X6		C4LWI9	B1N3L7			C4LYX6	C4LTB5
			C4M5B7												C4M5J9				C4LT02		C4LYI2	C4M3S5		C4M8C2	C4M399			C4LXI9	C4M2W9
			C4LU13												C4LVZ6				C4LU13		C4LSH8	Q1EQ03		C4M573	C4LWI9			C4LU92	C4M3X0
			C4M8R8												C4M2I4				C4MAK5		C4M882	C4M5P4		C4M8T2	C4M8C2			C4LZQ8	C4M4K6
			C4LW09												C4LZ12				C4M658		C4M8I8	C4M3N6		C4M4S8	C4M573			C4LZ12	C4M131
			B1N3K9												C4M7U0				C4M067		C4M3N9			C4MA07	C4M8T2			C4M7U0	C4LWT3
			C4M0Q2												C4LT02				C4M013		B1N5A8			C4M1A5	C4M4S8			C4LT02	C4M5P4
			C4LWW3												C4LU13				B1N5G3		C4LV64			C4LUT1	C4MA07			C4LSY9	C4M1Z3
			C4M5V7												C4MAK5				C4LVY0		C4M2S3			Q6AW64	C4M1A5			C4M658
			C4LSV8												C4M658				B1N3W3		C4LW95			C4LZG8	C4LUT1			C4LSG5
			C4LZP6												C4M067				C4M2W3		C4M6R1			C4LX84	Q6AW64			C4M067
			C4LTE3												C4LTA0				C4M7C8		C4M5B7			Q1EQ27	C4LZG8			C4MB98
			B1N316												C4M013				C4LU56		B1N3R9			C4M5Q7	C4LX84			C4M4L8
			C4LXM0												C4M0A4				C4LVP9		C4MAV9			C4LYU0	Q1EQ27			C4M0A4
			C4M609												B1N2Z3				B1N336		C4LXH0			C4M1F1	C4M5Q7			C4LZL6
			B1N4V3												C4LVM7				C4LUM3		C4M5J9			C4MA96	C4LYU0			C4M2W3
			C4M9F9												B1N5G3				C4M8V1		C4LVZ6			B1N621	C4M1F1			C4LVP9
			C4LWZ3												B1N3W3				C4MAW3		C4M2I4			C4MAI1	C4MA96			C4LWV7
			C4LZH1												C4LU56				C4LVZ6		C4M7U0			C4M2X6	B1N621			C4MB21
			C4LUV3												C4LVP9				C4MB38		C4LT02			C4M3X0	C4MAI1			C4M0Y0
			C4LU94												B1N336				C4M0B6		C4LU13			Q5NSY2	C4M2X6			C4LUJ0
			C4M123												C4LWV7				C4LWX7		C4MAK5			Q1EPY3	C4M3X0			C4M8V1
			B1N2I3												C4M8V1				C4M0G3		C4M658			C4LZJ5	Q5NSY2			C4MAW3
			C4LT81												C4LVZ6				C4M666		C4LSG5			C4M855	Q1EPY3			C4LUW9
			C4LSK1												C4MA75				C4LVB0		C4M4L8			Q1EQ03	C4LZJ5			C4MB38
			B1N2Z3												C4LYT1				C4MAJ4		C4M067			C4M131	C4M855			C4LWF5
			C4M1E1												C4MB38				B1N486		C4M013			C4M5P4	Q1EQ03			C4LWX7
			C4M7M0												C4M0B6				C4M6H3		C4LVY0				C4M131			C4M0G3
			C4LYP7												C4LWX7				Q86D27		B1N3W3				C4M5P4			C4LY19
			C4LVQ0												C4LZA2				Q27647		B1N4N3							C4M666
			C4LZH1												C4LUP1				C4M2Y7		B1N5G3							C4M5I6
			C4M0Q2												C4LY19				C4LVB2		C4M2W3							C4LUW3
			C4LVN9												C4LSD9				C4M466		C4LU56							C4LU72
			C4LW09												C4LV53				C4M0L4		C4LVP9							C4LZ27
			C4LVB0												C4M307				C4MA09		C4M7C8							C4LVU5
			B1N4F4												C4M666				C4LXG1		B1N336							C4LZ58
			B1N4V3												C4LVB0				B1N2J0		C4LUM3							C4LVK0
			C4LU38												C4MAJ4				Q27648		C4M0Y0							Q27647
			C4LWZ3												B1N486				B1N2H1		C4M8V1							C4M466
			C4LVC0												C4LW96				B1N384		C4LVZ6							B1N5K8
			B1N2Z3												C4M6H3				C4LX61		C4MAW3							Q8WQH7
			C4LVB0												C4LUW3				C4M8C0		C4LUW9							C4LTQ5
			C4LW09												C4M3Y9				C4M4T9		C4MB38							Q27648
			C4M4S8												C4LVK0				C4LVG4		C4M0B6							Q1EQ50
			C4M6F9												C4LVB2				C4M220		C4LWX7							C4M525
			C4M2Q1												C4M466				C4MB14		C4M0G3							C4M4T9
			C4M8P0												C4M938				C4LU13		C4M666							C4LVG4
			C4LWZ3												C4LZM7				C4LWB9		C4MAJ4							C4MB14
			C4M431												C4M0L4				C4M8R8		C4LVB0							Q1EPY2
			C4LYH0												C4MA09				C4LW09		B1N486							C4LTL7
			C4M5B7												Q8WQH7				C4M0Q2		C4M6H3							B1N3B2
			C4LZ69												C4LTQ5				C4LYM6		C4LU72							C4M3R5
			C4LXM0												B1N2H1				B1N3H6		Q86D27							C4M0P2
			C4M1E1												B1N384				C4LWW3		Q27647							Q24806
			C4M569												C4LZH1				C4LUC2		C4M2Y7							Q9BLF3
			B1N2I7												B1N4V3				C4LSR0		C4LVB2							B1N3K9
			C4M4I3												C4LVZ9				C4M4F0		C4M466							C4M0Q2
			C4LWS0												Q2PHE2				C4LZP6		C4M0L4							C4M717
			B1N444												C4M525				C4LSV8		C4MA09							C4LYM6
			C4LSU3												B1N4V3				C4M933		B1N2J0							C4M1Q5
			C4LSR1												C4LVG4				C4LXM0		C4LXG1							B1N3H6
			C4LW40												C4MB14				C4LZ42		B1N2H1							B1N354
			C4M0S1												C4M5B7				C4LWJ2		Q27648							C4LWW3
			C4M1Z3												C4LU13				C4M4S6		B1N384							C4M5V7
															C4M1U6				C4LUV3		C4LX61							C4M4F0
															C4LWB9				C4M7M1		C4M8C0							C4LSV0
															C4M8R8				C4M1P6		C4M4T9							C4LVS8
															C4LW09				C4M5V0		C4LVG4							B1N5I9
															B1N3K9				C4LU94		C4M220							C4M933
															C4M0Q2				C4M123		C4MB14							C4M5D4
															C4M1Q5				C4M491		C4LX20							C4LZ42
															B1N3H6				C4M6A4		C4LU13							C4M609
															C4LZH9				Q01958		C4M3R5							C4LWP4
															C4LWW3				Q24801		C4LWB9							C4M9F9
															C4LUC2				C4M378		C4M8R8							C4M042
															C4M5V7				C4LVW6		C4LSZ7							B1N302
															C4LSR0				C4M162		C4LW09							C4M4S6
															C4M4F0				B1N2I3		C4M0Q2							C4LU18
															C4LZP6				C4M7F5		B1N3H6							C4LWZ7
															C4LTE3				C4LT81		C4LYM6							C4LT24
															C4LSV8				C4LSK1		C4LWW3							C4LSV0
															B1N316				C4LYJ9		C4LSR0							C4LUV3
															C4M933				B1N2Z3		C4M4F0							C4LZ32
															C4M5D4				C4M3C4		C4LUC2							C4M5V0
															C4LXM0				B1N5W3		C4LZP6							Q6AW65
															C4LZ42				Q769I7		C4LSV8							C4LVI7
															C4M609				O15635		C4M933							Q963D1
															B1N4V3				C4LZK9		C4LUA1							C4M9T7
															C4M9F9				C4LWS5		C4LZ42							Q6Y0Y5
															B1N302				C4M1E1		C4LXM0							C4LYJ9
															C4LWZ7				C4M7M0		C4LWJ2							C4M3N6
															C4LW75				C4LYP7		C4M4S6							C4M3C4
															C4LT24				C4LVQ0		C4LUV3							O15635
															C4LWZ3				C4LZH1		C4M7M1							Q6AW62
															C4LVJ5				B1N2N4		C4M1P6							C4M7A5
															C4LUV3				C4M0Q2		C4M5V0							C4M6L6
															C4M1P6				B1N2F9		C4LU94							B1N2N4
															C4LZH1				C4M353		C4M123							C4M3R0
															C4M5V0				C4LVN9		C4M491							C4LSV2
															C4LU94				C4LW09		C4M3Z7							C4M041
															C4M123				C4LVL5		Q01958							Q9BLE8
															C4M1W8				C4M3T5		Q24801							C4M0Q2
															Q9U593				C4LZW8		C4M378							B1N341
															Q01958				C4LVB0		C4LVW6							C4LXL1
															C4LVW6				C4LZ42		C4M162							C4LZ42
															B1N2I3				C4LVH2		B1N2I3							Q6AW67
															C4LT81				B1N4F4		C4LT81							C4LZ72
															C4LSK1				B1N4V3		C4LSK1							B1N3L7
															C4LYJ9				C4LU38		B1N5W3							C4LXB1
															B1N2Z3				C4LYR0		Q769I7							C4LU38
															C4M3C4				C4M384		O15635							C4LYR0
															C4M1E1				C4M1S2		C4LWS5							C4M1S2
															C4M7M0				C4LWZ3		C4M7M0							C4MB71
															C4LYP7				C4LVC0		C4M343							C4LYN2
															C4LVQ0				C4M2G9		C4M6L6							C4M3A8
															C4LZH1				C4MB71		C4LVQ0							C4LUK9
															C4M0Q2				C4LYN2		C4M3R0							C4MA07
															C4LVN9				C4M3A8		C4LZW8							C4LUZ3
															C4LW09				B1N2Z3		C4M3T5							C4LV75
															C4LVL5				C4LVB0		C4LZ42							C4LX69
															C4LZW8				C4LYS1		B1N4F4							C4M431
															C4LVB0				C4M8T2		B1N3L7							C4LYM3
															C4LZ42				C4MAR5		B1N4V3							C4M907
															C4LVH2				C4LW09		C4LU38							C4LX08
															B1N4F4				C4M4S8		C4M399							C4M9X3
															B1N4V3				C4M3S9		C4M1S2							B1N3S7
															C4LU38				C4LUZ3		C4LWZ3							C4LVR2
															C4LYR0				C4M6F9		C4LVC0							C4M2U3
															C4M1S2				C4M632		C4M397							Q6AW64
															C4LWZ3				C4M2Q1		C4M8C2							C4LX84
															C4LVC0				C4LV75		C4LYN2							C4M7T9
															C4M2G9				C4M8P0		B1N2Z3							B1N2Q5
															C4MB71				C4LWZ3		C4LYS1							C4M5Q7
															B1N2Z3				C4MAP6		C4M8T2							C4M463
															C4LVB0				C4LX69		C4LW09							C4LYU0
															C4LW09				C4M431		C4M4S8							C4M4P4
															C4M4S8				C4M907		C4M3S9							C4LU84
															C4M3S9				C4LYH0		C4LUZ3							C4MA96
															C4M6F9				C4M8M9		C4M6F9							B1N621
															C4M2Q1				B1N4Q6		C4M632							C4MAB3
															C4M8P0				C4LX08		C4M2Q1							C4LSP0
															C4LWZ3				C4M9X3		C4LV75							C4LTB5
															C4M431				C4LY36		C4M907							C4M332
															C4M907				B1N3S7		C4LUT1							C4MAI1
															C4LYH0				C4LVR2		C4LX08							C4M2X6
															C4M8M9				C4M2U3		B1N3S7							C4LUN0
															B1N4Q6				C4M5B7		C4M1J2							Q5NSY2
															C4M9X3				C4LZ69		C4LXM0							C4LU66
															C4LY36				C4M7T9		C4M463							C4M7I1
															C4LVR2				C4M1J2		C4LU84							C4M4K6
															C4M2U3				C4LXM0		C4M569							C4M648
															C4M5B7				C4LXT6		C4M1F1							Q1EPY3
															C4LZ69				C4M1E1		C4MA96							C4LZJ5
															C4M7T9				C4LU84		C4LSR6							C4M855
															C4LXM0				C4M569		C4MAB3							Q1EQ03
															C4M1E1				B1N2I7		C4M770							C4M131
															C4LU84				C4LWN1		C4LYI8							C4M472
															C4M569				C4M4I3		C4MAI1							C4M5P4
															B1N2I7				C4LSR6		C4LUN0							C4M3N6
															C4LWN1				C4MAB3		C4M3S5							C4LU80
															C4M4I3				C4LSP0		C4M3X0							C4M295
															C4LSP0				C4LYI8		C4LSU3							O15729
															C4LYI8				C4M770		C4LUN7
															C4M770				C4LWS0		Q8MZU6
															C4LWS0				C4LTB5		C4M855
															C4LTB5				C4M3S5		C4LWT3
															C4M3S5				C4M2W9		C4M8D7
															C4LXX7				C4LUN0		O15729
															B1N444				C4LXX7		C4LZ95
															C4LSU3				B1N444		C4M660
															C4M4K6				C4LU66		C4M096
															C4M648				C4LSU3		B1N2W4
															C4LSR1				C4M4K6		C4M7X2
															Q8MZU6				C4M648		C4M298
															C4LW40				C4LSR1		C4LSK4
															C4M0S1				B1N387		B1N3S0
															C4M5P4				Q8MZU6		C4LSS0
															C4M8D7				C4LW40		C4M419
															C4M1Z3				C4M0S1		C4LZS2
															C4LUL1				C4M472		C4LYV2
															O15729				C4M8B5		C4LWG9
															C4LZ95				C4LWT3		C4LV24
															C4M660				C4M5P4		C4M3F3
															C4M096				C4M8D7		C4M8B8
															B1N2W4				C4LSV1		B1N5I9
															C4M7X2				C4M1Z3		B1N2I3
															C4M298				C4LUL1		B1N4V3
															C4LWG9				C4M2R2		B1N3R9
															C4M419				C4LZC2		C4M6U0
															C4LZS2				O15729		C4M5B7
															C4LYV2				C4LZ95		C4M846
															C4LV24				C4M660		C4M4H1
															C4M8B8				C4M096		C4LYJ7
															C4M3F3				B1N2W4		Q8WR14
															B1N2I3				C4M7X2		C4M8B0
															B1N4V3				C4M298		B1N4I3
															B1N3R9				C4LWG9		C4LZT0
															C4M6U0				C4LSS0		C4M5A0
															C4M5B7				C4M419		C4M6Z7
															C4M846				C4LZS2		B1N373
															C4M4H1				C4LYV2		C4LSM2
															C4M5A0				C4LV24		C4M746
															C4LZT0				C4M8B8		C4LXY5
															B1N373				C4M3F3		C4LSN2
															C4LSM2				B1N2I3		C4LYX0
															C4LXY5				B1N4V3		C4M5C6
															C4LU56				B1N3R9		C4LU56
															C4M036				C4M6U0		C4LZ47
															C4M9C0				C4M5B7		C4M036
															C4M2C4				C4M846		C4M9C0
															C4LXT9				C4LYJ7		C4LTS3
															C4MAN6				C4M4H1		C4M2C4
																			C4M5A0		C4M081
																			C4LZT0		C4LXT9
																			C4M6Z7		C4MAN6
																			B1N373		C4M981
																			C4LSM2		C4M4W9
																			C4M746		C4LVN8
																			C4LXY5		C4LTA0
																			C4M5C6		C4LWW4
																			C4LU56		C4M2K7
																			C4LZ47		Q5FZP2
																			C4M036		B1N4F4
																			C4M9C0		C4LXC1
																			C4LTS3		C4M8V6
																			C4M2C4		C4M0Z2
																			C4LXT9		C4LXM0
																			C4MAN6		C4M574
																			C4M4W9		C4LSY7
																			C4LTA0		C4LYS4
																			C4LVN8		C4LUC7
																			C4LWW4		C4MA51
																			C4M2K7		C4LV75
																			B1N4F4		Q76L90
																			Q5FZP2		C4LU87
																			C4LXC1		C4M8U8
																			C4M8V6		C4M285
																			C4M0Z2		C4MAK2
																			C4LXM0		C4M9B0
																			C4M574		C4M520
																			C4LSY7		Q6SCK6
																			C4MA51		C4LZB0
																			C4LYS4		Q86S08
																			C4LV75		C4M6A9
																			Q76L90		C4M9V6
																			C4LU87		C4LTT1
																			C4MAK2		C4LTE3
																			C4M9B0		C4LSF7
																			Q6SCK6		C4LZN0
																			C4M520		C4M483
																			C4LZB0		C4LW81
																			C4M6A9		B1N510
																			Q86S08		C4M8G8
																			C4M9V6		C4LU03
																			C4LTE3		C4M3Q0
																			C4LZN0		C4M1E1
																			C4M483		C4LXG4
																			C4LW81		C4M5N2
																			C4M8G8		C4LVR9
																			B1N510		C4M4L8
																			C4LU03		C4M8C8
																			C4LXG4		C4LZB2
																			C4M1E1		C4M5W4
																			C4M5N2		B1N316
																			C4LVR9		C4MA90
																			C4LZB2		C4LWA8
																			C4M5W4		C4LU44
																			B1N316		C4M7L1
																			C4LWA8		Q95030
																			C4M8K8		C4M8K8
																			C4M7L1		C4M310
																			Q95030		C4M5J9
																			C4M310		O96908
																			C4M5J9		C4LV20
																			O96908		C4LZ12
																			C4LV20		C4M6I7
																			C4LZ12		C4LSY9
																			C4M6I7		C4M0A4
																			C4LSY9		C4LTA0
																			C4LTA0		C4LVM7
																			C4M0A4		B1N2Z3
																			B1N2Z3		C4LWV7
																			C4LVM7		C4LY44
																			C4LWV7		C4LYT1
																			C4MA75		C4MA75
																			C4LYT1		C4LV07
																			C4M5D7		C4M2S8
																			C4LZA2		C4LZA2
																			C4LUP1		C4LUP1
																			C4LVS1		C4M5D7
																			C4LY19		C4LVS1
																			C4LSD9		C4LY19
																			C4LV53		C4LSD9
																			C4M307		C4LV53
																			C4LW96		C4M307
																			C4LUW3		C4LW96
																			C4M0A8		C4LUW3
																			C4LVU5		C4M0A8
																			C4M3Y9		C4LZ27
																			C4LVK0		C4LVU5
																			C4M8S6		C4LZ58
																			C4M3I0		C4M3Y9
																			C4M938		C4LVK0
																			C4LZM7		C4M8S6
																			B1N5K8		C4M3I0
																			C4LVR9		C4M938
																			Q8WQH7		C4LZM7
																			C4LTQ5		B1N5K8
																			C4LZH1		C4M213
																			B1N4V3		C4LVR9
																			C4M192		Q8WQH7
																			C4LVZ9		C4LTQ5
																			Q2PHE2		C4LZH1
																			C4M525		B1N4V3
																			B1N4V3		C4LVZ9
																			C4M5B7		C4M192
																			C4M1U6		Q2PHE2
																			C4M818		Q1EQ50
																			B1N3K9		C4M525
																			C4M1Q5		C4LVW1
																			C4LZH9		B1N4V3
																			C4M5V7		C4LTL7
																			C4LTE3		C4M5B7
																			B1N316		C4M1U6
																			C4M5D4		C4M818
																			C4M609		Q24806
																			B1N4V3		B1N3K9
																			C4M9F9		C4M1Q5
																			B1N302		B1N354
																			C4LU18		C4LZH9
																			C4LWZ7		C4M5V7
																			C4LW75		C4M982
																			C4LT24		C4LTE3
																			C4LWZ3		B1N316
																			C4LVJ5		C4LVS8
																			C4LZH1		B1N5I9
																			C4M9S5		C4M5D4
																			C4M1W8		C4M609
																			Q9U593		C4M7W2
																					B1N4V3
																					C4M9F9
																					B1N302
																					C4LU18
																					C4LWZ7
																					C4LW75
																					C4LT24
																					C4LWZ3
																					C4LVJ5
																					C4M9S5
																					C4LZH1
																					C4M1W8
																					Q9U593
																					C4M9T7
																					C4M6A4
																					C4M7F5
																					C4LYJ9
																					C4M3C4
																					B1N2Z3
																					C4M1E1
																					C4LZK9
																					C4LYP7
																					C4LZH1
																					B1N2N4
																					C4M2F0
																					C4LSV2
																					C4M0Q2
																					B1N2F9
																					C4LVN9
																					C4LW09
																					C4M353
																					C4LVL5
																					C4LVB0
																					C4LXL1
																					C4LVH2
																					C4LYR0
																					C4M384
																					C4M2G9
																					C4MB71
																					C4M3A8
																					C4M573
																					C4LVB0
																					C4MAR5
																					C4LXK3
																					C4M8P0
																					C4LWZ3
																					C4MAP6
																					C4LX69
																					C4M431
																					C4M8M9
																					C4LYH0
																					B1N4Q6
																					C4M9X3
																					C4LY36
																					C4LVR2
																					C4M2U3
																					C4LZ69
																					C4M5B7
																					C4LX84
																					C4M7T9
																					C4LXT6
																					C4M5Q7
																					C4M1E1
																					B1N2I7
																					C4LWN1
																					C4M4I3
																					C4LZI8
																					C4LSP0
																					C4LWS0
																					C4LTB5
																					C4M2W9

## Sheet: Functional Cat. CLS
	Entamoeba histolytica (REF)	Proteins identified in our study
PANTHER GO-Slim Biological Process	#	#	Expected	Fold Enrichment	+/-	P value
generation of precursor metabolites and energy	41	18	1.98	> 5	+	4.8e-10
respiratory electron transport chain	17	8	0.82	> 5	+	0.000293
sulfur compound metabolic process	16	5	0.77	> 5	+	0.15
cellular amino acid catabolic process	17	5	0.82	> 5	+	0.195
glycolysis	13	4	0.63	> 5	+	0.49
tricarboxylic acid cycle	6	3	0.29	> 5	+	0.409
cyclic nucleotide metabolic process	1	1	0.05	> 5	+	1
polyphosphate catabolic process	2	1	0.1	> 5	+	1
ferredoxin metabolic process	3	1	0.14	> 5	+	1
oxidative phosphorylation	3	1	0.14	> 5	+	1
mRNA processing	160	1	7.72	< 0.2	-	0.459
RNA splicing, via transesterification reactions	48	0	2.32	< 0.2	-	1
porphyrin-containing compound metabolic process	5	0	0.24	< 0.2	-	1
meiosis	4	0	0.19	< 0.2	-	1
response to endogenous stimulus	2	0	0.1	< 0.2	-	1
RNA splicing	51	0	2.46	< 0.2	-	1
chromatin assembly	1	0	0.05	< 0.2	-	1
pinocytosis	1	0	0.05	< 0.2	-	1
protein methylation	8	0	0.39	< 0.2	-	1
nitric oxide biosynthetic process	1	0	0.05	< 0.2	-	1
regulation of gene expression, epigenetic	1	0	0.05	< 0.2	-	1
protein ADP-ribosylation	1	0	0.05	< 0.2	-	1
DNA recombination	29	0	1.4	< 0.2	-	1
amino acid transport	14	0	0.68	< 0.2	-	1
7-methylguanosine mRNA capping	4	0	0.19	< 0.2	-	1
reproduction	5	0	0.24	< 0.2	-	1
peroxisomal transport	5	0	0.24	< 0.2	-	1
response to external stimulus	22	0	1.06	< 0.2	-	1
RNA catabolic process	29	0	1.4	< 0.2	-	1
vitamin catabolic process	1	0	0.05	< 0.2	-	1
extracellular transport	1	0	0.05	< 0.2	-	1
regulation of carbohydrate metabolic process	45	0	2.17	< 0.2	-	1
DNA replication	72	0	3.47	< 0.2	-	1
asymmetric protein localization	1	0	0.05	< 0.2	-	1
mitochondrion organization	2	0	0.1	< 0.2	-	1
mitochondrial transport	2	0	0.1	< 0.2	-	1
mRNA splicing, via spliceosome	67	0	3.23	< 0.2	-	1
defense response to bacterium	1	0	0.05	< 0.2	-	1
fatty acid biosynthetic process	2	0	0.1	< 0.2	-	1
response to pheromone	2	0	0.1	< 0.2	-	1
response to toxic substance	8	0	0.39	< 0.2	-	1
mRNA transcription	5	0	0.24	< 0.2	-	1
regulation of cellular amino acid metabolic process	1	0	0.05	< 0.2	-	1
gluconeogenesis	3	0	0.14	< 0.2	-	1
phosphate ion transport	4	0	0.19	< 0.2	-	1
cytoskeleton organization	13	3	0.63	4.78	+	1
homeostatic process	22	5	1.06	4.71	+	0.583
monosaccharide metabolic process	47	10	2.27	4.41	+	0.0152
proteolysis	160	31	7.72	4.01	+	1.47e-08
pyrimidine nucleobase metabolic process	31	6	1.5	4.01	+	0.543
protein folding	91	17	4.39	3.87	+	0.0004
phagocytosis	27	5	1.3	3.84	+	1
receptor-mediated endocytosis	78	14	3.76	3.72	+	0.0045
RNA localization	17	3	0.82	3.66	+	1
regulation of phosphate metabolic process	17	3	0.82	3.66	+	1
cation transport	54	9	2.61	3.45	+	0.182
vitamin biosynthetic process	6	1	0.29	3.45	+	1
translation	253	41	12.21	3.36	+	3.18e-09
chromosome segregation	19	3	0.92	3.27	+	1
endocytosis	146	23	7.05	3.26	+	0.000138
protein complex assembly	77	12	3.72	3.23	+	0.0567
protein complex biogenesis	77	12	3.72	3.23	+	0.0567
nucleobase-containing compound transport	20	3	0.97	3.11	+	1
cellular amino acid metabolic process	87	13	4.2	3.1	+	0.0493
carbohydrate metabolic process	209	31	10.09	3.07	+	6.88e-06
fatty acid metabolic process	21	3	1.01	2.96	+	1
lysosomal transport	14	2	0.68	2.96	+	1
cellular calcium ion homeostasis	7	1	0.34	2.96	+	1
pentose-phosphate shunt	7	1	0.34	2.96	+	1
carbohydrate transport	15	2	0.72	2.76	+	1
ion transport	76	10	3.67	2.73	+	0.55
cytokinesis	31	4	1.5	2.67	+	1
cholesterol metabolic process	16	2	0.77	2.59	+	1
cellular component movement	100	12	4.83	2.49	+	0.493
purine nucleobase metabolic process	35	4	1.69	2.37	+	1
transport	629	71	30.36	2.34	+	2.79e-09
localization	643	71	31.03	2.29	+	7.41e-09
intracellular protein transport	394	43	19.01	2.26	+	9.27e-05
cellular component biogenesis	193	21	9.31	2.25	+	0.0715
vesicle-mediated transport	352	38	16.99	2.24	+	0.000546
protein metabolic process	1097	118	52.94	2.23	+	1.7e-15
protein transport	427	46	20.61	2.23	+	5.27e-05
protein acetylation	20	2	0.97	2.07	+	1
cellular component morphogenesis	10	1	0.48	2.07	+	1
vitamin metabolic process	10	1	0.48	2.07	+	1
anatomical structure morphogenesis	10	1	0.48	2.07	+	1
developmental process	10	1	0.48	2.07	+	1
cellular component organization or biogenesis	492	46	23.74	1.94	+	0.00212
primary metabolic process	2001	186	96.57	1.93	+	1.8e-20
metabolic process	2528	232	122	1.9	+	3.76e-28
cellular component organization	364	33	17.57	1.88	+	0.0593
steroid metabolic process	22	2	1.06	1.88	+	1
mRNA polyadenylation	11	1	0.53	1.88	+	1
nuclear transport	45	4	2.17	1.84	+	1
lipid transport	34	3	1.64	1.83	+	1
protein glycosylation	49	4	2.36	1.69	+	1
cellular process	1489	113	71.86	1.57	+	3.52e-05
organelle organization	163	12	7.87	1.53	+	1
cellular amino acid biosynthetic process	41	3	1.98	1.52	+	1
biosynthetic process	153	11	7.38	1.49	+	1
lipid metabolic process	156	11	7.53	1.46	+	1
exocytosis	88	6	4.25	1.41	+	1
coenzyme metabolic process	15	1	0.72	1.38	+	1
rRNA metabolic process	106	7	5.12	1.37	+	1
regulation of translation	76	5	3.67	1.36	+	1
polysaccharide metabolic process	112	7	5.41	1.3	+	1
cellular defense response	16	1	0.77	1.3	+	1
protein localization	65	4	3.14	1.28	+	1
glycogen metabolic process	83	5	4.01	1.25	+	1
response to stimulus	404	24	19.5	1.23	+	1
cell communication	491	29	23.7	1.22	+	1
regulation of biological process	322	19	15.54	1.22	+	1
regulation of cell cycle	17	1	0.82	1.22	+	1
nitrogen compound metabolic process	293	17	14.14	1.2	+	1
response to stress	325	18	15.68	1.15	+	1
protein lipidation	18	1	0.87	1.15	+	1
tRNA metabolic process	55	3	2.65	1.13	+	1
catabolic process	148	8	7.14	1.12	+	1
mRNA 3'-end processing	19	1	0.92	1.09	+	1
biological regulation	672	35	32.43	1.08	+	1
mitosis	155	8	7.48	1.07	+	1
nucleobase-containing compound metabolic process	802	38	38.71	0.98	-	1
regulation of molecular function	352	15	16.99	0.88	-	1
regulation of catalytic activity	352	15	16.99	0.88	-	1
protein targeting	72	3	3.47	0.86	-	1
cellular protein modification process	569	23	27.46	0.84	-	1
anion transport	26	1	1.25	0.8	-	1
cell cycle	490	18	23.65	0.76	-	1
phosphate-containing compound metabolic process	381	14	18.39	0.76	-	1
regulation of transcription from RNA polymerase II promoter	87	3	4.2	0.71	-	1
RNA metabolic process	480	16	23.17	0.69	-	1
chromatin organization	62	2	2.99	0.67	-	1
regulation of nucleobase-containing compound metabolic process	161	5	7.77	0.64	-	1
phospholipid metabolic process	71	2	3.43	0.58	-	1
transcription from RNA polymerase II promoter	198	5	9.56	0.52	-	1
Unclassified	5209	129	251.39	0.51	-	0
DNA repair	83	2	4.01	0.5	-	1
transcription, DNA-dependent	218	5	10.52	0.48	-	1
DNA metabolic process	164	3	7.91	0.38	-	1
protein phosphorylation	369	6	17.81	0.34	-	0.124

## Sheet: Enrichment CLS <0.05
	Entamoeba histolytica (REF)	Proteins identified in our study
PANTHER GO-Slim Biological Process	#	#	Expected	Fold Enrichment	+/-	P value
respiratory electron transport chain	17	8	0.82	> 5	+	0.000293
generation of precursor metabolites and energy	41	20	1.98	> 5	+	4.8e-10
monosaccharide metabolic process	47	12	2.27	4.41	+	0.0152
proteolysis	160	31	7.72	4.01	+	1.47e-08
protein folding	91	17	4.39	3.87	+	0.0004
receptor-mediated endocytosis	78	14	3.76	3.72	+	0.0045
translation	253	57	12.21	3.36	+	3.18e-09
endocytosis	146	23	7.05	3.26	+	0.000138
cellular amino acid metabolic process	87	13	4.2	3.1	+	0.0493
carbohydrate metabolic process	209	33	10.09	3.07	+	6.88e-06
transport	629	73	30.36	2.34	+	2.79e-09
localization	643	73	31.03	2.29	+	7.41e-09
intracellular protein transport	394	44	19.01	2.26	+	9.27e-05
vesicle-mediated transport	352	39	16.99	2.24	+	0.000546
protein transport	427	47	20.61	2.23	+	5.27e-05
protein metabolic process	1097	137	52.94	2.23	+	1.7e-15
cellular component organization or biogenesis	492	30	23.74	1.94	+	0.00212
primary metabolic process	2001	208	96.57	1.93	+	1.8e-20
metabolic process	2528	255	122	1.9	+	3.76e-28
cellular process	1489	118	71.86	1.57	+	3.52e-05
Unclassified	5209	129	251.39	0.51	-	0

## Sheet: Proteins ID's CLS
Respiratory electron transport chain	Generation of precursor metabolites and energy	Monosaccharide metabolic process	Proteolysis	Protein folding	Receptor-mediated endocytosis	Translation	Endocytosis	Cellular amino acid metabolic process	Carbohydrate metabolic process	Transport	Localization	Intracellular protein transport	Vesicle-mediated transport	Protein transport	Protein metabolic process	Cellular component organization or biogenesis	Primary metabolic process	Metabolic process	Cellular process
Accesion protein Uniprot	Accesion protein Uniprot	Accesion protein Uniprot	Accesion protein Uniprot	Accesion protein Uniprot	Accesion protein Uniprot	Accesion protein Uniprot	Accesion protein Uniprot	Accesion protein Uniprot	Accesion protein Uniprot	Accesion protein Uniprot	Accesion protein Uniprot	Accesion protein Uniprot	Accesion protein Uniprot	Accesion protein Uniprot	Accesion protein Uniprot		Accesion protein Uniprot	Accesion protein Uniprot	Accesion protein Uniprot
Q24802	Q24802	C4LYJ7	C4LWG9	C4M419	C4M8B0	C4M660	C4LWT9	C4LSS0	C4LXD7	C4LWT9	C4LWT9	C4LWT9	C4LWT9	C4LWT9	C4M660	C4M096	C4M660	C4M660	C4M096
B1N4I3	B1N4I3	C4M6Z7	C4M846	C4M2E4	C4M5Z7	C4M7U2	C4M8B0	C4M4H1	C4M6U0	C4M2N0	C4M2N0	C4M2N0	C4M1Y2	C4M2N0	C4M096	C4LWT9	C4M096	C4M096	C4M0F4
B1N5A6	C4M6Z7	C4LVR9	C4M4H1	C4M2C4	C4M588	C4M7X2	C4M6M0	C4MAS9	C4LWS2	C4M059	C4M059	C4M1Y2	B1N3T5	C4M1Y2	C4M7U2	C4LUZ1	C4M7U2	C4M7U2	C4LWT9
Q4VSM4	B1N5A6	C4LVR9	C4M451	C4M296	C4LX92	C4LYV2	C4M5Z7	C4LUI9	C4LYJ7	Q24802	Q24802	B1N3T5	C4M8B0	B1N3T5	C4M7X2	C4M419	C4M7X2	B1N3Y5	C4LUZ1
C4LTX6	C4LVR9	Q27647	C4LY85	C4LU87	C4M0Y0	B1N2I3	C4M3G6	C4M2K7	C4M6Z7	C4M1Y2	C4M1Y2	C4M8B0	C4M6M0	C4M8B0	C4LUZ1	C4M8E1	C4LUZ1	C4M7X2	C4M8E1
C4LW95	Q86S08	C4LVR9	C4LWW4	C4MAK2	Q1EQ22	C4LYI1	C4M588	C4M6H3	C4M5C6	B1N3T5	B1N3T5	C4M6M0	Q1EQ05	C4M6M0	C4LWG9	C4M2N0	C4LSS0	C4LUZ1	C4M2N0
C4M6H3	Q4VSM4	Q27648	C4M7M4	C4LT65	C4LTL7	C4LU56	C4LX92	Q86D27	C4LUP7	C4M8B0	C4M8B0	C4M5Z7	C4M5Z7	Q1EQ05	C4LYV2	C4M059	C4LWG9	C4M419	C4M059
C4LVW1	C4LTX6	C4M192	C4M3C0	C4M5K9	Q24806	B1N2I7	C4M0Y0	B1N2J0	C4LVR9	C4M5A0	C4M5A0	B1N309	B1N309	C4M5Z7	C4M419	C4M5A0	C4LYV2	C4LSS0	C4M942
	C4LVR9	C4M818	C4MAZ9	C4M067	B1N354	C4LZG9	Q1EQ22	C4M220	Q86S08	C4M6M0	C4M6M0	C4M3G6	C4M3G6	B1N309	B1N2I3	C4M2E4	C4M419	C4LWG9	B1N2S4
	C4LW95	C4LUQ2	C4LU03	C4MB38	C4M3R0	C4LT81	C4M5I6	C4M818	C4M882	Q1EQ05	Q1EQ05	C4M588	C4M588	C4M3G6	C4M6U0	Q1EQ05	C4LXD7	C4LYV2	C4M451
	C4M6H3	C4LU66	Q95030	B1N486	C4M5Q7	B1N306	C4LTL7	C4LU18	C4LVR9	C4M5Z7	C4M5Z7	C4M5Y9	C4LX92	C4M588	C4M846	C4M4E1	B1N2F9	C4LXD7	C4M1Y2
	Q27647	C4LZC2	C4M2I4	C4LVB2	C4MA96	C4LVN8	C4M3R5	O15635	C4M6R1	B1N309	B1N309	C4MBJ7	C4M4L8	C4M5Y9	C4M942	C4M9P2	C4M8E1	B1N2F9	B1N3T5
	C4LVR9		B1N5G3	B1N2H1	C4LZJ5	C4M2K7	Q24806	B1N2N4	C4LVY0	C4M3G6	C4M3G6	C4LX92	C4M4L8	C4MBJ7	C4LYI1	C4LT45	B1N2I3	C4M8E1	C4M8B0
	B1N2J0		C4LTT0	C4M5V0	C4M855	B1N4F4	B1N354		C4M7C8	C4M588	C4M588	Q1EQ40	C4M0Y0	C4LX92	C4M4H1	C4LVQ1	C4M6U0	B1N2I3	C4M5A0
	Q27648		C4LYT1	C4M3S9		C4LWW4	Q6AW65		C4LUM3	C4M5Y9	C4M5Y9	C4M4L8	Q1EQ22	Q1EQ40	C4M451	C4M5A0	C4LWS2	C4M6U0	C4LUI9
	C4M192		C4LV53	C4M770		C4LXM0	Q6AW62		C4M3I0	C4M5A0	C4M5A0	C4LU92	C4M5I6	C4M4L8	C4M5A0	C4LT65	Q24802	C4LWS2	C4M2D4
	C4LVW1		C4M307	C4M3S5		C4M0T6	C4M3R0		Q27647	C4MBJ7	C4MBJ7	C4LSY9	C4LU72	C4LU92	C4LY85	C4M5K9	C4M846	Q24802	C4LSL1
	C4LU66		C4M0L4			C4M9B0	Q9BLE8		C4LVR9	C4LX92	C4LX92	C4M4L8	Q1EPY2	C4LSY9	C4M2E4	C4MB21	C4M942	C4M846	C4M5C6
	C4LSV1		C4LZM7			C4LT02	C4M5Q7		B1N2J0	Q4VSM4	Q4VSM4	C4LUJ0	C4LTL7	C4M4L8	C4LU56	C4LUJ0	C4LYJ7	C4M942	C4M6M0
	C4LZC2		C4LSR0			C4LZG9	C4MA96		Q27648	C4LUQ9	C4LUQ9	C4M0Y0	C4M3R5	C4LUJ0	C4M2C4	C4LTN5	C4LYI1	C4LYI1	C4LX23
			Q9U593			C4LZN0	B1N621		C4M192	C4M4L8	C4M4L8	C4M1T1	Q24806	C4M0Y0	C4M296	C4LWF5	C4M4H1	C4M4H1	Q1EQ05
			CPP2			C4M1E1	C4LZJ5		C4M818	Q1EQ40	Q1EQ40	C4M6H8	Q9BLF3	C4M1T1	C4LZG9	C4M5I6	C4M451	C4LYJ7	C4M4E1
			C4M3N5			C4LV64	C4M855		C4LWJ2	C4LYV5	C4LYV5	Q1EQ22	B1N354	C4M6H8	B1N2I7	B1N486	C4MAS9	C4M451	C4M5Z7
			C4LZW8			B1N316			C4LZJ2	C4LU92	C4LU92	C4M5I6	Q6AW65	Q1EQ22	C4LXT9	C4LU72	C4M5A0	Q8WR14	B1N309
			C4MB71			C4LVZ6			C4LUQ2	C4LV20	C4LV20	C4LU72	Q1EQ51	C4M5I6	C4LT81	B1N2H1	C4M6Z7	C4MAS9	C4M9P2
			B1N4Q6			C4LT02			Q24801	C4LSY9	C4LSY9	C4M3Y9	Q963D1	C4LU72	B1N306	C4LVG4	C4LUI9	C4M1Y2	C4M3G6
			C4LTV0			C4LU56			C4M7F5	C4M4L8	C4M4L8	Q1EPY2	Q6Y0Y5	C4M3Y9	C4LVN8	C4M3R5	C4LY85	C4M8B0	C4LT45
			C4LYI8			B1N336			C4LXT6	C4LUJ0	C4LUJ0	C4LTL7	Q6AW62	Q1EPY2	C4M2K7	C4LZ42	C4M5C6	B1N4I3	C4M588
			C4M0S1			C4LVZ6			C4LU66	C4M0Y0	C4M0Y0	C4M3R5	C4M3R0	C4LTL7	Q5FZP2	Q6AW65	C4M2E4	C4M5A0	C4LVQ1
			C4M8D7			C4LZA2			B1N387	C4M1T1	C4M1T1	Q24806	Q9BLE8	C4M3R5	B1N4F4	C4LYJ9	C4LU56	C4M6Z7	C4M2K7
			C4LUL1			C4M7U2			C4LSV1	C4M6H8	C4M6H8	C4M474	C4MA07	Q24806	C4LWW4		C4M2C4	C4LUI9	Q5FZP2
						C4LUW3			C4M2R2	Q1EQ22	Q1EQ22	B1N354	Q1EPZ7	C4M474	C4LXM0		C4M296	C4LSL1	C4M5A0
						C4M3Y9			C4LZC2	C4M5I6	C4M5I6	Q1EQ51	Q1EQ27	B1N354	C4LSM1		C4LZG9	B1N5A6	C4LU87
						C4M938				C4LU72	C4LU72	C4M916	C4M5Q7	Q1EQ51	C4M5A0		B1N2I7	C4LY85	C4M7M4
						C4MA09				C4M3Y9	C4M3Y9	C4M3R0	B1N621	Q6Y0Y5	C4LU87		C4LT45	C4M5C6	C4LT02
						C4LZM7				C4M8C0	C4M8C0	C4LWI9	C4MA96	C4M916	C4M7M4		C4LXT9	C4M6M0	C4LX92
						B1N384				Q1EPY2	Q1EPY2	Q1EPZ7	C4LZJ5	C4M3R0	C4M0T6		C4LT81	C4M2E4	C4MAK2
						C4LVZ9				C4LTL7	C4LTL7	Q1EQ27	C4M855	C4LWI9	C4LT02		B1N306	C4LU56	C4M483
						C4M8R8				C4M3R5	C4M3R5	C4M5Q7	Q1EQ03	Q1EPZ7	C4M9B0		C4LVN8	C4LX23	C4LUQ9
						C4LZP6				Q24806	Q24806	C4LYU0		Q1EQ27	C4MAK2		C4M2K7	C4M5Z7	C4M8G8
						B1N316				C4M474	C4M474	B1N621		C4M5Q7	C4LT65		Q5FZP2	C4M2C4	C4M4L8
						C4LXM0				Q9BLF3	Q9BLF3	C4MA96		C4LYU0	C4LZG9		B1N4F4	C4M296	C4LW92
						C4LWZ3				B1N354	B1N354	C4LZJ5		B1N621	C4M5K9		C4LWW4	B1N309	C4LU92
						B1N2I3				C4M7W2	C4M7W2	C4M855		C4MA96	C4M310		C4LXM0	C4LZG9	C4LSY9
						C4LT81				C4LZJ2	C4LZJ2			C4LZJ5	C4LZN0		C4LSM1	C4M3G6	C4LT02
						C4M1E1				Q6AW65	Q6AW65			C4M855	C4M3C0		C4M5A0	B1N2I7	C4M7U0
						C4M3N5				Q1EQ51	Q1EQ51			Q1EQ03	C4MAZ9		C4LU87	C4LT45	C4M658
						B1N4F4				Q963D1	Q963D1				C4M8G8		C4M7M4	C4LXT9	C4M4L8
						C4LWZ3				Q24801	Q24801				C4M6J3		C4M0T6	C4LT81	C4M067
						C4M8P0				C4M378	C4M378				C4LU03		C4LUP7	C4M588	C4MB98
						C4LWZ3				Q6Y0Y5	Q6Y0Y5				C4M1E1		C4LT02	B1N306	C4MB21
						C4LZ69				Q6AW62	Q6AW62				C4LV64		C4M9B0	C4LVN8	C4M0Y0
						C4LXM0				C4M343	C4M343				C4LW95		C4MAK2	C4M2K7	C4LUJ0
						C4M1E1				C4M916	C4M916				B1N316		C4LVR9	Q5FZP2	C4LTN5
						C4M569				C4M3R0	C4M3R0				C4LW92		C4LT65	B1N4F4	C4MB38
						B1N2I7				Q9BLE8	Q9BLE8				Q95030		Q86S08	C4LWW4	C4LWF5
						C4M0S1				C4M399	C4M399				C4M310		C4LZG9	C4LXM0	C4M5I6
										C4LWI9	C4LWI9				C4LYG2		C4M5K9	C4LSM1	C4LUW3
										C4M8C2	C4M8C2				C4LVZ6		Q4VSM4	C4M5A0	C4LU72
										C4M8T2	C4M8T2				C4M2I4		C4M310	C4LU87	Q27647
										C4MA07	C4MA07				C4LT02		C4LZN0	C4M7M4	Q27648
										Q1EPZ7	Q1EPZ7				C4M7U0		C4M483	C4M0T6	C4M525
										Q1EQ27	Q1EQ27				C4M658		C4M3C0	C4LUP7	C4LVG4
										C4M5Q7	C4M5Q7				C4M067		C4MAZ9	C4M285	Q1EPY2
										C4LYU0	C4LYU0				B1N5G3		C4M8G8	C4LT02	C4LTL7
										C4MA96	C4MA96				C4LTT0		C4M6J3	C4LX92	C4M3R5
										B1N621	B1N621				C4LU56		C4LU03	C4M9B0	Q24806
										C4LZ23	C4LZ23				B1N336		C4LXG4	C4MAK2	Q9BLF3
										C4M3X0	C4M3X0				C4LVZ6		C4M1E1	C4LVR9	B1N354
										C4LU65	C4LU65				C4MB38		C4M882	C4LT65	C4LZ42
										C4LZJ5	C4LZJ5				C4LYT1		C4LVR9	Q86S08	C4LWP4
										C4M855	C4M855				C4LZA2		C4LV64	C4LZG9	C4M546
										Q1EQ03	Q1EQ03				C4M307		C4M2S3	Q4VSM4	C4M9K5
															C4LV53		C4LW95	C4M5K9	C4LU18
															B1N486		B1N316	C4M310	C4M8M0
															C4M7U2		C4M6R1	C4LTX6	C4M5V0
															C4M6H3		C4LW92	C4LZN0	Q6AW65
															C4LUW3		Q95030	C4M483	C4LVI7
															C4M3Y9		C4M310	C4LUQ9	Q963D1
															C4LVB2		C4LYG2	C4M3C0	Q6Y0Y5
															C4M938		C4LVZ6	C4MAZ9	C4LYJ9
															C4MA09		C4M2I4	C4M8G8	C4M3N6
															C4M0L4		C4LV20	C4M6J3	O15635
															C4LZM7		C4LSY9	C4LU03	Q6AW62
															B1N2H1		C4LT02	C4LXG4	C4M6L6
															B1N384		C4M7U0	C4M3Q0	B1N2N4
															C4LVZ9		C4M658	C4M1E1	C4M741
															C4M525		C4M067	C4M882	C4M3R0
															C4LVG4		C4LVY0	B1N5A8	Q9BLE8
															C4M8R8		B1N5G3	C4M038	C4M041
															C4LSR0		C4LTT0	C4LVR9	C4M515
															C4LZP6		C4M7C8	C4M4L8	B1N341
															B1N316		C4LU56	C4LV64	C4LZ42
															C4LZ42		B1N336	C4M2S3	C4LZ72
															C4LXM0		C4LUM3	C4LW95	C4LXB1
															C4M546		C4M512	B1N316	C4LYR0
															C4LZJ2		C4LVZ6	C4MA90	C4MB71
															C4LWZ3		C4LTN5	C4M6R1	C4LYN2
															C4M1P6		C4MB38	C4LW92	C4MA07
															C4M5V0		C4LYT1	Q95030	C4LYM3
															Q9U593		C4LZA2	C4M310	Q1EPZ7
															C4LUQ2		C4M307	C4LYG2	C4M7T9
															CPP2		C4LV53	C4LVZ6	C4LYU0
															B1N2I3		B1N486	C4M2I4	C4M5Q7
															C4LT81		C4M7U2	C4LT06	C4M4P4
															C4LYJ9		C4M6H3	C4LV20	C4LT85
															C4M1E1		C4LUW3	C4LSY9	C4MA96
															C4M3N5		C4M3Y9	C4LT02	B1N621
															C4LZW8		C4M8S6	C4M7U0	C4LZ23
															C4LVL5		Q86D27	C4M658	C4LTB5
															C4LZ42		C4M3I0	C4M067	C4LU66
															B1N4F4		C4LVB2	C4M4L8	C4LZJ5
															C4LYR0		C4M2Y7	B1N5G3	C4M855
															C4LWZ3		Q27647	C4LVY0	Q1EQ03
															C4MB71		C4M938	C4LTT0	C4M472
															C4M3S9		C4MA09	C4M7C8	C4M3N6
															C4M8P0		C4M0L4	C4LU56	C4M295
															C4LWZ3		C4LZM7	B1N336	O15729
															B1N4Q6		C4LVR9	C4LUM3
															C4LZ69		C4LXG1	C4M0Y0
															C4M7T9		B1N2J0	C4M512
															C4LTV0		Q27648	C4LVZ6
															C4LXM0		B1N2H1	C4LTN5
															C4LT85		B1N384	C4MB38
															C4M1E1		C4LVZ9	C4LYT1
															C4M569		C4M192	C4M2S8
															B1N2I7		C4M525	C4LZA2
															C4LWN1		C4M8C0	C4M307
															C4LYI8		C4LVG4	C4LV53
															C4M770		C4M220	B1N486
															C4LTB5		C4M818	C4M7U2
															C4M3S5		C4M8R8	C4M6H3
															C4LXX7		C4LSR0	C4LUW3
															C4M0S1		C4LZP6	C4LU72
															C4M8D7		B1N316	C4M3Y9
															C4LUL1		C4LZ42	C4M8S6
															O15729		C4LXM0	Q86D27
																	C4LWJ2	C4M3I0
																	C4M546	C4M2Y7
																	C4LZJ2	C4M938
																	C4LU18	C4LVB2
																	C4LWZ3	Q27647
																	C4M1P6	C4LZM7
																	C4M8M0	C4MA09
																	C4M9S5	C4M213
																	C4M7M1	C4M0L4
																	C4M5V0	C4LVR9
																	Q9U593	B1N2J0
																	C4LUQ2	C4LXG1
																	CPP2	Q27648
																	Q24801	B1N2H1
																	C4M378	B1N384
																	B1N2I3	C4LVZ9
																	C4M7F5	C4M192
																	C4LT81	C4M525
																	C4LYJ9	C4M8C0
																	O15635	C4LVW1
																	C4M1E1	C4LVG4
																	C4M1K0	C4M220
																	B1N2N4	C4LX20
																	C4M515	C4LTL7
																	B1N2F9	C4M3R5
																	C4M3N5	C4M818
																	C4LZW8	Q24806
																	C4LVL5	C4M8R8
																	C4LZ42	B1N354
																	B1N4F4	C4LSR0
																	C4LYR0	C4LZP6
																	C4LWZ3	C4M982
																	C4MB71	B1N316
																	C4LYN2	C4LZ42
																	C4M8T2	C4LXM0
																	C4MAR5	C4M7W2
																	C4M3S9	C4LWJ2
																	C4M8P0	C4LZJ2
																	C4LWZ3	C4M546
																	B1N4Q6	C4M9K5
																	C4LZ69	C4LU18
																	C4M7T9	C4LWZ3
																	C4LTV0	C4M1P6
																	C4LXT6	C4M8M0
																	C4M5G0	C4M7M1
																	C4LXM0	C4M9S5
																	C4LT85	C4M5V0
																	C4M1E1	Q9U593
																	C4M569	C4LUQ2
																	B1N2I7	CPP2
																	C4LWN1	Q24801
																	C4LYI8	C4M378
																	C4M770	B1N2I3
																	C4LZ23	C4M7F5
																	C4LTB5	C4LT81
																	C4M3S5	C4LYJ9
																	C4M2W9	C4M1E1
																	C4LXX7	O15635
																	C4LU65	C4M343
																	C4LU66	C4M6L6
																	B1N387	B1N2N4
																	C4M0S1	C4M1K0
																	C4LWT3	C4M3R0
																	C4M472	C4M515
																	C4M8B5	B1N2F9
																	C4M8D7	C4M3N5
																	C4LSV1	C4LVL5
																	C4LUL1	C4LZW8
																	C4M2R2	C4LZ42
																	C4LZC2	B1N4F4
																	O15729	C4LYR0
																		C4M399
																		C4LWZ3
																		C4MB71
																		C4M8C2
																		C4LYN2
																		C4M8T2
																		C4MAR5
																		C4M3S9
																		C4M8P0
																		C4LWZ3
																		B1N4Q6
																		C4LZ69
																		C4M7T9
																		C4LTV0
																		C4LXT6
																		C4M5G0
																		C4LXM0
																		C4M5Q7
																		C4LT85
																		C4M1E1
																		C4M569
																		C4LWN1
																		C4MA96
																		B1N2I7
																		C4LYI8
																		C4M770
																		C4LZ23
																		C4LTB5
																		C4M3S5
																		C4M2W9
																		C4M3X0
																		C4LXX7
																		C4LU65
																		C4LU66
																		B1N387
																		C4M855
																		C4LZJ5
																		C4M0S1
																		C4LWT3
																		C4M472
																		C4M8B5
																		C4M8D7
																		C4LSV1
																		C4LUL1
																		C4M2R2
																		C4LZC2
																		O15729

## Sheet: Functional Cat. Cyst
	Entamoeba histolytica (REF)	Proteins identified in our study
PANTHER GO-Slim Biological Process	#	#	Expected	Fold Enrichment	+/-	P value
mitochondrion organization	2	1	0.06	> 5	+	1
mitochondrial transport	2	1	0.06	> 5	+	1
fatty acid biosynthetic process	2	1	0.06	> 5	+	1
phagocytosis	27	10	0.84	> 5	+	2.44e-06
gluconeogenesis	3	1	0.09	> 5	+	1
cellular calcium ion homeostasis	7	2	0.22	> 5	+	1
fatty acid metabolic process	21	6	0.65	> 5	+	0.00744
meiosis	4	1	0.12	> 5	+	1
phosphate ion transport	4	1	0.12	> 5	+	1
reproduction	5	1	0.16	> 5	+	1
mRNA polyadenylation	11	2	0.34	> 5	+	1
tricarboxylic acid cycle	6	1	0.19	> 5	+	1
lipid transport	34	5	1.06	4.73	+	0.569
amino acid transport	14	2	0.44	4.59	+	1
endocytosis	146	20	4.54	4.4	+	6.16e-06
carbohydrate transport	15	2	0.47	4.29	+	1
coenzyme metabolic process	15	2	0.47	4.29	+	1
chromatin organization	62	8	1.93	4.15	+	0.103
monosaccharide metabolic process	47	6	1.46	4.1	+	0.481
response to toxic substance	8	1	0.25	4.02	+	1
cellular component movement	100	12	3.11	3.86	+	0.0109
regulation of cell cycle	17	2	0.53	3.78	+	1
regulation of phosphate metabolic process	17	2	0.53	3.78	+	1
anion transport	26	3	0.81	3.71	+	1
mRNA 3'-end processing	19	2	0.59	3.38	+	1
protein complex assembly	77	8	2.4	3.34	+	0.394
protein complex biogenesis	77	8	2.4	3.34	+	0.394
organelle organization	163	16	5.07	3.16	+	0.00812
cytokinesis	31	3	0.96	3.11	+	1
DNA repair	83	8	2.58	3.1	+	0.614
regulation of molecular function	352	32	10.95	2.92	+	9.18e-06
regulation of catalytic activity	352	32	10.95	2.92	+	9.18e-06
homeostatic process	22	2	0.68	2.92	+	1
mitosis	155	14	4.82	2.9	+	0.0531
protein folding	91	8	2.83	2.83	+	1
cell communication	491	42	15.28	2.75	+	3.74e-07
cellular component biogenesis	193	16	6	2.66	+	0.0533
cellular component organization	364	30	11.32	2.65	+	0.000182
vesicle-mediated transport	352	29	10.95	2.65	+	0.000279
cellular component organization or biogenesis	492	40	15.31	2.61	+	3.74e-06
glycolysis	13	1	0.4	2.47	+	1
transport	629	48	19.57	2.45	+	8.97e-07
intracellular protein transport	394	30	12.26	2.45	+	0.000864
phosphate-containing compound metabolic process	381	29	11.85	2.45	+	0.00125
biological regulation	672	51	20.91	2.44	+	3.28e-07
protein transport	427	32	13.28	2.41	+	0.000575
localization	643	48	20.01	2.4	+	1.78e-06
response to stimulus	404	30	12.57	2.39	+	0.00139
response to stress	325	23	10.11	2.27	+	0.031
cellular process	1489	105	46.33	2.27	+	1.38e-15
lipid metabolic process	156	11	4.85	2.27	+	1
phospholipid metabolic process	71	5	2.21	2.26	+	1
cell cycle	490	34	15.24	2.23	+	0.00143
DNA recombination	29	2	0.9	2.22	+	1
catabolic process	148	10	4.6	2.17	+	1
DNA metabolic process	164	11	5.1	2.16	+	1
carbohydrate metabolic process	209	14	6.5	2.15	+	0.805
nuclear transport	45	3	1.4	2.14	+	1
regulation of carbohydrate metabolic process	45	3	1.4	2.14	+	1
ion transport	76	5	2.36	2.11	+	1
pyrimidine nucleobase metabolic process	31	2	0.96	2.07	+	1
RNA splicing, via transesterification reactions	48	3	1.49	2.01	+	1
cellular defense response	16	1	0.5	2.01	+	1
proteolysis	160	10	4.98	2.01	+	1
regulation of biological process	322	20	10.02	2	+	0.363
metabolic process	2528	156	78.65	1.98	+	2.08e-21
protein glycosylation	49	3	1.52	1.97	+	1
protein phosphorylation	369	22	11.48	1.92	+	0.372
primary metabolic process	2001	118	62.26	1.9	+	3.31e-12
RNA localization	17	1	0.53	1.89	+	1
cellular amino acid catabolic process	17	1	0.53	1.89	+	1
RNA splicing	51	3	1.59	1.89	+	1
nitrogen compound metabolic process	293	17	9.12	1.86	+	1
protein metabolic process	1097	63	34.13	1.85	+	0.000108
mRNA processing	160	9	4.98	1.81	+	1
nucleobase-containing compound metabolic process	802	45	24.95	1.8	+	0.00983
regulation of nucleobase-containing compound metabolic process	161	9	5.01	1.8	+	1
DNA replication	72	4	2.24	1.79	+	1
protein lipidation	18	1	0.56	1.79	+	1
translation	253	14	7.87	1.78	+	1
cellular protein modification process	569	31	17.7	1.75	+	0.226
regulation of translation	76	4	2.36	1.69	+	1
chromosome segregation	19	1	0.59	1.69	+	1
biosynthetic process	153	8	4.76	1.68	+	1
RNA metabolic process	480	25	14.93	1.67	+	1
receptor-mediated endocytosis	78	4	2.43	1.65	+	1
transcription from RNA polymerase II promoter	198	10	6.16	1.62	+	1
transcription, DNA-dependent	218	11	6.78	1.62	+	1
generation of precursor metabolites and energy	41	2	1.28	1.57	+	1
protein localization	65	3	2.02	1.48	+	1
regulation of transcription from RNA polymerase II promoter	87	4	2.71	1.48	+	1
cellular amino acid metabolic process	87	4	2.71	1.48	+	1
response to external stimulus	22	1	0.68	1.46	+	1
cation transport	54	2	1.68	1.19	+	1
glycogen metabolic process	83	3	2.58	1.16	+	1
exocytosis	88	3	2.74	1.1	+	1
mRNA splicing, via spliceosome	67	2	2.08	0.96	-	1
purine nucleobase metabolic process	35	1	1.09	0.92	-	1
rRNA metabolic process	106	3	3.3	0.91	-	1
protein targeting	72	2	2.24	0.89	-	1
polysaccharide metabolic process	112	3	3.48	0.86	-	1
cellular amino acid biosynthetic process	41	1	1.28	0.78	-	1
tRNA metabolic process	55	1	1.71	0.58	-	1
Unclassified	5209	74	162.06	0.46	-	0
porphyrin-containing compound metabolic process	5	0	0.16	< 0.2	-	1
ferredoxin metabolic process	3	0	0.09	< 0.2	-	1
response to endogenous stimulus	2	0	0.06	< 0.2	-	1
chromatin assembly	1	0	0.03	< 0.2	-	1
pinocytosis	1	0	0.03	< 0.2	-	1
protein methylation	8	0	0.25	< 0.2	-	1
cellular component morphogenesis	10	0	0.31	< 0.2	-	1
nitric oxide biosynthetic process	1	0	0.03	< 0.2	-	1
cyclic nucleotide metabolic process	1	0	0.03	< 0.2	-	1
regulation of gene expression, epigenetic	1	0	0.03	< 0.2	-	1
protein acetylation	20	0	0.62	< 0.2	-	1
protein ADP-ribosylation	1	0	0.03	< 0.2	-	1
oxidative phosphorylation	3	0	0.09	< 0.2	-	1
7-methylguanosine mRNA capping	4	0	0.12	< 0.2	-	1
vitamin metabolic process	10	0	0.31	< 0.2	-	1
peroxisomal transport	5	0	0.16	< 0.2	-	1
cytoskeleton organization	13	0	0.4	< 0.2	-	1
RNA catabolic process	29	0	0.9	< 0.2	-	1
vitamin catabolic process	1	0	0.03	< 0.2	-	1
vitamin biosynthetic process	6	0	0.19	< 0.2	-	1
extracellular transport	1	0	0.03	< 0.2	-	1
cholesterol metabolic process	16	0	0.5	< 0.2	-	1
steroid metabolic process	22	0	0.68	< 0.2	-	1
asymmetric protein localization	1	0	0.03	< 0.2	-	1
nucleobase-containing compound transport	20	0	0.62	< 0.2	-	1
anatomical structure morphogenesis	10	0	0.31	< 0.2	-	1
developmental process	10	0	0.31	< 0.2	-	1
respiratory electron transport chain	17	0	0.53	< 0.2	-	1
defense response to bacterium	1	0	0.03	< 0.2	-	1
polyphosphate catabolic process	2	0	0.06	< 0.2	-	1
response to pheromone	2	0	0.06	< 0.2	-	1
sulfur compound metabolic process	16	0	0.5	< 0.2	-	1
lysosomal transport	14	0	0.44	< 0.2	-	1
pentose-phosphate shunt	7	0	0.22	< 0.2	-	1
mRNA transcription	5	0	0.16	< 0.2	-	1
regulation of cellular amino acid metabolic process	1	0	0.03	< 0.2	-	1

## Sheet: Enrichment Cyst <0.05
	Proteins identified in our study
PANTHER GO-Slim Biological Process	#	Expected	Fold Enrichment	+/-	P value
phagocytosis	10	0.84	> 5	+	2.44e-06
fatty acid metabolic process	6	0.65	> 5	+	0.00744
endocytosis	20	4.54	4.4	+	6.16e-06
cellular component movement	12	3.11	3.86	+	0.0109
organelle organization	16	5.07	3.16	+	0.00812
regulation of molecular function	32	10.95	2.92	+	9.18e-06
regulation of catalytic activity	32	10.95	2.92	+	9.18e-06
cell communication	42	15.28	2.75	+	3.74e-07
cellular component organization	30	11.32	2.65	+	0.000182
vesicle-mediated transport	29	10.95	2.65	+	0.000279
cellular component organization or biogenesis	40	15.31	2.61	+	3.74e-06
transport	30	19.57	2.45	+	8.97e-07
intracellular protein transport	30	12.26	2.45	+	0.000864
phosphate-containing compound metabolic process	29	11.85	2.45	+	0.00125
biological regulation	51	20.91	2.44	+	3.28e-07
protein transport	32	13.28	2.41	+	0.000575
localization	30	20.01	2.4	+	1.78e-06
response to stimulus	30	12.57	2.39	+	0.00139
response to stress	23	10.11	2.27	+	0.031
cellular process	105	46.33	2.27	+	1.38e-15
cell cycle	33	15.24	2.23	+	0.00143
metabolic process	158	78.65	1.98	+	2.08e-21
primary metabolic process	120	62.26	1.9	+	3.31e-12
protein metabolic process	63	34.13	1.85	+	0.000108
nucleobase-containing compound metabolic process	45	24.95	1.8	+	0.00983
Unclassified	74	162.06	0.46	-	0

## Sheet: Proteins ID's Cyst
Phagocytosis	Fatty acid metabolic process	Endocytosis	Cellular component movement	Organelle organization	Regulation of molecular function	Regulation of catalytic activity	Cell communication	Cellular component organization	Vesicle-mediated transport	Cellular component organization or biogenesis	Transport	Intracellular protein transport	Phosphate-containing compound metabolic process	Biological regulation	Protein transport	Localization	Response to stimulus	Response to stress	Cellular process	Cell cycle	Metabolic process	Primary metabolic process	Protein metabolic process	Nucleobase-containing compound metabolic process
Accesion protein Uniprot	Accesion protein Uniprot	Accesion protein Uniprot	Accesion protein Uniprot	Accesion protein Uniprot	Accesion protein Uniprot	Accesion protein Uniprot	Accesion protein Uniprot	Accesion protein Uniprot	Accesion protein Uniprot	Accesion protein Uniprot	Accesion protein Uniprot	Accesion protein Uniprot	Accesion protein Uniprot	Accesion protein Uniprot	Accesion protein Uniprot	Accesion protein Uniprot	Accesion protein Uniprot	Accesion protein Uniprot	Accesion protein Uniprot	Accesion protein Uniprot	Accesion protein Uniprot	Accesion protein Uniprot	Accesion protein Uniprot	Accesion protein Uniprot
C4M429	C4LYU3	C4M429	C4LTI6	C4LW36	C4LXL5	C4LXL5	C4LTI6	C4LW36	C4M429	C4LW36	C4LXL5	C4M429	C4LXL5	C4LXL5	C4M429	C4LXL5	C4LTI6	C4LTI6	C4M0F4	C4M0F4	C4LYV2	C4LYV2	C4LYV2	C4LXL5
C4LZH5	C4MB19	C4LZH5	C4M429	C4LUH8	C4M429	C4M429	C4M8B8	C4LUH8	C4LZH5	C4LUH8	C4M429	C4LZH5	C4M8B8	C4LW36	C4LZH5	C4M429	C4M8B8	C4M8B8	C4LTI6	C4LTI6	C4LTI6	C4LTI6	C4LTI6	C4LW36
Q5NT06	C4M731	Q5NT06	C4LZH5	Q5NT06	C4LZH5	C4LZH5	C4M429	Q5NT06	Q5NT06	C4M3H9	C4LZH5	C4M071	C4M7D1	C4M429	C4M071	C4LZH5	C4M7D1	C4LVE7	C4LXL5	C4M8B8	C4LXD7	C4LXD7	C4M8B8	C4LUH8
C4M1E0	C4M329	C4M1E0	C4M1E0	C4M6Q8	C4M369	C4M369	C4M7D1	C4M9P2	C4M1E0	C4LTX9	C4M071	C4M1E0	C4LVE7	C4M7D1	C4M1E0	C4M071	C4M8Z0	C4M275	C4LW36	C4M3W9	C4LXL5	C4LXL5	C4M3W9	C4LVE7
C4LSG8	C4M6A4	C4M6W9	C4LU72	C4LZC7	C4LWX9	C4LWX9	C4LZH5	C4M6T0	C4LYK1	Q5NT06	Q5NT06	C4LYK1	C4LSN2	C4M5D0	C4LYK1	Q5NT06	C4LVE7	C4M6T0	C4M8B8	C4M369	C4LW36	C4LW36	C4M846	C4M5D0
C4M717	C4LWZ4	C4LSG8	C4LXW1	C4M1I8	C4M1E0	C4M1E0	C4M369	C4LYK1	C4LYS4	C4M9P2	C4MB19	C4LYS4	C4M275	C4LZH5	C4LYS4	C4MB19	C4M275	C4LWD0	C4M3W9	C4M275	C4M8B8	C4M8B8	C4M7D1	C4M3H9
Q9BLE8		C4M717	C4LSG8	C4LZU7	C4LYK1	C4LYK1	C4M275	C4LYB3	Q9Y088	C4M6T0	C4M1E0	C4M350	C4LVX1	C4M369	C4M350	C4M1E0	C4M6T0	C4M3Z1	C4M429	C4LWX9	C4M3W9	C4M3W9	C4LYW1	C4LTX9
C4M3Z5		C4M8K3	C4M622	C4M717	C4LSA7	C4LSA7	C4LWX9	Q9Y088	C4M5F2	C4LYK1	C4LYK1	C4M5F2	C4M6T0	C4LWX9	C4M5F2	C4LYK1	C4LWD0	C4M700	C4LUH8	C4LTU9	C4M429	C4M846	C4M4M5	C4M2A0
Q6AW64		C4LSV2	C4LT64	C4LYE1	C4LXW5	C4LXW5	B1N4I2	C4M6W9	C4M6W9	C4LYB3	C4LYS4	C4M6W9	C4LUX1	C4M3C6	C4M6W9	C4LYS4	C4M3R9	C4MB38	C4M7D1	C4M6T0	C4M846	C4LUH8	C4M071	C4LUD9
C4M8X4		Q9BLE8	C4M3Z5	Q9BLE8	C4M954	C4M954	C4M6T0	C4M3Z1	Q1EQ44	Q9Y088	C4M350	Q1EQ44	C4LWD0	B1N306	Q1EQ44	C4M350	C4LT57	C4M0B6	C4LVE7	C4LWD0	C4LUH8	C4M7D1	C4LY85	C4LTU9
		C4LUV4	B1N4I0	C4M515	C4LU72	C4LU72	C4M1E0	C4M700	C4M3W5	C4M6W9	Q9Y088	C4M3W5	C4LYS4	C4M1E0	C4M3W5	Q9Y088	C4LSA7	B1N486	C4M5D0	C4M3Z1	C4M7D1	C4LYJ7	C4M275	C4M3C6
		C4M2G7	C4M8X4	Q6RCM0	C4LXW1	C4LXW1	C4LWD0	C4M6Q8	C4LU72	C4M3Z1	Q70S43	C4LYT4	Q9Y088	C4LYK1	C4LYT4	Q70S43	C4M3Z1	C4LW71	C4LYW1	C4M3K5	C4LYJ7	C4LVE7	C4M3C6	C4M0C2
		C4LSE0		Q1EQ09	C4LY62	C4LY62	C4M3R9	C4LU72	C4LSG8	C4M700	C4M731	C4M008	C4M3R9	Q9Y088	C4M008	C4M731	C4M700	C4M9T0	C4M3H9	C4M700	C4LVE7	C4M5D0	C4LVX1	C4M6B9
		C4M3Z5		C4LUZ3	C4MAJ3	C4MAJ3	C4LT57	C4LZC7	C4M717	C4M6Q8	C4M5F2	C4M6H8	C4LT57	C4M3R9	C4M6H8	C4M5F2	C4M954	C4LU09	C4LTX9	C4LVJ7	C4M8Z0	C4LYW1	C4M6T0	C4LYI7
		C4M2Q4		Q6AW64	C4M4E9	C4M4E9	C4M3Z1	C4M1I8	C4M8K3	C4M0B6	C4M6W9	C4LU72	C4M3Z1	C4LT57	C4LU72	C4M6W9	C4MB38	C4LZU7	C4M2A0	C4LSY6	C4M5D0	C4M3H9	B1N306	C4LYS4
		Q6AW64		C4LUN4	C4LSG8	C4LSG8	C4M700	C4LU09	C4LSV2	B1N486	Q1EQ44	C4M1I8	C4M3W5	C4LSA7	C4M1I8	Q1EQ44	C4M0B6	C4M5H5	C4M4M5	C4LU72	C4LYW1	C4LTX9	C4M6B9	Q9Y088
		B1N621			C4M9L5	C4M9L5	C4M954	C4LZU7	Q9BLE8	C4LU72	C4M3W5	C4LSG8	C4M700	C4M3K5	C4LSG8	C4M3W5	B1N486	C4LZD0	C4LZH5	C4M9T0	C4M3H9	C4M2A0	C4M0W6	C4LX70
		C4M8X4			C4LSV2	C4LSV2	C4LU72	C4M717	Q1EQ09	C4LZC7	C4LV56	C4LSX7	C4M954	C4LXW5	C4LSX7	C4LV56	C4LW71	C4MA95	C4LSN2	C4LU09	C4LTX9	C4M4M5	C4LWD0	C4M3K5
		C4M3U1			C4MAV0	C4MAV0	C4M9T0	C4M3N7	C4LUV4	C4M1I8	C4LYT4	C4M8K3	C4LW71	C4M954	C4M8K3	C4LYT4	C4M9T0	C4MAY5	C4M369	C4LY62	C4M2A0	C4LYU3	C4M2N7	C4M954
		C4LYU7			C4LY76	C4LY76	C4LU09	C4LYE1	C4M2G7	C4LU09	C4M008	C4LSV2	C4LU09	C4MAK5	C4LSV2	C4M008	C4LU09	C4M118	C4M275	C4MAJ3	C4M4M5	C4M071	C4M0G5	C4LVJ7
					C4LSV3	C4LSV3	C4LY62	C4M224	C4LYW0	C4LZU7	C4M329	C4LUV4	Q6RCM0	C4M9W4	Q1EQ09	C4M329	C4LZU7	C4M024	Q5NT06	C4M777	C4LZH5	C4LUD9	C4M3R9	C4M8V1
					C4LT64	C4LT64	C4MAJ3	C4M8K3	C4LSE0	C4M5H5	C4M6H8	C4M5W5	C4M8P6	C4M1V7	C4LUV4	C4M6H8	C4M5H5	C4M770	C4LWX9	C4M933	C4LYU3	C4LY85	C4LT57	C4M9W4
					C4M3Z5	C4M3Z5	C4LZU7	Q9BLE8	C4M3Z5	C4M717	C4M1V7	C4M2G7	C4M118	C4LU72	C4M5W5	C4M1V7	C4LZD0	C4M3S5	C4M9P2	B1N5B0	C4M071	C4M275	C4M3I8	C4M6Q8
					C4LXS5	C4LXS5	C4LSG8	C4M515	C4M2Q4	C4M3N7	C4LU72	C4LSE0	C4M024	C4LZC7	C4M2G7	C4LU72	C4MA95		C4LTU9	C4M8K3	C4LUD9	C4MB19	C4LWL7	C4LW71
					B1N4I0	B1N4I0	C4M933	Q6RCM0	Q6AW64	C4LYE1	C4M1I8	C4M3Z5	C4M2G7	C4M9T0	C4LYW0	C4M1I8	C4MAY5		C4LVX1	C4M515	C4LY85	C4LTU9	C4M3Z1	C4LZC7
					C4LTY5	C4LTY5	B1N5B0	Q1EQ09	B1N621	C4M224	C4LSG8	C4M2Q4	C4M8M2	C4LXW1	C4LSE0	C4LSG8	C4M118		B1N4I2	Q6RCM0	C4LSN2	C4M3C6	C4M700	C4M9T0
					C4LTP7	C4LTP7	C4M1X6	C4LUZ3	C4M8X4	C4LZD0	C4M717	B1N621	C4LSV3	C4LY62	C4M3Z5	C4M717	C4M024		C4M6T0	C4MAV0	C4M369	C4M0C2	C4M1N5	C4M928
					C4M8X4	C4M8X4	C4MAV0	Q6AW64	C4M3U1	C4M8K3	C4LSX7	C4M8X4	C4LSE0	C4MAJ3	C4M2Q4	C4LSX7	C4LSV3		C4LUX1	C4MAY5	C4M275	C4LVX1	C4MAK5	C4LXG1
					C4M3U1	C4M3U1	C4MAY5	C4LUN4	C4LYU7	C4MA95	Q24801	C4M3U1	C4M2Q4	C4M4E9	B1N621	Q24801	C4M770		C4M1E0	C4M118	C4LYV0	C4M6T0	B1N336	C4M626
					C4M555	C4M555	C4M118	B1N621		Q9BLE8	C4LWZ4	C4LYU7		C4LSG8	C4M8X4	C4LWZ4	C4M3S5		C4LYK1	C4M024	C4MB19	B1N306	C4LSY6	C4LW54
					C4LYU7	C4LYU7	C4LUV4			C4M515				C4LSG3	C4M3U1				C4LYB3	C4M7T9	C4LWX9	C4LUX1	C4M8V1	C4LSG3
					C4M3I5	C4M3I5	C4M024			Q6RCM0				C4M9L5	C4LYU7				C4LWD0	C4LTY5	C4LTU9	C4M6B9	C4MB38	C4LYE1
							C4M2G7			Q1EQ09				C4LSV2					C4LYS4	B1N621	C4M3C6	C4M0W6	C4M0B6	C4M777
							C4LSV3			C4LUZ3				Q6RCM0					Q9Y088	C4M3I5	C4M0C2	C4LYI7	B1N486	C4M515
							C4LSE0			Q6AW64				C4MAV0					C4M6W9		C4LVX1	C4LWD0	C4M1I8	Q6RCM0
							C4M3Z5			C4LUN4				C4LY76					C4M3R9		C4M6T0	C4LYS4	C4M9T0	C4M8P6
							C4M0D9			B1N621				C4MAY5					C4LT57		B1N306	Q9Y088	C4LU09	C4MAY5
							C4M2Q4			C4M770				C4LSV3					C4LSA7		C4LUX1	C4LVR9	B1N384	C4M5W5
							C4LTY5			C4M3S5				C4LT64					C4M3Z1		C4M1E0	C4M731	C4M5H5	C4LSV3
							C4M8X4			C4LYD5				C4M3Z5					C4M3K5		C4LYK1	C4M2N7	C4LSG3	C4LUZ3
							C4M555							C4LXS5					C4LV56		C4M6B9	C4M0G5	C4M3N7	C4LT03
							C4M3I5							C4M7T9					C4M700		C4M0W6	C4M3R9	C4M933	C4M6Y0
														B1N4I0					C4M954		C4LYI7	C4LT57	C4M2T0	C4LUN4
														C4LTY5					C4LVJ7		C4LWD0	C4M3I8	C4LUM9	C4LYD5
														C4LTP7					C4LSY6		C4LYS4	C4LWL7	B1N5B0	C4M0M2
														C4M8X4					C4M8V1		Q9Y088	C4M3Z1	C4M653
														C4M3X0					C4MB38		C4LVR9	C4LVR9	C4LZD0
														C4M3U1					C4M6Q8		C4M731	C4LX70	C4M1X6
														C4M555					C4LW71		C4M2N7	C4M3K5	C4MA95
														C4LYU7					C4LZC7		C4M0G5	C4M700	C4MAY5
														C4M3I5					C4LU72		C4M6W9	C4M3W5	C4M118
																			C4M1I8		C4M3R9	C4M954	B1N5S3
																			C4LU09		C4LT57	C4M1N5	C4M024
																			C4M9T0		C4LSA7	C4MAK5	C4LXS4
																			C4LXW1		C4M3I8	C4LVJ7	C4LT03
																			C4LY62		C4LWL7	B1N336	C4M0D9
																			C4MAJ3		C4M3Q0	C4LSY6	C4LXS5
																			C4LZU7		C4M3Z1	C4M8V1	C4M7T9
																			C4M626		C4LVR9	C4M329	C4LV77
																			C4LSG8		B1N5A8	C4MB38	C4M770
																			C4LW54		C4LX70	C4M9W4	C4M3S5
																			C4M717		C4M3K5	C4M6Q8	C4M555
																			C4M3N7		C4LXW5	C4M0B6	O15729
																			C4LYE1		C4M700	B1N486
																			C4M224		C4M3W5	C4LW71
																			C4M777		C4M954	C4LZC7
																			C4M933		C4M1N5	C4M1I8
																			B1N5B0		C4MAK5	C4LU09
																			C4M8K3		C4LVJ7	C4M9T0
																			C4LSV2		B1N336	C4M928
																			C4M1X6		C4LSY6	C4LVR9
																			Q9BLE8		C4M8V1	B1N2J0
																			C4M515		C4M329	C4LXG1
																			Q6RCM0		C4MB38	B1N384
																			C4M8P6		C4M9W4	C4M626
																			C4MAV0		C4M6Q8	C4M5H5
																			C4MAY5		C4M0B6	C4LW54
																			C4M118		B1N486	C4LSG3
																			Q1EQ09		C4LW71	C4M3N7
																			C4M622		C4M1V7	C4LYE1
																			C4LUV4		C4LZC7	C4M777
																			C4M024		C4LU72	C4M933
																			C4M2G7		C4M1I8	C4M2T0
																			C4LYW0		C4LU09	C4LUM9
																			C4LSV3		C4M9T0	B1N5B0
																			C4LUZ3		C4M928	C4M6A4
																			C4M090		C4LXW1	Q24801
																			C4LSE0		C4LVR9	C4LWZ4
																			C4LT64		B1N2J0	C4M653
																			C4M3Z5		C4LXG1	C4LZD0
																			C4M0D9		B1N384	C4M1X6
																			C4M2Q4		C4LY62	C4MA95
																			Q6AW64		C4MAJ3	C4M515
																			C4M7T9		C4LZU7	Q6RCM0
																			C4LUN4		C4M626	C4M8P6
																			B1N4I0		C4M5H5	C4MAY5
																			C4LTY5		C4LSZ7	C4M118
																			B1N621		C4M4E9	B1N5S3
																			C4M8X4		C4LSG8	C4M024
																			C4LYD5		C4LW54	C4M5W5
																			C4M7I1		C4LSG3	C4LXS4
																			C4M555		C4M3N7	C4M2G7
																			C4LYU7		C4LYE1	C4M8M2
																			C4M3I5		C4M777	C4LSV3
																			O15729		C4M933	C4LUZ3
																					C4M2T0	C4LT03
																					C4LUM9	C4M6Y0
																					C4M9L5	C4LSE0
																					B1N5B0	C4M0D9
																					C4M6A4	C4M2Q4
																					Q24801	C4LXS5
																					C4LWZ4	C4M7T9
																					C4M653	C4LUN4
																					C4LZD0	C4LV77
																					C4LSV2	C4M770
																					C4M1X6	C4M3S5
																					C4MA95	C4LYD5
																					C4M515	C4M0M2
																					Q6RCM0	C4M555
																					C4M8P6	O15729
																					C4MAV0
																					C4LY76
																					C4MAY5
																					C4M118
																					C4LUV4
																					B1N5S3
																					C4M024
																					C4M5W5
																					C4LXS4
																					C4M2G7
																					C4M8M2
																					C4LSV3
																					C4LUZ3
																					C4LT03
																					C4M6Y0
																					C4LSE0
																					C4LT64
																					C4M3Z5
																					C4M0D9
																					C4M2Q4
																					C4LXS5
																					C4M7T9
																					C4LUN4
																					B1N4I0
																					C4LTY5
																					C4LV77
																					C4M770
																					C4LTP7
																					C4M8X4
																					C4M3S5
																					C4M3X0
																					C4LYD5
																					C4M3U1
																					C4M0M2
																					C4M555
																					C4LYU7
																					C4M3I5
																					O15729
